# Supplementary material for: An AKAP-Lbc-RhoA interaction inhibitor promotes the translocation of aquaporin-2 to the plasma membrane of renal collecting duct principal cells
Source: PubMed Central journal article supplement (PMC5786306; doi:10.1371/journal.pone.0191423), 2018-01-26
Supplement: pone.0191423.s001.pdf [file pone.0191423.s001.pdf]

## Supplemental information

### An AKAP-Lbc-RhoA interaction inhibitor

promotes the translocation of aquaporin-2 to the plasma membrane

of renal collecting duct principal cells

Katharina Schrade<sup>1¶</sup>, Jessica Tröger<sup>1¶</sup>, Adeeb Eldahshan<sup>1¶</sup>, Kerstin Zühlke<sup>1</sup>, Kamal R. Abdul Azeez<sup>2</sup>, Jonathan M. Elkins<sup>2</sup>, Martin Neuenschwander<sup>3</sup>, Andreas Oder<sup>3</sup>, Mohamed Elkewedi<sup>1</sup>, Sarah Jaksch<sup>1</sup>, Karsten Andrae<sup>4</sup>, Jinliang Li<sup>5</sup>, Joao Fernandes<sup>1</sup>, Paul Markus Müller<sup>1</sup>, Stephan Grunwald<sup>1</sup>, Stephen F. Marino<sup>1</sup>, Tanja Vukićević<sup>1</sup>, Jenny Eichhorst<sup>3</sup>, Burkhard Wiesner<sup>3</sup>, Marcus Weber<sup>4</sup>, Michael Kapiloff<sup>5</sup>, Oliver Rocks<sup>1</sup>, Oliver Daumke<sup>1</sup>, Thomas Wieland<sup>6,7</sup>, Stefan Knapp<sup>2,8,9</sup>, Jens Peter von Kries<sup>3</sup>, Enno Klussmann<sup>1,10\*</sup>

#### Affiliations

<sup>1</sup>Max Delbrück Center for Molecular Medicine Berlin (MDC), Germany

<sup>2</sup>Structural Genomics Consortium, University of Oxford, United Kingdom

<sup>3</sup>Leibniz-Forschungsinstitut für Molekulare Pharmakologie (FMP), Berlin, Germany

<sup>4</sup>Zuse Institute Berlin (ZIB), Germany

<sup>5</sup>University of Miami Miller School of Medicine, Miami, USA

<sup>6</sup>Institute of Experimental Pharmacology and Toxicology, Medical Faculty Mannheim, Heidelberg University, Germany

<sup>7</sup>DZHK (German Centre for Cardiovascular Research), partner site Heidelberg/Mannheim, Germany

<sup>8</sup>Institute for Pharmaceutical Chemistry and Buchmann Institute, Goethe University, Frankfurt, Germany

<sup>9</sup>DKTK (German Cancer Center Network), partner site Frankfurt/Main, Germany

<sup>10</sup>DZHK (German Centre for Cardiovascular Research), partner site Berlin, Germany

**Running Title:** Disruption of AKAP-Lbc-RhoA interaction with small molecules

**\*Corresponding author**

[enno.klussmann@mdc-berlin.de](mailto:enno.klussmann@mdc-berlin.de)

## Content

|          |                                                                                                                                                                                                                                     |            |
|----------|-------------------------------------------------------------------------------------------------------------------------------------------------------------------------------------------------------------------------------------|------------|
| <b>1</b> | <b>Results</b> .....                                                                                                                                                                                                                | <b>5</b>   |
| 1.1      | Supplementary figures 1-5.....                                                                                                                                                                                                      | 5          |
| 1.2      | Supplementary Tables .....                                                                                                                                                                                                          | 11         |
| 1.2.1    | Suppl. Tab. 1.....                                                                                                                                                                                                                  | 11         |
| 1.2.2    | Suppl. Tab. 2.....                                                                                                                                                                                                                  | 106        |
| 1.2.3    | Suppl. Tab. 3.....                                                                                                                                                                                                                  | 159        |
| <b>2</b> | <b>Material and Methods</b> .....                                                                                                                                                                                                   | <b>172</b> |
| 2.1      | Cell lines.....                                                                                                                                                                                                                     | 172        |
| 2.2      | Plasmids.....                                                                                                                                                                                                                       | 172        |
| 2.3      | Luciferase reporter assays .....                                                                                                                                                                                                    | 173        |
| 2.4      | Chemical synthesis .....                                                                                                                                                                                                            | 173        |
| 2.4.1    | <sup>1</sup> H NMR.....                                                                                                                                                                                                             | 173        |
| 2.4.2    | LC/MS.....                                                                                                                                                                                                                          | 173        |
| 2.4.3    | HPLC .....                                                                                                                                                                                                                          | 174        |
| <b>3</b> | <b>References</b> .....                                                                                                                                                                                                             | <b>175</b> |
| <b>4</b> | <b>Medicinal Chemistry</b> .....                                                                                                                                                                                                    | <b>176</b> |
| 4.1      | Chemical synthesis .....                                                                                                                                                                                                            | 176        |
| 4.1.1    | Iodo-1-[4-(3-methoxyphenyl)phenyl]ethanone ( <b>2a</b> ) .....                                                                                                                                                                      | 176        |
| 4.1.2    | Ethyl 3-(7-hydroxy-4-methyl-2-oxo-chromen-3-yl)propanoate ( <b>5a</b> ) .....                                                                                                                                                       | 179        |
| 4.1.3    | [2-(4-Methoxyphenyl)-2-oxo-ethoxy]-3,4-dimethyl-chromen-2-one ( <b>AE168</b> ) .....                                                                                                                                                | 182        |
| 4.1.4    | 3-(4-Methoxyphenyl)-5,6-dimethyl-furo[3,2- <i>g</i> ]chromen-7-one ( <b>Scaff10</b> ) .....                                                                                                                                         | 185        |
| 4.1.5    | 7-[2-(4-Methoxyphenyl)-2-oxo-ethoxy]chromen-2-one ( <b>AE167</b> ).....                                                                                                                                                             | 188        |
| 4.1.6    | 3-(4-Methoxyphenyl)furo[3,2- <i>g</i> ]chromen-7-one ( <b>Scaff10-1</b> ).....                                                                                                                                                      | 191        |
| 4.1.7    | 3,4-Dimethyl-7-[2-oxo-2-(3-pyridyl)ethoxy]chromen-2-one ( <b>Scaff10-2</b> ) .....                                                                                                                                                  | 194        |
| 4.1.8    | 5,6-Dimethyl-3-(3-pyridyl)furo[3,2- <i>g</i> ]chromen-7-one ( <b>Scaff10-3</b> ) .....                                                                                                                                              | 197        |
| 4.1.9    | 7-[2-[6-(4-Fluorophenyl)-2-methyl-3-pyridyl]-2-oxo-ethoxy]-3,4-dimethyl-chromen-2-one ( <b>Scaff10-4</b> ) .....                                                                                                                    | 200        |
| 4.1.10   | 3-[6-(4-Fluorophenyl)-2-methyl-3-pyridyl]-5,6-dimethyl-furo[3,2- <i>g</i> ]chromen-7-one ( <b>Scaff10-5</b> ).....                                                                                                                  | 203        |
| 4.1.11   | 3-[7-[2-(4-Methoxyphenyl)-2-oxo-ethoxy]-4-methyl-2-oxo-chromen-3-yl]propanoic acid ( <b>Scaff10-6</b> ) .....                                                                                                                       | 206        |
| 4.1.12   | Ethyl 3-[7-[2-(4-methoxyphenyl)-2-oxo-ethoxy]-4-methyl-2-oxo-chromen-3-yl]propanoate ( <b>Scaff10-7</b> ) .....                                                                                                                     | 209        |
| 4.1.13   | 3-[3-(4-Methoxyphenyl)-5-methyl-7-oxo-furo[3,2- <i>g</i> ]chromen-6-yl] propanoic acid ( <b>Scaff10-8</b> ).....                                                                                                                    | 212        |
| 4.1.14   | <i>N</i> -[2-[3-[7-[2-(4-Methoxyphenyl)-2-oxo-ethoxy]-4-methyl-2-oxo-chromen-3-yl]propanoylamino]ethyl]-5-(2-oxo-1,3,3 <i>a</i> ,4,6,6 <i>a</i> -hexahydrothieno[3,4- <i>d</i> ]imidazol-4-yl)pentanamide ( <b>Scaff10-9</b> )..... | 215        |
| 4.1.15   | Ethyl 3-[7-[2-[6-(4-fluorophenyl)-2-methyl-3-pyridyl]-2-oxo-ethoxy]-4-methyl-2-oxo-chromen-3-yl]propanoate ( <b>Scaff10-10</b> ) .....                                                                                              | 217        |

|        |                                                                                                                                      |     |
|--------|--------------------------------------------------------------------------------------------------------------------------------------|-----|
| 4.1.16 | 3-[7-[2-[6-(4-Fluorophenyl)-2-methyl-3-pyridyl]-2-oxo-ethoxy]-4-methyl-2-oxo-chromen-3-yl]propanoic acid ( <b>Scaff10-11</b> ).....  | 220 |
| 4.1.17 | 3,4-Dimethyl-7-[2-(2-naphthyl)-2-oxo-ethoxy]chromen-2-one ( <b>Scaff10-12</b> ).....                                                 | 222 |
| 4.1.18 | 3,4-Dimethyl-7-[2-oxo-2-(4-phenylphenyl)ethoxy]chromen-2-one ( <b>Scaff10-13</b> ).....                                              | 225 |
| 4.1.19 | 3,4-Dimethyl-7-[2-oxo-2-(4-phenoxyphenyl)ethoxy]chromen-2-one ( <b>Scaff10-14</b> ).....                                             | 228 |
| 4.1.20 | 7-[2-(6-Methoxy-2-naphthyl)-2-oxo-ethoxy]-3,4-dimethyl-chromen-2-one ( <b>Scaff10-15</b> )<br>231                                    |     |
| 4.1.21 | Ethyl 3-[4-methyl-2-oxo-7-[2-oxo-2-(4-phenoxyphenyl)ethoxy]chromen-3-yl]propanoate ( <b>Scaff10-17</b> ).....                        | 234 |
| 4.1.22 | 3-[5-Methyl-3-(2-naphthyl)-7-oxo-furo[3,2- <i>g</i> ]chromen-6-yl]propanoic acid ( <b>Scaff10-25</b> )<br>237                        |     |
| 4.1.23 | 3-[3-(4-Methoxyphenyl)-5-methyl-7-oxo-furo[3,2- <i>g</i> ]chromen-6-yl]- <i>N,N</i> -dimethyl-propanamide ( <b>Scaff10-26</b> )..... | 239 |
| 4.1.24 | 3-[3-(4-Methoxyphenyl)-5-methyl-7-oxo-furo[3,2- <i>g</i> ]chromen-6-yl]- <i>N</i> -(3-pyridyl)propanamide ( <b>Scaff10-27</b> )..... | 242 |
| 4.1.25 | Ethyl 3-[4-methyl-2-oxo-7-[2-oxo-2-[4-(trifluoromethyl)phenyl]ethoxy]chromen-3-yl]propanoate ( <b>Scaff10-28</b> ).....              | 245 |
| 4.1.26 | 3-[4-Methyl-2-oxo-7-[2-oxo-2-[4-(trifluoromethyl)phenyl]ethoxy]chromen-3-yl]propanoic acid ( <b>Scaff10-29</b> ).....                | 248 |
| 4.1.27 | 3-[5-Methyl-7-oxo-3-[4-(trifluoromethyl)phenyl]furo[3,2- <i>g</i> ]chromen-6-yl]propanoic acid ( <b>Scaff10-30</b> ).....            | 251 |
| 4.1.28 | Ethyl 3-[4-methyl-2-oxo-7-[2-oxo-2-(4-pyridyl)ethoxy]chromen-3-yl]propanoate ( <b>Scaff10-31</b> ).....                              | 253 |
| 4.1.29 | 3-[5-Methyl-7-oxo-3-(4-pyridyl)furo[3,2- <i>g</i> ]chromen-6-yl]propanoic acid ( <b>Scaff10-32</b> )<br>256                          |     |
| 4.1.30 | Ethyl 3-[7-[2-[4-(dimethylamino)phenyl]-2-oxo-ethoxy]-4-methyl-2-oxo-chromen-3-yl]propanoate ( <b>Scaff10-34</b> ).....              | 258 |
| 4.1.31 | 3-[7-[2-[4-(Dimethylamino)phenyl]-2-oxo-ethoxy]-4-methyl-2-oxo-chromen-3-yl]propanoic acid ( <b>Scaff10-35</b> ).....                | 261 |
| 4.1.32 | 3-(4-Methyl-2-oxo-7-[2-oxo-2-(4-phenoxyphenyl)ethoxy]chromen-3-yl)propanoic acid ( <b>Scaff10-37</b> ).....                          | 264 |
| 4.1.33 | 3-[5-Methyl-7-oxo-3-(4-phenoxyphenyl)furo[3,2- <i>g</i> ]chromen-6-yl]propanoic acid ( <b>Scaff10-38</b> ).....                      | 266 |
| 4.1.34 | Ethyl 3-[4-methyl-2-oxo-7-[2-oxo-2-(4-phenylphenyl)ethoxy]chromen-3-yl]propanoate ( <b>Scaff10-39</b> ).....                         | 269 |
| 4.1.35 | 3-[4-Methyl-2-oxo-7-[2-oxo-2-(4-phenylphenyl)ethoxy]chromen-3-yl]propanoic acid ( <b>Scaff10-40</b> ).....                           | 272 |
| 4.1.36 | 3-[5-Methyl-7-oxo-3-(4-phenylphenyl)furo[3,2- <i>g</i> ]chromen-6-yl]propanoic acid ( <b>Scaff10-41</b> ).....                       | 275 |
| 4.1.37 | Ethyl 3-(7-[2-(6-methoxy-2-naphthyl)-2-oxo-ethoxy]-4-methyl-2-oxo-chromen-3-yl)propanoate ( <b>Scaff10-42</b> ).....                 | 278 |
| 4.1.38 | 3-(7-[2-(6-Methoxy-2-naphthyl)-2-oxo-ethoxy]-4-methyl-2-oxo-chromen-3-yl)propanoic acid ( <b>Scaff10-43</b> ).....                   | 281 |
| 4.1.39 | 3-[7-Methoxy-6-[1-(6-methoxy-2-naphthyl)vinyl]-4-methyl-2-oxo-chromen-3-yl]propanoic acid ( <b>Scaff10-44</b> ).....                 | 284 |

|        |                                                                                                                                              |     |
|--------|----------------------------------------------------------------------------------------------------------------------------------------------|-----|
| 4.1.40 | 3-[3-[6-(4-Fluorophenyl)-2-methyl-3-pyridyl]-5-methyl-7-oxo-furo[3,2- <i>g</i> ]chromen-6-yl]propanoic acid ( <b>Scaff10-45</b> ) .....      | 287 |
| 4.1.41 | 5,6-Dimethyl-3-(4-phenylphenyl)furo[3,2- <i>g</i> ]chromen-7-one ( <b>Scaff10-46</b> ) .....                                                 | 290 |
| 4.1.42 | 3-(6-Methoxy-2-naphthyl)-5,6-dimethyl-furo[3,2- <i>g</i> ]chromen-7-one ( <b>Scaff10-47</b> ) .....                                          | 293 |
| 4.1.43 | Methyl 3-[3-(4-methoxyphenyl)-5-methyl-7-oxo-furo[3,2- <i>g</i> ]chromen-6-yl]propanoate ( <b>Scaff10-48</b> ) .....                         | 296 |
| 4.1.44 | 3-[3-(4-Methoxyphenyl)-5-methyl-7-oxo-furo[3,2- <i>g</i> ]chromen-6yl]propanehydroxamic acid ( <b>Scaff10-51</b> ) .....                     | 299 |
| 4.1.45 | Ethyl 3-[7-[2-(4-hydroxyphenyl)-2-oxo-ethoxy]-4-methyl-2-oxo-chromen-3-yl]propanoate ( <b>Scaff10-52</b> ) .....                             | 302 |
| 4.1.46 | Ethyl 3-[7-[2-[4-[2-(4-hydroxyphenyl)-2-oxo-ethoxy]phenyl]-2-oxo-ethoxy]-4-methyl-2-oxo-chromen-3-yl]propanoate ( <b>Scaff10-52d</b> ) ..... | 305 |
| 4.1.47 | Ethyl 3-(4-methyl-2-oxo-7-phenacyloxy-chromen-3-yl)propanoate ( <b>Scaff10-56</b> ) .....                                                    | 308 |
| 4.1.48 | 3-(5-Methyl-7-oxo-3-phenyl-furo[3,2- <i>g</i> ]chromen-6-yl)propanoic acid ( <b>Scaff10-58</b> ) ..                                          | 311 |
| 4.1.49 | Ethyl 3-[7-[(4-methoxyphenyl)methoxy]-4-methyl-2-oxo-chromen-3-yl]propanoate ( <b>Scaff10-59</b> ) .....                                     | 314 |
| 4.1.50 | 3-[7-[(4-Methoxyphenyl)methoxy]-4-methyl-2-oxo-chromen-3-yl]propanoic acid ( <b>Scaff10-60</b> ) .....                                       | 317 |
| 4.1.51 | 2-[3-[3-(4-Methoxyphenyl)-5-methyl-7-oxo-furo[3,2- <i>g</i> ]chromen-6-yl]propanoylamino]acetic acid ( <b>Scaff10-61</b> ) .....             | 320 |
| 4.1.52 | Ethyl 3-[7-[2-[4-(3-methoxyphenyl)phenyl]-2-oxo-ethoxy]-4-methyl-2-oxo-chromen-3-yl]propanoate ( <b>Scaff10-62</b> ) .....                   | 323 |
| 4.1.53 | 3-[7-[2-[4-(3-Methoxyphenyl)phenyl]-2-oxo-ethoxy]-4-methyl-2-oxo-chromen-3-yl]propanoic acid ( <b>Scaff10-63</b> ) .....                     | 326 |
| 4.1.54 | 3-[3-[4-(3-Methoxyphenyl)phenyl]-5-methyl-7-oxo-furo[3,2- <i>g</i> ]chromen-6-yl]propanoic acid ( <b>Scaff10-64</b> ) .....                  | 329 |

# 1 Results

## 1.1 Supplementary figures 1-5

### Supplemental Figure 1

**A**

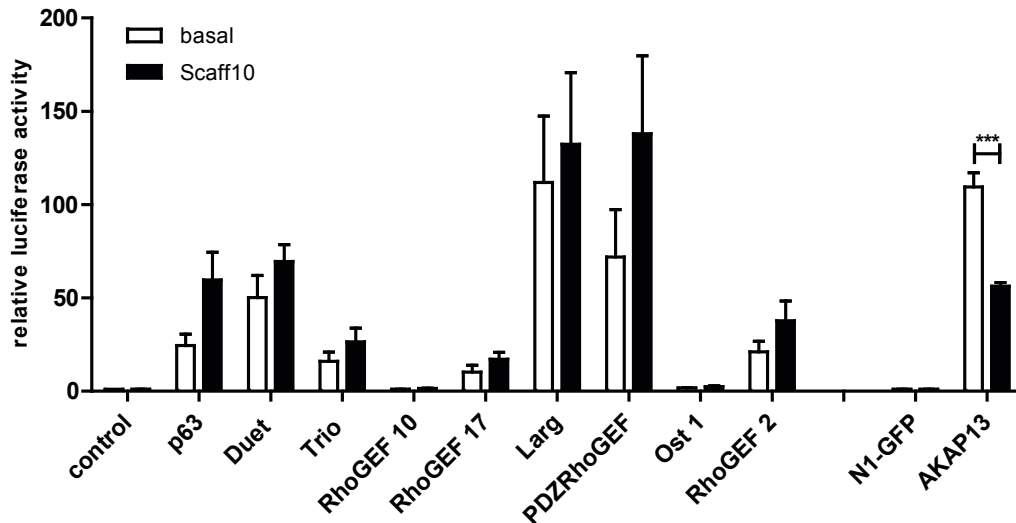

**B**

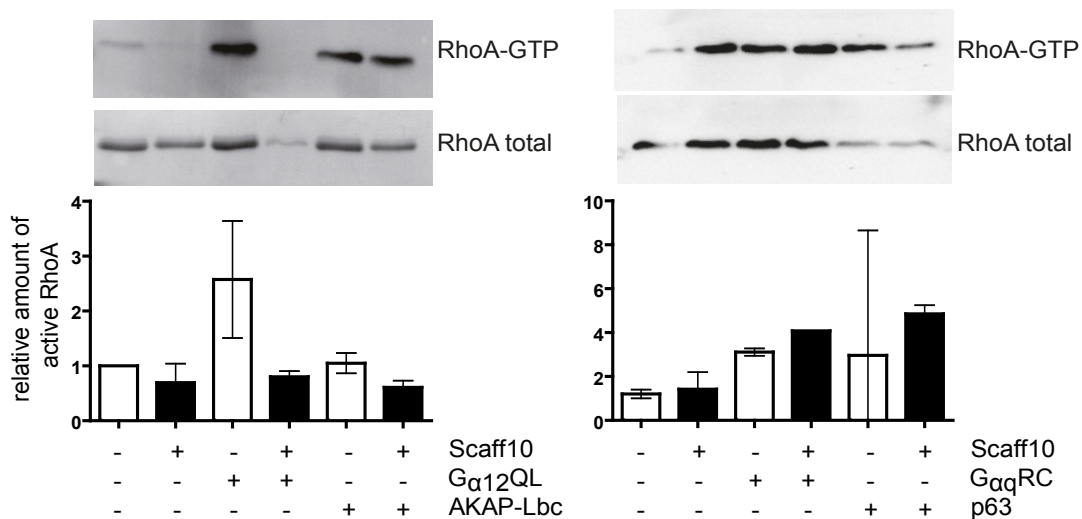

**Supplemental Figure 1. Scaff10 specifically inhibits the Gα12-AKAP-Lbc-mediated activation of RhoA.** (A) Full length AKAP-Lbc (AKAP13) and the indicated GEFs were transiently expressed in HEK293 cells. Upper panel: Scaff10 concentration-dependently inhibits the AKAP-Lbc-mediated stress response element-induced luciferase activity but at a concentration of 50 μM does not affect increases in luciferase activity induced by other GEFs. n=3; statistically significant differences were not found, as confirmed by statistical analysis using ANOVA. (B) Scaff10 inhibits Gα12- but not Gαq-mediated RhoA activation. The indicated Gα12 and Gαq-mutants were transiently co-expressed with AKAP-Lbc and p63RhoGEF in HEK293 cells as indicated. The cells were left untreated or incubated with Scaff10 (50 μM). The fraction of active RhoA was determined using Rhotekin pulldown assays as described [1]. Shown is one representative out of three experiments. All GEF constructs were in pCMV3a and Myc-tagged (30 ng per transfection). Expression and specificity of the assay for Rho were previously determined through inhibition of RhoA with C3 toxin [2-4]. Expression of AKAP-Lbc, LARG and PDZ-RhoGEF is shown in Figure 7 of the main manuscript.

## Supplemental Figure 2

**A**

```

TCC AAA CAG CTG GAA GCA GAG TCT TGG AGT CGG ATA ATA GAC AGC AAG TTT CTA AAA CAG CAA AAG AAA GAT GTG GTC
                                     ↓   ↓
                                     C   C

AAA CGG CAA GAA GTA ATA TAT GAG TTG ATG CAG ACA GAG TTT CAT CAT GTC CGC ACT CTC AAG ATC ATG AGT GGT GTG
                ↓   ↓
                G   C

TAC AGC CAG GGG ATG ATG GCG GAT CTG CTT TTT GAG CAG CAG ATG GTA GAA AAG CTG TTC CCC TGT TTG GAT GAG CTG
ATC AGT ATC CAT AGC CAA TTC TTC CAG AGG ATT CTG GAG CGG AAG AAG GAG TCT CTG GTG GAT AAA AGT GAA AAG AAC
TTT CTC ATC AAG AGG ATA GGG GAT GTG CTT GTA AAT CAG TTT TCA GGT GAG AAT GCA GAA CGT TTA AAG AAG ACA TAT
                                     ↓ ↓ ↓
                                     G C G

GGC AAG TTT TGT GGG CAA CAT AAC CAG TCT GTA AAC TAC TTC AAA GAC CTT TAT GCC AAG GAT AAG CGT TTT CAA GCC
TTT GTA AAG AAG AAG ATG AGC AGT TCA GTT GTT AGA AGG CTT GGA ATT CCA GAG TGC ATA TTG CTT GTA ACT CAG CGG
ATT ACC AAG TAC CCA GTT TTA TTC CAA AGA ATA TTG CAG TGT ACC AAA GAC AAT GAA GTG GAG CAG GAA GAT CTA GCA
CAG TCC TTG AGC CTG GTG AAG GAT GTG ATT GGA GCT GTA GAC AGC AAA GTG GCA AGT TAT GAA AAG AAA GTG CGT CTC
AAT GAG ATT TAT ACA AAG ACA GAT AGC AAG TCA ATC ATG AGG ATG AAG AGT GGT CAG ATG TTT GCC AAG GAA GAT TTG
AAA CGG AAG AAG CTT GTA CGT GAT GGG AGT GTG TTT CTG AAG AAT GCA GCA GGA AGG TTG AAA GAG GTT CAA GCA GTT
                ↓   ↓
                G   G

CTT CTC ACT GAC ATT TTA GTT TTC CTT CAA GAA AAA GAC CAG AAG TAC ATC TTT GCA TCA TTG GAC CAG AAG TCA ACA
GTG ATC TCT TTA AAG AAG CTG ATT GTG AGA GAA GTG GCA CAT GAG GAG AAA GGT TTA TTC CTG ATC AGC ATG GGG ATG
ACA GAT CCA GAG ATG GTA GAA GTC CAT GCC AGC TCC AAA GAG GAA CGA AAC AGC TGG ATT CAG ATC ATT CAG GAC ACA
  
```

**B**

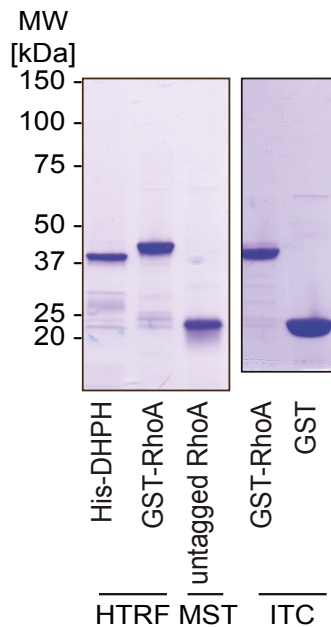

**Supplemental Figure 2.** (A) The sequence of the AKAP-Lbc/DHPH domain (5,914-7,005 bp, NCBI accession number CCDS32320.1) was mutated in order to remove rare codons and genetically fused with GFP and a His<sub>6</sub> tag. Substituted base pairs are indicated in red. (B) Purified recombinant proteins for subsequent assays. SDS-PAGE followed by Coomassie staining: His<sub>6</sub>-AKAP-Lbc/DHPH (46 kDa) and GST-RhoA (48 kDa) were used for the HTRF assay and ITC; untagged RhoA (22 kDa) and GST were used for ITC (28 kDa). 2 μg of each protein were loaded.

## Supplemental Figure 3

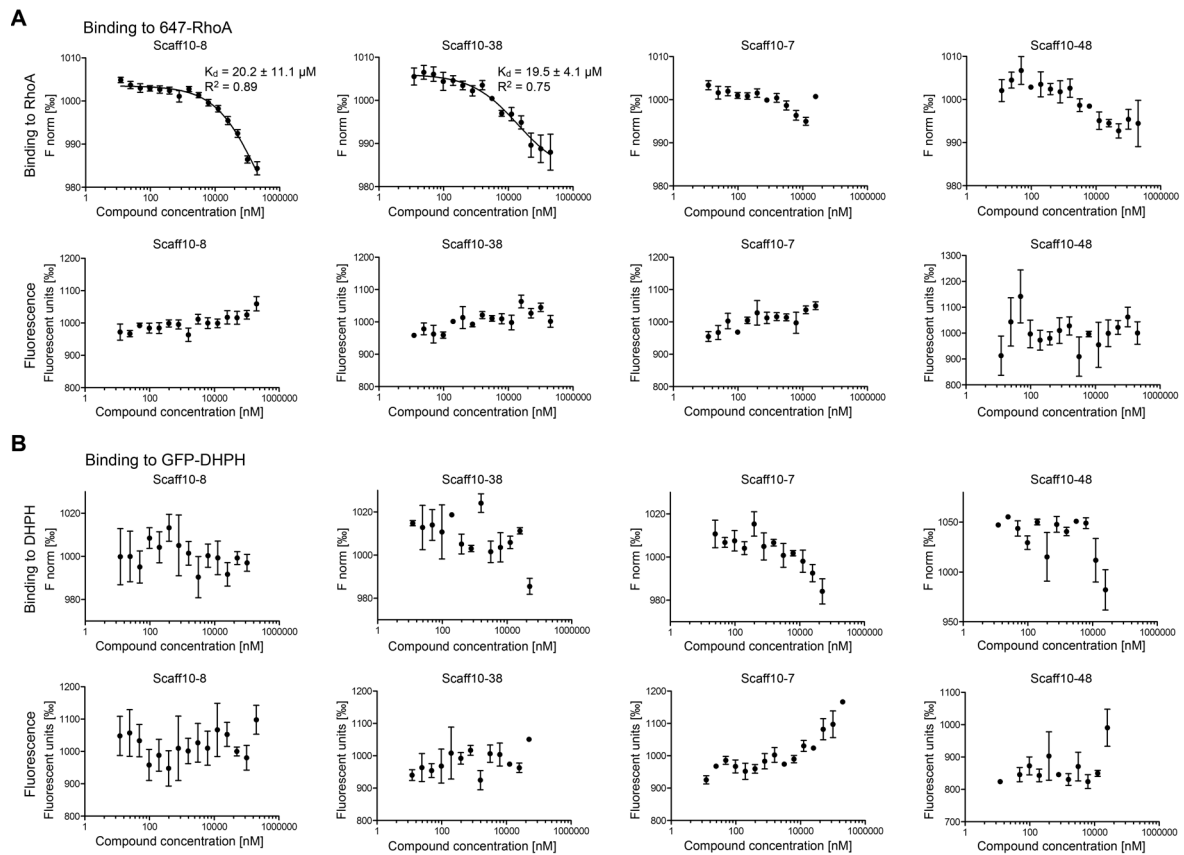

**Supplemental Figure 3.** Scaff10 derivatives, Scaff10-8 and Scaff10-38 inhibiting the AKAP-Lbc-RhoA interaction in our HTRF assay bound RhoA, not the AKAP-Lbc/DHPH domain. Results of MST assays. (A) Upper panel: The concentration of fluorescent 647-RhoA remained constant whereas Scaff10-8, Scaff10-38, Scaff10-7 and Scaff10-48 (ligands) were added in increasing concentrations. The  $K_d$  values for the binding of Scaff10-8 and Scaff10-38 to RhoA are  $20.2 \pm 11.1 \mu\text{M}$  and  $19.5 \pm 4.1 \mu\text{M}$ , respectively. Lower panel: Corresponding values of fluorescence to upper panel. (B) Upper panel: The concentration of fluorescent GFP-AKAP-Lbc/DHPH remained constant whereas Scaff10-8, Scaff10-38, Scaff10-7 and Scaff10-48 (ligands) were added in increasing concentrations. Lower panel: Corresponding values of fluorescence to upper panel. (B) F norm = normalised fluorescence (fluorescence steady state/fluorescence initial state) indicated in %. Compound concentration [nM] refers to the appropriate ligand.  $n = 3-5$ . Mean  $\pm$  SEM is plotted.  $K_d$  values are indicated  $\pm$  SEM.  $R^2$  indicates the coefficient of determination. The results of the Scaff10-8 and Scaff10-7 derivatives are shown in the main manuscript and are here included for direct comparison.

## Supplemental Figure 4

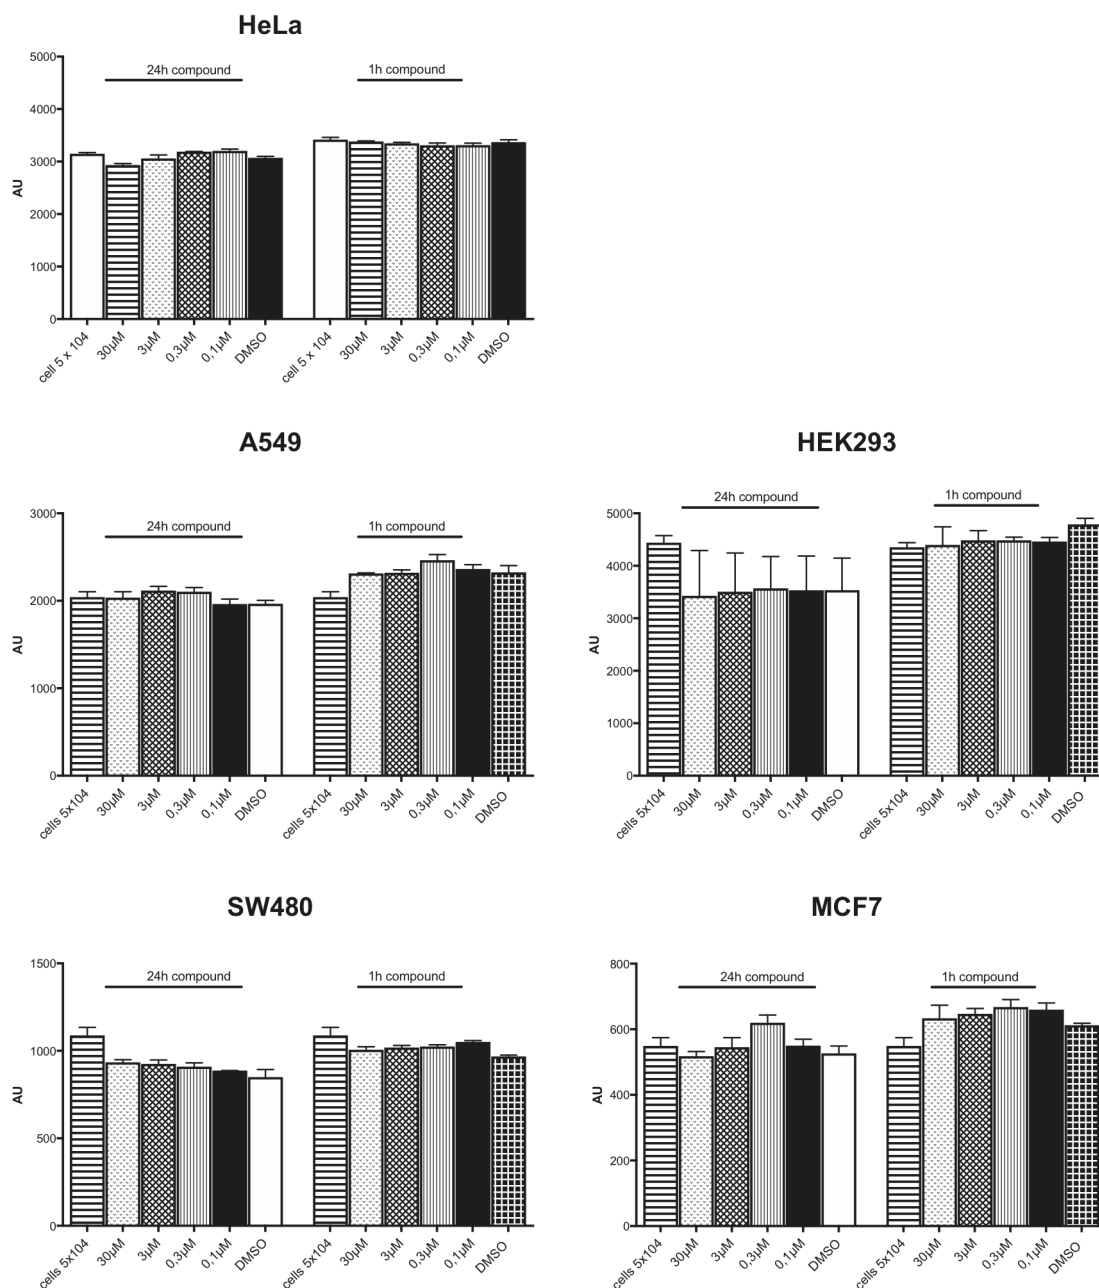

**Supplemental Figure 4. Scaff10-8 does not affect viability of cells.** The viability of the indicated cells was determined using a CellTiter-Glo<sup>®</sup> Luminescent Cell Viability Assay (Promega, Wisconsin, USA) according to the manufacturer's instructions. The assay is based on the quantification of ATP as an indicator of metabolically active cells. The cells were seeded, grown for 24 h and treated with the different concentrations of Scaff 10-8. Viability was assessed after 1 and 24 h incubation with Scaff10-8 in the indicated concentrations. An equal volume of CellTiter-Glo<sup>®</sup> Reagent was added, plates were shaken and luminescence monitored over time with the plates held at 22 °C. Mono-oxygenation of luciferin is catalyzed by luciferase in the presence of Mg<sup>2+</sup>, ATP and molecular oxygen. DMSO was used as a control. Relative luminescent signals (RLU) was measured and normalized to untreated cells, n = 3. Statistically significant differences were determined applying one-way ANOVA with posthoc Bonferroni. Mean ± SD is plotted.



# Supplemental Figure 5

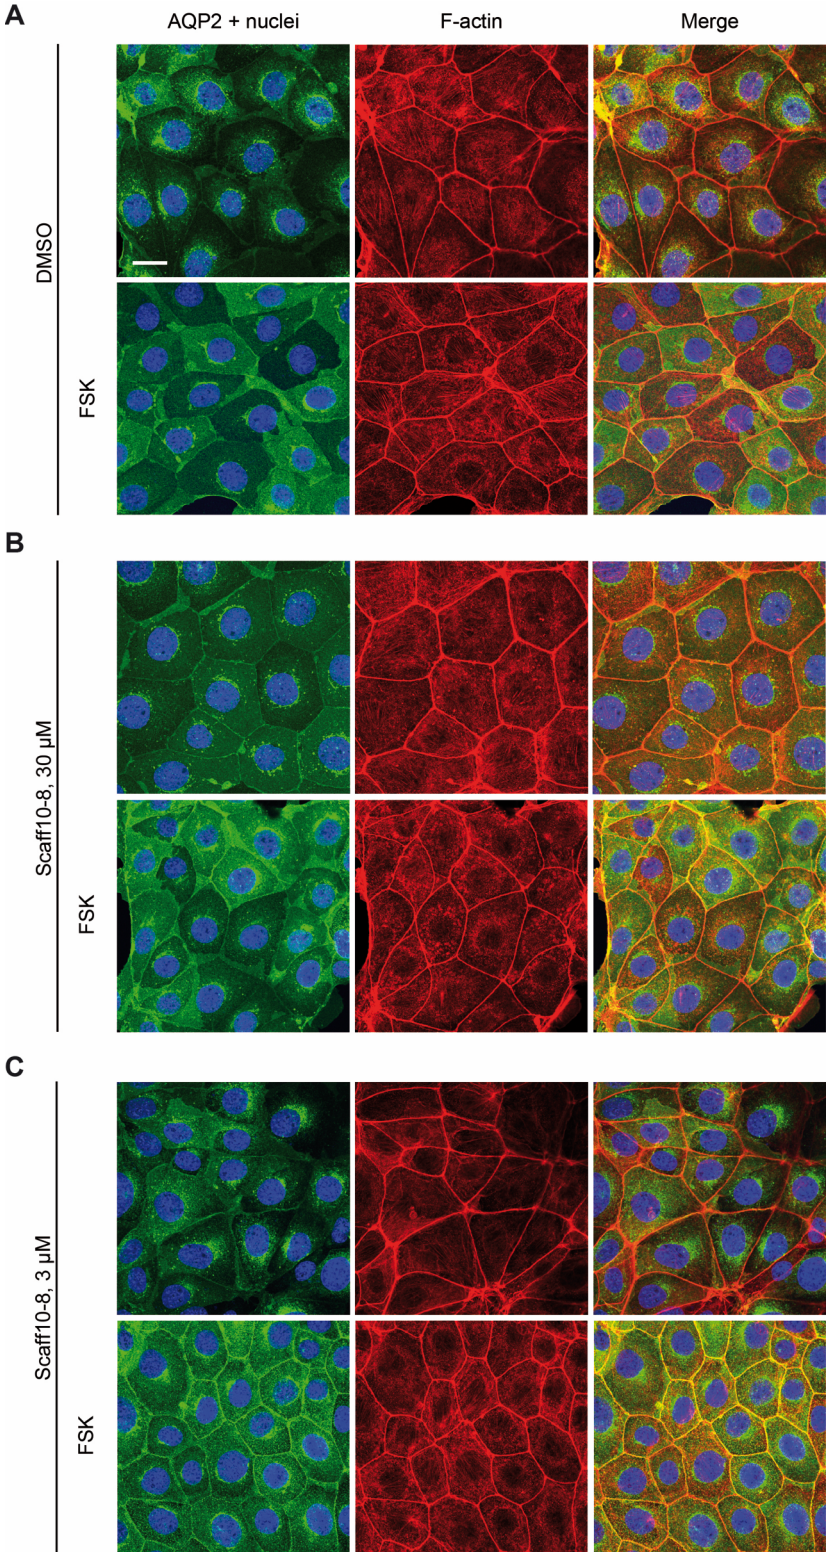

D

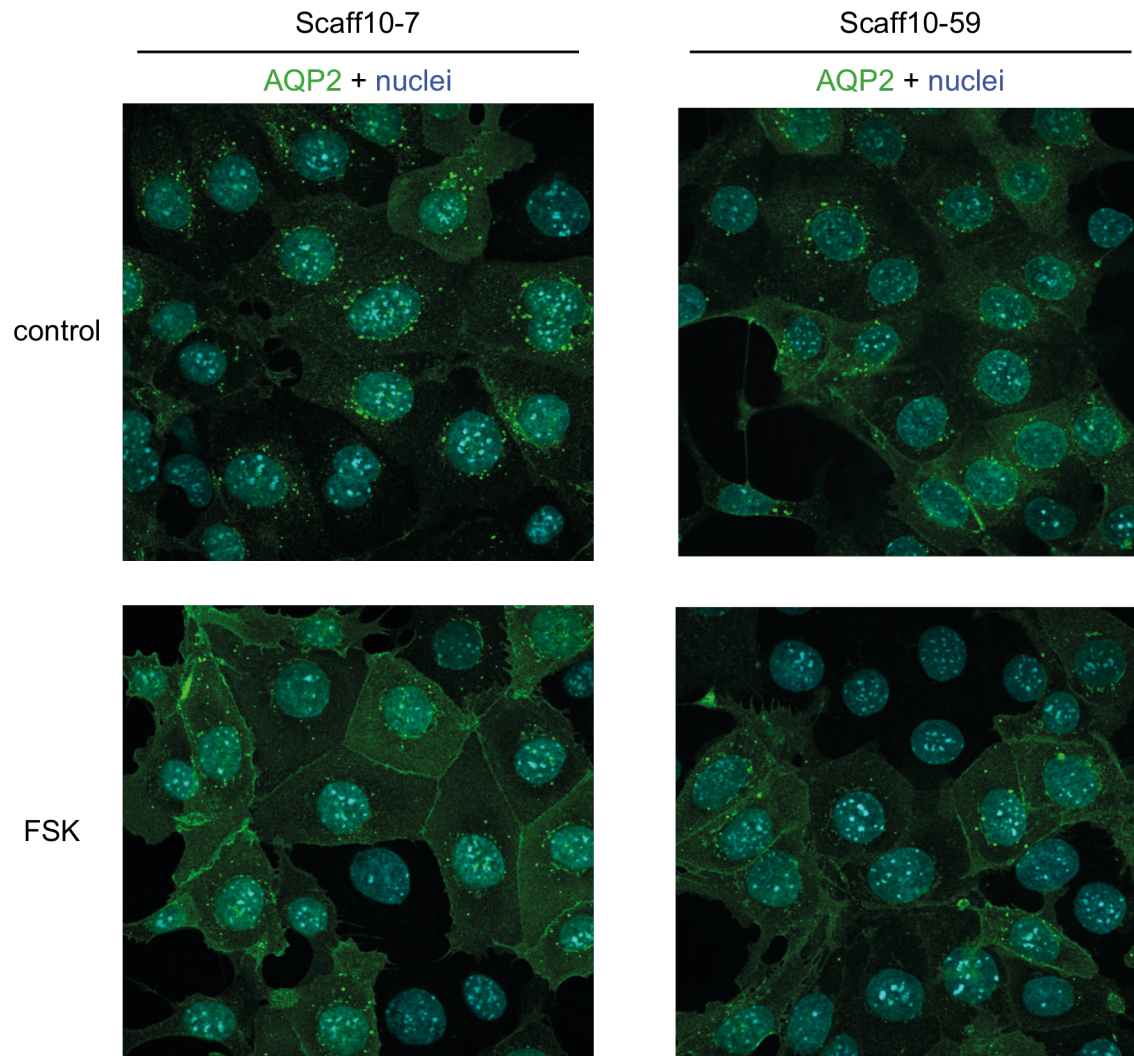

**Supplemental Figure 5. Scaff10-8 but not Scaff10-7 or Scaff10-59 induced the translocation of AQP2 to the plasma membrane of MCD4 cells independent of cAMP elevation.** MCD4 cells were left untreated (A) or incubated with 30 (B) or 3  $\mu$ M (C) Scaff10-8 and stimulated with forskolin (FSK). DMSO was used as a control (A). As negative controls, the cells were incubated with Scaff10-7 and Scaff10-59 (30  $\mu$ M each), which were inactive in our HTRF assay. AQP2 stained in green, nuclei stained in blue, F-actin stained in red. Scale bar indicates 20  $\mu$ m. Representative images are shown. n = 3.

**1.2 Supplementary Tables**  
**1.2.1 Suppl. Tab. 1**

| Comp_ID | z_score | ResidualPerce | PNG_Image                                                                           | Selected_for_Validation |
|---------|---------|---------------|-------------------------------------------------------------------------------------|-------------------------|
| 27239   | -359.1  | -5460.0       | 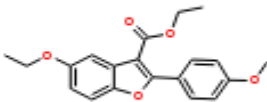   |                         |
| 28204   | -374.3  | -4229.0       |    |                         |
| 27243   | -275.6  | -4168.0       |    |                         |
| 29986   | -454.7  | -4017.0       |  |                         |
| 27241   | -245.5  | -3702.0       |  |                         |
| 28166   | -308.9  | -3471.0       |  |                         |
| 30293   | -351.8  | -3083.0       |  |                         |

|       |        |         |                                                                                     |     |
|-------|--------|---------|-------------------------------------------------------------------------------------|-----|
| 34149 | -228.5 | -2785.0 | 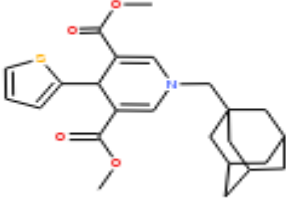   |     |
| 29988 | -302.5 | -2641.0 |    |     |
| 28200 | -199.4 | -2205.0 |    |     |
| 27245 | -143.0 | -2117.0 |   | yes |
| 31865 | -186.1 | -1997.0 |  |     |
| 32682 | -159.5 | -1463.0 |  |     |
| 30988 | -136.3 | -1365.0 |  |     |



|       |        |         |                                                                                     |  |  |
|-------|--------|---------|-------------------------------------------------------------------------------------|--|--|
| 27213 | -78.3  | -1116.0 | 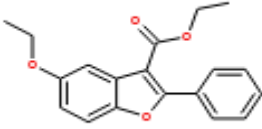   |  |  |
| 31859 | -105.7 | -1094.0 |    |  |  |
| 28751 | -123.3 | -1034.0 |    |  |  |
| 32254 | -117.2 | -987.0  |   |  |  |
| 32883 | -105.6 | -935.0  |  |  |  |
| 28687 | -111.9 | -929.0  |  |  |  |
| 33542 | -69.4  | -886.0  |  |  |  |

|       |        |        |                                                                                     |     |
|-------|--------|--------|-------------------------------------------------------------------------------------|-----|
| 26490 | -128.5 | -876.0 | 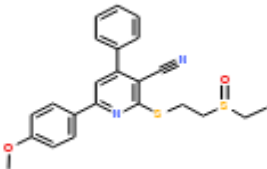   |     |
| 31891 | -83.7  | -848.0 |    |     |
| 27235 | -60.7  | -843.0 |    |     |
| 30677 | -100.1 | -813.0 |   |     |
| 28170 | -76.8  | -786.0 |  |     |
| 35955 | -49.0  | -755.0 |  | yes |
| 28683 | -92.5  | -752.0 |  |     |



|        |        |        |                                                                                     |     |
|--------|--------|--------|-------------------------------------------------------------------------------------|-----|
| 28172  | -72.4  | -736.0 | 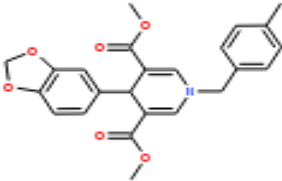   |     |
| 102315 | -110.9 | -728.0 |    |     |
| 30839  | -86.4  | -688.0 |    |     |
| 30867  | -79.5  | -626.0 |   |     |
| 35899  | -41.4  | -624.0 |  | yes |
| 27237  | -46.4  | -622.0 |  |     |
| 32767  | -71.6  | -602.0 |  |     |

|       |       |        |                                                                                     |  |
|-------|-------|--------|-------------------------------------------------------------------------------------|--|
| 31863 | -61.7 | -600.0 | 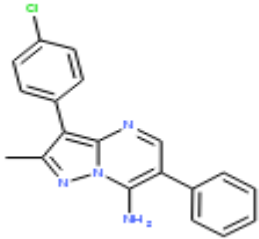   |  |
| 27207 | -44.6 | -595.0 |    |  |
| 36841 | -44.1 | -588.0 |    |  |
| 34462 | -52.6 | -587.0 |   |  |
| 28176 | -58.9 | -580.0 |  |  |
| 31297 | -58.5 | -580.0 |  |  |
| 26732 | -44.3 | -561.0 |  |  |

|       |       |        |                                                                                     |  |
|-------|-------|--------|-------------------------------------------------------------------------------------|--|
| 38121 | -46.9 | -560.0 | 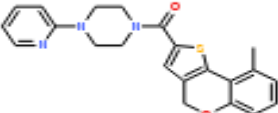   |  |
| 28855 | -58.9 | -544.0 |    |  |
| 28196 | -53.6 | -517.0 |    |  |
| 36648 | -39.4 | -516.0 |   |  |
| 30195 | -67.2 | -515.0 |  |  |
| 27853 | -46.6 | -514.0 |  |  |
| 30701 | -66.2 | -506.0 |  |  |

|       |       |        |                                                                                     |  |  |
|-------|-------|--------|-------------------------------------------------------------------------------------|--|--|
| 35860 | -34.5 | -504.0 | 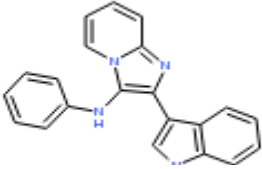   |  |  |
| 25001 | -57.2 | -499.0 |    |  |  |
| 30865 | -63.3 | -480.0 |    |  |  |
| 36846 | -35.7 | -458.0 |   |  |  |
| 28777 | -60.2 | -457.0 |  |  |  |
| 27572 | -41.2 | -451.0 |  |  |  |
| 36265 | -31.4 | -442.0 |  |  |  |

|        |       |        |                                                                                     |     |
|--------|-------|--------|-------------------------------------------------------------------------------------|-----|
| 28407  | -45.0 | -419.0 | 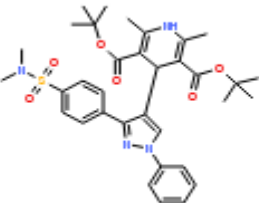   |     |
| 39624  | -59.1 | -411.0 |    |     |
| 36650  | -32.2 | -403.0 |    |     |
| 39465  | -58.0 | -402.0 |   |     |
| 26756  | -33.3 | -399.0 |  |     |
| 101618 | -53.8 | -377.0 |  | yes |
| 33896  | -36.3 | -376.0 |  |     |

|       |       |        |                                                                                     |     |
|-------|-------|--------|-------------------------------------------------------------------------------------|-----|
| 27201 | -30.2 | -371.0 | 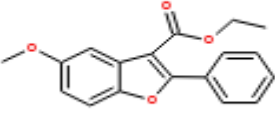   |     |
| 36466 | -27.2 | -371.0 |    | yes |
| 36330 | -26.6 | -361.0 |    |     |
| 28853 | -41.7 | -357.0 |   |     |
| 35915 | -26.1 | -357.0 |  |     |
| 29962 | -49.1 | -352.0 |  |     |
| 33140 | -29.3 | -349.0 |  |     |

|        |       |        |                                                                                     |     |
|--------|-------|--------|-------------------------------------------------------------------------------------|-----|
| 36472  | -25.2 | -336.0 | 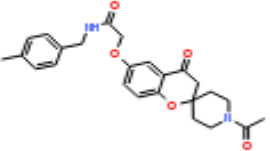   | yes |
| 27849  | -32.7 | -333.0 |    |     |
| 102327 | -57.9 | -333.0 |    |     |
| 30024  | -45.8 | -321.0 |   |     |
| 30329  | -46.0 | -321.0 |  |     |
| 29852  | -46.6 | -319.0 |  |     |
| 35080  | -28.4 | -314.0 |  |     |

|       |       |        |                                                                                     |     |
|-------|-------|--------|-------------------------------------------------------------------------------------|-----|
| 31240 | -37.9 | -310.0 | 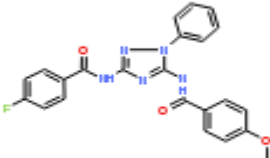   |     |
| 31102 | -37.8 | -309.0 |    |     |
| 24501 | -37.2 | -300.0 |    |     |
| 26760 | -26.2 | -295.0 |   | yes |
| 24997 | -37.3 | -291.0 |  |     |
| 35897 | -22.1 | -289.0 |  | yes |
| 30703 | -41.8 | -286.0 |  |     |



|       |       |        |                                                                                     |  |
|-------|-------|--------|-------------------------------------------------------------------------------------|--|
| 28479 | -41.2 | -283.0 | 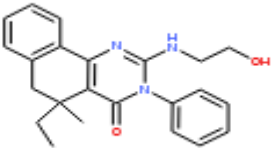   |  |
| 27177 | -24.1 | -278.0 |    |  |
| 27883 | -28.3 | -277.0 |    |  |
| 38629 | -26.1 | -277.0 |   |  |
| 25183 | -35.9 | -276.0 |  |  |
| 28477 | -40.5 | -276.0 |  |  |
| 32548 | -39.1 | -265.0 |  |  |

|        |       |        |                                                                                     |     |
|--------|-------|--------|-------------------------------------------------------------------------------------|-----|
| 100450 | -49.9 | -262.0 | 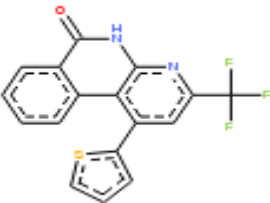   |     |
| 27881  | -27.0 | -259.0 |    |     |
| 31259  | -32.9 | -257.0 |    |     |
| 36373  | -20.4 | -256.0 |   |     |
| 35925  | -20.2 | -255.0 |  | yes |
| 36418  | -20.0 | -248.0 |  |     |
| 35904  | -19.6 | -245.0 |  |     |

|       |       |        |                                                                                     |  |
|-------|-------|--------|-------------------------------------------------------------------------------------|--|
| 27179 | -21.9 | -244.0 | 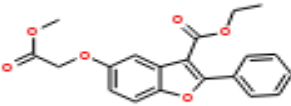   |  |
| 33238 | -22.4 | -244.0 |    |  |
| 29854 | -37.9 | -242.0 |    |  |
| 39467 | -38.5 | -234.0 |   |  |
| 24909 | -30.7 | -232.0 |  |  |
| 28749 | -35.0 | -226.0 |  |  |
| 31418 | -27.7 | -225.0 |  |  |

|       |       |        |                                                                                     |  |  |
|-------|-------|--------|-------------------------------------------------------------------------------------|--|--|
| 27501 | -23.5 | -218.0 | 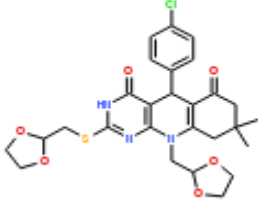   |  |  |
| 36134 | -18.0 | -217.0 |    |  |  |
| 33892 | -24.0 | -216.0 |    |  |  |
| 31517 | -26.6 | -212.0 |   |  |  |
| 27523 | -23.0 | -210.0 |  |  |  |
| 37129 | -20.0 | -204.0 |  |  |  |
| 31476 | -25.7 | -202.0 |  |  |  |

|       |       |        |                                                                                     |     |
|-------|-------|--------|-------------------------------------------------------------------------------------|-----|
| 25335 | -34.7 | -199.0 | 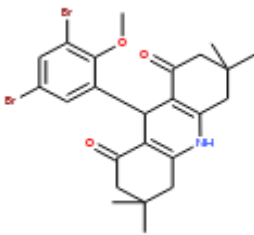   |     |
| 28698 | -31.4 | -193.0 |    |     |
| 36332 | -16.7 | -192.0 |    |     |
| 26901 | -18.9 | -190.0 |   | yes |
| 35867 | -16.4 | -189.0 |  | yes |
| 36654 | -18.4 | -189.0 |  |     |
| 37406 | -17.6 | -189.0 |  |     |

|       |       |        |                                                                                     |     |
|-------|-------|--------|-------------------------------------------------------------------------------------|-----|
| 30107 | -31.1 | -188.0 | 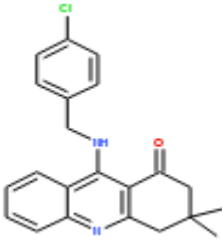   |     |
| 36760 | -17.9 | -183.0 |    |     |
| 30814 | -30.4 | -182.0 |    |     |
| 32399 | -30.0 | -181.0 |   |     |
| 34738 | -21.2 | -180.0 |  |     |
| 24526 | -25.6 | -178.0 |  | yes |
| 24843 | -25.6 | -178.0 |  |     |

|       |       |        |                                                                                     |     |
|-------|-------|--------|-------------------------------------------------------------------------------------|-----|
| 26888 | -17.9 | -175.0 | 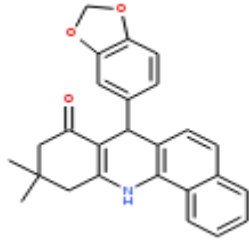   |     |
| 28194 | -23.5 | -170.0 |    |     |
| 33240 | -17.5 | -170.0 |    |     |
| 31359 | -22.9 | -169.0 |   | yes |
| 34937 | -18.4 | -169.0 |  |     |
| 28779 | -28.3 | -165.0 |  |     |
| 26572 | -33.3 | -158.0 |  |     |

|       |       |        |                                                                                     |     |
|-------|-------|--------|-------------------------------------------------------------------------------------|-----|
| 29850 | -28.5 | -158.0 | 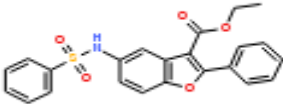   |     |
| 36674 | -16.2 | -156.0 |    |     |
| 31885 | -22.1 | -155.0 |    |     |
| 38324 | -17.6 | -155.0 |   |     |
| 24070 | -22.9 | -154.0 |  |     |
| 31324 | -21.6 | -154.0 |  |     |
| 30085 | -26.7 | -149.0 |  | yes |



|        |       |        |                                                                                     |  |
|--------|-------|--------|-------------------------------------------------------------------------------------|--|
| 35998  | -13.8 | -144.0 | 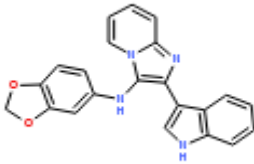   |  |
| 101117 | -23.1 | -132.0 |    |  |
| 39461  | -26.4 | -130.0 |    |  |
| 31238  | -20.9 | -128.0 |   |  |
| 32363  | -24.0 | -127.0 |  |  |
| 33809  | -16.9 | -124.0 |  |  |
| 38438  | -15.5 | -124.0 |  |  |

|        |       |        |                                                                                     |     |
|--------|-------|--------|-------------------------------------------------------------------------------------|-----|
| 102153 | -29.8 | -124.0 | 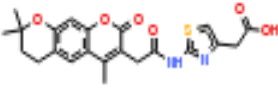   |     |
| 31430  | -18.7 | -121.0 |    |     |
| 25329  | -25.2 | -120.0 |    | yes |
| 34892  | -15.0 | -120.0 |   |     |
| 27704  | -15.9 | -116.0 |  |     |
| 30063  | -23.0 | -115.0 |  | yes |
| 31204  | -19.7 | -115.0 |  |     |

|        |       |        |                                                                                     |  |
|--------|-------|--------|-------------------------------------------------------------------------------------|--|
| 24371  | -19.5 | -113.0 | 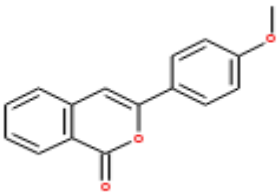   |  |
| 38651  | -14.6 | -112.0 |    |  |
| 27399  | -15.5 | -111.0 |    |  |
| 34551  | -15.8 | -111.0 |   |  |
| 101125 | -21.0 | -111.0 |  |  |
| 29856  | -23.2 | -110.0 |  |  |
| 24034  | -18.5 | -106.0 |  |  |

|       |       |        |                                                                                     |     |
|-------|-------|--------|-------------------------------------------------------------------------------------|-----|
| 35913 | -11.6 | -106.0 | 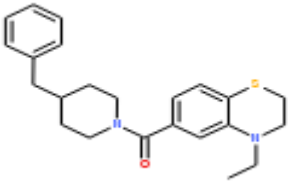   |     |
| 28137 | -17.8 | -104.0 |    |     |
| 38028 | -14.2 | -101.0 |    |     |
| 36502 | -11.2 | -99.0  |   |     |
| 30986 | -18.1 | -98.0  |  |     |
| 25792 | -23.4 | -96.0  |  | yes |
| 35909 | -11.0 | -96.0  |  | yes |

|       |       |       |                                                                                     |     |
|-------|-------|-------|-------------------------------------------------------------------------------------|-----|
| 30052 | -20.8 | -95.0 | 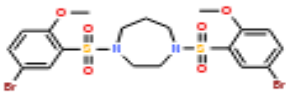   |     |
| 39463 | -22.4 | -95.0 |    |     |
| 38649 | -13.4 | -94.0 |    |     |
| 30833 | -20.5 | -93.0 |   |     |
| 27608 | -14.0 | -92.0 |  |     |
| 31530 | -16.2 | -92.0 |  |     |
| 36538 | -10.8 | -92.0 |  | yes |

|       |       |       |                                                                                     |  |
|-------|-------|-------|-------------------------------------------------------------------------------------|--|
| 32751 | -19.5 | -91.0 | 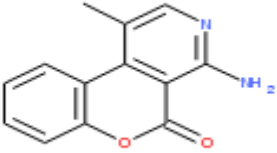   |  |
| 30022 | -20.2 | -90.0 |    |  |
| 36263 | -10.6 | -88.0 |    |  |
| 36267 | -10.5 | -87.0 |  |  |
| 36415 | -10.5 | -87.0 |  |  |
| 24405 | -16.9 | -86.0 |  |  |
| 30721 | -19.7 | -86.0 |  |  |

|        |       |       |                                                                                     |     |
|--------|-------|-------|-------------------------------------------------------------------------------------|-----|
| 31882  | -15.9 | -86.0 | 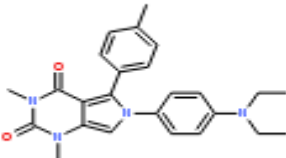   |     |
| 38387  | -12.8 | -85.0 |    |     |
| 26570  | -23.5 | -84.0 |    |     |
| 101188 | -18.2 | -83.0 |   |     |
| 102136 | -24.3 | -83.0 |  |     |
| 34713  | -13.6 | -82.0 |  |     |
| 36540  | -10.2 | -82.0 |  | yes |

|        |       |       |                                                                                     |     |
|--------|-------|-------|-------------------------------------------------------------------------------------|-----|
| 38355  | -12.6 | -82.0 | 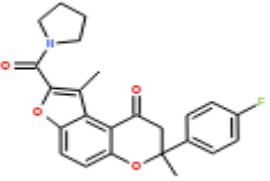   | yes |
| 37846  | -13.3 | -78.0 |    |     |
| 31752  | -15.1 | -77.0 |    |     |
| 40186  | -20.8 | -77.0 |   |     |
| 35917  | -9.8  | -76.0 |  |     |
| 101109 | -17.5 | -76.0 |  |     |
| 39501  | -20.0 | -75.0 |  |     |



|       |       |       |                                                                                     |     |
|-------|-------|-------|-------------------------------------------------------------------------------------|-----|
| 35905 | -9.8  | -74.0 | 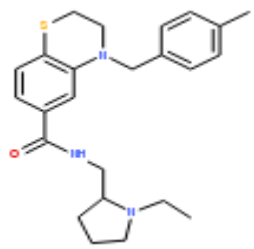   | yes |
| 35937 | -9.5  | -70.0 |    |     |
| 37165 | -11.0 | -69.0 |    |     |
| 29966 | -17.7 | -68.0 |   |     |
| 32593 | -17.6 | -68.0 |  |     |
| 32988 | -17.1 | -68.0 |  |     |
| 34297 | -12.7 | -68.0 |  |     |

|       |       |       |                                                                                     |     |
|-------|-------|-------|-------------------------------------------------------------------------------------|-----|
| 36890 | -10.5 | -66.0 | 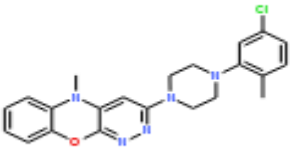   |     |
| 36500 | -9.2  | -64.0 |    |     |
| 36405 | -9.1  | -63.0 |    |     |
| 38030 | -11.4 | -63.0 |   |     |
| 30083 | -17.1 | -62.0 |  | yes |
| 23953 | -14.4 | -61.0 |  |     |
| 36181 | -9.0  | -61.0 |  | yes |

|       |       |       |                                                                                     |  |  |
|-------|-------|-------|-------------------------------------------------------------------------------------|--|--|
| 36026 | -8.9  | -60.0 | 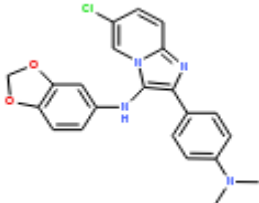   |  |  |
| 31142 | -14.5 | -59.0 |    |  |  |
| 25950 | -18.6 | -57.0 |    |  |  |
| 29052 | -14.2 | -57.0 |   |  |  |
| 36480 | -8.7  | -56.0 |  |  |  |
| 26619 | -19.5 | -54.0 |  |  |  |
| 27584 | -11.2 | -54.0 |  |  |  |

|       |       |       |                                                                                     |     |
|-------|-------|-------|-------------------------------------------------------------------------------------|-----|
| 31505 | -12.8 | -54.0 | 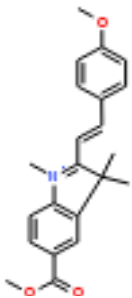   |     |
| 26571 | -19.4 | -53.0 |    |     |
| 26897 | -9.6  | -53.0 |    | yes |
| 27855 | -11.1 | -53.0 |   |     |
| 28719 | -16.1 | -53.0 |  |     |
| 26920 | -9.6  | -52.0 |  |     |
| 29916 | -16.0 | -52.0 |  |     |

|        |       |       |                                                                                     |  |
|--------|-------|-------|-------------------------------------------------------------------------------------|--|
| 102243 | -20.3 | -52.0 | 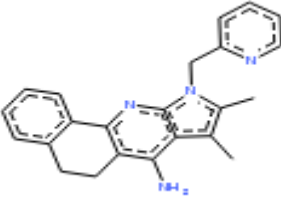   |  |
| 26623  | -19.1 | -51.0 |    |  |
| 26758  | -9.3  | -48.0 |    |  |
| 30198  | -15.2 | -45.0 |   |  |
| 33209  | -9.2  | -44.0 |  |  |
| 29939  | -15.0 | -43.0 |  |  |
| 36498  | -7.8  | -42.0 |  |  |

|       |       |       |                                                                                     |     |
|-------|-------|-------|-------------------------------------------------------------------------------------|-----|
| 28668 | -14.6 | -39.0 | 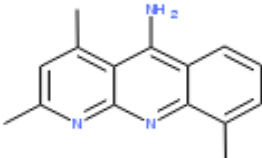   |     |
| 31892 | -11.8 | -39.0 |    | yes |
| 35895 | -7.7  | -39.0 |    | yes |
| 24911 | -12.5 | -38.0 |   |     |
| 36051 | -7.7  | -38.0 |  | yes |
| 31738 | -11.6 | -37.0 |  |     |
| 34288 | -10.2 | -37.0 |  |     |

|        |       |       |                                                                                     |     |
|--------|-------|-------|-------------------------------------------------------------------------------------|-----|
| 24522  | -12.2 | -35.0 | 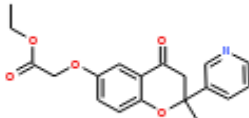   |     |
| 31138  | -12.2 | -34.0 |    |     |
| 34861  | -9.1  | -34.0 |    |     |
| 36532  | -7.4  | -34.0 |  |     |
| 38331  | -9.3  | -34.0 |  | yes |
| 101699 | -15.2 | -34.0 |  |     |
| 27998  | -9.6  | -33.0 |  |     |

|        |       |       |                                                                                     |     |
|--------|-------|-------|-------------------------------------------------------------------------------------|-----|
| 35891  | -7.4  | -33.0 | 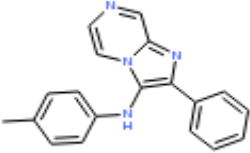   | yes |
| 26909  | -8.2  | -32.0 |    | yes |
| 27209  | -8.2  | -32.0 |    |     |
| 26464  | -16.5 | -31.0 |   |     |
| 33184  | -8.1  | -28.0 |  |     |
| 30782  | -13.2 | -27.0 |  |     |
| 101344 | -12.5 | -25.0 |  | yes |



|        |       |       |                                                                                     |  |  |
|--------|-------|-------|-------------------------------------------------------------------------------------|--|--|
| 101544 | -14.3 | -25.0 | 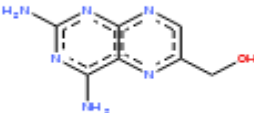   |  |  |
| 26568  | -15.6 | -24.0 |    |  |  |
| 39036  | -15.0 | -24.0 |    |  |  |
| 27335  | -7.7  | -23.0 |   |  |  |
| 28543  | -12.7 | -22.0 |  |  |  |
| 35486  | -8.1  | -22.0 |  |  |  |
| 27521  | -8.7  | -21.0 |  |  |  |

|        |       |       |                                                                                     |     |
|--------|-------|-------|-------------------------------------------------------------------------------------|-----|
| 25365  | -13.3 | -20.0 | 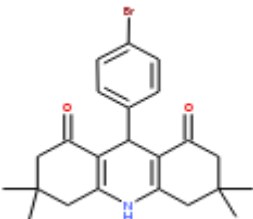   | yes |
| 30056  | -12.4 | -20.0 |    |     |
| 28664  | -12.4 | -19.0 |    |     |
| 35047  | -8.0  | -18.0 |   |     |
| 38389  | -8.0  | -16.0 |  |     |
| 101616 | -13.2 | -16.0 |  | yes |
| 36478  | -6.3  | -15.0 |  |     |

|        |       |       |                                                                                     |  |  |
|--------|-------|-------|-------------------------------------------------------------------------------------|--|--|
| 34907  | -7.7  | -14.0 | 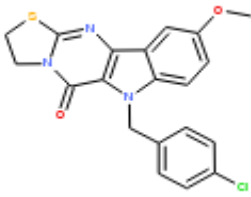   |  |  |
| 36403  | -6.2  | -14.0 |    |  |  |
| 100452 | -15.5 | -14.0 |    |  |  |
| 102118 | -15.1 | -14.0 |   |  |  |
| 28125  | -10.0 | -13.0 |  |  |  |
| 35348  | -7.5  | -13.0 |  |  |  |
| 36280  | -6.2  | -13.0 |  |  |  |

|        |       |       |                                                                                     |     |
|--------|-------|-------|-------------------------------------------------------------------------------------|-----|
| 38060  | -7.9  | -13.0 | 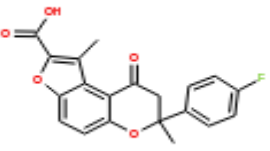   | yes |
| 35871  | -6.1  | -11.0 |    | yes |
| 37952  | -8.4  | -11.0 |    |     |
| 101643 | -12.6 | -11.0 |   |     |
| 31413  | -9.0  | -9.0  |  | yes |
| 32995  | -10.9 | -8.0  |  |     |
| 34592  | -7.9  | -8.0  |  |     |

|        |       |      |                                                                                     |     |
|--------|-------|------|-------------------------------------------------------------------------------------|-----|
| 36534  | -5.9  | -8.0 | 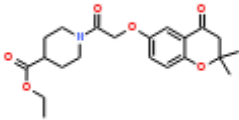   | yes |
| 36848  | -6.6  | -7.0 |    |     |
| 35614  | -6.8  | -6.0 |    |     |
| 35885  | -5.8  | -6.0 |   |     |
| 100587 | -14.3 | -6.0 |  |     |
| 29217  | -11.1 | -5.0 |  |     |
| 33136  | -6.6  | -5.0 |  |     |

|       |       |      |                                                                                     |     |
|-------|-------|------|-------------------------------------------------------------------------------------|-----|
| 31764 | -8.6  | -4.0 | 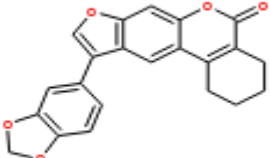   | yes |
| 26526 | -12.8 | -3.0 |    |     |
| 35518 | -6.6  | -3.0 |    |     |
| 36024 | -5.7  | -3.0 |   |     |
| 26494 | -12.7 | -2.0 |  |     |
| 38357 | -7.0  | -2.0 |  | yes |
| 24190 | -8.8  | -1.0 |  |     |

|       |       |      |                                                                                     |     |
|-------|-------|------|-------------------------------------------------------------------------------------|-----|
| 38322 | -6.9  | -1.0 | 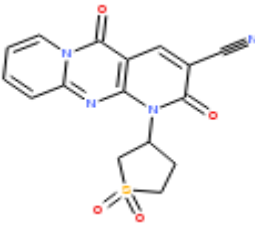   |     |
| 35820 | -6.4  | 0.0  |    | yes |
| 36083 | -5.4  | 0.0  |    | yes |
| 31864 | -8.2  | 1.0  |   | yes |
| 34724 | -7.2  | 1.0  |  |     |
| 25603 | -10.7 | 2.0  |  | yes |
| 33753 | -7.1  | 2.0  |  |     |

|        |       |     |                                                                                     |     |
|--------|-------|-----|-------------------------------------------------------------------------------------|-----|
| 102347 | -13.0 | 2.0 |    |     |
| 34714  | -7.1  | 3.0 |    | yes |
| 36521  | -5.2  | 3.0 |    | yes |
| 100939 | -12.1 | 3.0 |   | yes |
| 24552  | -8.5  | 4.0 |  | yes |
| 35707  | -6.1  | 4.0 |  | yes |
| 26911  | -5.6  | 5.0 |  | yes |



|        |       |     |                                                                                     |     |
|--------|-------|-----|-------------------------------------------------------------------------------------|-----|
| 31451  | -7.7  | 5.0 | 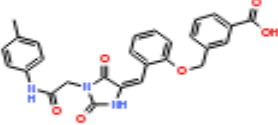   | yes |
| 101291 | -9.5  | 5.0 |    | yes |
| 25820  | -11.1 | 6.0 |    | yes |
| 25657  | -10.9 | 7.0 |   | yes |
| 30927  | -8.3  | 7.0 |  | yes |
| 25369  | -10.0 | 8.0 |  | yes |
| 36361  | -4.9  | 8.0 |  | yes |

|       |      |      |                                                                                     |     |
|-------|------|------|-------------------------------------------------------------------------------------|-----|
| 38248 | -6.4 | 8.0  | 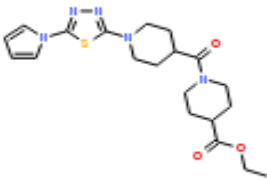   | yes |
| 27270 | -5.6 | 9.0  |    | yes |
| 29961 | -9.3 | 9.0  |    | yes |
| 29582 | -9.8 | 10.0 |   | yes |
| 30061 | -9.2 | 10.0 |  | yes |
| 35907 | -4.8 | 11.0 |  | yes |
| 38361 | -6.1 | 11.0 |  | yes |

|       |      |      |                                                                                     |     |
|-------|------|------|-------------------------------------------------------------------------------------|-----|
| 34168 | -6.3 | 12.0 | 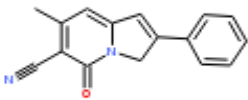   |     |
| 30843 | -8.8 | 13.0 |    |     |
| 36506 | -4.6 | 13.0 |    | yes |
| 38073 | -6.0 | 13.0 |   | yes |
| 27341 | -5.3 | 14.0 |  |     |
| 28162 | -7.6 | 14.0 |  |     |
| 28569 | -8.8 | 14.0 |  |     |

|       |      |      |                                                                                     |     |
|-------|------|------|-------------------------------------------------------------------------------------|-----|
| 29003 | -7.7 | 14.0 | 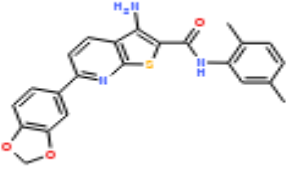   |     |
| 33847 | -6.2 | 14.0 |    |     |
| 35555 | -5.5 | 14.0 |    |     |
| 36987 | -5.4 | 15.0 |   |     |
| 25835 | -9.8 | 16.0 |  |     |
| 29051 | -7.5 | 16.0 |  |     |
| 29199 | -8.7 | 16.0 |  | yes |

|       |      |      |                                                                                     |  |
|-------|------|------|-------------------------------------------------------------------------------------|--|
| 34112 | -6.0 | 16.0 | 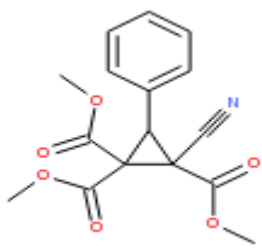   |  |
| 37942 | -6.4 | 16.0 |    |  |
| 24407 | -7.2 | 17.0 |    |  |
| 33815 | -6.0 | 17.0 |   |  |
| 24645 | -7.2 | 18.0 |  |  |
| 30199 | -8.2 | 18.0 |  |  |
| 36295 | -4.4 | 18.0 |  |  |

|       |      |      |                                                                                     |  |
|-------|------|------|-------------------------------------------------------------------------------------|--|
| 27317 | -4.9 | 19.0 | 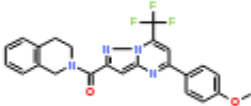   |  |
| 33202 | -5.0 | 19.0 |    |  |
| 38056 | -5.6 | 19.0 |    |  |
| 39127 | -9.7 | 19.0 |   |  |
| 26754 | -4.7 | 20.0 |  |  |
| 30054 | -8.1 | 20.0 |  |  |
| 30197 | -8.0 | 20.0 |  |  |

|       |      |      |                                                                                     |     |
|-------|------|------|-------------------------------------------------------------------------------------|-----|
| 36762 | -4.8 | 21.0 | 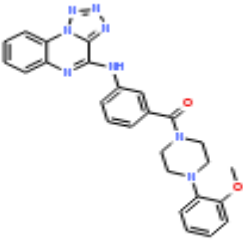   |     |
| 28029 | -5.4 | 22.0 |    | yes |
| 28666 | -7.8 | 22.0 |    |     |
| 26828 | -4.4 | 23.0 |   | yes |
| 27203 | -4.6 | 23.0 |  | yes |
| 33291 | -4.7 | 23.0 |  |     |
| 35883 | -4.1 | 23.0 |  |     |

|       |      |      |                                                                                     |     |
|-------|------|------|-------------------------------------------------------------------------------------|-----|
| 36542 | -4.1 | 23.0 | 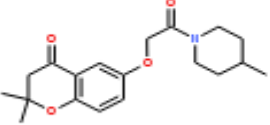   | yes |
| 36874 | -4.7 | 23.0 |    |     |
| 37698 | -5.9 | 23.0 |    |     |
| 38989 | -9.4 | 23.0 |   |     |
| 26620 | -9.2 | 24.0 |  |     |
| 27681 | -5.3 | 24.0 |  |     |
| 36125 | -4.1 | 24.0 |  | yes |



|       |      |      |                                                                                     |     |
|-------|------|------|-------------------------------------------------------------------------------------|-----|
| 36284 | -4.0 | 24.0 | 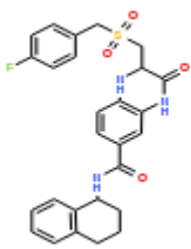   |     |
| 36676 | -4.7 | 24.0 |    |     |
| 38062 | -5.2 | 24.0 |    | yes |
| 27559 | -5.2 | 25.0 |   |     |
| 38520 | -5.2 | 25.0 |  |     |
| 39639 | -8.3 | 25.0 |  |     |
| 30207 | -7.4 | 26.0 |  |     |

|       |      |      |                                                                                     |     |
|-------|------|------|-------------------------------------------------------------------------------------|-----|
| 36021 | -4.0 | 26.0 | 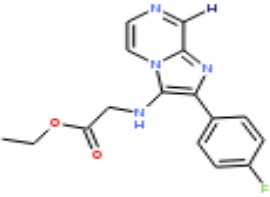   | yes |
| 38327 | -5.1 | 26.0 |    | yes |
| 33390 | -5.1 | 27.0 |    |     |
| 38715 | -8.9 | 27.0 |   |     |
| 30682 | -7.2 | 28.0 |  |     |
| 31588 | -5.7 | 28.0 |  |     |
| 33931 | -5.1 | 28.0 |  |     |

|       |      |      |                                                                                     |     |
|-------|------|------|-------------------------------------------------------------------------------------|-----|
| 34900 | -4.8 | 28.0 | 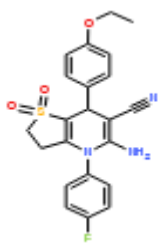   |     |
| 35099 | -4.9 | 28.0 |    |     |
| 38683 | -8.8 | 28.0 |    | yes |
| 25071 | -6.6 | 29.0 |   |     |
| 31756 | -5.7 | 29.0 |  |     |
| 35504 | -4.4 | 29.0 |  |     |
| 37674 | -5.4 | 29.0 |  |     |

|       |      |      |                                                                                     |     |
|-------|------|------|-------------------------------------------------------------------------------------|-----|
| 24206 | -5.9 | 30.0 | 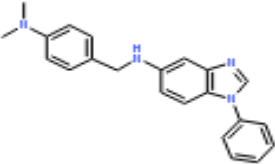   |     |
| 28968 | -6.2 | 30.0 |    |     |
| 31063 | -6.2 | 30.0 |    |     |
| 31802 | -5.6 | 30.0 |   | yes |
| 35520 | -4.3 | 30.0 |  |     |
| 24694 | -6.0 | 31.0 |  |     |
| 39523 | -7.7 | 31.0 |  |     |

|       |      |      |                                                                                     |  |  |
|-------|------|------|-------------------------------------------------------------------------------------|--|--|
| 24717 | -5.9 | 32.0 | 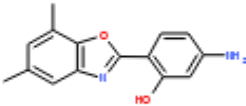   |  |  |
| 27311 | -4.1 | 32.0 |    |  |  |
| 35582 | -4.2 | 32.0 |    |  |  |
| 33211 | -4.1 | 33.0 |   |  |  |
| 33444 | -4.7 | 33.0 |  |  |  |
| 33760 | -4.8 | 33.0 |  |  |  |
| 24664 | -5.8 | 34.0 |  |  |  |

|       |      |      |                                                                                     |     |
|-------|------|------|-------------------------------------------------------------------------------------|-----|
| 30936 | -5.8 | 34.0 | 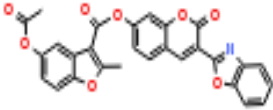   |     |
| 35415 | -4.3 | 34.0 |    |     |
| 38359 | -4.5 | 34.0 |    | yes |
| 39188 | -7.9 | 34.0 |   |     |
| 24422 | -5.5 | 35.0 |  | yes |
| 27419 | -4.4 | 35.0 |  |     |
| 35278 | -4.3 | 35.0 |  |     |

|       |      |      |                                                                                     |     |
|-------|------|------|-------------------------------------------------------------------------------------|-----|
| 35503 | -3.9 | 35.0 | 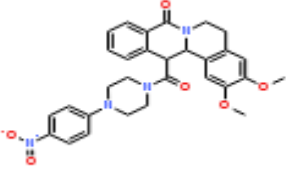   |     |
| 36919 | -4.0 | 35.0 |    |     |
| 35326 | -4.2 | 36.0 |    |     |
| 35751 | -3.9 | 36.0 |   |     |
| 35985 | -3.4 | 36.0 |  | yes |
| 24593 | -5.4 | 37.0 |  |     |
| 27376 | -3.8 | 37.0 |  |     |

|       |      |      |                                                                                     |  |
|-------|------|------|-------------------------------------------------------------------------------------|--|
| 27905 | -4.2 | 37.0 | 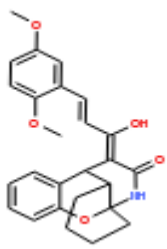   |  |
| 29937 | -6.1 | 37.0 |    |  |
| 36837 | -3.8 | 37.0 |    |  |
| 27867 | -4.1 | 38.0 |   |  |
| 29413 | -6.2 | 38.0 |  |  |
| 31762 | -4.9 | 38.0 |  |  |
| 33076 | -3.8 | 38.0 |  |  |



|        |      |      |                                                                                     |     |
|--------|------|------|-------------------------------------------------------------------------------------|-----|
| 36219  | -3.2 | 38.0 | 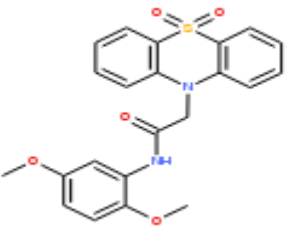   | yes |
| 38039  | -4.2 | 38.0 |    | yes |
| 38156  | -4.3 | 38.0 |    |     |
| 100455 | -8.2 | 38.0 |   |     |
| 29880  | -6.0 | 39.0 |  |     |
| 31047  | -5.3 | 39.0 |  |     |
| 31106  | -5.4 | 39.0 |  |     |

|        |      |      |                                                                                     |     |
|--------|------|------|-------------------------------------------------------------------------------------|-----|
| 31573  | -4.8 | 39.0 | 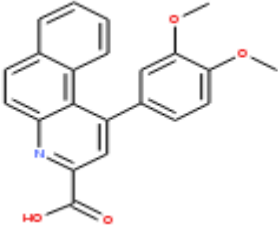   |     |
| 33055  | -3.7 | 39.0 |    |     |
| 35466  | -4.0 | 39.0 |    |     |
| 35957  | -3.2 | 39.0 |   | yes |
| 100655 | -8.1 | 39.0 |  |     |
| 26598  | -7.1 | 40.0 |  |     |
| 27359  | -3.6 | 40.0 |  |     |

|       |      |      |                                                                                     |     |
|-------|------|------|-------------------------------------------------------------------------------------|-----|
| 31487 | -4.7 | 40.0 | 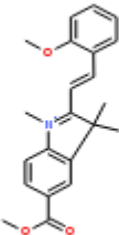   | yes |
| 32804 | -6.0 | 40.0 |    |     |
| 30854 | -5.6 | 41.0 |    |     |
| 38725 | -7.1 | 41.0 |  |     |
| 40184 | -6.7 | 41.0 |  |     |
| 27971 | -3.8 | 42.0 |  |     |
| 33447 | -4.1 | 42.0 |  |     |

|       |      |      |                                                                                     |     |
|-------|------|------|-------------------------------------------------------------------------------------|-----|
| 35045 | -3.9 | 42.0 | 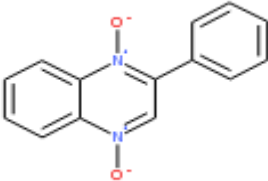   |     |
| 35152 | -3.8 | 42.0 |    |     |
| 35857 | -3.0 | 42.0 |    | yes |
| 36921 | -3.5 | 42.0 |   |     |
| 37348 | -3.6 | 42.0 |  |     |
| 37804 | -4.4 | 42.0 |  |     |
| 38737 | -7.0 | 42.0 |  |     |

|        |      |      |                                                                                     |  |
|--------|------|------|-------------------------------------------------------------------------------------|--|
| 101552 | -6.7 | 42.0 | 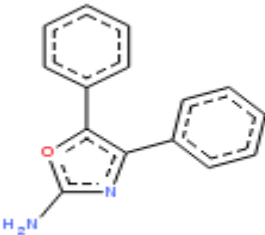   |  |
| 25139  | -5.3 | 43.0 |    |  |
| 26877  | -3.0 | 43.0 |    |  |
| 33118  | -3.5 | 43.0 |   |  |
| 35641  | -3.4 | 43.0 |  |  |
| 35735  | -3.4 | 43.0 |  |  |
| 36714  | -3.4 | 43.0 |  |  |

|        |      |      |                                                                                     |     |
|--------|------|------|-------------------------------------------------------------------------------------|-----|
| 36815  | -3.4 | 43.0 | 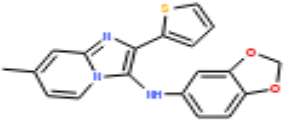   |     |
| 101101 | -5.7 | 43.0 |    |     |
| 29411  | -5.6 | 44.0 |    |     |
| 29938  | -5.4 | 44.0 |   |     |
| 30025  | -5.3 | 44.0 |  |     |
| 31391  | -4.3 | 44.0 |  | yes |
| 31420  | -4.4 | 44.0 |  |     |

|        |      |      |                                                                                     |  |
|--------|------|------|-------------------------------------------------------------------------------------|--|
| 35502  | -3.3 | 44.0 | 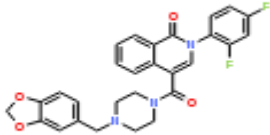   |  |
| 36718  | -3.4 | 44.0 |    |  |
| 36909  | -3.4 | 44.0 |    |  |
| 101694 | -6.4 | 44.0 |  |  |
| 27517  | -3.6 | 45.0 |  |  |
| 27645  | -3.7 | 45.0 |  |  |
| 33594  | -3.9 | 45.0 |  |  |

|       |      |      |                                                                                     |     |
|-------|------|------|-------------------------------------------------------------------------------------|-----|
| 34447 | -3.8 | 45.0 | 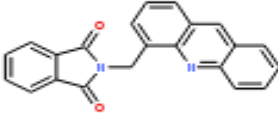   |     |
| 36576 | -3.3 | 45.0 |    |     |
| 40224 | -6.3 | 45.0 |    |     |
| 26609 | -6.3 | 46.0 |   |     |
| 27395 | -3.6 | 46.0 |  |     |
| 30734 | -5.1 | 46.0 |  |     |
| 31770 | -4.2 | 46.0 |  | yes |



|        |      |      |                                                                                     |     |
|--------|------|------|-------------------------------------------------------------------------------------|-----|
| 33759  | -3.8 | 46.0 | 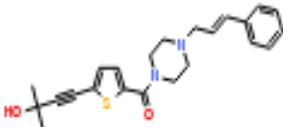   |     |
| 34095  | -3.6 | 46.0 |    |     |
| 34464  | -3.7 | 46.0 |    |     |
| 35164  | -3.6 | 46.0 |   |     |
| 101586 | -6.3 | 46.0 |  |     |
| 27183  | -3.1 | 47.0 |  | yes |
| 27233  | -3.1 | 47.0 |  | yes |

|       |      |      |                                                                                     |  |
|-------|------|------|-------------------------------------------------------------------------------------|--|
| 27823 | -3.5 | 47.0 | 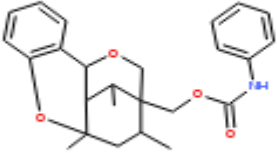   |  |
| 32557 | -5.1 | 47.0 |    |  |
| 34187 | -3.6 | 47.0 |    |  |
| 35515 | -3.1 | 47.0 |   |  |
| 37248 | -3.2 | 47.0 |  |  |
| 37322 | -3.3 | 47.0 |  |  |
| 38337 | -3.6 | 47.0 |  |  |

|       |      |      |                                                                                     |  |
|-------|------|------|-------------------------------------------------------------------------------------|--|
| 27391 | -3.1 | 48.0 | 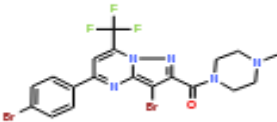   |  |
| 30656 | -4.9 | 48.0 |    |  |
| 37949 | -4.0 | 48.0 |    |  |
| 39433 | -5.7 | 48.0 |   |  |
| 23898 | -4.2 | 49.0 |  |  |
| 24066 | -4.2 | 49.0 |  |  |
| 24698 | -4.3 | 49.0 |  |  |

|       |      |      |                                                                                     |  |
|-------|------|------|-------------------------------------------------------------------------------------|--|
| 27463 | -3.4 | 49.0 | 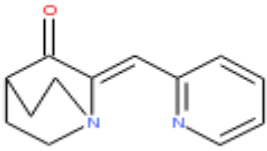   |  |
| 27834 | -3.3 | 49.0 |    |  |
| 27900 | -3.3 | 49.0 |    |  |
| 30194 | -4.8 | 49.0 |   |  |
| 31116 | -4.4 | 49.0 |  |  |
| 31657 | -3.9 | 49.0 |  |  |
| 31899 | -3.9 | 49.0 |  |  |

|       |      |      |                                                                                     |     |
|-------|------|------|-------------------------------------------------------------------------------------|-----|
| 33776 | -3.6 | 49.0 | 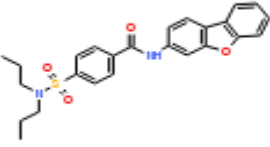   |     |
| 35408 | -3.4 | 49.0 |    |     |
| 37133 | -3.1 | 49.0 |    |     |
| 37878 | -4.0 | 49.0 |   |     |
| 38679 | -6.1 | 49.0 |  |     |
| 39547 | -5.5 | 49.0 |  | yes |
| 27519 | -3.3 | 50.0 |  | yes |

|       |      |      |                                                                                     |  |
|-------|------|------|-------------------------------------------------------------------------------------|--|
| 27636 | -3.3 | 50.0 | 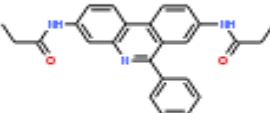   |  |
| 32000 | -4.5 | 50.0 |    |  |
| 32121 | -4.6 | 50.0 |    |  |
| 34448 | -3.4 | 50.0 |   |  |
| 34800 | -3.3 | 50.0 |  |  |
| 35391 | -3.3 | 50.0 |  |  |
| 38685 | -6.0 | 50.0 |  |  |

|       |      |      |                                                                                     |     |
|-------|------|------|-------------------------------------------------------------------------------------|-----|
| 24381 | -4.1 | 51.0 | 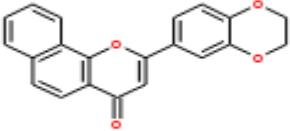   |     |
| 25423 | -5.0 | 51.0 |    |     |
| 28670 | -4.7 | 51.0 |    |     |
| 38054 | -3.3 | 51.0 |   |     |
| 38208 | -3.3 | 51.0 |  |     |
| 38321 | -3.4 | 51.0 |  | yes |
| 38329 | -3.3 | 51.0 |  | yes |

|       |      |      |                                                                                     |  |
|-------|------|------|-------------------------------------------------------------------------------------|--|
| 27877 | -3.0 | 52.0 | 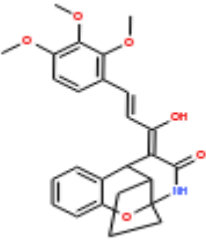   |  |
| 27911 | -3.1 | 52.0 |    |  |
| 28164 | -4.3 | 52.0 |    |  |
| 29081 | -4.2 | 52.0 |   |  |
| 29920 | -4.5 | 52.0 |  |  |
| 30392 | -4.7 | 52.0 |  |  |
| 34108 | -3.1 | 52.0 |  |  |



|       |      |      |                                                                                     |     |
|-------|------|------|-------------------------------------------------------------------------------------|-----|
| 34534 | -3.2 | 52.0 | 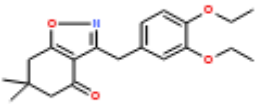   |     |
| 38333 | -3.3 | 52.0 |    | yes |
| 27580 | -3.1 | 53.0 |    |     |
| 28413 | -4.2 | 53.0 |   |     |
| 28747 | -4.5 | 53.0 |  |     |
| 31255 | -4.0 | 53.0 |  |     |
| 37704 | -3.6 | 53.0 |  |     |

|        |      |      |                                                                                     |  |
|--------|------|------|-------------------------------------------------------------------------------------|--|
| 38087  | -3.2 | 53.0 | 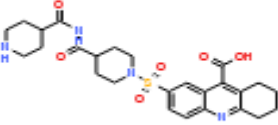   |  |
| 38092  | -3.2 | 53.0 |    |  |
| 38991  | -5.6 | 53.0 |    |  |
| 40274  | -5.3 | 53.0 |   |  |
| 100485 | -6.0 | 53.0 |  |  |
| 28391  | -4.2 | 54.0 |  |  |
| 29973  | -4.3 | 54.0 |  |  |

|       |      |      |                                                                                     |     |
|-------|------|------|-------------------------------------------------------------------------------------|-----|
| 31744 | -3.5 | 54.0 | 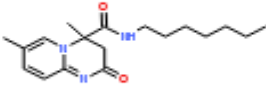   |     |
| 31988 | -4.1 | 54.0 |    |     |
| 32145 | -4.1 | 54.0 |    |     |
| 33023 | -4.7 | 54.0 |   |     |
| 34816 | -3.1 | 54.0 |  |     |
| 35305 | -3.0 | 54.0 |  |     |
| 38353 | -3.2 | 54.0 |  | yes |

|        |      |      |                                                                                     |  |  |
|--------|------|------|-------------------------------------------------------------------------------------|--|--|
| 38891  | -5.5 | 54.0 | 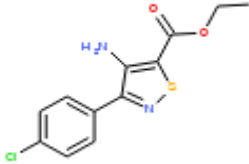   |  |  |
| 100416 | -6.0 | 54.0 |    |  |  |
| 30273  | -4.4 | 55.0 |    |  |  |
| 31426  | -3.4 | 55.0 |   |  |  |
| 31432  | -3.4 | 55.0 |  |  |  |
| 32352  | -4.3 | 55.0 |  |  |  |
| 33615  | -3.2 | 55.0 |  |  |  |

|       |      |      |                                                                                     |     |
|-------|------|------|-------------------------------------------------------------------------------------|-----|
| 33964 | -3.1 | 55.0 | 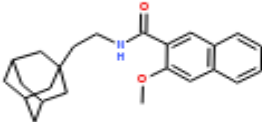   |     |
| 34506 | -3.0 | 55.0 |    |     |
| 34518 | -3.0 | 55.0 |    |     |
| 39469 | -4.9 | 55.0 |   |     |
| 25454 | -4.4 | 56.0 |  |     |
| 25571 | -4.4 | 56.0 |  | yes |
| 32302 | -3.9 | 56.0 |  |     |

|       |      |      |                                                                                     |     |
|-------|------|------|-------------------------------------------------------------------------------------|-----|
| 32550 | -4.1 | 56.0 | 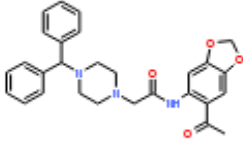   |     |
| 39525 | -4.7 | 56.0 |    |     |
| 40128 | -5.1 | 56.0 |    |     |
| 24032 | -3.5 | 57.0 |   |     |
| 25145 | -4.0 | 57.0 |  |     |
| 31046 | -3.7 | 57.0 |  |     |
| 32431 | -4.0 | 57.0 |  | yes |

|        |      |      |                                                                                     |  |
|--------|------|------|-------------------------------------------------------------------------------------|--|
| 33616  | -3.1 | 57.0 | 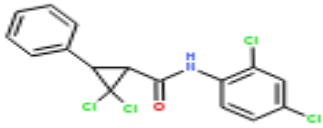   |  |
| 37632  | -3.3 | 57.0 |    |  |
| 37721  | -3.3 | 57.0 |    |  |
| 101029 | -4.9 | 57.0 |   |  |
| 101196 | -4.4 | 57.0 |  |  |
| 101319 | -4.3 | 57.0 |  |  |
| 23924  | -3.4 | 58.0 |  |  |

|       |      |      |                                                                                     |     |
|-------|------|------|-------------------------------------------------------------------------------------|-----|
| 24207 | -3.4 | 58.0 | 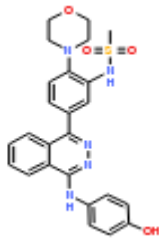   |     |
| 28704 | -3.9 | 58.0 |    |     |
| 29023 | -3.6 | 58.0 |    |     |
| 31835 | -3.1 | 58.0 |   |     |
| 38717 | -4.9 | 58.0 |  | yes |
| 39491 | -4.5 | 58.0 |  |     |
| 24409 | -3.4 | 59.0 |  |     |



|       |      |      |                                                                                     |  |
|-------|------|------|-------------------------------------------------------------------------------------|--|
| 25291 | -4.0 | 59.0 | 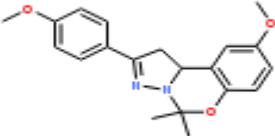   |  |
| 26116 | -4.7 | 59.0 |    |  |
| 28545 | -3.8 | 59.0 |   |  |
| 32356 | -3.8 | 59.0 |  |  |
| 25388 | -3.9 | 60.0 |  |  |
| 28549 | -3.7 | 60.0 |  |  |
| 29184 | -3.7 | 60.0 |  |  |

|        |      |      |                                                                                     |  |  |
|--------|------|------|-------------------------------------------------------------------------------------|--|--|
| 32810  | -4.0 | 60.0 | 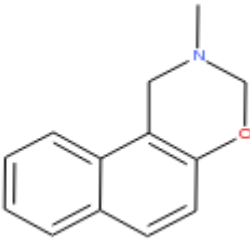   |  |  |
| 37622  | -3.1 | 60.0 |    |  |  |
| 38845  | -4.7 | 60.0 |    |  |  |
| 39457  | -4.3 | 60.0 |   |  |  |
| 100573 | -5.2 | 60.0 |  |  |  |
| 101092 | -4.1 | 60.0 |  |  |  |
| 24068  | -3.1 | 61.0 |  |  |  |

|       |      |      |                                                                                     |  |  |
|-------|------|------|-------------------------------------------------------------------------------------|--|--|
| 25090 | -3.5 | 61.0 | 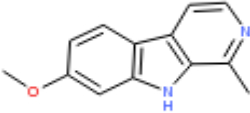   |  |  |
| 25803 | -4.4 | 61.0 |    |  |  |
| 30058 | -3.5 | 61.0 |    |  |  |
| 30608 | -3.5 | 61.0 |   |  |  |
| 31151 | -3.3 | 61.0 |  |  |  |
| 39535 | -4.1 | 61.0 |  |  |  |
| 25424 | -3.6 | 62.0 |  |  |  |

|       |      |      |                                                                                     |  |  |
|-------|------|------|-------------------------------------------------------------------------------------|--|--|
| 30027 | -3.4 | 62.0 | 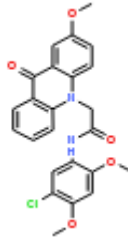   |  |  |
| 30745 | -3.4 | 62.0 |    |  |  |
| 32140 | -3.2 | 62.0 |    |  |  |
| 40246 | -4.3 | 62.0 |   |  |  |
| 26026 | -4.1 | 63.0 |  |  |  |
| 28678 | -3.4 | 63.0 |  |  |  |
| 30607 | -3.2 | 63.0 |  |  |  |

|       |      |      |                                                                                     |  |  |
|-------|------|------|-------------------------------------------------------------------------------------|--|--|
| 31994 | -3.0 | 63.0 | 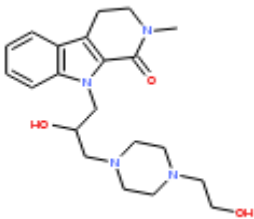   |  |  |
| 32521 | -3.4 | 63.0 |    |  |  |
| 32958 | -3.7 | 63.0 |    |  |  |
| 26613 | -3.8 | 64.0 |   |  |  |
| 30773 | -3.1 | 64.0 |  |  |  |
| 30876 | -3.1 | 64.0 |  |  |  |
| 30966 | -3.0 | 64.0 |  |  |  |

|        |      |      |                                                                                     |  |  |
|--------|------|------|-------------------------------------------------------------------------------------|--|--|
| 39495  | -3.9 | 64.0 | 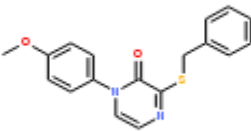   |  |  |
| 40250  | -4.1 | 64.0 |    |  |  |
| 101160 | -3.6 | 64.0 |    |  |  |
| 25441  | -3.2 | 65.0 |   |  |  |
| 26441  | -3.7 | 65.0 |  |  |  |
| 29075  | -3.0 | 65.0 |  |  |  |
| 29885  | -3.1 | 65.0 |  |  |  |

|       |      |      |                                                                                     |     |
|-------|------|------|-------------------------------------------------------------------------------------|-----|
| 30592 | -3.0 | 65.0 | 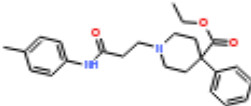   |     |
| 38677 | -4.0 | 65.0 |    | yes |
| 29385 | -3.1 | 66.0 |    |     |
| 30218 | -3.2 | 66.0 |   |     |
| 30515 | -3.2 | 66.0 |  |     |
| 32368 | -3.0 | 66.0 |  |     |
| 38977 | -3.9 | 66.0 |  |     |

|        |      |      |                                                                                     |  |  |
|--------|------|------|-------------------------------------------------------------------------------------|--|--|
| 29516  | -3.3 | 67.0 | 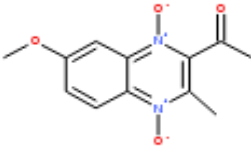   |  |  |
| 29610  | -3.4 | 67.0 |    |  |  |
| 101280 | -3.3 | 67.0 |    |  |  |
| 25646  | -3.5 | 68.0 |   |  |  |
| 32753  | -3.1 | 68.0 |  |  |  |
| 26560  | -3.0 | 70.0 |  |  |  |
| 38711  | -3.4 | 70.0 |  |  |  |



|        |      |      |                                                                                    |  |
|--------|------|------|------------------------------------------------------------------------------------|--|
| 40169  | -3.4 | 70.0 | 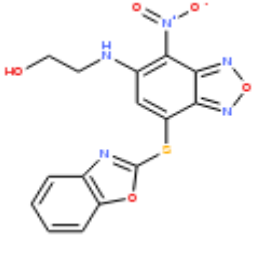  |  |
| 39007  | -3.3 | 71.0 |   |  |
| 100453 | -3.6 | 71.0 |   |  |
| 39164  | -3.0 | 73.0 |  |  |

## 1.2.2. Suppl. Tab. 2

| Comp_ID | z_score | ResidualPercentActivity | ClosestNames                                                                        | PNG_Image                                                                           | IC50_uM | IC50_comment                     | FitsValid |
|---------|---------|-------------------------|-------------------------------------------------------------------------------------|-------------------------------------------------------------------------------------|---------|----------------------------------|-----------|
| 24181   | 0.1     | 96.0                    | 24181,25337,25369,25371                                                             | 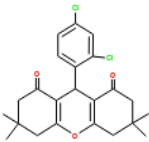   |         |                                  |           |
| 24422   | -5.5    | 35.0                    | 24422,101616,24552,24550,24528,24526,101618                                         |    | 30      |                                  | True      |
| 24526   | -25.6   | -178.0                  | 24526,101618,24552,101616,24550,24422                                               |    |         | artifact, fluorescence bleaching | True      |
| 24528   | -1.7    | 76.0                    | 24528,24422,24550,24552,101616                                                      |    |         |                                  |           |
| 24546   | -0.2    | 92.0                    | 24546                                                                               |   |         |                                  |           |
| 24550   | -1.4    | 79.0                    | 24550,24552,101616,24526,101618,24422,100617,101626,24528                           |  |         |                                  |           |
| 24552   | -8.5    | 4.0                     | 24552,101616,24526,101618,24550,24422,100617,101626,24528                           |  |         |                                  |           |
| 25309   | -2.1    | 75.0                    | 25309,31379,25329,25541,25613,25343,25543,25365,31381,39547                         |  |         |                                  |           |
| 25329   | -25.2   | -120.0                  | 25329,25541,25343,25365,25543,39547,30331,25309,25371,25369,25615,25613,31379,40220 |  |         |                                  |           |
| 25337   | 0.2     | 94.0                    | 25337,24181,25339,25361,25365,25363                                                 |  |         |                                  |           |
| 25339   | 1.5     | 105.0                   | 25339,25603,25575,25609,25337,25551,25607,34444,25363,30593                         |  |         |                                  |           |

|       |       |       |                                                                                                       |                                                                                     |  |  |  |
|-------|-------|-------|-------------------------------------------------------------------------------------------------------|-------------------------------------------------------------------------------------|--|--|--|
| 25341 | -2.0  | 75.0  | 25341                                                                                                 | 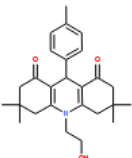   |  |  |  |
| 25343 |       |       | 25343,25329,25541,25365,25543,39547,30331,25309,25371,25369,25615,25613,31379                         |    |  |  |  |
| 25361 | -0.7  | 87.0  | 25361,25337                                                                                           |    |  |  |  |
| 25363 | 0.5   | 97.0  | 25363,25337,25339                                                                                     |    |  |  |  |
| 25365 | -13.3 | -20.0 | 25365,25369,25371,25329,25541,25343,25615,40220,25613,39547,25543,31379,30331,25337,25309,31381,28824 |    |  |  |  |
| 25369 | -10.0 | 8.0   | 25369,25371,25365,25329,25541,24181,25343,25615,40220,25613,39547,25543,31379                         |  |  |  |  |
| 25371 |       |       | 25371,25369,25365,25541,25329,25343,39547,25615,25613,40220,25543,31379,24181                         |  |  |  |  |
| 25541 |       |       | 25541,25329,25343,39547,25365,25543,25371,30331,25309,25369,25615,25613,31379,40220                   |  |  |  |  |
| 25543 |       |       | 25543,25329,25541,25343,25365,25309,39547,30331,25613,25371,25369,25615,31379                         |  |  |  |  |
| 25549 | -1.9  | 76.0  | 25549,25551,30593,25573,25569,25609,25603,25575,30575,25571                                           |  |  |  |  |
| 25551 | -1.6  | 79.0  | 25551,30593,25549,25573,25339,25609,25603,25575,30575,25569,25607,25605                               |  |  |  |  |

|       |       |       |                                                                               |                                                                                     |  |  |  |
|-------|-------|-------|-------------------------------------------------------------------------------|-------------------------------------------------------------------------------------|--|--|--|
| 25569 | -1.2  | 82.0  | 25569,25573,25571,30597,25549,30595,25551                                     | 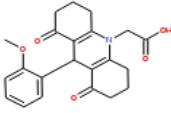   |  |  |  |
| 25571 | -4.4  | 56.0  | 25571,30597,25569,25573,25549                                                 |    |  |  |  |
| 25573 | -2.3  | 73.0  | 25573,25569,25549,25551,25571,30593,30595,30597                               |    |  |  |  |
| 25575 | 2.2   | 111.0 | 25575,25339,25603,25609,25551,30575,30593,25549,25607,25605                   |    |  |  |  |
| 25601 | 0.6   | 98.0  | 25601,25605,25607,30595                                                       |    |  |  |  |
| 25603 | -10.7 | 2.0   | 25603,25339,25609,25575,25605,31357,25607,25551,30593,25549                   |  |  |  |  |
| 25605 | 0.8   | 99.0  | 25605,25607,31357,25601,25603,25609,30593,25551,25575                         |  |  |  |  |
| 25607 | 0.3   | 94.0  | 25607,25605,25609,31357,25601,25603,25339,30593,25551,25575                   |  |  |  |  |
| 25609 | 0.3   | 95.0  | 25609,25603,30593,25339,25607,25575,25605,25551,25549,30575,31357,31359       |  |  |  |  |
| 25613 |       |       | 25613,31379,25365,25309,25615,25329,25371,25541,31381,25369,25343,25543,39547 |  |  |  |  |
| 25615 | -0.3  | 90.0  | 25615,31381,25365,25329,25541,25371,25613,25343,25369,31379,39547,25543       |  |  |  |  |

|       |       |       |                                           |                                                                                     |  |  |  |
|-------|-------|-------|-------------------------------------------|-------------------------------------------------------------------------------------|--|--|--|
| 25657 | -10.9 | 7.0   | 25657                                     | 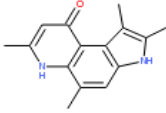   |  |  |  |
| 25778 | 1.0   | 106.0 | 25778,25814,25782,25786                   |    |  |  |  |
| 25780 |       |       | 25780,25820,25790,25824,25784,25788,25812 |    |  |  |  |
| 25782 | 0.9   | 105.0 | 25782,25778,25814,25786                   |    |  |  |  |
| 25784 | -0.0  | 97.0  | 25784,25812,25790,25820,25780,25824       |    |  |  |  |
| 25786 | -0.1  | 97.0  | 25786,25814,25778,25782                   |  |  |  |  |
| 25788 |       |       | 25788,25790,25824,25780                   |  |  |  |  |
| 25790 |       |       | 25790,25812,25788,25824,25784,25780,25820 |  |  |  |  |
| 25792 | -23.4 | -96.0 | 25792                                     |  |  |  |  |
| 25812 | 0.1   | 99.0  | 25812,25784,25790,25780                   |  |  |  |  |
| 25814 | -2.8  | 74.0  | 25814,25778,25786,25782                   |  |  |  |  |

|       |       |        |                                                                   |                                                                                     |    |                                  |      |
|-------|-------|--------|-------------------------------------------------------------------|-------------------------------------------------------------------------------------|----|----------------------------------|------|
| 25820 | -11.1 | 6.0    | 25820,25780,25784,25790,25824                                     | 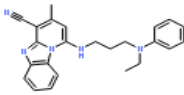   | 15 |                                  | True |
| 25824 | -1.6  | 84.0   | 25824,25788,25790,25780,25784,25820                               |    |    |                                  |      |
| 26760 | -26.2 | -295.0 | 26760,26764,26828,35820                                           |    |    | artifact, fluorescence bleaching | True |
| 26764 | -0.5  | 80.0   | 26764,26760,26828,35820                                           |    |    |                                  |      |
| 26828 | -4.4  | 23.0   | 26828,26832,26760,26764                                           |    |    | artifact, fluorescence bleaching | True |
| 26832 | -2.1  | 56.0   | 26832,26828                                                       |  |    | artifact, fluorescence bleaching | True |
| 26897 | -9.6  | -53.0  | 26897,26901,26909,31487,26911,31483,31481                         |  |    |                                  |      |
| 26901 | -18.9 | -190.0 | 26901,26897,26909,31487,26911,31483,31481                         |  |    | artifact, fluorescence bleaching | True |
| 26909 | -8.2  | -32.0  | 26909,26911,31487,26897,26901,31483,31481                         |  |    | artifact, fluorescence bleaching | True |
| 26911 | -5.6  | 5.0    | 26911,26909,31487,26897,26901,31483,31481                         |  |    | artifact, fluorescence bleaching | True |
| 27175 | -2.4  | 59.0   | 27175,27183,27245,27203,27233,30061,28029,30081,30083,30085,30063 |  |    |                                  |      |

|       |        |         |                                                                   |                                                                                     |     |                                  |      |
|-------|--------|---------|-------------------------------------------------------------------|-------------------------------------------------------------------------------------|-----|----------------------------------|------|
| 27183 | -3.1   | 47.0    | 27183,27245,27175,27203,27233,28029,30061,30081,30083,30085       | 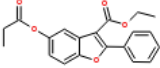   |     | artifact, fluorescence bleaching | True |
| 27203 | -4.6   | 23.0    | 27203,27175,27183,27233,27245,28029,30083,30085,30061,30081,30063 |    |     |                                  |      |
| 27233 | -3.1   | 47.0    | 27233,30063,27175,27203,27183,28029,27245,30081,30083,30061,30085 |    |     | artifact, fluorescence bleaching | True |
| 27245 | -143.0 | -2117.0 | 27245,27183,27175,27203,27233,28029,30081,30061,30085             |    |     |                                  |      |
| 27268 | 0.4    | 101.0   | 27268,27270                                                       |    |     |                                  |      |
| 27270 | -5.6   | 9.0     | 27270,27268                                                       |  |     |                                  |      |
| 27519 | -3.3   | 50.0    | 27519                                                             |  | 6.1 |                                  | True |
| 28029 | -5.4   | 22.0    | 28029,27175,27183,27233,27203,27245,30081,30061                   |  |     | artifact, fluorescence bleaching | True |
| 28764 | -0.3   | 91.0    | 28764                                                             |  |     |                                  |      |
| 28824 | 0.2    | 100.0   | 28824,30331,25365                                                 |  |     |                                  |      |
| 29189 | 1.4    | 106.0   | 29189,29219                                                       |  |     |                                  |      |

|       |        |         |                                                                                                 |                                                                                     |                                  |  |      |
|-------|--------|---------|-------------------------------------------------------------------------------------------------|-------------------------------------------------------------------------------------|----------------------------------|--|------|
| 29191 | -0.5   | 89.0    | 29191,29195,29197                                                                               | 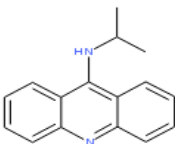   |                                  |  |      |
| 29193 | 0.9    | 101.0   | 29193                                                                                           |    |                                  |  |      |
| 29195 | 2.9    | 119.0   | 29195,29191,29197                                                                               |    |                                  |  |      |
| 29197 | 2.6    | 116.0   | 29197,29195,29191                                                                               |    |                                  |  |      |
| 29199 | -8.7   | 16.0    | 29199,30927,29219                                                                               |    |                                  |  |      |
| 29219 | -1.1   | 83.0    | 29219,29199,29189                                                                               |  |                                  |  |      |
| 29582 | -9.8   | 10.0    | 29582,38442,31017,101707                                                                        |  |                                  |  |      |
| 29953 | -146.6 | -1233.0 | 29953,36213,36211,36247,29955,29963,29957,36209,36527,36249,36245,29961,36273,36519,36525,36243 |  | artifact, fluorescence bleaching |  | True |
| 29955 | -0.3   | 89.0    | 29955,36243,29953,36241,29957,29961,36213,36519,36525,36211,36247,29963,29965                   |  |                                  |  |      |
| 29957 | 0.1    | 93.0    | 29957,36223,36215,36221,29953,29955,36219,36273,36217,36249                                     |  | 40                               |  | True |
| 29959 | -0.9   | 85.0    | 29959                                                                                           |  |                                  |  |      |



|       |       |        |                                                                         |                                                                                     |    |                                  |
|-------|-------|--------|-------------------------------------------------------------------------|-------------------------------------------------------------------------------------|----|----------------------------------|
| 29961 | -9.3  | 9.0    | 29961,29985,29987,29965,29963,29955,29953                               | 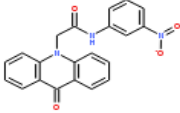   |    |                                  |
| 29963 | 0.8   | 100.0  | 29963,29961,29965,29985,29987,29953,29955,36211,36247                   |    |    |                                  |
| 29965 | 0.4   | 96.0   | 29965,29961,29985,29987,29963,29955                                     |    |    |                                  |
| 29985 | -2.1  | 73.0   | 29985,29961,29987,29965,29963                                           |    |    |                                  |
| 29987 | -1.2  | 82.0   | 29987,29985,29961,29965,29963                                           |    |    |                                  |
| 30059 | 8.0   | 165.0  | 30059,30081,30061,30083,30063,30085                                     |  |    |                                  |
| 30061 | -9.2  | 10.0   | 30061,30081,30083,30085,30063,27175,27183,30059,27245,27203,27233,28029 |  | 31 | True                             |
| 30063 | -23.0 | -115.0 | 30063,30081,30083,27233,30061,30085,30059,27175,27203                   |  |    | artifact, fluorescence bleaching |
| 30067 | -0.2  | 91.0   | 30067                                                                   |  |    |                                  |
| 30081 | -2.0  | 75.0   | 30081,30061,30085,30083,30063,30059,27175,27245,27183,27233,27203,28029 |  |    | artifact, fluorescence bleaching |
| 30083 | -17.1 | -62.0  | 30083,30085,30061,30081,30063,27203,27175,30059,27183,27233             |  |    | artifact, fluorescence bleaching |

|       |       |        |                                                                                                                   |                                                                                     |    |                                  |      |
|-------|-------|--------|-------------------------------------------------------------------------------------------------------------------|-------------------------------------------------------------------------------------|----|----------------------------------|------|
| 30085 | -26.7 | -149.0 | 30085,30083,30081,30061,30063,27203,27175,30059,27183,27233,27245                                                 | 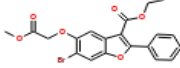   |    | artifact, fluorescence bleaching | True |
| 30331 | -0.6  | 90.0   | 30331,25329,25541,25343,28824,25365,25543,39547                                                                   |    |    |                                  |      |
| 30575 | 2.7   | 116.0  | 30575,30595,30593,31357,31359,25551,25575,25609,25549                                                             |    |    |                                  |      |
| 30593 | -0.8  | 85.0   | 30593,25551,25549,25609,25573,30575,25605,30595,25603,25575,25607,25339                                           |    |    |                                  |      |
| 30595 | 1.0   | 101.0  | 30595,31359,30575,30597,25569,25573,30593,25601                                                                   |   |    |                                  |      |
| 30597 | 2.6   | 115.0  | 30597,25571,30595,25569,31359,25573                                                                               |  |    |                                  |      |
| 30713 | -2.3  | 71.0   | 30713,30747,31862,31868,31840,31894,31860,31447,31443,31870,31958,31864,31892,31866,31411,31872,31618,31391,31421 |  | 39 |                                  | True |
| 30747 | -0.8  | 85.0   | 30747,30713,31868,31840,31892,31864,31447,31862,31443,31958,31860,31894,31890,31870,31411,31618,31391,31421       |  |    |                                  |      |
| 30927 | -8.3  | 7.0    | 30927,29199                                                                                                       |  |    |                                  |      |
| 31017 | 0.4   | 100.0  | 31017,29582                                                                                                       |  |    |                                  |      |
| 31357 | 0.7   | 103.0  | 31357,25605,25607,25603,30575,25609,31381,31359                                                                   |  |    |                                  |      |

|                 |       |        |                                                                                                                                                                                                       |                                                                                     |    |  |      |
|-----------------|-------|--------|-------------------------------------------------------------------------------------------------------------------------------------------------------------------------------------------------------|-------------------------------------------------------------------------------------|----|--|------|
| 31359           | -22.9 | -169.0 | 31359,30595,30575,30597,25609,31357                                                                                                                                                                   | 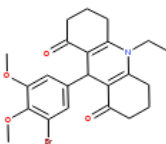   |    |  |      |
| 31379           | 12.5  | 239.0  | 31379,25613,25309,31381,25365,25615,25371,25329,25541,25369,25343,25543                                                                                                                               |    |    |  |      |
| 31381           | -1.9  | 72.0   | 31381,25615,31379,25613,25365,25309,31357                                                                                                                                                             |    |    |  |      |
| 31391           | -4.3  | 44.0   | 31391,31409,31443,31447,31411,31840,31868,31441,31421,30713,31445,31862,30747,31417,31870                                                                                                             |    |    |  |      |
| 31409           | -0.1  | 94.0   | 31409,31391,31413,31858,31423,31443                                                                                                                                                                   |    |    |  |      |
| 31411           | 0.9   | 105.0  | 31411,31862,31892,31864,31443,31417,31413,31447,31421,31868,31840,31866,31872,31776,31890,31802,31441,31860,31894,31445,31415,31800,31391,31858,31620,31798,31870,31423,30713,31770,30747,31774,31618 |   | 31 |  | True |
| 31413 = Scaff10 | -9.0  | -9.0   | 31413,31411,31415,31862,31423,31892,31864,31858,31443,31770,31417,31776,31447,31764,31866,31802,31409,31840,31868,31768,31872,31421,31419,31890,31800,31860,31894                                     |  | 12 |  | True |
| 31415           | -1.4  | 78.0   | 31415,31413,31872,31419,31890,31441,31445,31620,31411,31870,31766,31862,31423,31864,31892,31858                                                                                                       |  |    |  |      |
| 31417           | -2.0  | 72.0   | 31417,31866,31411,31421,31798,31443,31862,31770,31860,31864,31892,31894,31447,31800,31413,31868,31423,31840,31776,31802,31796,31872,31441,31890,31445,31768,31391                                     |  |    |  |      |
| 31419           | -0.2  | 92.0   | 31419,31423,31415,31441,31768,31421,31445,31870,31860,31894,31413,31766,31872,31890,31858                                                                                                             |  |    |  |      |
| 31421           | -0.5  | 89.0   | 31421,31894,31860,31443,31423,31417,31447,31411,31796,31866,31868,31840,31768,31862,31800,31441,31864,31892,31419,31445,31391,31858,31413,31798,31870,30713,31770,30747                               |  |    |  |      |

|       |       |        |                                                                                                                                                                                           |                                                                                     |    |                     |      |
|-------|-------|--------|-------------------------------------------------------------------------------------------------------------------------------------------------------------------------------------------|-------------------------------------------------------------------------------------|----|---------------------|------|
| 31423 | 0.2   | 97.0   | 31423,31768,31419,31421,31894,31860,31413,31858,31443,31796,31770,31417,31447,31866,31409,31800,31840,31415,31411,31868,31764,31862,31864,31892                                           | 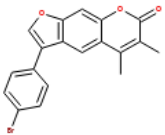   |    | artifact, activator | True |
| 31441 | -1.8  | 74.0   | 31441,31445,31870,31443,31872,31447,31890,31411,31415,31840,31868,31419,31421,31391,31620,31862,31804,31417,31860,31864,31892,31894,31858,31766                                           |    | 21 |                     | True |
| 31443 | -0.2  | 92.0   | 31443,31447,31840,31868,31411,31421,31441,31862,31391,31417,31892,31864,31860,31894,31445,31858,31870,31413,31866,31423,30713,31776,31802,31796,30747,31774,31872,31890,31409,31798,31768 |    |    |                     |      |
| 31445 | -0.0  | 94.0   | 31445,31441,31447,31870,31872,31443,31890,31415,31411,31421,31419,31620,31840,31868,31862,31417,31804,31892,31894,31864,31860,31391                                                       |    |    |                     |      |
| 31447 | -1.2  | 81.0   | 31447,31443,31445,31411,31421,31868,31840,31441,31862,31417,31391,31894,31892,31864,31860,31870,30713,31858,31413,31866,30747,31423,31872,31776,31890,31802,31796,31774                   |    |    |                     |      |
| 31451 | -7.7  | 5.0    | 31451                                                                                                                                                                                     |  |    |                     |      |
| 31481 | 164.0 | 1985.0 | 31481,31483,31487,26897,26901,26909,26911                                                                                                                                                 |  | 33 |                     | True |
| 31483 | 142.3 | 1735.0 | 31483,31481,26897,31487,26901,26909,26911                                                                                                                                                 |  | 26 |                     | True |
| 31487 | -4.7  | 40.0   | 31487,26909,26897,26911,26901,31481,31483                                                                                                                                                 |  | 28 |                     | True |
| 31618 | 0.1   | 94.0   | 31618,31958,31776,31802,31962,31620,31960,31800,31798,31956,31774,30713,31796,30747,31411                                                                                                 |  |    |                     |      |
| 31620 | 0.6   | 100.0  | 31620,31776,31802,31804,31800,31798,31618,31872,31962,31890,31415,31774,31445,31796,31411,31441,31956,31862,31870,31958,31864,31892                                                       |  |    |                     |      |

|       |      |       |                                                                                                                                           |                                                                                     |    |  |      |
|-------|------|-------|-------------------------------------------------------------------------------------------------------------------------------------------|-------------------------------------------------------------------------------------|----|--|------|
| 31764 | -8.6 | -4.0  | 31764,31766,31768,31858,31770,31413,31774,31423,31840,31868,31864,31892,31862                                                             |    | 10 |  | True |
| 31766 | -0.5 | 87.0  | 31766,31764,31832,31415,31804,31768,31419,31890,31858,31770,31870,31872,31441                                                             |    |    |  |      |
| 31768 | 3.5  | 132.0 | 31768,31423,31770,31858,31764,31894,31860,31421,31419,31413,31796,31766,31840,31868,31866,31443,31800,31417,31864,31892                   |    |    |  |      |
| 31770 | -4.2 | 46.0  | 31770,31768,31866,31417,31764,31413,31858,31423,31798,31892,31864,31862,31766,31800,31411,31860,31894,31421                               |    | 24 |  | True |
| 31774 | -0.6 | 86.0  | 31774,31804,31802,31776,31796,31798,31800,31620,31958,31764,31443,31618,31447,31868,31840,31411,31960                                     |    |    |  |      |
| 31776 | 0.5  | 99.0  | 31776,31802,31800,31798,31620,31774,31796,31618,31411,31862,31958,31804,31864,31892,31413,31443,31417,31447,31866,31840,31868,31960,31962 |  |    |  |      |
| 31796 | -1.7 | 74.0  | 31796,31800,31798,31776,31802,31774,31421,31894,31860,31958,31423,31620,31443,31804,31417,31768,31447,31866,31840,31868,31618,31962       |  |    |  |      |
| 31798 | -0.1 | 92.0  | 31798,31800,31776,31802,31796,31417,31866,31774,31620,31770,31618,31804,31411,31958,31421,31862,31443,31860,31864,31892,31894             |  |    |  |      |
| 31800 | 0.2  | 95.0  | 31800,31796,31798,31776,31802,31620,31417,31618,31774,31421,31866,31411,31860,31894,31862,31423,31864,31892,31413,31770,31804,31958,31768 |  | 27 |  | True |
| 31802 | -5.6 | 30.0  | 31802,31776,31800,31798,31774,31620,31796,31618,31411,31804,31862,31958,31864,31892,31413,31443,31417,31447,31866,31840,31868,31960,31962 |  |    |  |      |
| 31804 | -1.2 | 79.0  | 31804,31774,31620,31802,31962,31776,31796,31766,31798,31441,31445,31956,31800,31870,31958                                                 |  |    |  |      |

|       |      |       |                                                                                                                                                                                                 |                                                                                     |    |                                  |      |
|-------|------|-------|-------------------------------------------------------------------------------------------------------------------------------------------------------------------------------------------------|-------------------------------------------------------------------------------------|----|----------------------------------|------|
| 31832 | -0.5 | 87.0  | 31832,31766                                                                                                                                                                                     | 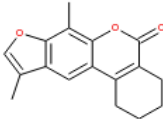   |    |                                  |      |
| 31840 | -0.6 | 86.0  | 31840,31868,31892,31864,31443,31862,31860,31894,31447,31858,30747,31870,31411,31421,31890,31866,31441,30713,31417,31391,31872,31445,31413,31423,31768,31776,31764,31802,31796,31774             |    |    |                                  |      |
| 31858 | -1.1 | 81.0  | 31858,31868,31840,31768,31413,31443,31764,31423,31770,31892,31864,31447,31862,31409,31411,31860,31894,31421,31766,31415,31870,31441,31419,31866                                                 |    |    | artifact, fluorescence bleaching | True |
| 31860 | -0.9 | 83.0  | 31894,31860,31421,31866,31862,31868,31423,31840,31443,31417,31892,31864,31768,31447,31796,31411,31870,30713,31800,31872,31419,31858,30747,31441,31890,31445,31413,31770,31798                   |    |    |                                  |      |
| 31862 | -2.1 | 69.0  | 31862,31892,31864,31411,31866,31872,31868,31840,31894,31860,31413,31443,31890,31417,31447,31870,30713,31776,31421,31802,31858,30747,31800,31415,31441,31445,31770,31620,31798,31423,31391,31764 |    |    |                                  |      |
| 31864 | -8.2 | 1.0   | 31892,31864,31862,31411,31868,31840,31890,31866,31872,31413,31443,31417,31894,31860,31447,30747,31776,31421,31858,31802,31870,30713,31770,31800,31415,31441,31764,31445,31620,31798,31423,31768 |  | 17 |                                  | True |
| 31866 | -1.7 | 74.0  | 31866,31417,31862,31894,31860,31892,31864,31411,31770,31798,31421,31868,31840,31872,31443,31800,31447,31890,31413,31870,31423,31776,30713,31802,31796,31768,31858                               |  |    |                                  |      |
| 31868 | 1.1  | 106.0 | 31840,31868,31892,31864,31443,31862,31860,31894,31447,31858,30747,31870,31411,31421,31890,31866,31441,30713,31417,31391,31872,31445,31413,31423,31768,31776,31764,31802,31796,31774             |  |    |                                  |      |
| 31870 | 1.0  | 104.0 | 31870,31441,31872,31445,31890,31868,31840,31443,31862,31894,31860,31447,31415,31892,31864,31419,30713,31866,31411,31421,31858,31620,30747,31804,31766,31391                                     |  |    |                                  |      |
| 31872 | 1.0  | 104.0 | 31872,31890,31870,31862,31415,31441,31864,31892,31445,31411,31620,31866,31840,31868,31860,31894,31447,31413,31443,31417,31419,30713,31766                                                       |  | 14 |                                  | True |
| 31890 | 0.1  | 94.0  | 31890,31872,31892,31864,31870,31862,31415,31441,31445,31868,31411,31840,31620,31866,31447,31413,31443,30747,31766,31417,31860,31894,31419                                                       |  |    |                                  |      |

|       |       |       |                                                                                                                                                                                                 |                                                                                     |    |  |      |
|-------|-------|-------|-------------------------------------------------------------------------------------------------------------------------------------------------------------------------------------------------|-------------------------------------------------------------------------------------|----|--|------|
| 31892 | -11.8 | -39.0 | 31892,31864,31862,31411,31868,31840,31890,31866,31872,31413,31443,31417,31894,31860,31447,30747,31776,31421,31858,31802,31870,30713,31770,31800,31415,31441,31764,31445,31620,31798,31423,31768 | 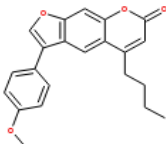   | 11 |  | True |
| 31894 | 0.3   | 96.0  | 31894,31860,31421,31866,31862,31868,31423,31840,31443,31417,31892,31864,31768,31447,31796,31411,31870,30713,31800,31872,31419,31858,30747,31441,31890,31445,31413,31770,31798                   |    |    |  |      |
| 31956 | 0.9   | 103.0 | 31956,31962,31958,31618,31620,31804,31960                                                                                                                                                       |    |    |  |      |
| 31958 | -0.2  | 90.0  | 31958,31618,31962,31960,31956,31776,31796,31802,31774,30713,30747,31798,31620,31800,31804                                                                                                       |    |    |  |      |
| 31960 | -2.7  | 62.0  | 31960,31958,31618,31962,31776,31956,31802,31774                                                                                                                                                 |   | 37 |  | True |
| 31962 | 1.2   | 106.0 | 31962,31956,31958,31618,31620,31804,31960,31776,31796,31802                                                                                                                                     |  |    |  |      |
| 32431 | -4.0  | 57.0  | 32431,35820                                                                                                                                                                                     |  | 20 |  | True |
| 32662 | 1.7   | 109.0 | 32662,101343,101291,101346,101347,101344                                                                                                                                                        |  |    |  |      |
| 34444 | -2.1  | 66.0  | 34444,25339                                                                                                                                                                                     |  |    |  |      |
| 34714 | -7.1  | 3.0   | 34714                                                                                                                                                                                           |  |    |  |      |
| 35673 | -0.2  | 89.0  | 35673,35701,35705                                                                                                                                                                               |  |    |  |      |

|       |      |       |                                     |                                                                                     |  |  |  |
|-------|------|-------|-------------------------------------|-------------------------------------------------------------------------------------|--|--|--|
| 35699 | 0.8  | 103.0 | 35699                               | 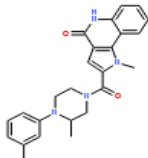   |  |  |  |
| 35701 | 1.8  | 118.0 | 35701,35703,35733,35711,35673,35707 |    |  |  |  |
| 35703 | 0.2  | 95.0  | 35703,35701                         |    |  |  |  |
| 35705 | -0.4 | 87.0  | 35705,35673                         |    |  |  |  |
| 35707 | -6.1 | 4.0   | 35707,35701                         |    |  |  |  |
| 35709 | 1.1  | 108.0 | 35709                               |  |  |  |  |
| 35711 | -0.7 | 82.0  | 35711,35729,35701,35733             |  |  |  |  |
| 35729 | 0.8  | 104.0 | 35729,35711                         |  |  |  |  |
| 35733 | -0.6 | 84.0  | 35733,35701,35711                   |  |  |  |  |
| 35820 | -6.4 | 0.0   | 35820,32431,26760,26764             |  |  |  |  |



|       |       |        |                                                                                                                                                                                                                                                                                                                                                                            |                                                                                     |  |  |
|-------|-------|--------|----------------------------------------------------------------------------------------------------------------------------------------------------------------------------------------------------------------------------------------------------------------------------------------------------------------------------------------------------------------------------|-------------------------------------------------------------------------------------|--|--|
| 35857 | -3.0  | 42.0   | 35857,35891,35955,35925,35961,35897,35953,35861,35862,35865,35895,35967,35921,35889,35871,35867,35959,35859,35927,35997,36123,35903,36127,35901,35863,35964,35870,35902,35991,35999,35893,36089,35869,35933,35965,35864,35963,36087,36179,35987,35935,35931,35923,35899,35985,36145,35935858,36181,36179,36183,36185,35991,35989,35868,36085,35863,35870                   |    |  |  |
| 35858 | -0.5  | 86.0   |                                                                                                                                                                                                                                                                                                                                                                            |    |  |  |
| 35859 | -1.1  | 75.0   | 35859,35861,35867,35897,35891,36149,35870,35863,35893,35857,35987,35991,35985,35931,35899,36091,36063,36061,35929,36125,35961,35869,36151,36181,36049,36051,36083,36087,35871,35889,35959,35921,36017,36019,36153,35935,35997,35989,36059                                                                                                                                  |    |  |  |
| 35861 | 0.8   | 109.0  | 35861,35867,35859,35897,36149,35891,35857,35987,35931,35899,35985,35869,35870,35863,36087,35961,35929,35893,36125,35935,36059,36151,36083,35959,35889,35871,35921,35991,36153,35997,36091,35955,35903,36127,35865,36049,36051,35895,35901,35964,36185,36063,36061,35902,36019,36017,35935862,35864,36063,35868,36083,35857,36059,36115,36147,36061,35955,36085,35891,35925 |    |  |  |
| 35862 | -0.5  | 86.0   |                                                                                                                                                                                                                                                                                                                                                                            |    |  |  |
| 35863 | -2.6  | 50.0   | 35863,35889,35865,36091,35901,36087,35933,35959,35921,35871,35859,35997,35891,35895,35870,35893,35927,36089,35925,35935,35861,35989,35903,36127,36181,35867,35857,35991,35999,36093,35869,36123,35858,35963,36063,36061,35897,35961,35923,35899,35931,35985,36145,35957,35985                                                                                              |   |  |  |
| 35864 | 6.0   | 198.0  | 35864,35862,36063,35868,36083,36059,35891,36061,36115,36147,36085,35857,35897,35961                                                                                                                                                                                                                                                                                        |  |  |  |
| 35865 | -1.6  | 66.0   | 35865,35933,35889,35895,35863,35927,35901,36089,35999,36123,36093,35959,35921,35871,35923,35925,35899,35931,35997,35985,35957,36145,35891,35965,35857,36087,36119,36091,36127,35903,35967,36125,35929,36117,36121,35963,36177,36183,35897,35961,35935,35953,35985,35861,35985                                                                                              |  |  |  |
| 35867 | -16.4 | -189.0 | 35867,35861,35859,35897,36149,35891,35857,35987,35899,35931,35985,36151,35869,36087,35863,35870,36125,35929,36153,35961,35893,35935,36059,36049,36051,36083,35959,35921,35889,35871,35991,35997,36091,35955,35903,36127                                                                                                                                                    |  |  |  |
| 35868 | -1.5  | 68.0   | 35868,36063,36085,35862,35864,36061,36059,35991,36083,35858,35870                                                                                                                                                                                                                                                                                                          |  |  |  |
| 35869 | -1.0  | 77.0   | 35869,35891,35861,35867,36087,35863,35857,35859,35935,35871,35889,35921,35959,35870,35893,35897,35961                                                                                                                                                                                                                                                                      |  |  |  |

|       |       |        |                                                                                                                                                                                                                                                                                                                                                                                                                                                                                                                                           |                                                                                     |                     |      |
|-------|-------|--------|-------------------------------------------------------------------------------------------------------------------------------------------------------------------------------------------------------------------------------------------------------------------------------------------------------------------------------------------------------------------------------------------------------------------------------------------------------------------------------------------------------------------------------------------|-------------------------------------------------------------------------------------|---------------------|------|
| 35870 | 1.2   | 115.0  | 35870,36061,35964,35859,35893,35891,36063,35863,36059,36085,35861,36181,35867,35857,35991,36091,35868,35858,36177,35961,35897,35869,36149                                                                                                                                                                                                                                                                                                                                                                                                 |    |                     |      |
| 35871 | -6.1  | -11.0  | 35871,35959,35921,35997,35927,35925,35895,35889,35999,35933,36127,35903,35963,35891,35931,35923,35957,35899,35985,36145,36093,35865,35863,35897,35961,35935,35953,36123,35965,35857,35901,35995,36121,36087,36125,36117,36179,35929,36155,36089,35989,36091,35955,35861,36119,35867,3615877,35907,35909                                                                                                                                                                                                                                   |    |                     |      |
| 35877 | 0.5   | 104.0  |                                                                                                                                                                                                                                                                                                                                                                                                                                                                                                                                           |    |                     |      |
| 35889 | 1.6   | 122.0  | 35889,35865,35959,35921,35871,35863,35997,35933,35901,35891,36127,35903,35927,35925,35895,35963,36087,35961,35897,35999,36089,36091,36093,35857,35931,35957,35923,35899,36145,35985,36123,36119,36179,35953,35935,35955,35861,35965,35867,36117,35929,36125,35859,35965,35869,36121                                                                                                                                                                                                                                                       |    | artifact, activator | True |
| 35891 | -7.4  | -33.0  | 35891,35857,35961,35897,35959,35921,35871,35889,35997,35861,36127,35903,35867,35859,35955,35895,35865,35864,35870,35967,35863,35963,35893,36179,35927,35925,36123,35869,35964,35901,36087,35902,35999,35991,35935,36089,36059,36091,35933,35965,35862,36063,36061,35987,35953,35985,35893,35893,35991,36149,35961,35902,35870,35859,35935,35891,35955,35989,35967,35863,35861,36151,35963,35867,36061,36063,35857,36153,36025,36091,35965,36181,35987,35897,35953,35995,36059,35869                                                       |    |                     |      |
| 35893 | 0.7   | 108.0  |                                                                                                                                                                                                                                                                                                                                                                                                                                                                                                                                           |  |                     |      |
| 35895 | -7.7  | -39.0  | 35895,35927,35999,35933,35959,35871,35921,35957,35985,35931,35925,35923,35899,36145,35865,35997,36123,36093,35965,35889,36089,35891,35903,36127,36121,35857,35863,35901,35963,35929,36117,36125,35953,35935,36155,35995,36177,35967,36119,36087,36183,35961,35897,35989,36091,35861,35997,35861,35867,35859,35899,35931,35857,35921,35889,35871,35959,35929,36125,35997,36149,36083,35903,36127,36153,35955,36151,35963,35925,35927,35895,35865,35864,35901,35863,35964,35967,36017,36019,35870,36179,36185,35902,35999,35893,36155,35869 |  |                     |      |
| 35897 | -22.1 | -289.0 | 35897,35861,35867,35859,35891,35987,35961,35985,35899,35931,35857,35921,35889,35871,35959,35929,36125,35997,36149,36083,35903,36127,36153,35955,36151,35963,35925,35927,35895,35865,35864,35901,35863,35964,35967,36017,36019,35870,36179,36185,35902,35999,35893,36155,35869                                                                                                                                                                                                                                                             |  |                     |      |
| 35899 | -41.4 | -624.0 | 35931,35985,35899,35927,35895,35999,35929,36125,35933,36155,35959,35871,35921,35925,35923,36145,35957,35897,35997,36093,35865,35987,36123,35861,35965,35889,35867,35859,36121,35903,36127,35901,35963,36117,36185,36153,35953,36089,35995,36151,35891,36083,36119,35863,36177,35857,35991,35865,35889,35995,35863,35933,35964,35902,35895,35871,35959,35921,35927,35997,36089,35925,35891,36087,35857,35999,35931,35899,35985,36093,36091,36123,35903,35965,36127,35963,35897,35953,35935,35957,35923,36145,35861,36119                   |  |                     |      |
| 35901 | -2.1  | 59.0   |                                                                                                                                                                                                                                                                                                                                                                                                                                                                                                                                           |  |                     |      |
| 35902 | -2.1  | 59.0   | 35902,35995,35964,35893,35901,35961,36151,35955,36149,35967,36153,35891,35965,35963,35857,35987,35953,35935,35991,35897,36155,35861                                                                                                                                                                                                                                                                                                                                                                                                       |  |                     |      |

|       |       |        |                                                                                                                                                                                                                                                                                                                                                                                                                                                                                                                                                 |                                                                                     |  |  |  |
|-------|-------|--------|-------------------------------------------------------------------------------------------------------------------------------------------------------------------------------------------------------------------------------------------------------------------------------------------------------------------------------------------------------------------------------------------------------------------------------------------------------------------------------------------------------------------------------------------------|-------------------------------------------------------------------------------------|--|--|--|
| 35903 | -1.2  | 74.0   | 35903,35997,36127,35957,35923,35959,35871,35921,35929,35889,35999,35891,36123,35927,36115,35925,36145,35895,35963,35897,35961,36117,36125,35933,35865,36119,36177,35857,35863,35899,35931,35985,36121,36087,35901,35935,35953,36089,36147,36091,36093,35965,35861,35965,35867,36157                                                                                                                                                                                                                                                             |    |  |  |  |
| 35905 | -9.8  | -74.0  | 35905,35909,35907                                                                                                                                                                                                                                                                                                                                                                                                                                                                                                                               |    |  |  |  |
| 35907 | -4.8  | 11.0   | 35907,35905,35909,35877                                                                                                                                                                                                                                                                                                                                                                                                                                                                                                                         |    |  |  |  |
| 35909 | -11.0 | -96.0  | 35909,35905,35907,35877                                                                                                                                                                                                                                                                                                                                                                                                                                                                                                                         |    |  |  |  |
| 35921 | 0.6   | 104.0  | 35871,35959,35921,35997,35927,35925,35895,35889,35999,35933,36127,35903,35963,35891,35931,35923,35957,35899,35985,36145,36093,35865,35863,35897,35961,35935,35953,36123,35965,35857,35901,35995,36121,36087,36125,36117,36179,35929,36155,36089,35989,36081,35955,35861,36119,35867,36159,35957,35923,35999,35927,36145,35895,35903,35929,35997,35933,35921,35871,35959,35899,35925,35931,35985,36123,36093,35865,36127,36121,36117,36125,36115,35965,36177,35889,36119,35963,35953,36155,36089,35891,35901,35863,36157,35857,35935,35995,36147 |    |  |  |  |
| 35923 | -0.5  | 85.0   | 35923,35923,35999,35927,36145,35895,35903,35929,35997,35933,35921,35871,35959,35899,35925,35931,35985,36123,36093,35865,36127,36121,36117,36125,36115,35965,36177,35889,36119,35963,35953,36155,36089,35891,35901,35863,36157,35857,35935,35995,36147                                                                                                                                                                                                                                                                                           |  |  |  |  |
| 35925 | -20.2 | -255.0 | 35925,35871,35959,35921,35927,35895,35999,35997,35933,35953,35857,36145,35985,35957,35931,35923,35899,35889,35955,36093,35865,36127,35903,35963,35891,36123,35965,35863,35901,35935,35995,36121,36117,36125,35929,35961,35897,36155,36089,35989,35862,36087,36119,36177                                                                                                                                                                                                                                                                         |  |  |  |  |
| 35927 | 0.4   | 102.0  | 35927,35895,35999,35933,35959,35871,35921,35985,36145,35957,35931,35925,35923,35899,35997,35865,36093,36123,35965,35889,35901,36127,36121,35963,35929,36125,36117,36089,36155,35953,35891,35857,36177,35863,35901,36119,35935,35995,35967,35961,35897,35965,36087,36157,35987,36183                                                                                                                                                                                                                                                             |  |  |  |  |
| 35929 | -1.4  | 70.0   | 35929,36125,35985,35957,35931,35923,35899,35903,35999,36123,35897,35927,36145,35997,35895,36127,35987,36117,36115,36155,35933,35861,35865,36119,36177,35959,35921,35871,35867,35859,35925,36121,36159,35889,36153,36089,36093,36151                                                                                                                                                                                                                                                                                                             |  |  |  |  |
| 35931 | -0.1  | 94.0   | 35931,35985,35899,35927,35895,35999,35929,36125,35933,36155,35959,35871,35921,35925,35923,36145,35957,35897,35997,36093,35865,35987,36123,35861,35965,35889,35867,35859,36121,35903,36127,35901,35963,36117,36185,36153,35953,36089,35995,36151,35891,36083,36119,35863,36177,35857,35935,35933,35927,35865,35895,35999,36093,35959,35921,35889,35871,35899,35923,35925,35931,35985,36145,35957,35997,35863,35901,36089,36123,35965,36119,36127,35903,36121,35963,36117,35929,36125,35953,36155,35891,36087,36177,35857,35935,35995,36091,35967 |  |  |  |  |
| 35933 | -0.1  | 93.0   | 35933,35927,35865,35895,35999,36093,35959,35921,35889,35871,35899,35923,35925,35931,35985,36145,35957,35997,35863,35901,36089,36123,35965,36119,36127,35903,36121,35963,36117,35929,36125,35953,36155,35891,36087,36177,35857,35935,35995,36091,35967                                                                                                                                                                                                                                                                                           |  |  |  |  |

|       |       |        |                                                                                                                                                                                                                                                                                                                                                                                                                                                                                                                                              |                                                                                     |                                  |      |
|-------|-------|--------|----------------------------------------------------------------------------------------------------------------------------------------------------------------------------------------------------------------------------------------------------------------------------------------------------------------------------------------------------------------------------------------------------------------------------------------------------------------------------------------------------------------------------------------------|-------------------------------------------------------------------------------------|----------------------------------|------|
| 35934 | -2.2  | 57.0   | 35934                                                                                                                                                                                                                                                                                                                                                                                                                                                                                                                                        |    |                                  |      |
| 35935 | 0.3   | 100.0  | 35935,35963,35965,35989,35953,35995,36121,35921,35959,35871,35961,35893,35997,35895,35863,35991,35927,35925,36149,35861,35955,35891,36087,35889,35867,35967,35902,36117,35999,35869,35933,35903,36127,35865,35901,35857,35859,36155,35985,35957,35931,35923,35899,36145,36081                                                                                                                                                                                                                                                                |    |                                  |      |
| 35953 | -0.5  | 86.0   | 35953,35963,35965,35935,35995,35925,35955,35889,36121,35857,35921,35871,35959,35961,35927,35997,35895,35999,36117,35933,35889,35967,35902,36155,36145,35923,35931,35985,35899,35957,35891,35903,36127,35865,35901,35991,35987,35893,36093                                                                                                                                                                                                                                                                                                    |    |                                  |      |
| 35955 | -49.0 | -755.0 | 35955,35961,35857,35953,35967,35987,35991,35925,35891,35963,35893,36117,35902,35965,35897,35935,35995,35862,35959,35921,35889,35871,36153,35997,35989,35927,36149,35861,36151,36121,35903,36127,35865,35895,35867                                                                                                                                                                                                                                                                                                                            |    | artifact, fluorescence bleaching | True |
| 35957 | -3.2  | 39.0   | 35957,35923,35999,35927,36145,35895,35903,35929,35997,35933,35921,35871,35959,35899,35925,35931,35985,36123,36093,35865,36127,36121,36117,36125,36115,35965,36177,35889,36119,35963,35953,36155,36089,35891,35901,35863,6157,35857,35935,35995,36147                                                                                                                                                                                                                                                                                         |    |                                  |      |
| 35959 | 5.0   | 181.0  | 35871,35959,35921,35997,35927,35925,35895,35889,35999,35933,36127,35903,35963,35891,35931,35923,35957,35899,35985,36145,36093,35865,35863,35897,35961,35935,35953,36123,35965,35857,35901,35995,36121,36087,36125,36117,36179,35929,36155,36089,35989,36091,35955,35861,36119,35867,36135961,35955,35891,35967,35963,35897,35987,35893,35991,35857,35921,35889,35871,35959,35902,36117,35997,35953,35935,35903,35965,36127,36149,35995,35861,35867,36153,35859,35925,35927,35989,36151,36121,35864,35865,35895,35863,35870,36179,35999,35869 |  |                                  |      |
| 35961 | 3.7   | 158.0  | 35961,35955,35891,35967,35963,35897,35987,35893,35991,35857,35921,35889,35871,35959,35902,36117,35997,35953,35935,35903,35965,36127,36149,35995,35861,35867,36153,35859,35925,35927,35989,36151,36121,35864,35865,35895,35863,35870,36179,35999,35869                                                                                                                                                                                                                                                                                        |  |                                  |      |
| 35963 | 2.3   | 134.0  | 35963,35935,35953,35965,35995,35921,35871,35959,35989,35961,36121,35997,35889,35927,35925,35891,35955,35895,35903,36127,35999,36117,35933,35967,35902,35897,35893,36155,35985,35957,35931,35923,35899,36145,35865,35901,35863,35857,35991,35987,36093,36123                                                                                                                                                                                                                                                                                  |  |                                  |      |
| 35964 | -0.0  | 94.0   | 35964,35902,35870,35901,35891,35995,35857,36177,35897,35861                                                                                                                                                                                                                                                                                                                                                                                                                                                                                  |  |                                  |      |
| 35965 | 3.3   | 151.0  | 35965,35963,35953,35935,35995,36121,35895,35989,35927,35967,35999,36117,35933,35865,35871,35921,35959,35961,35957,35985,35931,35925,35923,35997,35899,36145,36155,35955,36123,35902,35987,36093,35891,35901,35889,35857,35893,36089,36151,35903,36127,35863                                                                                                                                                                                                                                                                                  |  |                                  |      |
| 35967 | 0.2   | 98.0   | 35967,35987,35961,35955,35965,36117,35991,35891,36151,35857,36153,35893,35902,35865,35895,35963,35953,35935,35927,35995,36123,36121,35999,35897,36089,36149,35933,35861                                                                                                                                                                                                                                                                                                                                                                      |  |                                  |      |

|       |      |       |                                                                                                                                                                                                                                                                                                                                                                                                                                                                                                                                                                   |                                                                                     |    |  |      |
|-------|------|-------|-------------------------------------------------------------------------------------------------------------------------------------------------------------------------------------------------------------------------------------------------------------------------------------------------------------------------------------------------------------------------------------------------------------------------------------------------------------------------------------------------------------------------------------------------------------------|-------------------------------------------------------------------------------------|----|--|------|
| 35985 | -3.4 | 36.0  | 35931,35985,35899,35927,35895,35999,35929,36125,35933,36155,35959,35871,35921,35925,35923,36145,35957,35897,35997,36093,35865,35987,36123,35861,35965,35889,35867,35859,36121,35903,36127,35901,35963,36117,36185,36153,35953,36089,35995,36151,35891,36083,36119,35863,36177,35857,35987,36153,36151,35967,35961,35897,35955,35985,35899,35931,36155,35861,36149,35867,35859,35929,36125,36117,35965,35902,35891,36083,35963,35857,35991,36185,35893,35953,35995,35927                                                                                           |    |    |  |      |
| 35987 | 0.8  | 109.0 | 35987,36153,36151,35967,35961,35897,35955,35985,35899,35931,36155,35861,36149,35867,35859,35929,36125,36117,35965,35902,35891,36083,35963,35857,35991,36185,35893,35953,35995,35927                                                                                                                                                                                                                                                                                                                                                                               |    |    |  |      |
| 35989 | 6.0  | 199.0 | 35989,35935,35963,35991,35953,35965,35995,35893,36121,35863,35858,35959,35921,35871,35961,35925,35997,35955,35895,35859                                                                                                                                                                                                                                                                                                                                                                                                                                           |    |    |  |      |
| 35991 | 3.4  | 153.0 | 35991,35989,35893,35961,35955,35967,35859,35935,36085,35868,35891,35858,35863,35870,35857,36149,35861,35963,35867,35902,35987,35953,36091                                                                                                                                                                                                                                                                                                                                                                                                                         |    |    |  |      |
| 35995 | 3.4  | 154.0 | 35995,35965,35963,35953,35935,35902,35901,35989,36121,35895,35921,35871,35964,35959,35961,35997,35925,35927,35955,35967,36117,35999,36155,35931,35985,35899,35933,35891,35865,35889,35857,35987,35893,35957,35923,36145                                                                                                                                                                                                                                                                                                                                           |   |    |  |      |
| 35997 | -1.1 | 75.0  | 35997,35959,35871,35921,36127,35903,35999,35889,35927,35957,35925,35923,36145,35895,35963,35891,36123,35933,35899,35985,35931,35865,36121,35863,35961,35897,36117,35929,36125,35953,35935,36093,35965,35857,36177,35901,36119,35995,36087,36179,36115,36147,36089,35989,36091,35955,35899,35927,36145,35923,35957,35895,35997,35933,35921,35871,35959,35899,35925,35931,35985,36123,35865,36093,35903,36127,36121,36125,35929,36117,35965,35889,36177,36119,35963,36089,35953,36155,35891,35901,36157,35863,35857,35935,36115,36147,35995,36159,35967,35961,35897 |  |    |  |      |
| 35999 | -0.8 | 80.0  | 35999,35927,36145,35923,35957,35895,35997,35933,35921,35871,35959,35899,35925,35931,35985,36123,35865,36093,35903,36127,36121,36125,35929,36117,35965,35889,36177,36119,35963,36089,35953,36155,35891,35901,36157,35863,35857,35935,36115,36147,35995,36159,35967,35961,35897                                                                                                                                                                                                                                                                                     |  |    |  |      |
| 36017 | 1.2  | 116.0 | 36017,36019,36049,36051,36029,36025,36021,36027,36031,35859,35897,35861                                                                                                                                                                                                                                                                                                                                                                                                                                                                                           |  |    |  |      |
| 36019 | -1.6 | 66.0  | 36017,36019,36049,36051,36029,36025,36021,36027,36031,35859,35897,35861                                                                                                                                                                                                                                                                                                                                                                                                                                                                                           |  |    |  |      |
| 36021 | -4.0 | 26.0  | 36021,36023,36017,36019,36049,36051                                                                                                                                                                                                                                                                                                                                                                                                                                                                                                                               |  |    |  |      |
| 36023 | -0.5 | 86.0  | 36023,36021,36027                                                                                                                                                                                                                                                                                                                                                                                                                                                                                                                                                 |  | 34 |  | True |

|       |      |       |                                                                                                                         |                                                                                     |  |  |  |
|-------|------|-------|-------------------------------------------------------------------------------------------------------------------------|-------------------------------------------------------------------------------------|--|--|--|
| 36025 | 0.2  | 99.0  | 36025,36029,36049,36051,36017,36019,35893,36031                                                                         |    |  |  |  |
| 36027 | -0.2 | 92.0  | 36027,36089,36091,36093,36087,36119,36017,36019,36049,36051,36023                                                       |    |  |  |  |
| 36028 | -0.9 | 79.0  | 36028,36083                                                                                                             |    |  |  |  |
| 36029 | 0.5  | 103.0 | 36029,36025,36049,36051,36017,36019,36153,36151,36149,36155                                                             |    |  |  |  |
| 36031 | -0.2 | 91.0  | 36031,36017,36019,36025                                                                                                 |    |  |  |  |
| 36049 | 0.7  | 107.0 | 36049,36051,36017,36019,36029,36025,35867,35859,36021,36027,35861                                                       |  |  |  |  |
| 36051 | -7.7 | -38.0 | 36049,36051,36017,36019,36029,36025,35867,35859,36021,36027,35861                                                       |  |  |  |  |
| 36059 | 1.3  | 118.0 | 36059,36061,36085,36063,35864,35868,35862,35870,35861,35891,35867,36157,36083,35857,35859,35893                         |  |  |  |  |
| 36061 | -0.3 | 89.0  | 36061,36059,36085,36063,35868,35870,35864,35862,35859,35893,35891,35863,36157,35861                                     |  |  |  |  |
| 36063 | -0.4 | 88.0  | 36063,35868,35864,36061,35862,36059,36085,36083,35870,35859,35893,36115,36147,35891,35863,35861                         |  |  |  |  |
| 36083 | -5.4 | 0.0   | 36083,35862,35864,36063,35897,36147,36115,35861,35868,35867,36153,35987,35859,35985,35931,35899,36059,36151,36028,36159 |  |  |  |  |

|       |      |       |                                                                                                                                                                                                                                                       |                                                                                     |  |  |
|-------|------|-------|-------------------------------------------------------------------------------------------------------------------------------------------------------------------------------------------------------------------------------------------------------|-------------------------------------------------------------------------------------|--|--|
| 36085 | -0.1 | 93.0  | 36085,36061,35868,36059,36063,35870,35991,35862,35864,35858                                                                                                                                                                                           | 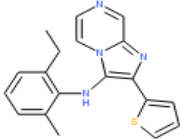   |  |  |
| 36087 | 0.7  | 106.0 | 36087,36091,36089,36093,35863,36119,35889,35865,35891,35861,36127,35901,35921,35871,35959,35867,35935,35997,36027,35869,35933,36123,35903,35895,35857,35859,35925,35927                                                                               |    |  |  |
| 36089 | 2.0  | 129.0 | 36089,36093,36087,36119,36091,35865,35933,36123,35895,35889,35927,36027,35863,35901,35999,36145,35891,36127,35921,35959,35871,35857,36117,36125,35985,35997,35957,35931,35925,35923,35899,35965,35903,36177,35967,35929                               |    |  |  |
| 36091 | 0.1  | 97.0  | 36091,36087,36089,35863,36093,36119,35889,35865,35859,36027,35891,36127,35901,35959,35921,35871,35870,35893,35997,35933,35861,36123,35903,35895,35867,35857,35991,35935                                                                               |    |  |  |
| 36093 | 0.5  | 103.0 | 36093,36089,36119,35933,35927,35895,35999,36087,36145,35865,36091,35921,35871,35959,35899,35923,35925,35931,35957,35985,35889,35997,36123,36027,36121,35965,36127,35901,35863,36125,36117,35903,35963,36177,35929,35953,36155                         |    |  |  |
| 36115 | -1.3 | 73.0  | 36115,36147,35903,36157,35923,35957,36083,35864,35862,36159,35929,36063,35999,35997,36123,36127,36177,36145                                                                                                                                           |  |  |  |
| 36117 | 1.4  | 119.0 | 36117,36121,36123,36145,36127,36125,36177,35999,36119,35965,35967,35961,35927,35923,35997,35957,35955,35895,35903,36157,35963,35987,35929,36147,35953,35933,36159,35865,35921,35871,35959,35935,36155,36089,35899,35931,35925,35985,35995,36093,35889 |  |  |  |
| 36119 | 0.8  | 108.0 | 36119,36089,36093,36123,36145,36127,36087,36125,36117,36091,36177,35999,35933,35865,36121,35927,35957,35997,35923,35895,35903,35889,36157,35929,36027,36147,36159,35921,35959,35871,35925,35985,35899,35931,35901                                     |  |  |  |
| 36121 | 1.1  | 114.0 | 36121,36117,35965,36145,35963,36123,35953,35999,35935,35995,36127,36125,35927,35997,35923,35957,35895,36177,36119,35933,35989,35959,35871,35921,36155,35985,35931,35899,35925,36093,35903,35865,36157,35967,35929,35961,36147,35955,36159,35889       |  |  |  |
| 36123 | -2.2 | 56.0  | 36123,36145,36127,36117,36125,36177,35999,36119,35895,36121,35927,35923,35957,35997,35865,35903,36157,35929,36089,36147,35933,36159,35871,35959,35921,35985,35931,35925,35899,35891,36093,35965,35857,35889,36087,35901,35863,35967,36115,36091,35963 |  |  |  |
| 36125 | -4.1 | 24.0  | 36125,35929,36123,36145,35985,35931,35899,36127,36117,36177,35999,36119,36159,36121,35897,35927,35923,35957,35997,35895,35903,36157,35987,36147,36155,35933,35861,35865,35959,35871,35867,35921,35859,36089,35925,36093,35889,36153,36151             |  |  |  |

|       |      |       |                                                                                                                                                                                                                                                                                                                                                                                                                                                                                                                                                       |                                                                                     |  |  |
|-------|------|-------|-------------------------------------------------------------------------------------------------------------------------------------------------------------------------------------------------------------------------------------------------------------------------------------------------------------------------------------------------------------------------------------------------------------------------------------------------------------------------------------------------------------------------------------------------------|-------------------------------------------------------------------------------------|--|--|
| 36127 | -0.8 | 80.0  | 36127,35997,36123,35903,36145,35959,35871,35921,36125,36117,36177,35889,35999,36119,35891,36121,35927,36147,35957,35925,35923,35895,36157,35963,35961,35897,35929,35933,35865,36159,35857,35863,36087,36089,35899,35985,35931,36091,36093,35901,35953,35935,36115,35861,35965,35965,35861,36145,35999,36123,35927,35957,35923,35895,36127,36121,36117,36125,35997,35933,35959,36177,35871,35921,36119,35985,35899,35925,35931,36093,35865,35903,36157,35929,36147,35965,36159,35889,36089,35963,35953,36155,35891,35901,35863,35857,35935,36115,35965 |    |  |  |
| 36145 | 0.4  | 101.0 | 36147,36115,36157,36159,36123,36127,36117,36125,35997,35933,35959,36177,35871,35921,36119,35985,35899,35925,35931,36093,35865,35903,36157,35929,36147,35965,36159,35889,36089,35963,35953,36155,35891,35901,35863,35857,35935,36115,35965                                                                                                                                                                                                                                                                                                             |    |  |  |
| 36147 | 0.6  | 104.0 | 36147,36115,36157,36159,36123,36127,36117,36125,36083,35864,35862,36117,36125,36119,36063,35999,35997,36121,35903,35957,35923                                                                                                                                                                                                                                                                                                                                                                                                                         |    |  |  |
| 36149 | -0.9 | 79.0  | 36149,36151,35867,36153,35861,35893,35859,36155,35987,35897,35902,35961,35935,36029,35991,35955,35891,35967,35870                                                                                                                                                                                                                                                                                                                                                                                                                                     |    |  |  |
| 36151 | 0.1  | 96.0  | 36151,36153,36149,35987,36155,35967,35902,35867,36029,35893,35897,35861,36185,35961,35859,35985,35985,35931,35899,35955,35965,36083,36125,35929                                                                                                                                                                                                                                                                                                                                                                                                       |    |  |  |
| 36153 | -0.3 | 90.0  | 36153,36151,35987,36155,36149,35967,36029,35897,35902,35867,35893,35961,35899,35931,35985,35955,35861,36083,36185,36125,35929,35859                                                                                                                                                                                                                                                                                                                                                                                                                   |  |  |  |
| 36155 | -0.8 | 81.0  | 36155,36153,35899,35931,35985,36151,36149,35987,35927,35895,35965,35999,36125,35929,35933,36121,35963,35871,35921,35959,36117,35953,35925,35923,36145,35957,35995,36029,35902,35897,35935,35997,36093                                                                                                                                                                                                                                                                                                                                                 |  |  |  |
| 36157 | 0.1  | 96.0  | 36157,36147,36159,36177,36123,36145,36115,36127,36125,36117,36119,35999,36059,36121,36061,35997,35957,35923,35927,35903                                                                                                                                                                                                                                                                                                                                                                                                                               |  |  |  |
| 36159 | -1.5 | 68.0  | 36159,36157,36147,36125,36123,36177,36115,36145,36127,36117,36119,35929,35999,36121,36083                                                                                                                                                                                                                                                                                                                                                                                                                                                             |  |  |  |
| 36177 | 0.6  | 106.0 | 36177,36123,36145,36127,36157,36117,36125,36119,35999,36147,36159,36121,35927,35923,35957,35997,35903,35895,35929,35933,35865,35964,35959,35921,35871,35870,36115,36089,35985,35931,35925,35899,36093                                                                                                                                                                                                                                                                                                                                                 |  |  |  |
| 36179 | 19.2 | 428.0 | 36179,36181,36183,35858,36185,35891,35871,35889,35921,35959,35997,35857,35897,35961                                                                                                                                                                                                                                                                                                                                                                                                                                                                   |  |  |  |



|       |      |       |                                                                                                                                                       |                                                                                     |    |  |      |
|-------|------|-------|-------------------------------------------------------------------------------------------------------------------------------------------------------|-------------------------------------------------------------------------------------|----|--|------|
| 36181 | -9.0 | -61.0 | 36181,35858,36179,36183,36185,35863,35870,35859,35893,35891                                                                                           |    | 15 |  | True |
| 36183 | 2.8  | 143.0 | 36183,36179,36185,36181,35858,35865,35895,35927                                                                                                       |    |    |  |      |
| 36185 | 19.8 | 438.0 | 36185,36183,36179,36181,35858,35899,35931,35985,36151,35897,35987,36153,35861                                                                         |    |    |  |      |
| 36209 | 0.1  | 93.0  | 36527,36209,36245,36213,36247,36211,36241,36249,36255,36273,36251,36519,36525,36243,29953,36215,36523,36217,36253,36517,36223,36221,36219             |    |    |  |      |
| 36211 | 0.4  | 99.0  | 36247,36211,36213,36527,36209,29953,36249,36245,36273,36525,36519,36243,36241,36223,36215,36255,36251,36253,36221,36523,36517,36217,29955,36219,29963 |    |    |  |      |
| 36213 | -0.5 | 82.0  | 36213,36247,36211,36527,36209,29953,36249,36245,36525,36519,36243,36241,36215,36273,36255,36251,36253,36223,36221,36523,36217,36517,29955,36219       |  |    |  |      |
| 36215 | -1.4 | 68.0  | 36215,36221,36219,36223,36217,36273,36255,36525,36519,29957,36213,36251,36253,36247,36243,36211,36241,36249,36209,36527,36523,36517,36521,36245       |  |    |  |      |
| 36217 | 0.6  | 102.0 | 36217,36219,36215,36221,36249,36223,36255,36273,36519,36525,36251,36241,36527,36209,36213,36523,36243,36247,36517,36243,36211,36245,29957             |  |    |  |      |
| 36219 | -3.2 | 38.0  | 36219,36217,36215,36221,36223,36249,36273,36255,29957,36525,36523,36519,36251,36521,36241,36527,36213,36209,36253,36247,36517,36243,36211,36245       |  |    |  |      |
| 36221 | -1.1 | 72.0  | 36221,36215,36219,36223,36217,36273,36255,29957,36525,36519,36249,36213,36523,36251,36253,36247,36243,36211,36521,36241,36209,36527,36517,36245       |  |    |  |      |
| 36223 | -2.0 | 58.0  | 36223,36215,36221,29957,36273,36219,36217,36249,36255,36525,36519,36247,36211,36521,36213,36251,36523,36243,36253,36241,36209,36527,36517,36245       |  |    |  |      |

|       |      |       |                                                                                                                                                       |                                                                                     |  |  |  |
|-------|------|-------|-------------------------------------------------------------------------------------------------------------------------------------------------------|-------------------------------------------------------------------------------------|--|--|--|
| 36241 | 1.4  | 115.0 | 36241,36243,36527,29955,36209,36213,36525,36519,36251,36211,36247,36245,36215,36255,36273,36523,36253,36517,36217,36223,36221,36219,36249             |    |  |  |  |
| 36243 | 1.3  | 114.0 | 36243,36241,29955,36525,36213,36519,36211,36247,36527,36273,36255,36215,36209,36251,36253,36245,36223,36221,36523,36217,36517,36219,29953             |    |  |  |  |
| 36245 | -0.0 | 91.0  | 36245,36527,36209,36213,36247,36211,36525,36523,36241,36255,36273,36519,36251,36243,36249,36215,29953,36517,36253,36217,36223,36221,36219             |    |  |  |  |
| 36247 | -0.1 | 90.0  | 36247,36211,36213,36527,36209,29953,36249,36245,36273,36525,36519,36243,36241,36223,36215,36255,36251,36253,36221,36523,36517,36217,29955,36219,29963 |    |  |  |  |
| 36249 | -0.9 | 76.0  | 36249,36213,36219,36211,36217,36247,36527,36209,36223,36215,36221,29953,36245,36273,36241,29957,36255,36251,36519,36523,36525                         |   |  |  |  |
| 36251 | 0.1  | 94.0  | 36251,36525,36519,36241,36527,36273,36255,36209,36213,36215,36523,36211,36517,36217,36253,36247,36243,36245,36219,36221,36223,36275,36249,36521       |  |  |  |  |
| 36253 | -0.0 | 91.0  | 36253,36255,36525,36519,36213,36215,36273,36251,36211,36243,36247,36241,36527,36223,36221,36209,36523,36517,36217,36245,36219                         |  |  |  |  |
| 36255 | -1.2 | 72.0  | 36255,36215,36273,36221,36525,36519,36217,36253,36527,36223,36219,36213,36209,36251,36243,36247,36211,36241,36245,36523,36517,36521,36249             |  |  |  |  |
| 36273 | 0.6  | 102.0 | 36273,36255,36223,36215,36221,36519,36525,36211,36247,36213,36219,36209,36527,36251,36217,36243,36253,36241,36521,36245,29957,36523,36517,36249,29953 |  |  |  |  |
| 36275 | -0.3 | 87.0  | 36275,36517,36251,36519,36523,36525                                                                                                                   |  |  |  |  |
| 36297 | 0.5  | 100.0 | 36297                                                                                                                                                 |  |  |  |  |

|       |       |        |                                                                                     |                                                                                     |                                  |      |
|-------|-------|--------|-------------------------------------------------------------------------------------|-------------------------------------------------------------------------------------|----------------------------------|------|
| 36361 | -4.9  | 8.0    | 36361,36363,36365                                                                   |    | artifact, fluorescence bleaching | True |
| 36363 | -1.4  | 69.0   | 36363,36365,36361                                                                   |    |                                  |      |
| 36365 | 1.2   | 112.0  | 36365,36363,36361                                                                   |    |                                  |      |
| 36466 | -27.2 | -371.0 | 36466,36476,36472,36474,36468,36470,36530,36506,36512                               |    |                                  |      |
| 36468 | -0.1  | 89.0   | 36468,36466,36472,36476,36474,36470,36530                                           |   |                                  |      |
| 36470 | -2.1  | 56.0   | 36470,36472,36474,36476,36466,36468,36506                                           |  |                                  |      |
| 36472 | -25.2 | -336.0 | 36472,36474,36476,36466,36470,36468,36506,36512,36504,36530                         |  |                                  |      |
| 36474 | -2.1  | 56.0   | 36474,36472,36476,36466,36470,36468,36506,36512,36504,36530                         |  |                                  |      |
| 36476 | -0.7  | 80.0   | 36476,36472,36466,36474,36470,36468,36506,36512,36504,36530                         |  | 48                               | True |
| 36504 | 4.4   | 166.0  | 36504,36506,36512,36536,36542,36530,36538,36534,36544,36472,36476,36474             |  |                                  |      |
| 36506 | -4.6  | 13.0   | 36506,36504,36536,36512,36542,36530,36538,36534,36544,36472,36476,36474,36466,36470 |  |                                  |      |

|       |       |       |                                                                                                                                                             |                                                                                     |  |  |
|-------|-------|-------|-------------------------------------------------------------------------------------------------------------------------------------------------------------|-------------------------------------------------------------------------------------|--|--|
| 36512 | -2.3  | 53.0  | 36512,36506,36504,36530,36534,36536,36542,36538,36544,36472,36476,36474,36466                                                                               | 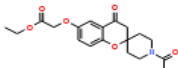   |  |  |
| 36517 | 0.1   | 94.0  | 36517,36525,36519,36275,36251,36241,36527,36273,36255,36215,36213,36209,36523,36243,36247,36253,36217,36211,36245,36223,36221,36219                         |    |  |  |
| 36519 | 0.2   | 96.0  | 36519,36525,36213,36215,36273,36255,36251,36211,36253,36243,36247,36241,36527,36223,36221,36209,36523,36217,36517,36245,36219,29955,36275,29953,36249,36521 |    |  |  |
| 36521 | -5.2  | 3.0   | 36521,36223,36273,36215,36219,36221,36255,39687,36251,36519,36523,36525                                                                                     |    |  |  |
| 36523 | -0.2  | 88.0  | 36523,36525,36245,36519,36251,36241,36527,36273,36255,36223,36221,36219,36215,36213,36209,36243,36247,36253,36217,36517,36211,36275,36249,36521             |   |  |  |
| 36525 | 0.8   | 105.0 | 36525,36519,36243,36213,36215,36273,36255,36523,36251,36211,36253,36247,36241,36245,36527,36223,36221,36209,36517,36217,36219,29955,36275,29953,36249,36521 |  |  |  |
| 36527 | 0.6   | 102.0 | 36527,36209,36245,36213,36247,36211,36241,36249,36255,36273,36251,36519,36525,36243,29953,36215,36523,36217,36253,36517,36223,36221,36219                   |  |  |  |
| 36530 | -0.5  | 84.0  | 36530,36506,36512,36504,36536,36542,36472,36466,36538,36534,36476,36474,36468                                                                               |  |  |  |
| 36534 | -5.9  | -8.0  | 36534,36542,36536,36512,36538,36506,36544,36504,36530                                                                                                       |  |  |  |
| 36536 | -1.9  | 60.0  | 36536,36542,36506,36538,36534,36504,36512,36544,36530                                                                                                       |  |  |  |
| 36538 | -10.8 | -92.0 | 36538,36536,36542,36534,36506,36504,36512,36544,36530                                                                                                       |  |  |  |

|       |       |       |                                                                                                       |                                                                                     |                                  |      |
|-------|-------|-------|-------------------------------------------------------------------------------------------------------|-------------------------------------------------------------------------------------|----------------------------------|------|
| 36540 | -10.2 | -82.0 | 36540                                                                                                 |    |                                  |      |
| 36542 | -4.1  | 23.0  | 36542,36536,36534,36544,36538,36506,36504,36512,36530                                                 |    |                                  |      |
| 36544 | -1.6  | 64.0  | 36544,36542,36536,36534,36538,36506,36512,36504                                                       |    |                                  |      |
| 38039 | -4.2  | 38.0  | 38039                                                                                                 |    |                                  |      |
| 38043 | 0.2   | 101.0 | 38043,38073                                                                                           |    |                                  |      |
| 38058 | 1.0   | 112.0 | 38058,38355,38060,38062,38321,38323,38327,38329,38357,38361,38333,38325,38335,38363,38353,38359,38331 |  |                                  |      |
| 38060 | -7.9  | -13.0 | 38060,38062,38058,38327,38355,38329,38357,38321,38323,38325,38361,38363,38353,38333,38335,38359,38331 |  |                                  |      |
| 38062 | -5.2  | 24.0  | 38060,38062,38058,38327,38355,38329,38357,38321,38323,38325,38361,38363,38353,38333,38335,38359,38331 |  | artifact, fluorescence bleaching | True |
| 38067 | -2.7  | 59.0  | 38067,38073                                                                                           |  |                                  |      |
| 38073 | -6.0  | 13.0  | 38073,38043,38067                                                                                     |  | artifact, fluorescence bleaching | True |

|       |      |       |                                                                                                                               |                                                                                     |     |  |      |
|-------|------|-------|-------------------------------------------------------------------------------------------------------------------------------|-------------------------------------------------------------------------------------|-----|--|------|
| 38242 | 0.9  | 110.0 | 38242,38244,38246                                                                                                             | 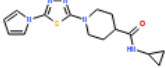   |     |  |      |
| 38244 | 0.6  | 106.0 | 38244,38242,38246,38248                                                                                                       |    |     |  |      |
| 38246 | 0.6  | 106.0 | 38246,38244,38242                                                                                                             |    |     |  |      |
| 38248 | -6.4 | 8.0   | 38248,38244                                                                                                                   |    |     |  |      |
| 38321 | -3.4 | 51.0  | 38321,38323,38355,38058,38325,38335,38060,38062,38331,38359,38353,38363,38327,38329,38357,38361                               |    |     |  |      |
| 38323 | -2.2 | 67.0  | 38323,38321,38355,38058,38335,38331,38359,38060,38062,38353,38363,38325,38327,38329,38357,38361                               |  |     |  |      |
| 38325 | -1.6 | 75.0  | 38325,38335,38363,38353,38357,38329,38359,38331,38327,38361,38333,38321,38062,38060,38323,38058,38355                         |  |     |  |      |
| 38327 | -5.1 | 26.0  | 38327,38357,38329,38361,38325,38363,38353,38333,38060,38062,38335,38058,38331,38359,38355,38323,38321,38717,38985             |  | 4.8 |  | True |
| 38329 | -3.3 | 51.0  | 38329,38357,38361,38327,38363,38353,38325,38333,38359,38331,38335,38060,38062,38058,38677,38355,38683,38323,38321,38717,38985 |  |     |  |      |
| 38331 | -9.3 | -34.0 | 38359,38331,38335,38363,38353,38329,38357,38325,38361,38333,38327,38323,38321,38058,38062,38060,38355                         |  | 47  |  | True |
| 38333 | -3.3 | 52.0  | 38333,38361,38329,38357,38327,38325,38335,38353,38363,38331,38359,38355,38058,38060,38062                                     |  |     |  |      |

|       |       |       |                                                                                                                               |                                                                                     |           |      |      |
|-------|-------|-------|-------------------------------------------------------------------------------------------------------------------------------|-------------------------------------------------------------------------------------|-----------|------|------|
| 38335 | -2.6  | 61.0  | 38335,38359,38331,38325,38363,38353,38329,38357,38361,38333,38327,38323,38321,38058,38062,38060,38355                         | 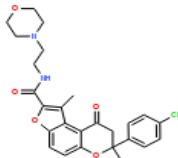   | 23        |      | True |
| 38353 | -3.2  | 54.0  | 38363,38353,38359,38331,38329,38357,38325,38335,38361,38327,38333,38323,38062,38060,38321,38058,38355                         |    |           |      |      |
| 38355 | -12.6 | -82.0 | 38355,38058,38321,38323,38060,38062,38327,38329,38357,38333,38361,38325,38335,38363,38353,38359,38331                         |    |           |      |      |
| 38357 | -7.0  | -2.0  | 38329,38357,38361,38327,38363,38353,38325,38333,38359,38331,38335,38060,38062,38058,38677,38355,38683,38323,38321,38717,38985 |    |           |      |      |
| 38359 | -4.5  | 34.0  | 38359,38331,38335,38363,38353,38329,38357,38325,38361,38333,38327,38323,38321,38058,38062,38060,38355                         |    |           |      |      |
| 38361 | -6.1  | 11.0  | 38361,38333,38357,38329,38327,38363,38353,38359,38331,38325,38335,38058,38062,38060,38355,38323,38321                         |  |           |      |      |
| 38363 | -1.1  | 83.0  | 38363,38353,38359,38331,38329,38357,38325,38335,38361,38327,38333,38323,38062,38060,38321,38058,38355                         |  |           |      |      |
| 38442 | -0.9  | 86.0  | 38442,29582                                                                                                                   |  |           |      |      |
| 38677 | -4.0  | 65.0  | 38677,38683,38705,38717,38329,38357,38985                                                                                     |  |           |      |      |
| 38683 | -8.8  | 28.0  | 38683,38677,38705,38717,38985,38329,38357                                                                                     |  | bad curve | True |      |
| 38705 | -1.8  | 83.0  | 38705,38677,38683,38717,38985                                                                                                 |  |           |      |      |

|        |      |       |                                                                         |                                                                                      |  |  |  |
|--------|------|-------|-------------------------------------------------------------------------|--------------------------------------------------------------------------------------|--|--|--|
| 38717  | -4.9 | 58.0  | 38717,38985,38677,38683,38705,38327,38329,38357                         | 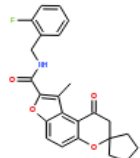    |  |  |  |
| 38985  | 0.1  | 98.0  | 38985,38717,38683,38677,38705,38327,38329,38357                         |     |  |  |  |
| 39547  | -5.5 | 49.0  | 39547,25541,25329,25343,25365,25371,25543,25369,25615,30331,25613,25309 |     |  |  |  |
| 39687  | 0.6  | 102.0 | 39687,36521                                                             |     |  |  |  |
| 40220  | -0.7 | 92.0  | 40220,25365,25369,25371,25329,25541                                     |     |  |  |  |
| 100617 | 2.2  | 113.0 | 100617,101626,24550,24552                                               |  |  |  |  |
| 100915 | 0.1  | 95.0  | 100915,100939,100969,100930,100952,100916,100926,100922,100921          |   |  |  |  |
| 100916 | -0.3 | 92.0  | 100916,100922,100921,100926,100939,100930,100915,100952                 |   |  |  |  |
| 100921 | -0.4 | 91.0  | 100921,100922,100916,100926,100939,100930,100952,100915                 |   |  |  |  |
| 100922 | 0.5  | 98.0  | 100922,100921,100916,100926,100939,100930,100915,100952                 |   |  |  |  |
| 100926 | -2.8 | 73.0  | 100926,100916,100922,100921,100930,100915,100939                        |   |  |  |  |



|        |       |        |                                                                |                                                                                      |  |  |  |
|--------|-------|--------|----------------------------------------------------------------|--------------------------------------------------------------------------------------|--|--|--|
| 100930 | 0.7   | 100.0  | 100930,100915,100921,100939,100916,100926,100922,100969,100952 | 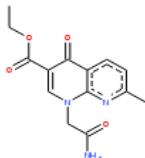    |  |  |  |
| 100939 | -12.1 | 3.0    | 100939,100915,100952,100916,100922,100969,100921,100930,100926 |     |  |  |  |
| 100952 | -1.0  | 87.0   | 100952,100969,100939,100915,100921,100922,100916,100930        |     |  |  |  |
| 100969 | 2.0   | 109.0  | 100969,100952,100915,100939,100930                             |     |  |  |  |
| 101291 | -9.5  | 5.0    | 101291,101343,32662,101346,101347                              |     |  |  |  |
| 101343 | -0.3  | 98.0   | 101343,101291,32662,101346,101347,101344                       |    |  |  |  |
| 101344 | -12.5 | -25.0  | 101344,32662,101343,101347                                     |  |  |  |  |
| 101346 | 0.7   | 108.0  | 101346,101291,101347,101343,32662                              |   |  |  |  |
| 101347 | 1.0   | 111.0  | 101347,101346,101291,101343,32662,101344                       |   |  |  |  |
| 101616 | -13.2 | -16.0  | 101616,24552,24422,24526,101618,24550,24528                    |   |  |  |  |
| 101618 | -53.8 | -377.0 | 24526,101618,24552,101616,24550,24422                          |   |  |  |  |

|        |      |       |                           |                                                                                   |  |  |  |
|--------|------|-------|---------------------------|-----------------------------------------------------------------------------------|--|--|--|
| 101626 | -0.8 | 94.0  | 100617,101626,24550,24552 | 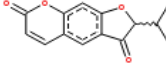 |  |  |  |
| 101707 | 0.6  | 107.0 | 101707,29582              |  |  |  |  |

**1.2.3 Suppl. Tab. 3**

**Suppl. Tab. 3: Overview of all 55 Scaff10 derivatives.** Structures labeled with <sup>1</sup> were commercially obtained. MW = molecular weight. logP = calculated partition coefficient (using Biovia Draw V.16.1), indicates a compound's distribution in a biphasic system consisting of octanol-water. Disruption of the interaction of RhoA and AKAP-Lbc/DHPH (PPI) and IC<sub>50</sub> values refer to HTRF assays (Figure 3 main manuscript), IC<sub>50</sub> values ± SEM; all HTRF experiments were performed in duplicate; X-axis = compound concentration [μM], Y-axis = relative interaction of AKAP-Lbc/DHPH and RhoA (%). Solubility was assessed nephelometrically in DMEM + 10 % FCS + Scaff10 derivative with either 0.3 or 2 % DMSO final concentration; values in μM indicate maximal solubility of the compound under the respective condition. Yield in % indicates total yield of the last step of chemical synthesis for each of Scaff10 derivatives. n.d. = not determined. n.i. = not indicated.

| Scaff10 derivative | Structure                                                                           | MW [g/mol] | log P | HTRF assay                                                                           |                       | Solubility    |                 | Scaff10 class | Yield [%] |    |
|--------------------|-------------------------------------------------------------------------------------|------------|-------|--------------------------------------------------------------------------------------|-----------------------|---------------|-----------------|---------------|-----------|----|
|                    |                                                                                     |            |       | Disruption of the PPI                                                                | IC <sub>50</sub> [μM] | 2 % DMSO [μM] | 0.3 % DMSO [μM] |               |           |    |
| AE168              | 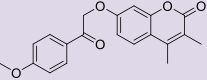   | 338.35     | 4.02  |    | -                     | 2             | 75              | n.d.          | 6         | 62 |
| Scaff10            |    | 320.34     | 4.60  |    | -                     | 4             | 85              | 75            | 8         | 71 |
| AE167              |    | 310.30     | 3.12  |   | -                     | 2             | 30              | n.d.          | 6         | 35 |
| Scaff10-1          |  | 292.29     | 3.71  |  | -                     | 2             | 45              | 40            | 8         | 23 |
| Scaff10-2          |  | 309.32     | 2.88  |  | -                     | 2             | 90              | 75            | 6         | 14 |

| Scaff10 derivative | Structure                                                                           | MW [g/mol] | log P | HTRF assay                                                                           |                       |                         | Solubility    |                 | Scaff10 class | Yield [%] |
|--------------------|-------------------------------------------------------------------------------------|------------|-------|--------------------------------------------------------------------------------------|-----------------------|-------------------------|---------------|-----------------|---------------|-----------|
|                    |                                                                                     |            |       | Disruption of the PPI                                                                | IC <sub>50</sub> [μM] | Number of exp. in dupl. | 2 % DMSO [μM] | 0.3 % DMSO [μM] |               |           |
| Scaff10-3          | 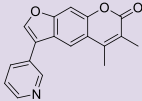   | 291.3      | 3.59  |    | -                     | 2                       | 40            | >150            | 8             | n.i.      |
| Scaff10-4          |    | 417.43     | 5.32  |    | -                     | 2                       | 40            | >150            | 6             | n.i.      |
| Scaff10-5          |    | 399.41     | 6.03  |    | -                     | 2                       | 65            | >150            | 8             | 71        |
| Scaff10-6          |  | 396.39     | 3.65  |  | -                     | 2                       | 100           | >150            | 7             | n.i.      |
| Scaff10-7          |  | 424.44     | 4.22  |  | -                     | 7                       | 70            | 40              | 6             | 75        |

| Scaff10 derivative | Structure                                                                           | MW [g/mol] | log P | HTRF assay                                                                           |                       |                         | Solubility    |                 | Scaff10 class | Yield [%] |
|--------------------|-------------------------------------------------------------------------------------|------------|-------|--------------------------------------------------------------------------------------|-----------------------|-------------------------|---------------|-----------------|---------------|-----------|
|                    |                                                                                     |            |       | Disruption of the PPI                                                                | IC <sub>50</sub> [μM] | Number of exp. in dupl. | 2 % DMSO [μM] | 0.3 % DMSO [μM] |               |           |
| Scaff10-8          | 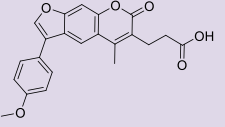   | 378.37     | 4.36  |    | 34.1±1.7              | 15                      | 50            | 30              | 8             | 80        |
| Scaff10-9          |    | 680.77     | 2.18  |    | -                     | 2                       | n.d.          | n.d.            | 6             | n.i.      |
| Scaff10-10         |    | 503.52     | 5.53  |    | -                     | 2                       | 30            | >150            | 6             | 66        |
| Scaff10-11         |  | 475.47     | 4.95  |  | -                     | 2                       | 20            | >150            | 7             | n.i.      |
| Scaff10-12         |  | 358.39     | 4.94  |  | -                     | 4                       | 70            | 40              | 6             | 777       |

| Scaff10 derivative | Structure                                                                           | MW [g/mol] | log P | HTRF assay                                                                          |                       |                         | Solubility    |                 | Scaff10 class | Yield [%] |
|--------------------|-------------------------------------------------------------------------------------|------------|-------|-------------------------------------------------------------------------------------|-----------------------|-------------------------|---------------|-----------------|---------------|-----------|
|                    |                                                                                     |            |       | Disruption of the PPI                                                               | IC <sub>50</sub> [μM] | Number of exp. in dupl. | 2 % DMSO [μM] | 0.3 % DMSO [μM] |               |           |
| Scaff10-13         | 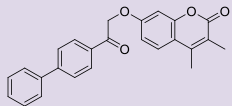   | 384.42     | 5.55  |   | -                     | 3                       | 90            | 75              | 6             | 92        |
| Scaff10-14         |    | 400.42     | 5.59  |   | -                     | 2                       | 100           | >150            | 6             | 97        |
| Scaff10-15         |    | 388.41     | 4.92  |   | -                     | 2                       | 35            | 40              | 6             | n.i.      |
| Scaff10-17         |  | 486.51     | 5.80  |  | -                     | 2                       | 30            | >30             | 6             | n.i.      |
| Scaff10-20         |  | 534.56     | 5.60  | n.d.                                                                                | n.d.                  | 0                       | n.d.          | n.d.            | 6             | 7         |

| Scaff10 derivative | Structure                                                                           | MW [g/mol] | log P | HTRF assay                                                                           |                       |                         | Solubility    |                 | Scaff10 class | Yield [%] |
|--------------------|-------------------------------------------------------------------------------------|------------|-------|--------------------------------------------------------------------------------------|-----------------------|-------------------------|---------------|-----------------|---------------|-----------|
|                    |                                                                                     |            |       | Disruption of the PPI                                                                | IC <sub>50</sub> [μM] | Number of exp. in dupl. | 2 % DMSO [μM] | 0.3 % DMSO [μM] |               |           |
| Scaff10-25         | 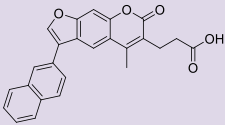   | 398.41     | 5.28  |    | -                     | 5                       | 20            | >30             | 8             | 22        |
| Scaff10-26         |    | 405.44     | 4.02  |    | -                     | 2                       | 50            | >150            | 8             | 75        |
| Scaff10-27         |    | 454.47     | 4.24  |    | -                     | 2                       | 10            | >30             | 8             | 79        |
| Scaff10-28         |  | 462.42     | 5.18  |   | -                     | 2                       | 50            | 75              | 6             | 5         |
| Scaff10-29         |  | 434.36     | 4.61  |  | -                     | 2                       | 100           | >30             | 7             | 18        |



| Scaff10 derivative | Structure                                                                           | MW [g/mol] | log P | HTRF assay                                                                           |                       |                         | Solubility    |                 | Scaff10 class | Yield [%] |
|--------------------|-------------------------------------------------------------------------------------|------------|-------|--------------------------------------------------------------------------------------|-----------------------|-------------------------|---------------|-----------------|---------------|-----------|
|                    |                                                                                     |            |       | Disruption of the PPI                                                                | IC <sub>50</sub> [μM] | Number of exp. in dupl. | 2 % DMSO [μM] | 0.3 % DMSO [μM] |               |           |
| Scaff10-30         | 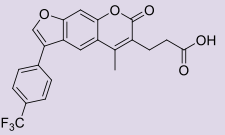   | 416.35     | 5.19  |    | 47.8±7.8              | 6                       | >100          | n.d.            | 8             | 6         |
| Scaff10-31         |    | 395.41     | 3.09  |    | -                     | 2                       | 100           | >150            | 6             | n.i.      |
| Scaff10-32         |    | 349.34     | 3.10  |    | -                     | 2                       | >100          | >150            | 8             | 31        |
| Scaff10-34         |  | 437.48     | 4.40  |   | -                     | 2                       | 10            | 40              | 6             | 40        |
| Scaff10-35         |  | 409.43     | 3.83  |  | -                     | 2                       | >100          | >150            | 7             | 26        |

| Scaff10 derivative | Structure                                                                           | MW [g/mol] | log P | HTRF assay                                                                           |                       |                         | Solubility    |                 | Scaff10 class | Yield [%] |
|--------------------|-------------------------------------------------------------------------------------|------------|-------|--------------------------------------------------------------------------------------|-----------------------|-------------------------|---------------|-----------------|---------------|-----------|
|                    |                                                                                     |            |       | Disruption of the PPI                                                                | IC <sub>50</sub> [μM] | Number of exp. in dupl. | 2 % DMSO [μM] | 0.3 % DMSO [μM] |               |           |
| Scaff10-37         | 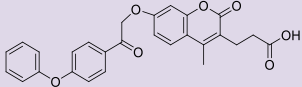   | 458.46     | 5.23  |    | -                     | 2                       | 30            | n.d.            | 7             | 7         |
| Scaff10-38         |    | 440.44     | 5.81  |    | 36.7±3.3              | 4                       | 100           | >150            | 8             | 9         |
| Scaff10-39         |    | 470.51     | 5.76  |    | -                     | 2                       | 10            | 20              | 6             | 96        |
| Scaff10-40         |  | 442.46     | 5.19  |   | 20.8±2.6              | 5                       | 15            | 10              | 7             | 35        |
| Scaff10-41         |  | 424.44     | 5.77  |  | 29.1±2.6              | 7                       | 50            | n.d.            | 8             | 34        |

| Scaff10 derivative | Structure | MW [g/mol] | log P | HTRF assay            |                       |                         | Solubility    |                 | Scaff10 class | Yield [%] |
|--------------------|-----------|------------|-------|-----------------------|-----------------------|-------------------------|---------------|-----------------|---------------|-----------|
|                    |           |            |       | Disruption of the PPI | IC <sub>50</sub> [μM] | Number of exp. in dupl. | 2 % DMSO [μM] | 0.3 % DMSO [μM] |               |           |
| Scaff10-42         |           | 474.50     | 5.13  |                       | -                     | 2                       | 10            | 40              | 6             | n.i.      |
| Scaff10-43         |           | 446.45     | 4.56  |                       | -                     | 2                       | n.d.          | n.d.            | 7             | 25        |
| Scaff10-44         |           | 428.43     | 5.27  |                       | 20.7±2.5              | 5                       | 15            | 40              | 8             | 52        |
| Scaff10-45         |           | 457.45     | 5.53  |                       | -                     | 5                       | 10            | >150            | 8             | 24        |
| Scaff10-46         |           | 366.41     | 6.13  |                       | -                     | 2                       | 15            | >150            | 8             | 25        |

| Scaff10 derivative      | Structure                                                                           | MW [g/mol] | log P | HTRF assay                                                                           |                       |                         | Solubility    |                 | Scaff10 class | Yield [%] |
|-------------------------|-------------------------------------------------------------------------------------|------------|-------|--------------------------------------------------------------------------------------|-----------------------|-------------------------|---------------|-----------------|---------------|-----------|
|                         |                                                                                     |            |       | Disruption of the PPI                                                                | IC <sub>50</sub> [μM] | Number of exp. in dupl. | 2 % DMSO [μM] | 0.3 % DMSO [μM] |               |           |
| Scaff10-47              | 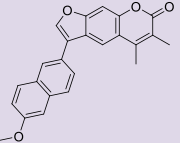   | 370.40     | 5.51  |    | -                     | 3                       | 15            | >150            | 8             | n.i.      |
| Scaff10-48              |    | 392.40     | 4.59  |    | -                     | 3                       | 30            | 75              | 8             | 15        |
| Scaff10-49 <sup>1</sup> |    | 364.35     | 3.90  |    | 56.4±4.5              | 4                       | >100          | >150            | 8             |           |
| Scaff10-50 <sup>1</sup> |  | 392.40     | 4.85  |  | 26.8±3.5              | 4                       | 70            | >150            | 8             |           |
| Scaff10-51              |  | 393.39     | 3.74  |  | -                     | 4                       | 20            | 40              | 8             | 6         |

| Scaff10 derivative            | Structure | MW [g/mol] | log P | HTRF assay            |                       |                         | Solubility    |                 | Scaff10 class | Yield [%] |
|-------------------------------|-----------|------------|-------|-----------------------|-----------------------|-------------------------|---------------|-----------------|---------------|-----------|
|                               |           |            |       | Disruption of the PPI | IC <sub>50</sub> [μM] | Number of exp. in dupl. | 2 % DMSO [μM] | 0.3 % DMSO [μM] |               |           |
| Scaff10-52                    |           | 410.42     | 4.00  |                       | -                     | 3                       | 100           | >150            | 6             | n.i.      |
| Scaff10-52 dimer <sup>1</sup> |           | 544.55     | 5.43  |                       | -                     | 3                       | 80            | >150            | 6             | n.i.      |
| Scaff10-56                    |           | 394.40     | 4.24  |                       | -                     | 3                       | 90            | 40              | 6             | 5         |
| Scaff10-58                    |           | 348.35     | 4.38  |                       | 66.7±7.5              | 3                       | >100          | >150            | 8             | 56        |
| Scaff10-59                    |           | 396.43     | 4.55  |                       | -                     | 3                       | 30            | 40              | 6             | n.i.      |

| Scaff10 derivative | Structure                                                                           | MW [g/mol] | log P | HTRF assay                                                                           |                       |                         | Solubility    |                 | Scaff10 class | Yield [%] |
|--------------------|-------------------------------------------------------------------------------------|------------|-------|--------------------------------------------------------------------------------------|-----------------------|-------------------------|---------------|-----------------|---------------|-----------|
|                    |                                                                                     |            |       | Disruption of the PPI                                                                | IC <sub>50</sub> [μM] | Number of exp. in dupl. | 2 % DMSO [μM] | 0.3 % DMSO [μM] |               |           |
| Scaff10-60         | 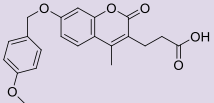   | 368.38     | 3.98  |    | -                     | 4                       | 100           | >150            | 7             | n.i.      |
| Scaff10-61         |    | 435.43     | 3.46  |    | 64.0±6.0              | 4                       | n.d.          | >150            | 8             | 6         |
| Scaff10-62         |    | 500.54     | 5.74  |    | -                     | 2                       | 10            | 10              | 6             | 71        |
| Scaff10-63         |  | 472.49     | 5.17  |  | 24.4±8.4              | 3                       | 30            | 75              | 7             | 26        |

| Scaff10 derivative | Structure                                                                         | MW [g/mol] | log P | HTRF assay                                                                         |                       |                         | Solubility    |                 | Scaff10 class | Yield [%] |
|--------------------|-----------------------------------------------------------------------------------|------------|-------|------------------------------------------------------------------------------------|-----------------------|-------------------------|---------------|-----------------|---------------|-----------|
|                    |                                                                                   |            |       | Disruption of the PPI                                                              | IC <sub>50</sub> [μM] | Number of exp. in dupl. | 2 % DMSO [μM] | 0.3 % DMSO [μM] |               |           |
| Scaff10-64         | 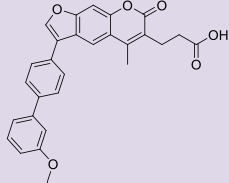 | 454.47     | 5.75  |  | 28.9±9.3              | 3                       | 70            | >150            | 8             | 21        |

## 2 Material and Methods

All chemicals used for preparing buffers and solutions were obtained from Sigma-Aldrich (Taufkirchen, DE) or Carl Roth GmbH & Co. KG (Karlsruhe, DE), unless indicated otherwise. All buffers were prepared with *A. dest.*

### 2.1 Cell lines

Human embryonic kidney cells (HEK293) were cultured in DMEM supplemented with 10 % fetal calf serum (FCS) and 1 % Penicillin/streptomycin (100 U/ml). Mouse collecting duct cells (MCD4) stably expressing human AQP2[5] were cultured in DMEM/F-12 supplemented with 5 % FCS and 5  $\mu$ M dexamethasone. Rat embryonic myoblast cells (H9C2) were cultured in DMEM supplemented with 10 % FCS and 1 % Penicillin/streptomycin (100 U/ml). Human neuroblastoma cells (SH-SY5Y) were cultured in DMEM/F-12 supplemented with 10 % FCS and 1 % Penicillin/streptomycin (100 U/ml). Human breast adenocarcinoma cells (MCF-7) were cultured in DMEM supplemented with 10 % FCS and 1 % Penicillin/streptomycin (100 U/ml). Human embryonic kidney cells (HEK293-EBNA) stably expressing the Epstein Barr virus (EBV) EBNA-1 gene from pCMV/EBNA controlled by the CMV promoter[6, 7] is a suspension cell line and was cultured in Freestyle F17 supplemented with 0.5 % peptone and 1 % Penicillin/streptomycin (100 U/ml) and transfected using PEI. Inner medullary collecting duct (IMCD) cells from rats were prepared as described.[8, 9] In brief, 10 to 12 weeks old rats (Wistar Han, Charles River Laboratories International, Inc., Sulzfeld, DE) were anesthetized and decapitated. Inner medullae were dissected and digested enzymatically with hyaluronidase and collagenase. Cells were resuspended in fully supplemented medium (DMEM supplemented with 1% non-essential aminoacids, 1 % ultrosor G, 500  $\mu$ M DBcAMP, 20 U/ml nystatin, 0.25  $\mu$ g/ml gentamicin, 1.5 g/l glucose, 100 mM NaCl and 100 mM urea) and seeded in collagen type IV (BD Biosciences, Heidelberg, DE; #356233)-coated dishes. Six (biotinylation) to 13 (Rhotekin assay) days after seeding, cells were used for experiments. 24 h before starting the experiment, cells were incubated in medium without DBcAMP and nystatin in order to increase the perinuclear localization of AQP2.

### 2.2 Plasmids

The AKAP-Lbc/DPPH sequence fused to an N-terminal GFP-tag and to C-terminal His<sub>6</sub>-tag was subcloned into the pTT5 plasmid (ampicillin resistance) containing a secretion sequence derived from an immunoglobulin (human IgG<sub>1</sub>).[10] The full-length sequence refers to a secretion sequence derived from an immunoglobulin (bp 1-56 of accession number



KT365995 of the NCBI database) – GFP (coding for bp 7756-8472 of pEGFP-N1-Pdx1, KU341334.1 of the NCBI database) – AKAP-Lbc/DHPH (bp 5914-7026 of accession number CCDS 32320.1 of the NCBI database) – His<sub>6</sub>. 8 mutations (Supplemental Figure 2) were included into the AKAP-Lbc/DHPH sequence to remove back-to-back rare codons in a row by mutagenesis using the KOD DNA polymerase and the following primers. Each primer pair inserted two mutations.

M1 Fw 5'- GTCGGATCATCGACAGCAAGTTTC-3'

M1 Rv 5'-GCTGTTCGATGATCCGACTCCAAGACTCTGC-3'

M2 Fw 5'-GGCAAGAAGTGATCTATGAGTTGATGCAG-3'

M2 Rv 5'-CTCATAGATCACTTCTTGCCGTTTGACC-3'

M3 Fw 5'-GAATGCAGAACGGCTGAAGAAGACATATGGC-3'

M3 Rv 5'-CTTCTTCAGCCGTTCTGCATTCTCACC-3'

M4 Fw 5'-GAAGCTTGTGCGGGATGGGAGTGTGTTTC-3'

M4 Rv 5'-CTCCCATCCCGCACAAAGCTTCTTCCGTTTCAAATC-3'.

## 2.3 Luciferase reporter assays

Luciferase reporter assays were carried out according to the manufacturer's protocol "*Dual-luciferase reporter assay*" (Promega). In brief, HEK293-Zellen were transiently transfected to express two luciferases and the indicated GEFs (Supplemental Figure 1). The serum response element (SRE-) promoter controls the firefly luciferase. Active RhoA stimulates *serum response factor* (SRF), which in turn binds to the SRE and stimulates expression of *firefly* luciferase. 20 hours post transfection the cells were exposed to Scaf10 and another 4 hours later they were lysed in Passive Lysis Buffer (Promega). Luciferase activity, i.e. luminescence signals, was measured in 96- well plates (*OptiPlate 96*, PerkinElmer) and the *LarII*- or *Stop-&Glow* substrate solutions (PerkinElmer) in a microtiter plate reader.

## 2.4 Chemical synthesis

### 2.4.1 <sup>1</sup>H NMR

<sup>1</sup>H NMR spectra were recorded on a Bruker AV 300 (1H: 300 MHz). Chemical shifts are depicted in parts per million (ppm). As internal standard, the measured NMR-spectra were normalised to the solvent peak used for recording the spectrum (dimethylsulfoxide-d<sub>6</sub> (DMSO): 1H: 2.50 ppm).

### 2.4.2 LC/MS

All mass spectra were recorded on a QTrap 4000 (Applied Biosystems) connected to a Shimadzu UFLC system. Electrospray ionization (ESI) was used to carry out ionization of an

approximately 1  $\mu\text{M}$  solution of the sample in pure ACN or ACN/H<sub>2</sub>O (1:1). Values are depicted as atomic mass units  $m/z$ . The system is equipped with a Shimadzu LC-20 system (degasser Degasys DG-2410, Autosampler SIL-20A, Controller CBM-20A) with a DAD-UV-detector (SPD-M20A). LC/MS runs were performed on an analytical Nucleodur column (100-5 C18 ec, 100 Å, 5  $\mu\text{m}$ , 50 x 4 mm, Macherey-Nagel). The flow rate was set to 1 ml/min and column temperature to 40 °C. Injection volumes were set between 10  $\mu\text{l}$  and 20  $\mu\text{l}$  with an approximate sample concentration of 50  $\mu\text{M}$ . Analytical LC/MS runs were performed with the following gradient: water/0.1 % formic acid (v/v) (solvent A) and ACN/0.1 % formic acid (v/v) (solvent B), 5 % B to 95 % B. Overall run time was set to 5 (cellular uptake) or 11 minutes (min) (chemical synthesis), detection wavelength: 254 nm for chemical synthesis and 308 nm for cellular uptake (absorption maximum of Scaff10 derivatives). Purity was determined based on the chromatograms of an LC/MS run. All compounds used in *in vitro* or *in vivo* tests had a purity of >95%. Absorption maxima were extracted from spectra generated by the DAD detector during LC/MS analyses.

### 2.4.3 HPLC

The preparative HPLC system consisted of a Shimadzu LC-20 system (degasser Degasys DG-2410, Autosampler SIL-20A HT, Controller CBM-20A) with a DAD-UV-detector (SPD-M20A). Preparative separations were performed on a Nucleodur C-18 column (100 Å, 10 x 250 mm x 21 mm, Macherey-Nagel) with the flow rate set to 8.0 ml/min. Semi-preparative separations were performed on a Nucleodur C-18 column (100 Å, 10  $\mu\text{m}$  250 mm x 10 mm, Macherey-Nagel) with the flow rate set to 2.0 ml/min. Water/0.1 % acetic acid (v/v) (solvent A); ACN/0.1 % acetic acid (v/v) (solvent B).

### 3 References

1. Tamma G, Wiesner B, Furkert J, Hahm D, Oksche A, Schaefer M, et al. The prostaglandin E2 analogue sulprostone antagonizes vasopressin-induced antidiuresis through activation of Rho. *J Cell Sci.* 2003;116(Pt 16):3285-94. Epub 2003/06/28. doi: 10.1242/jcs.00640jcs.00640 [pii]. PubMed PMID: 12829746.
2. Lutz S, Freichel-Blomquist A, Yang Y, Rumenapp U, Jakobs KH, Schmidt M, et al. The guanine nucleotide exchange factor p63RhoGEF, a specific link between Gq/11-coupled receptor signaling and RhoA. *J Biol Chem.* 2005;280(12):11134-9. doi: 10.1074/jbc.M411322200. PubMed PMID: 15632174.
3. Mohl M, Winkler S, Wieland T, Lutz S. Gef10--the third member of a Rho-specific guanine nucleotide exchange factor subfamily with unusual protein architecture. *Naunyn Schmiedebergs Arch Pharmacol.* 2006;373(5):333-41. doi: 10.1007/s00210-006-0083-0. PubMed PMID: 16896804.
4. Pfreimer M, Vatter P, Langer T, Wieland T, Gierschik P, Moepps B. LARG links histamine-H1-receptor-activated Gq to Rho-GTPase-dependent signaling pathways. *Cell Signal.* 2012;24(3):652-63. doi: 10.1016/j.cellsig.2011.10.014. PubMed PMID: 22100544.
5. Bogum J, Faust D, Zuhlke K, Eichhorst J, Moutty MC, Furkert J, et al. Small-molecule screening identifies modulators of aquaporin-2 trafficking. *J Am Soc Nephrol.* 2013;24(5):744-58. doi: 10.1681/ASN.2012030295. PubMed PMID: 23559583; PubMed Central PMCID: PMC3636789.
6. DuBridges RB, Tang P, Hsia HC, Leong PM, Miller JH, Calos MP. Analysis of mutation in human cells by using an Epstein-Barr virus shuttle system. *Mol Cell Biol.* 1987;7(1):379-87. PubMed PMID: 3031469; PubMed Central PMCID: PMC365079.
7. Durocher Y, Perret S, Kamen A. High-level and high-throughput recombinant protein production by transient transfection of suspension-growing human 293-EBNA1 cells. *Nucleic acids research.* 2002;30(2):E9. PubMed PMID: 11788735; PubMed Central PMCID: PMC99848.
8. Maric K, Oksche A, Rosenthal W. Aquaporin-2 expression in primary cultured rat inner medullary collecting duct cells. *Am J Physiol.* 1998;275(5 Pt 2):F796-801. Epub 1998/11/14. PubMed PMID: 9815137.
9. Faust D, Geelhaar A, Eisermann B, Eichhorst J, Wiesner B, Rosenthal W, et al. Culturing primary rat inner medullary collecting duct cells. *Journal of visualized experiments : JoVE.* 2013;(76). doi: 10.3791/50366. PubMed PMID: 23852264.
10. Zhang J, Liu X, Bell A, To R, Baral TN, Azizi A, et al. Transient expression and purification of chimeric heavy chain antibodies. *Protein expression and purification.* 2009;65(1):77-82. doi: 10.1016/j.pep.2008.10.011. PubMed PMID: 19007889.

## 4 Medicinal Chemistry

### 4.1 Chemical synthesis

#### 4.1.1 Iodo-1-[4-(3-methoxyphenyl)phenyl]ethanone (**2a**)

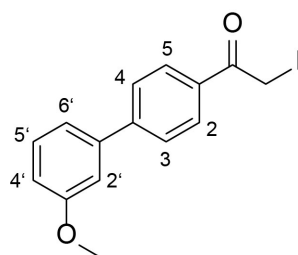

1-(3'-Methoxybiphenyl-4-yl)ethanone (**1**) (400 mg, 1.77 mmol) and iodine (1.8 g, 7.07 mmol) were solved in 10 ml methanol and refluxed for 2 h. 150 ml water and 75 ml ethyl acetate were added as well as 10 % Na<sub>2</sub>SO<sub>3</sub>-solution until iodine was completely reduced. The aqueous layer was extracted thrice with 75 ml ethyl acetate. The organic layers were collected and the product was dried under reduced pressure. Final product gave an orange-yellowish solid in 80 % yield (526 mg).

<sup>1</sup>H NMR (300 MHz, DMSO-d<sub>6</sub>): δ(ppm) = 2.56 –2.67 (s, 2H, -CO-CH<sub>2</sub>-I), 3.75 –3.90 (m, 3H, -OCH<sub>3</sub>), 6.96 –7.05 (d, J = 7.32 Hz, 1H, H-4'), 7.24 –7.35 (m, 2H, H-2',-6'), 7.38 – 7.47 (t, J = 7.32 Hz, 1H, H-5'), 7.80 – 7.86 (d, J = 8.54 Hz, 2H, H-3, -4), 7.99 – 8.06 (d, J = 8.55 Hz, 2H, H-2, -5)

ESI-MS: calculated (cal.) 353.00, experimental (exp.) 352.9 ([M+H]<sup>+</sup>)

HPLC: 84 % purity at 254 nm

t<sub>R</sub> (HPLC): 7.32 min; λ<sub>max</sub> = 253 nm and 303 nm

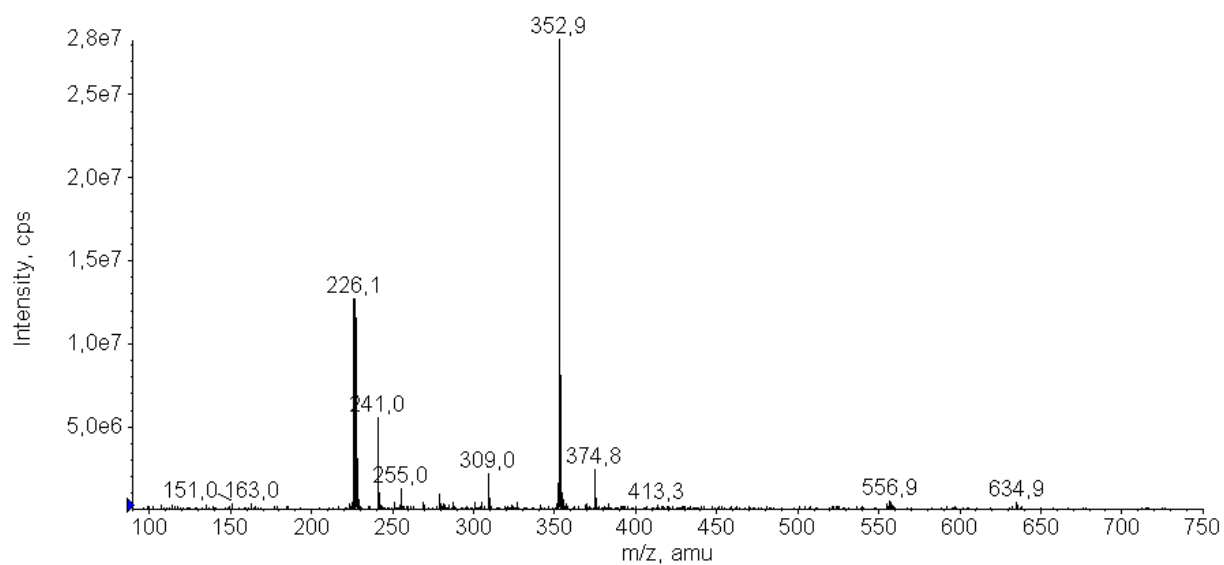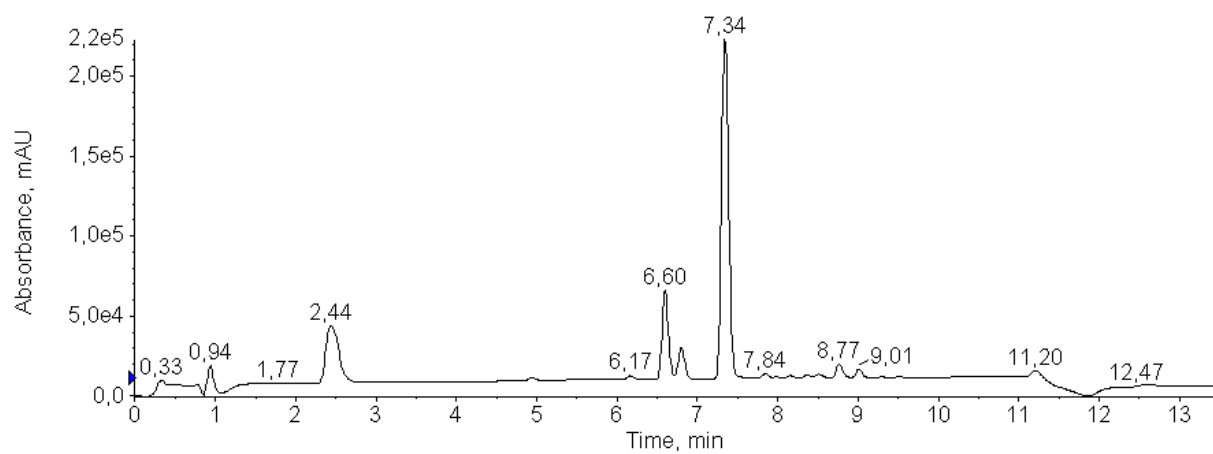

**Supporting Information Figure 1:** LC/MS analysis of **2a**. Upper panel: Mass spectrum. Lower panel: according chromatogram.

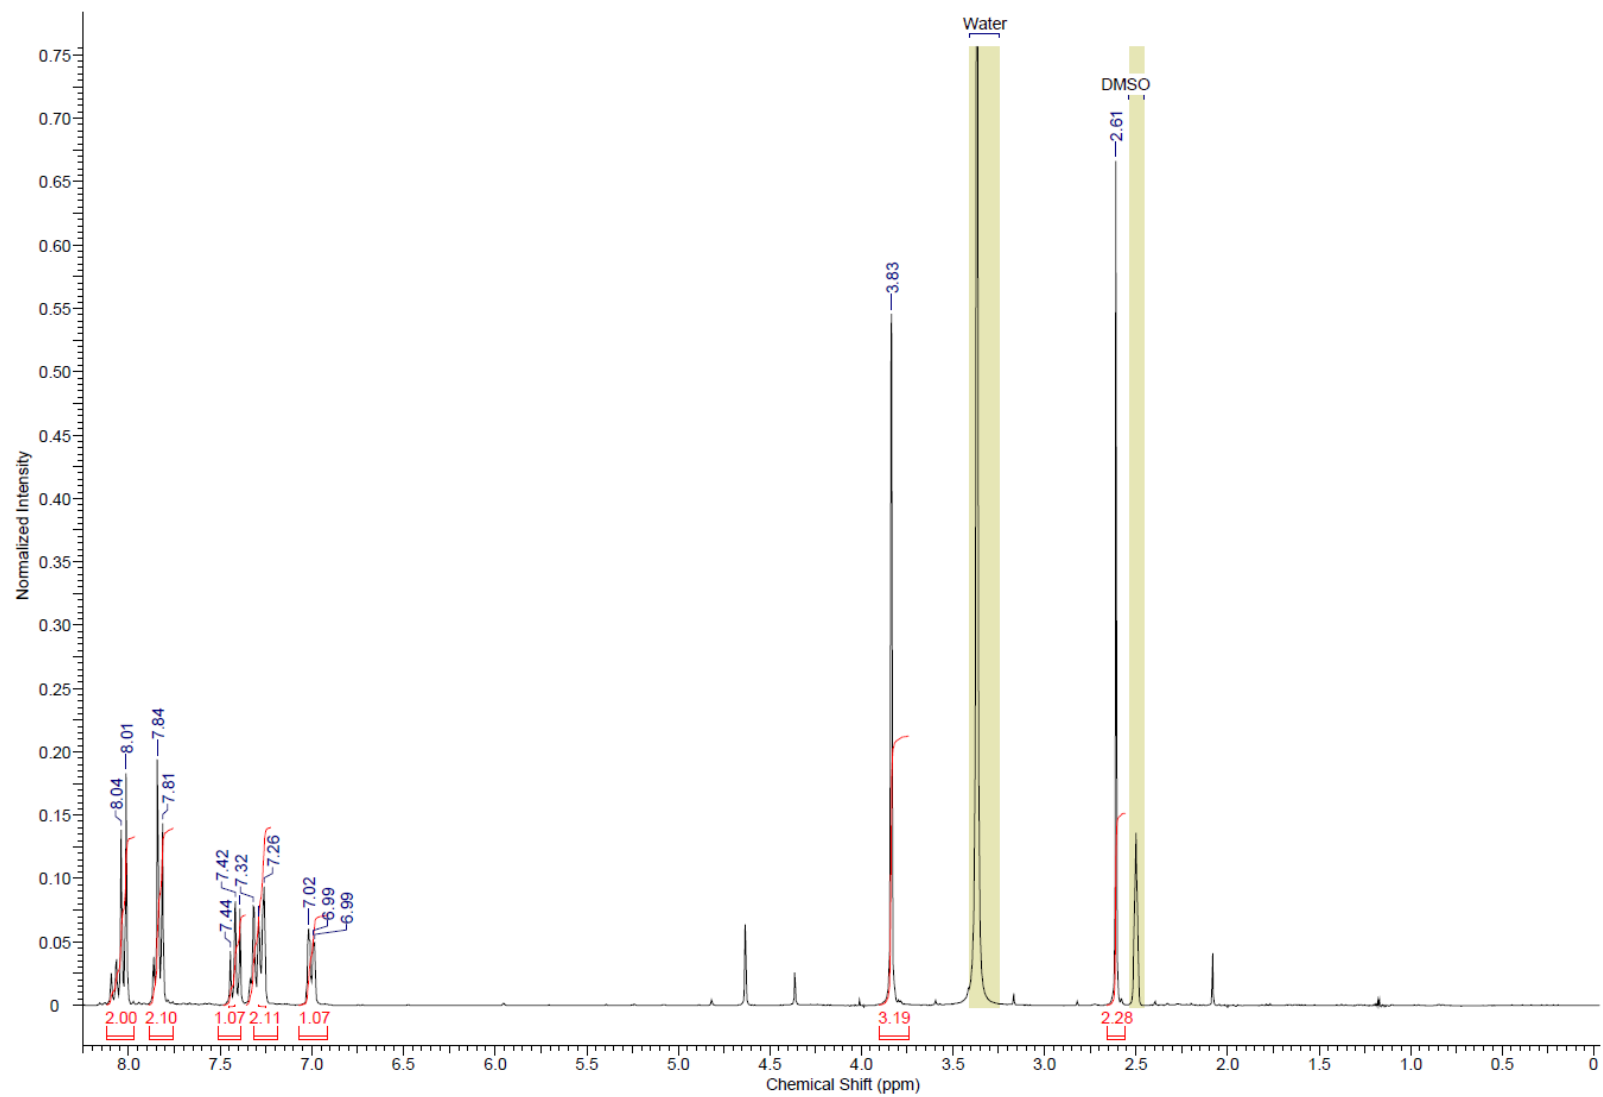

Supporting Information Figure 2:  $^1\text{H}$  NMR spectrum of **2a**, 300 MHz,  $\text{DMSO-d}_6$ .

4.1.2 Ethyl 3-(7-hydroxy-4-methyl-2-oxo-chromen-3-yl)propanoate (**5a**)

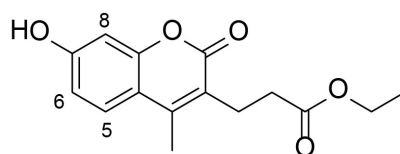

Resorcinol (**3**) (4 g, 36.3 mmol) and diethyl2-acetylglutarat (**4**) (8 ml, 37.2 mmol, 1.07 g/ml) were solved in 7 ml HCl (1.25 M) in ethanol under nitrogen atmosphere. The reaction mixture was cooled (0 °C) for 3 h and reacted overnight at room temperature. The solution was poured into 200 ml of ice water and the product was extracted thrice with 50 ml methylene chloride. The organic layers were collected and recrystallised in ethyl acetate. Yellowish crystals formed overnight at 8 °C. Final yield was 79 % (7.9 g).

$^1\text{H}$  NMR (300 MHz, DMSO- $d_6$ ):  $\delta$ (ppm) = 1.08 – 1.25 (t,  $J$  = 7.32 Hz, 3H,  $-\text{CH}_2-\text{CH}_3$ ), 2.35 – 2.42 (s, 3H, Ar- $\text{CH}_3$ ), 2.43 – 2.50 (t,  $J$  = 7.32 Hz, 2H,  $-\text{CH}_2-\text{CH}_2-\text{COOEt}$ ), 2.74 - 2.87 (t,  $J$  = 7.32 Hz, 2H,  $-\text{CH}_2-\text{CH}_2-\text{COOEt}$ ), 4.00 – 4.12 (q,  $J$  = 7.32 Hz, 2H,  $-\text{CH}_2-\text{CH}_3$ ), 6.65 – 6.74 (s, 1H, H-8), 6.77 – 6.85 (dd,  $J$  = 2.44 Hz, 8.54 Hz, 1H, H-6), 7.59 – 7.69 (d,  $J$  = 2.44 Hz, 1H, H-5), 10.35 – 10.59 (s, 1H, OH)

ESI-MS: cal. 277.10, exp. 277.1 ( $[\text{M}+\text{H}]^+$ )

HPLC: 99 % purity at 254 nm

$t_R$  (HPLC): 4.94 min;  $\lambda_{\text{max}}$  = 323 nm

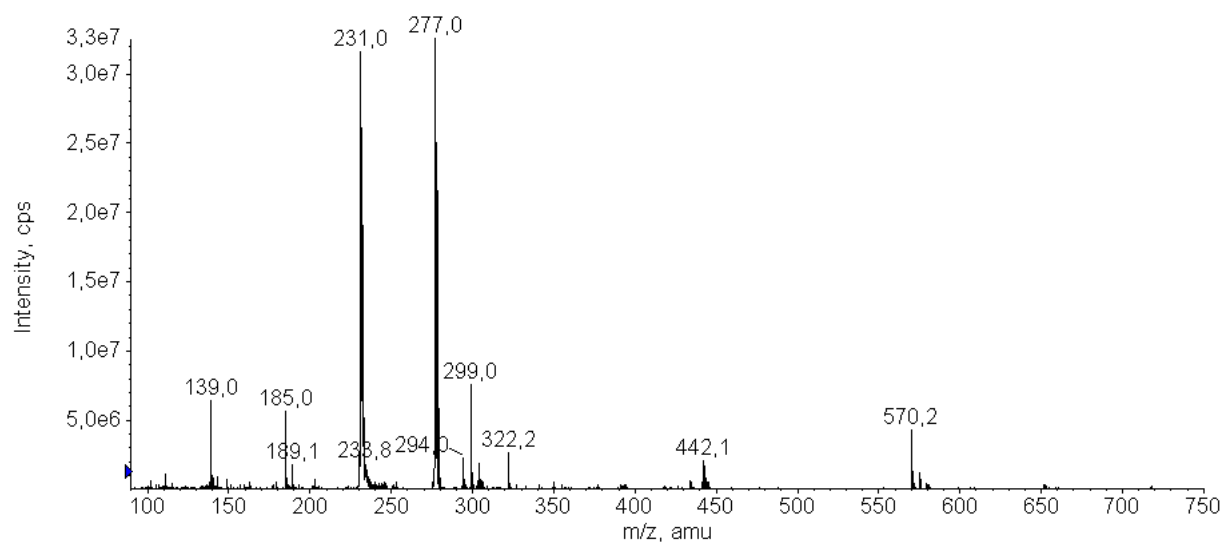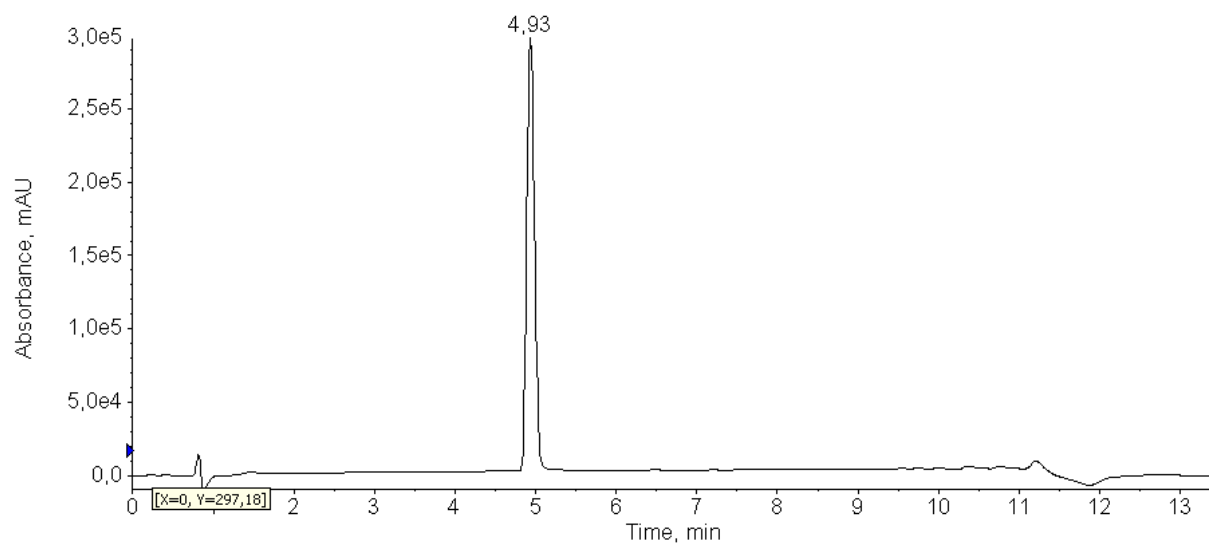

**Supporting Information Figure 3:** LC/MS analysis of **5a**. Upper panel: Mass spectrum. Lower panel: according chromatogram.



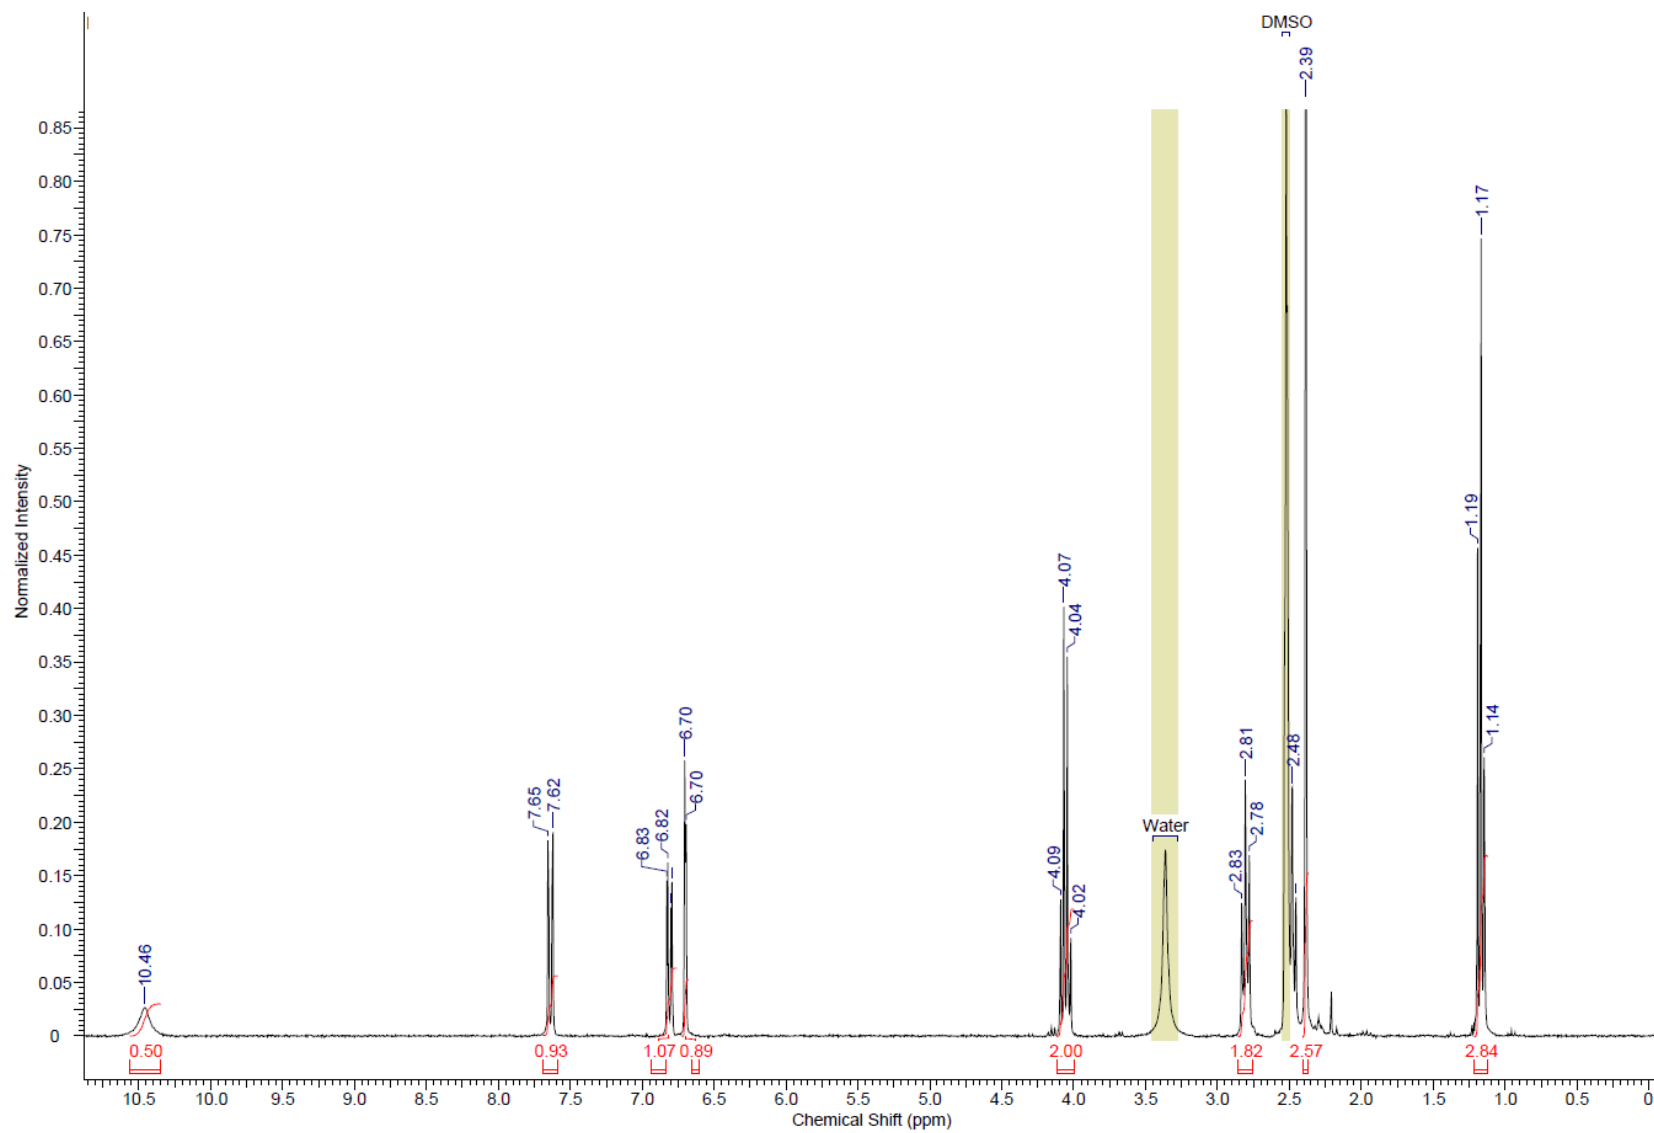

Supporting Information Figure 4:  $^1\text{H}$  NMR spectrum of **5a**, 300 MHz,  $\text{DMSO-d}_6$ .

4.1.3 [2-(4-Methoxyphenyl)-2-oxo-ethoxy]-3,4-dimethyl-chromen-2-one (**AE168**)

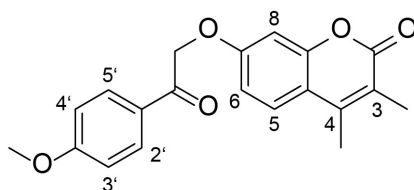

7-Hydroxy-3,4-dimethyl-chromen-2-one (**5b**) (200 mg, 1.05 mmol) was solved in acetone and preactivated with potash in excess (363 mg, 2.63 mmol) by 55 °C. The  $\alpha$ -haloketone 2-bromo-1-(4-methoxyphenyl)ethanone (**2b**) was added (263 mg, 1.15 mmol). The mixture was refluxed at the same temperature. The final product after purification gave a white solid in 62 % yield (220 mg).

$^1\text{H NMR}$  (300 MHz,  $\text{DMSO-d}_6$ ):  $\delta(\text{ppm}) = 1.20 - 1.28$  (s, 3H, -C3- $\text{CH}_3$ ), 1.50 – 1.58 (s, 3H, -C4- $\text{CH}_3$ ), 2.98 – 3.08 (s, 3H, - $\text{OCH}_3$ ), 4.78 – 4.84 (s, 2H, - $\text{CO-CH}_2\text{-OAr}$ ), 6.12 – 6.19 (m, 2H, H-6, -8), 6.23 – 6.30 (d,  $J = 9.16$  Hz, 2H, H-3', -4'), 6.83 – 6.89 (d,  $J = 8.55$  Hz, 1H, H-5), 7.15 – 7.22 (d,  $J = 9.16$  Hz, 2H, H-2', -5')

ESI-MS: cal. 339.12, exp. 339.0 ( $[\text{M}+\text{H}]^+$ )

HPLC: 98 % purity at 254 nm

$t_{\text{R}}$  (HPLC): 5.43 min;  $\lambda_{\text{max}} = 272$  nm and 314 nm

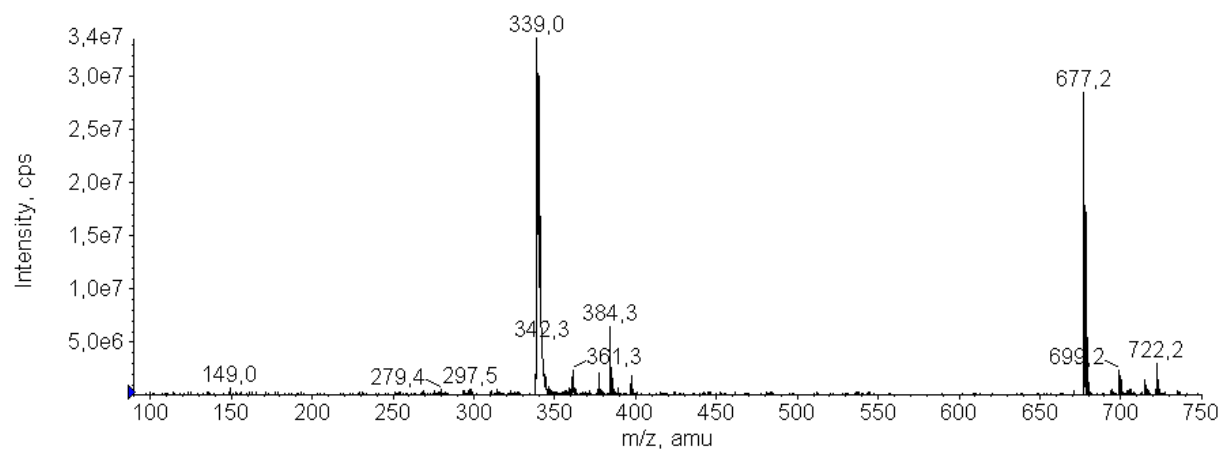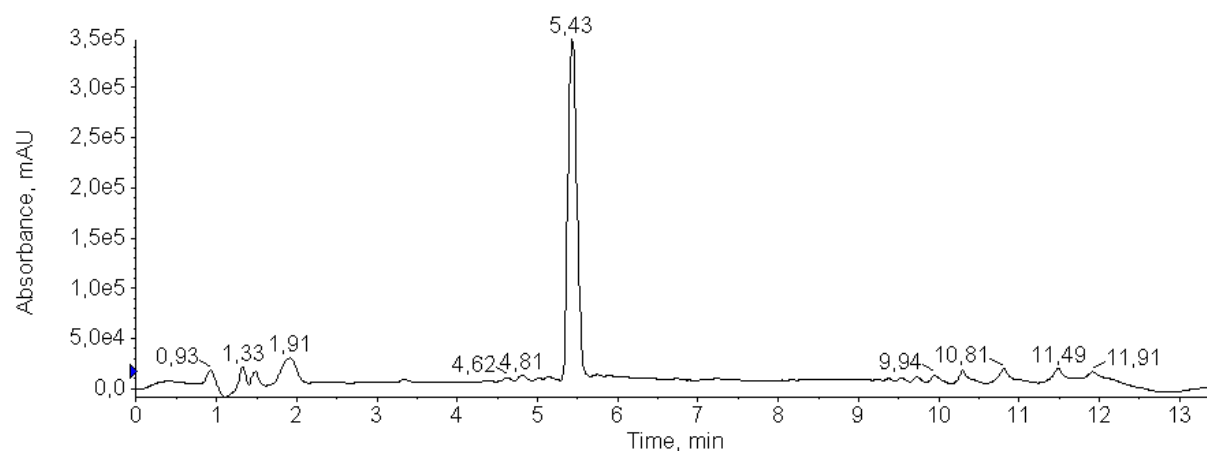

**Supporting Information Figure 5:** LC/MS analysis of **AE168**. Upper panel: Mass spectrum. Lower panel: according chromatogram.

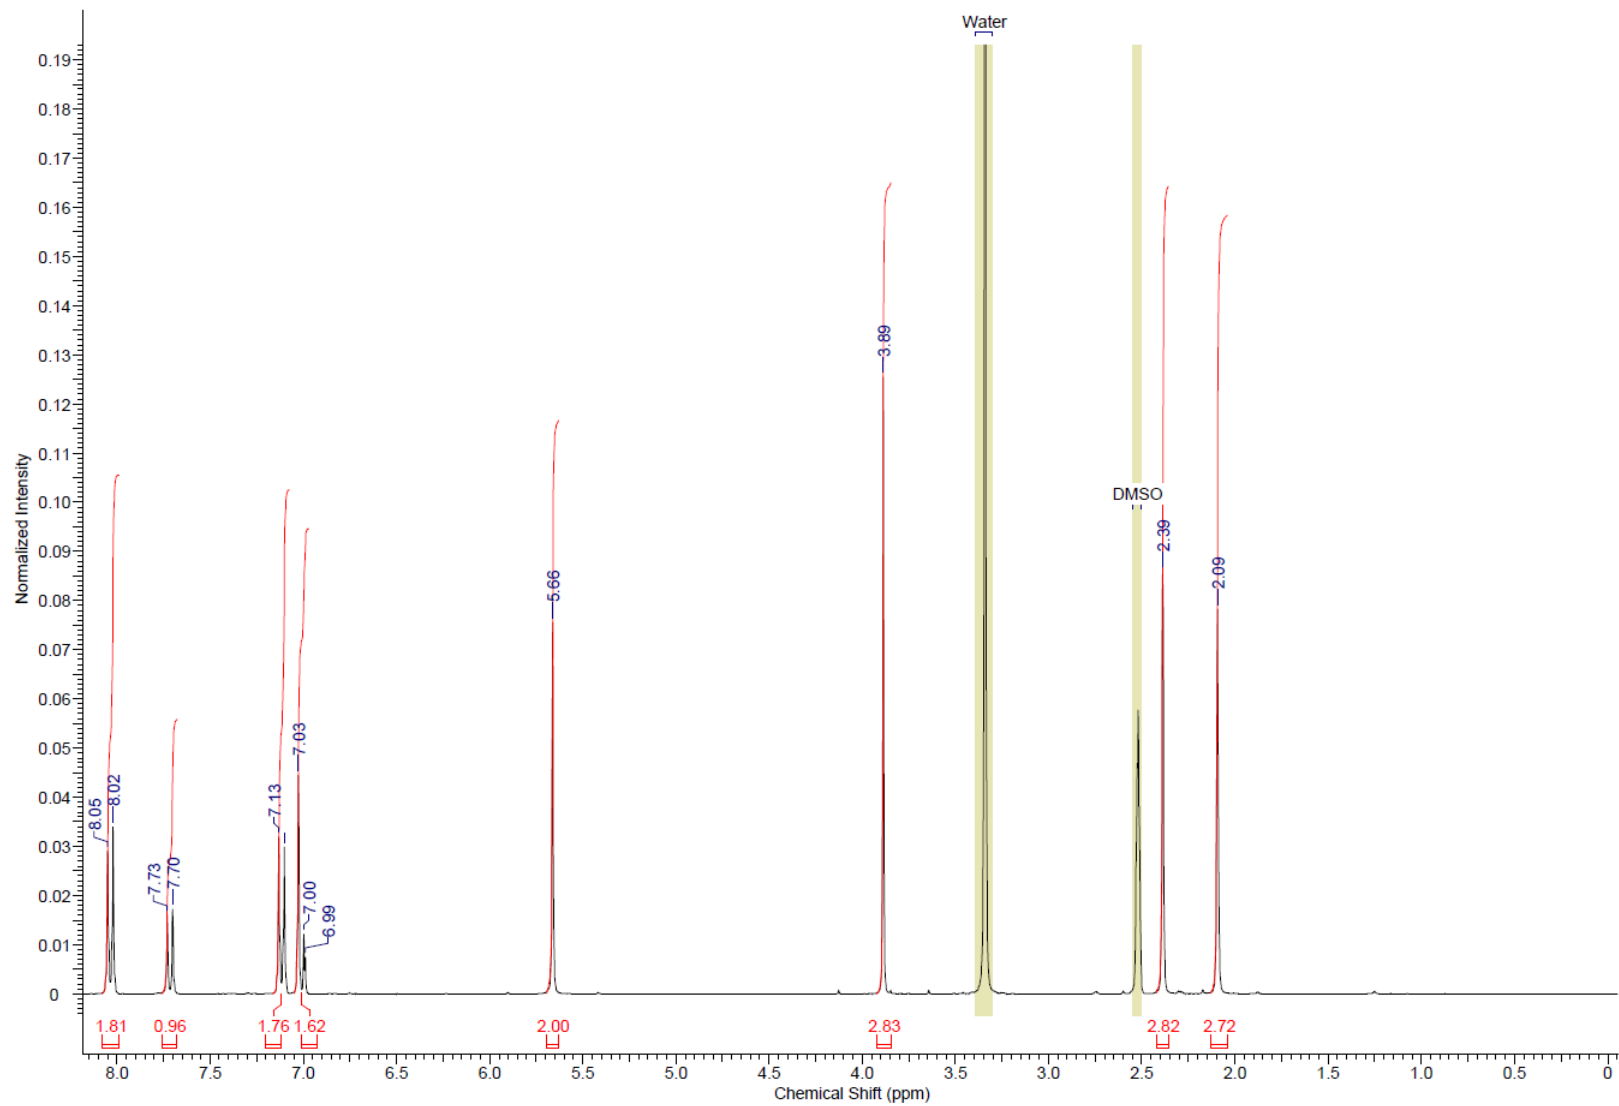

Supporting Information Figure 6:  $^1\text{H}$  NMR spectrum of AE168, 300 MHz, DMSO- $d_6$ .

4.1.4 3-(4-Methoxyphenyl)-5,6-dimethyl-furo[3,2-g]chromen-7-one (**Scaff10**)

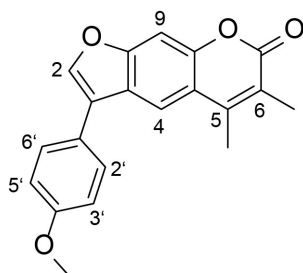

7-[2-(4-Methoxyphenyl)-2-oxo-ethoxy]-3,4-dimethyl-chromen-2-one (**AE168**) (250 mg, 0.74 mmol) was saponificated in 10 ml 1 M sodium hydroxide at 100 °C for 16 h. Dropwise addition of 1 M H<sub>2</sub>SO<sub>4</sub> resulted in precipitation of the product. The precipitated solid was washed with water and recrystallised in ethanol. The final product gave a white solid in 71 % yield (168 mg).

<sup>1</sup>H NMR (300 MHz, DMSO-d<sub>6</sub>): δ(ppm) = 2.12 - 2.20 (s, 3H, -C6-CH<sub>3</sub>), 2.48 - 2.53 (s, 3H, -C5-CH<sub>3</sub>), 3.81 - 3.89 (s, 3H, -OCH<sub>3</sub>), 7.09 - 7.16 (d, J = 9.16 Hz, 2H, H-3', -5'), 7.73 - 7.78 (m, 3H, H-9, -2', -6'), 8.11 - 8.14 (s, 1H, H-4), 8.36 - 8.38 (s, 1H, H-2)

ESI-MS: cal. 321.11, exp. 321.1 ([M+H]<sup>+</sup>)

HPLC: 99 % purity at 254 nm

t<sub>R</sub> (HPLC): 7.62 min; λ<sub>max</sub> = 251 nm and 305 nm

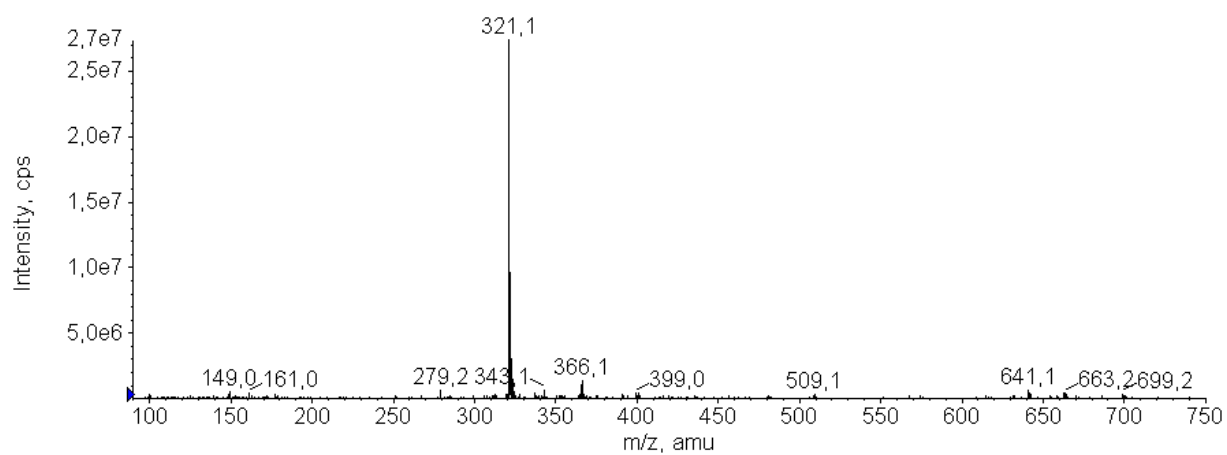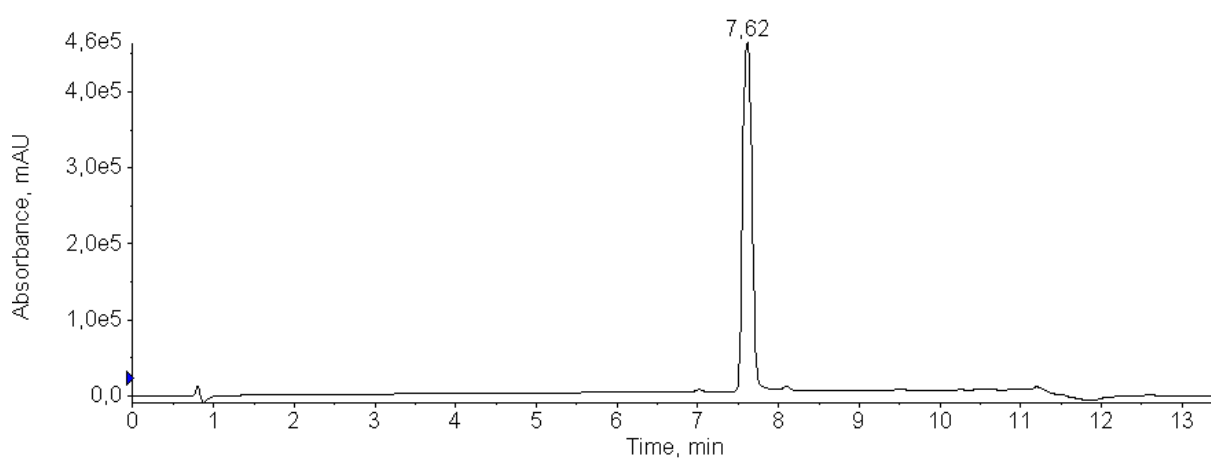

**Supporting Information Figure 7:** LC/MS analysis of **Scaff10**. Upper panel: Mass spectrum. Lower panel: according chromatogram.

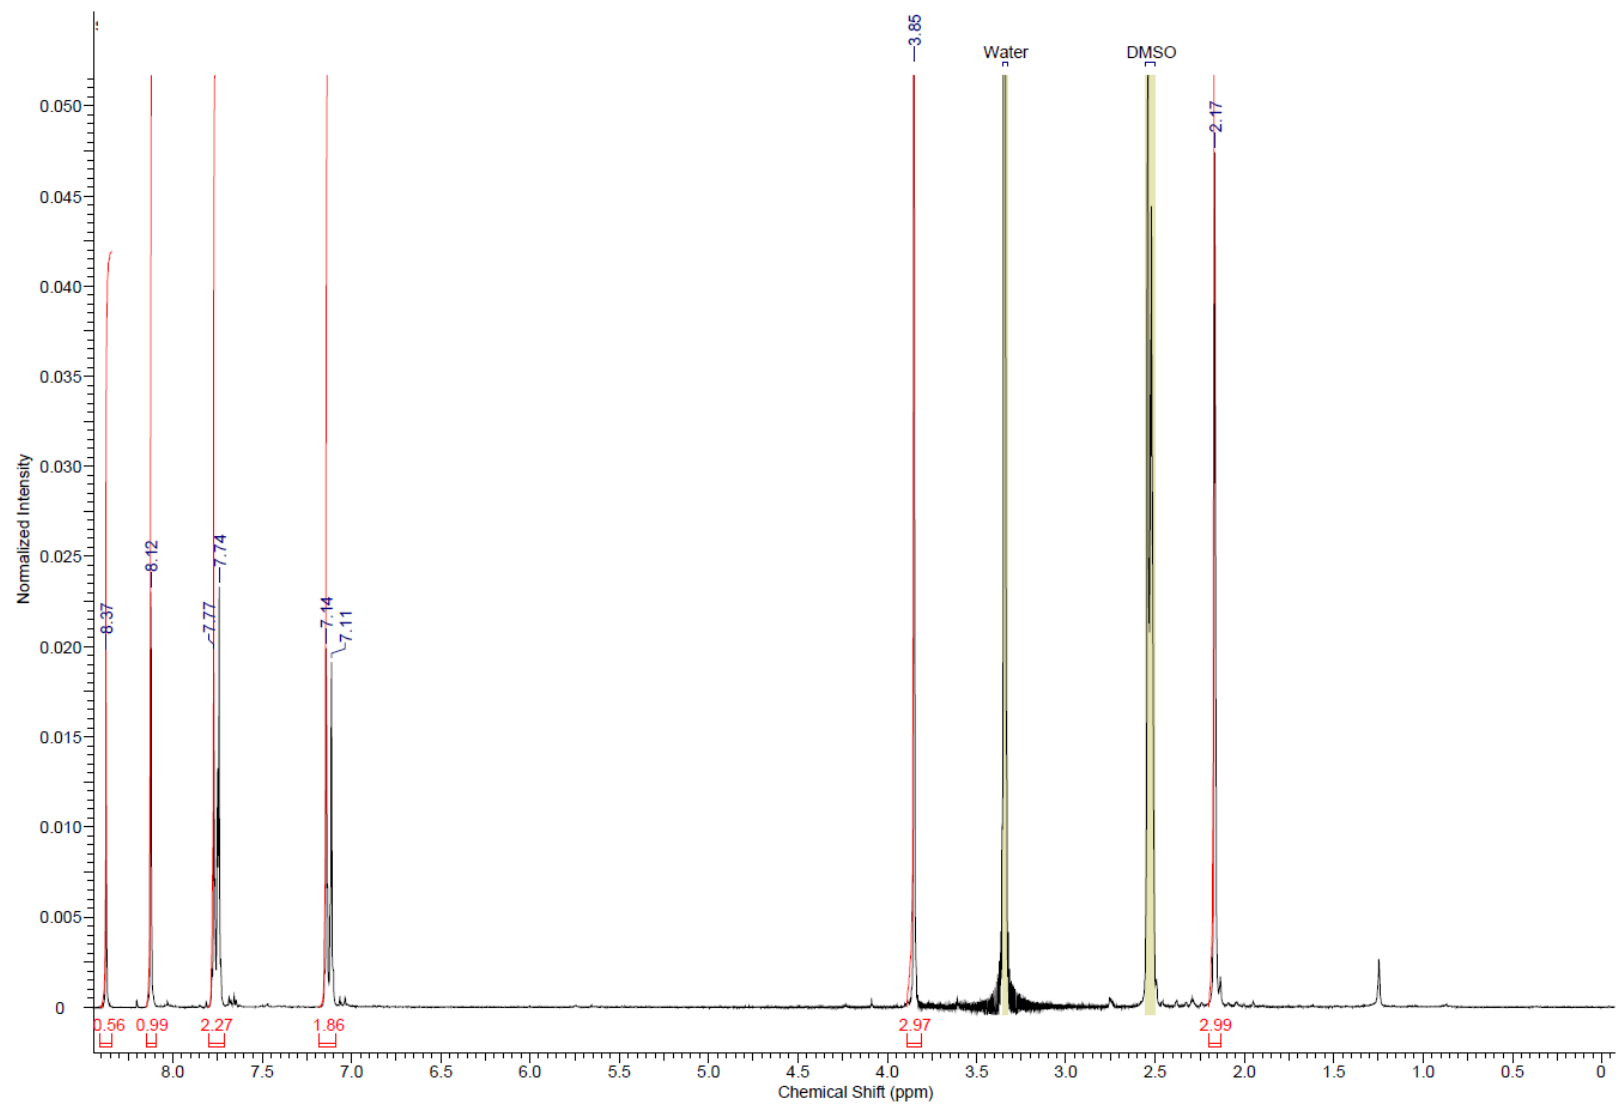

Supporting Information Figure 8: <sup>1</sup>H NMR spectrum of Scaff10, 300 MHz, DMSO-d<sub>6</sub>.

4.1.5 7-[2-(4-Methoxyphenyl)-2-oxo-ethoxy]chromen-2-one (**AE167**)

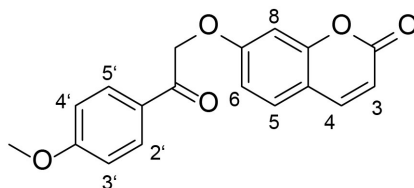

7-Hydroxychromen-2-one (**5c**) (1 g, 6.17 mmol) was solved in acetone and preactivated with potash in excess (2.142 g, 15.50 mmol) at 55 °C. The  $\alpha$ -haloketone 2-bromo-1-(4-methoxyphenyl)ethanone (**2b**) was added (1.554 g, 6.84 mmol). The mixture was refluxed at the same temperature for 4 h. Dropwise addition of 1 M H<sub>2</sub>SO<sub>4</sub> resulted in precipitation of the product. The precipitated solid was recrystallised in ethanol. The final product gave a white solid in 35 % yield (670 mg).

<sup>1</sup>H NMR (300 MHz, DMSO-d<sub>6</sub>):  $\delta$ (ppm) = 3.86 – 3.91 (s, 3H, -OCH<sub>3</sub>), 5.67 – 5.72 (s, 2H, -CO-CH<sub>2</sub>-OAr), 6.28 – 6.35 (d, J = 9.77 Hz, 1H, H-3), 6.99 – 7.16 (m, 4H, H-6, -8, -3', -4'), 6.63 – 6.69 (d, J = 8.54 Hz, 1H, H-5), 7.99 – 8.07 (m, 3H, H-4, 2', -5')

ESI-MS: cal. 311.09, exp. 310.9 ([M+H]<sup>+</sup>)

HPLC: 99 % purity at 254 nm

t<sub>R</sub> (HPLC): 5.60 min;  $\lambda_{\max}$  = 266 nm and 305 nm and 331 nm



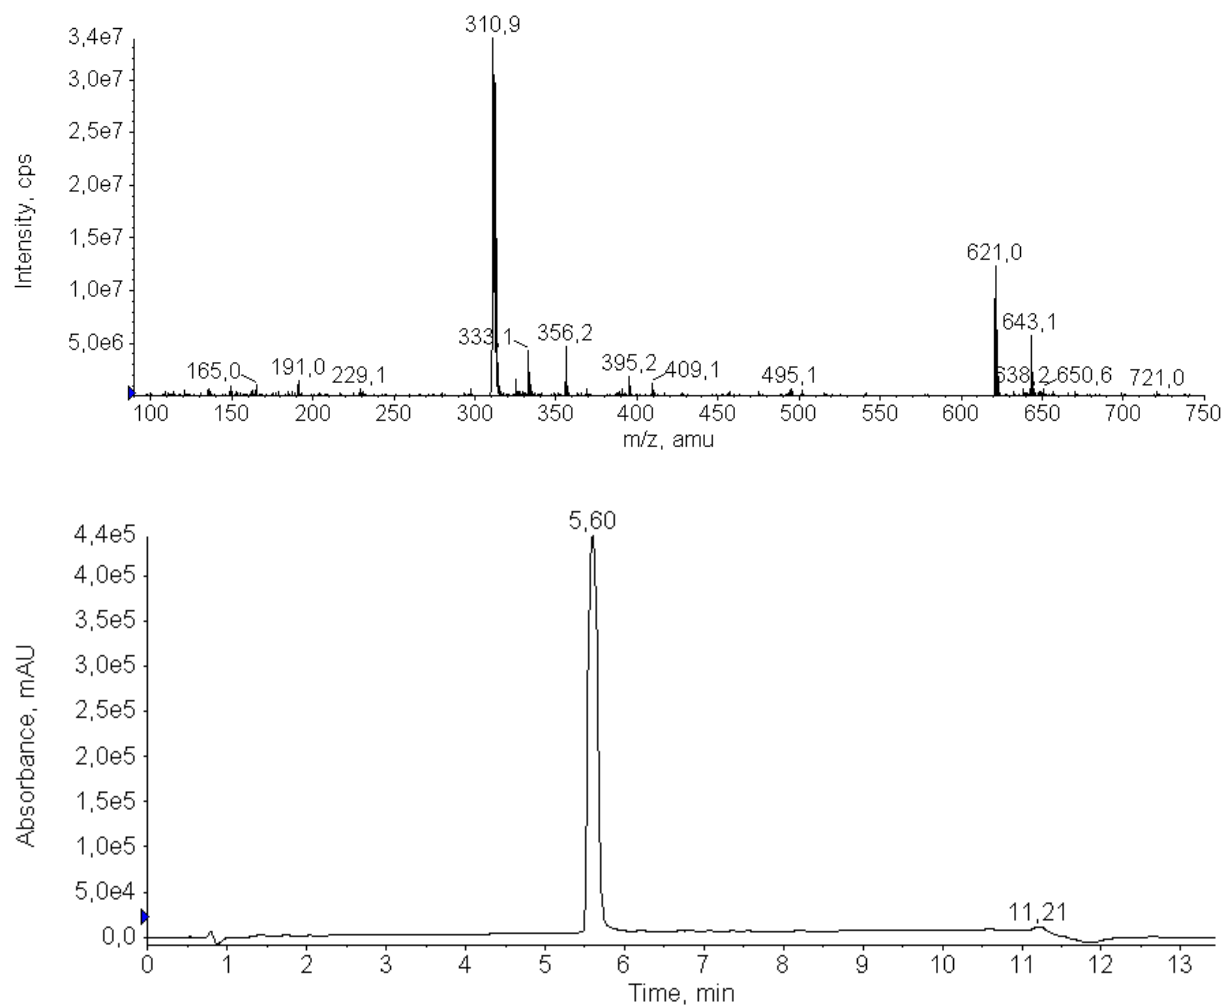

**Supporting Information Figure 9:** LC/MS analysis of **AE167**. Upper panel: Mass spectrum. Lower panel: according chromatogram.

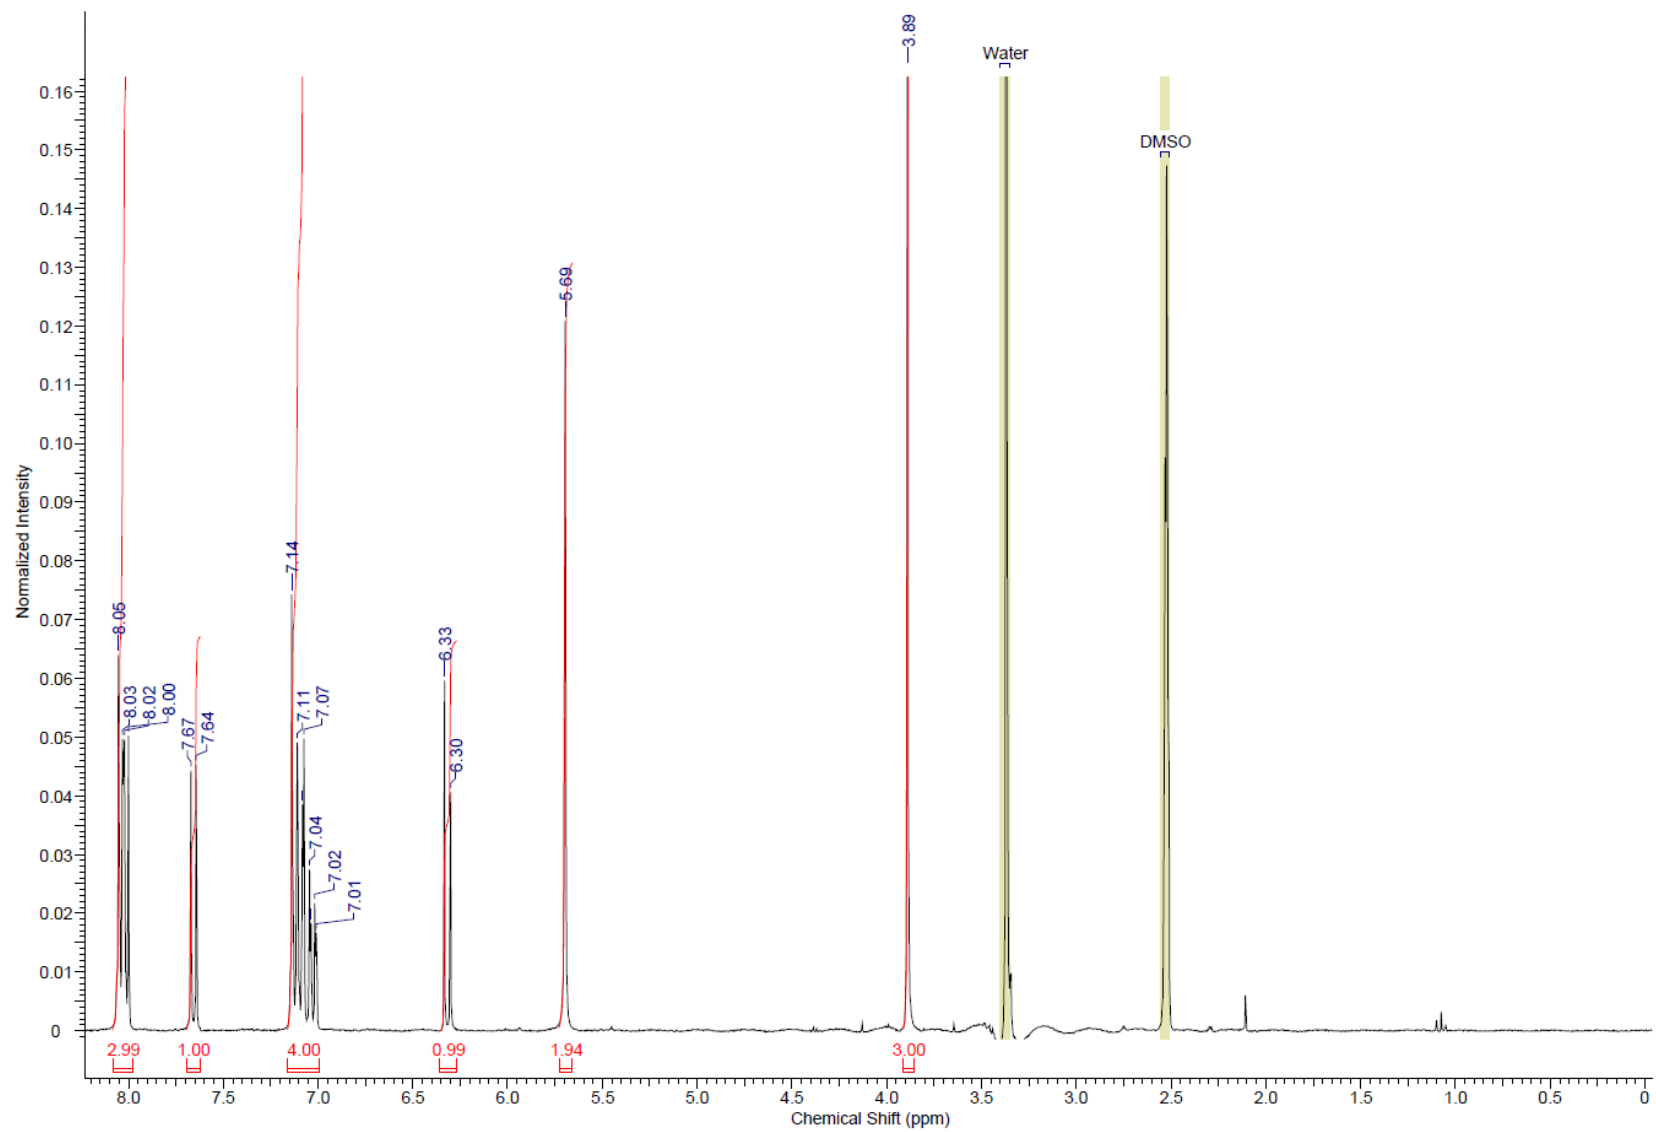

Supporting Information Figure 10: <sup>1</sup>H NMR spectrum of AE167, 300 MHz, DMSO-d<sub>6</sub>.

4.1.6 3-(4-Methoxyphenyl)furo[3,2-g]chromen-7-one (**Scaff10-1**)

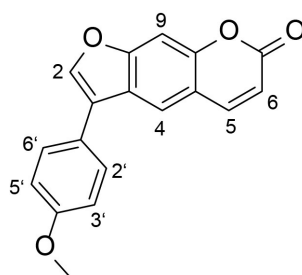

7-[2-(4-Methoxyphenyl)-2-oxo-ethoxy]chromen-2-one (**AE167**) (500 mg, 1.61 mmol) was saponificated in 10 ml 1 M sodium hydroxide at 100 °C for 3 h. Dropwise addition of 1 M H<sub>2</sub>SO<sub>4</sub> resulted in precipitation of the product. The precipitated solid was washed with water and recrystallised in ethanol. The final product gave a white solid in 23 % yield (108 mg).

<sup>1</sup>H NMR (300 MHz, DMSO-d<sub>6</sub>): δ(ppm) = 3.77 – 3.97 (s, 3H, -OCH<sub>3</sub>), 6.40 – 6.54 (d, J = 9.77 Hz, 1H, -C6-CH<sub>3</sub>), 7.02 – 7.21 (d, J = 7.93 Hz, 2H, H-3', -5'), 7.64 – 7.76 (d, J = 7.93 Hz, 2H, H-2', -6'), 7.76 - 7.82 (s, 1H, H-9), 8.17 – 8.28 (d, J = 9.77 Hz, 1H, -C5-CH<sub>3</sub>), 8.27 – 8.35 (s, 1H, H-4), 8.36 – 8.46 (s, 1H, H-2)

ESI-MS: cal. 293.04, exp. 293.0 ([M+H]<sup>+</sup>)

HPLC: 98 % purity at 254 nm

t<sub>R</sub> (HPLC): 6.75 min; λ<sub>max</sub> = 253 nm and 304 nm

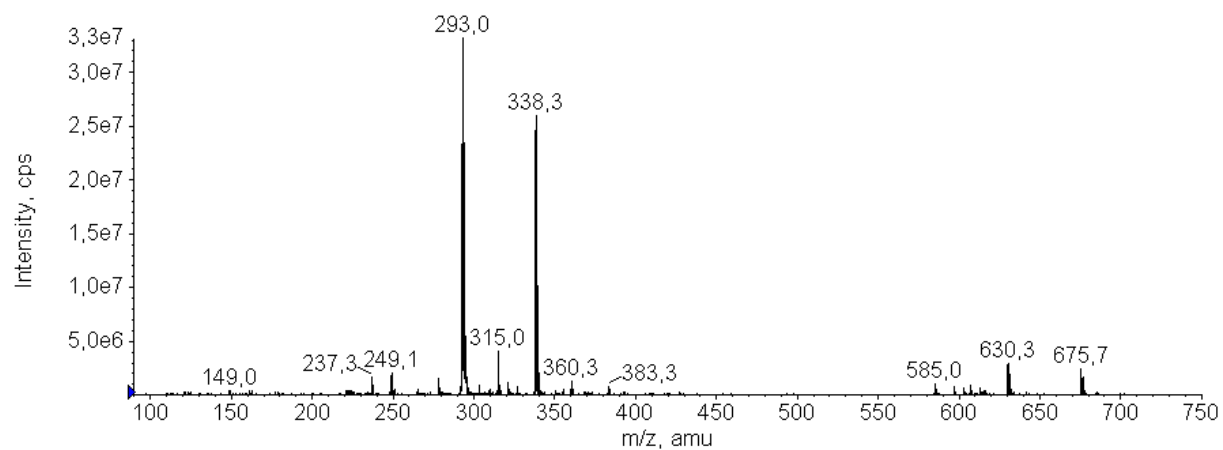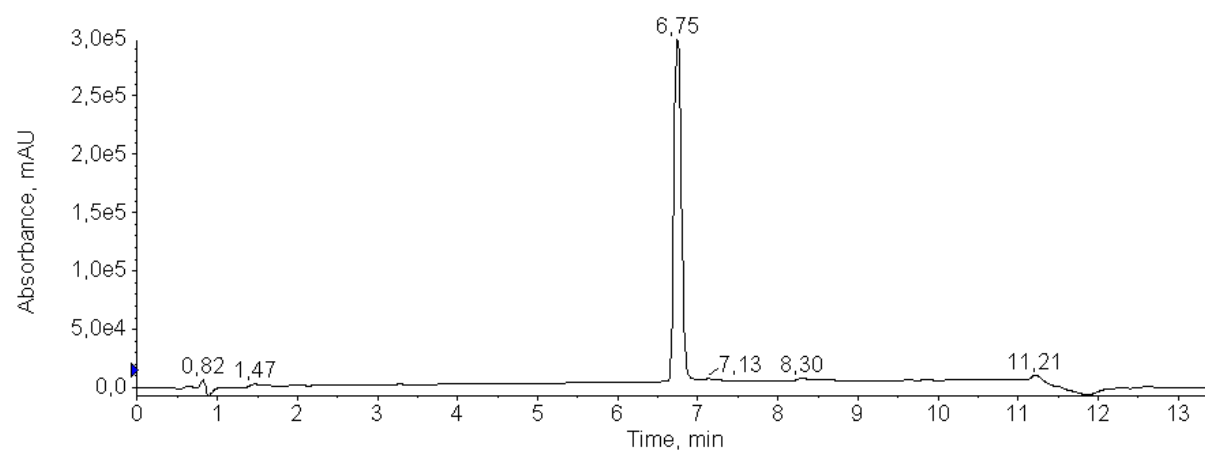

**Supporting Information Figure 11.:** LC/MS analysis of **Scaff10-1**. Upper panel: Mass spectrum. Lower panel: according chromatogram.

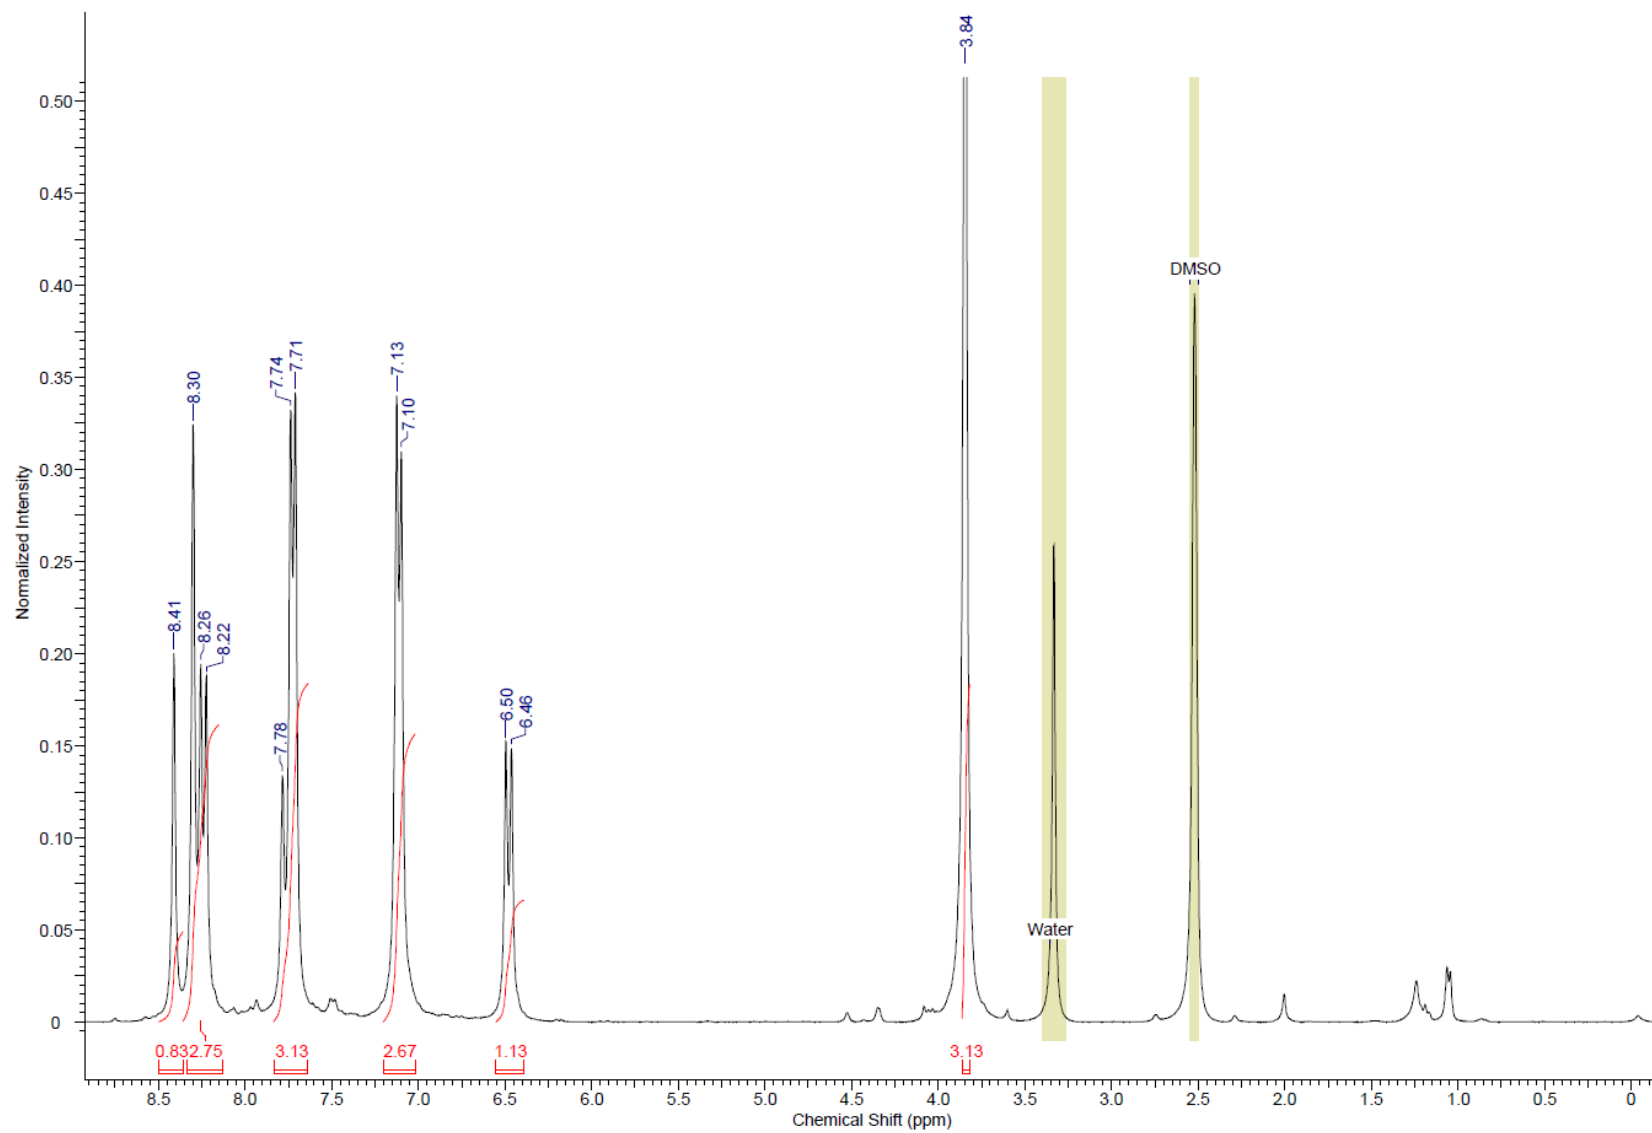

Supporting Information Figure 12:  $^1\text{H}$  NMR spectrum of Scaff10-1, 300 MHz,  $\text{DMSO-d}_6$ .

4.1.7 3,4-Dimethyl-7-[2-oxo-2-(3-pyridyl)ethoxy]chromen-2-one (**Scaff10-2**)

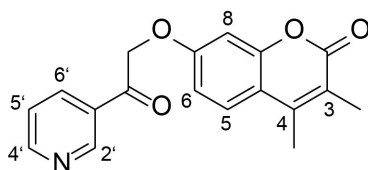

7-Hydroxy-3,4-dimethyl-chromen-2-one (**5b**) (200 mg, 1.05 mmol) was solved in acetone and preactivated with potash in excess (363 mg, 2.63 mmol) at 55 °C. The  $\alpha$ -haloketone 2-bromo-1-(3-pyridyl)ethanone (**2c**) was added (323 mg, 1.61 mmol). The mixture was refluxed at the same temperature. The final product after purification gave an orange solid in 14 % yield (46 mg).

$^1\text{H}$  NMR (300 MHz, DMSO- $d_6$ ):  $\delta$ (ppm) = 1.94 – 2.11 (s, 3H, -C3-CH<sub>3</sub>), 2.26 – 2.40 (s, 3H, -C4-CH<sub>3</sub>), 5.69 – 5.84 (s, 2H, -CO-CH<sub>2</sub>-OAr), 6.99 – 7.07 (d, J = 9.77 Hz, 1H, H-6), 7.07 – 7.12 (d, 1H, H-8), 7.60 – 7.74 (m, 2H, H-5, -5'), 8.34 – 8.42 (d, J = 7.33 Hz, 2H, H-6'), 8.82 – 8.89 (d, J = 3.66 Hz, 1H, H-4'), 9.18 9.24 (s, 1H, H-2')

ESI-MS: cal. 310.10, exp. 310.1 ([M+H]<sup>+</sup>)

HPLC: 98 % purity at 254 nm

$t_R$  (HPLC): 4.90 min;  $\lambda_{\text{max}}$  = 278 nm and 317 nm

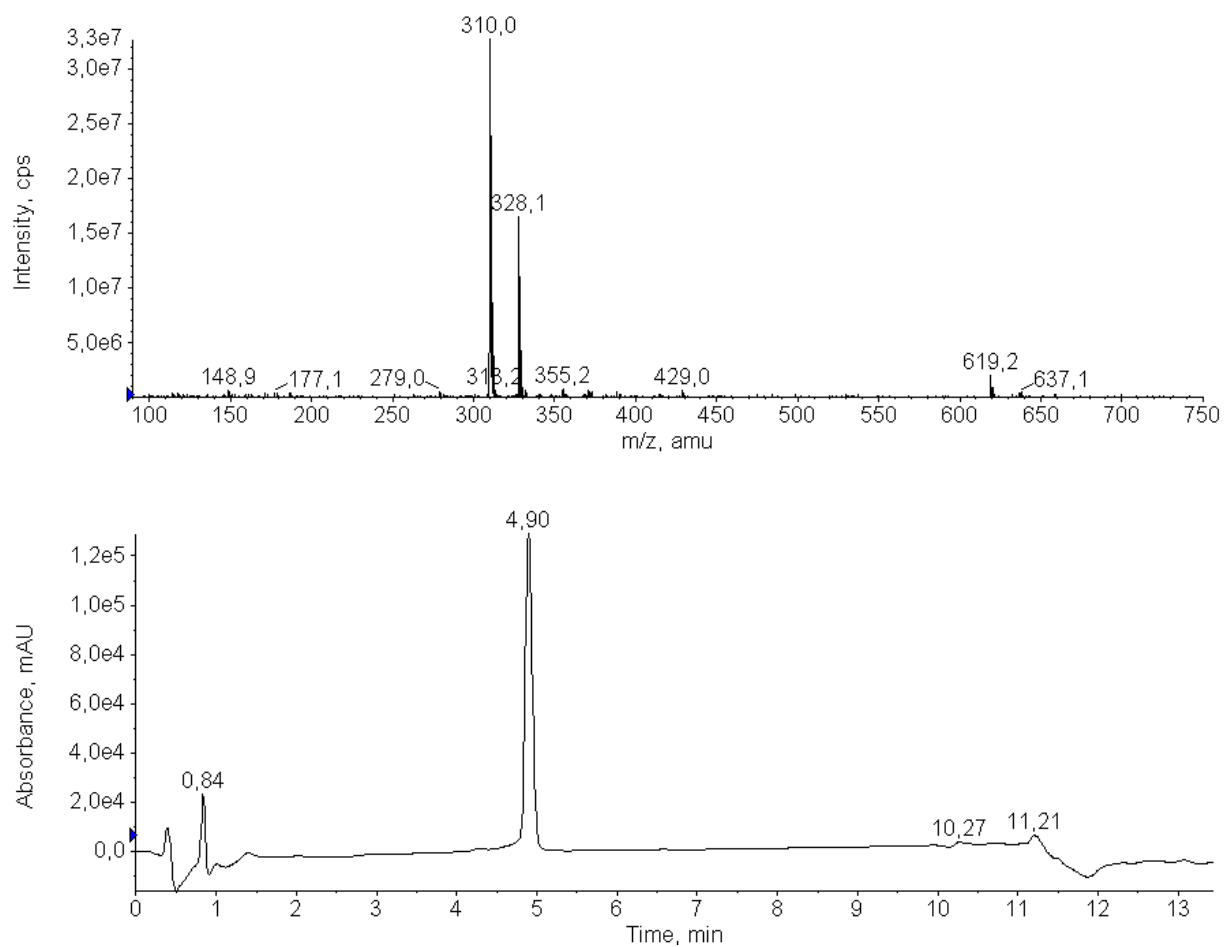

**Supporting Information Figure 13:** LC/MS analysis of **Scaff10-2**. Upper panel: Mass spectrum. Lower panel: according chromatogram.

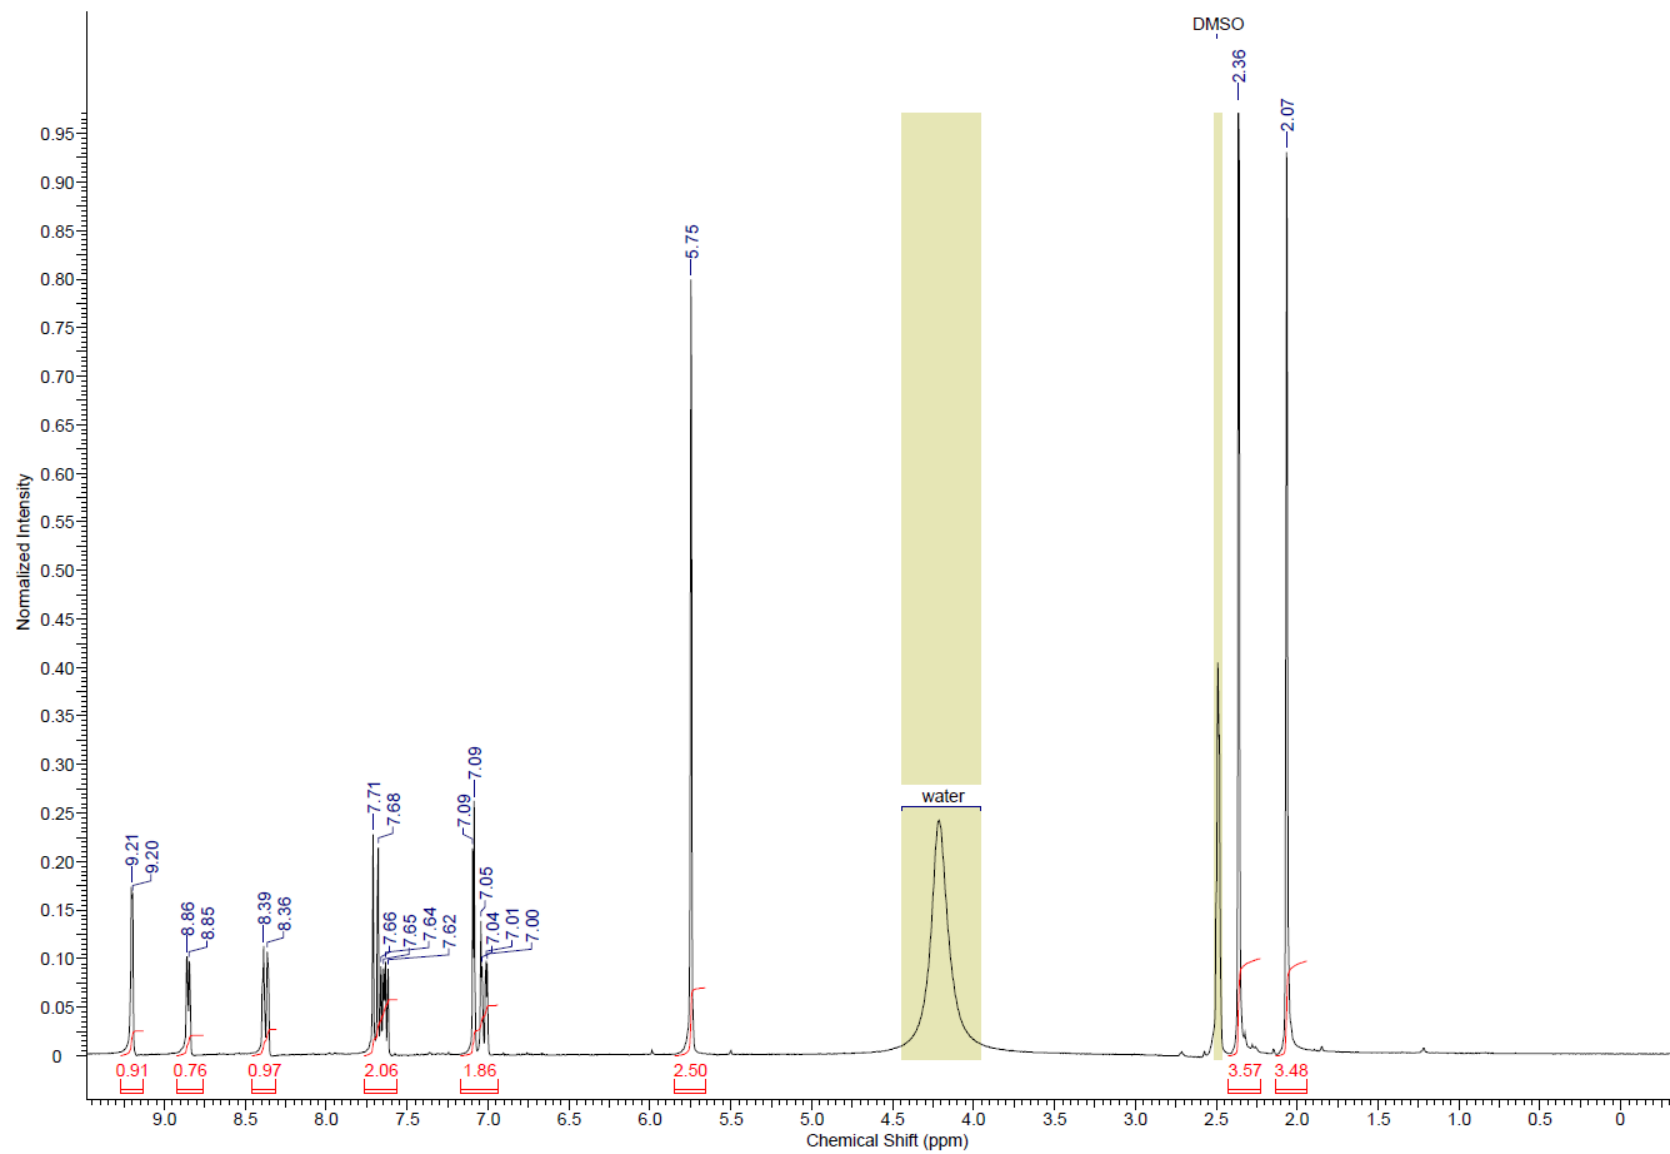

Supporting Information Figure 14: <sup>1</sup>H NMR spectrum of Scaff10-2, 300 MHz, DMSO-d<sub>6</sub>.



4.1.8 5,6-Dimethyl-3-(3-pyridyl)furo[3,2-g]chromen-7-one (**Scaff10-3**)

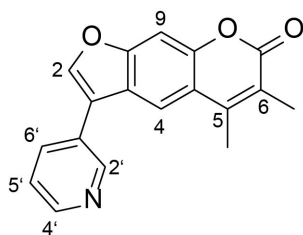

3,4-Dimethyl-7-[2-oxo-2-(3-pyridyl)ethoxy]chromen-2-one (**Scaff10-2**) (200 mg, 0.65 mmol) was saponificated in 1 M sodium hydroxide at 100 °C for 5 h. Dropwise addition of 1 M H<sub>2</sub>SO<sub>4</sub> resulted in precipitation of the product. The precipitated solid was purified using preparative HPLC. The final product gave a yellowish solid.

<sup>1</sup>H NMR (300 MHz, DMSO-d<sub>6</sub>): δ(ppm) = 2.12 - 2.21 (s, 3H, -C6-CH<sub>3</sub>), 2.55 - 2.62 (s, 3H, -C5-CH<sub>3</sub>), 7.59 - 7.66 (m, 1H, H-5'), 7.81 - 7.85 (s, 1H, H-9), 8.19 - 8.24 (s, 1H, H-4), 8.28 - 8.35 (d, J = 8.54 Hz, 1H, H-6'), 8.61 - 8.65 (s, 1H, H-2), 8.65 - 8.72 (d, J = 3.66 Hz, 1H, H-4'), 9.05 - 9.12 (s, 1H, H-2')

ESI-MS: cal. 292.09, exp. 292.1 ([M+H]<sup>+</sup>)

HPLC: 98 % purity at 254 nm

t<sub>R</sub> (HPLC): 4.55 min; λ<sub>max</sub> = 297 nm and 323 nm

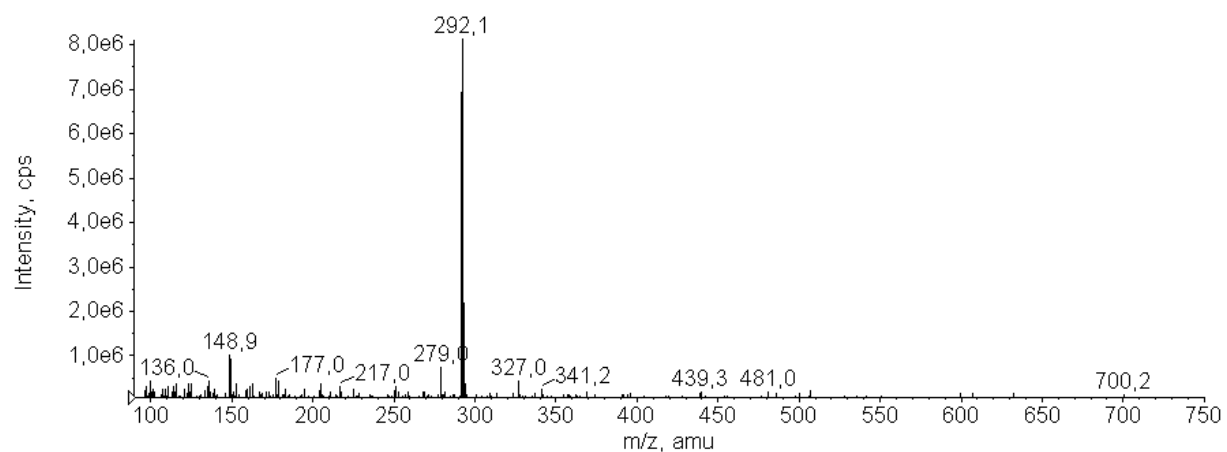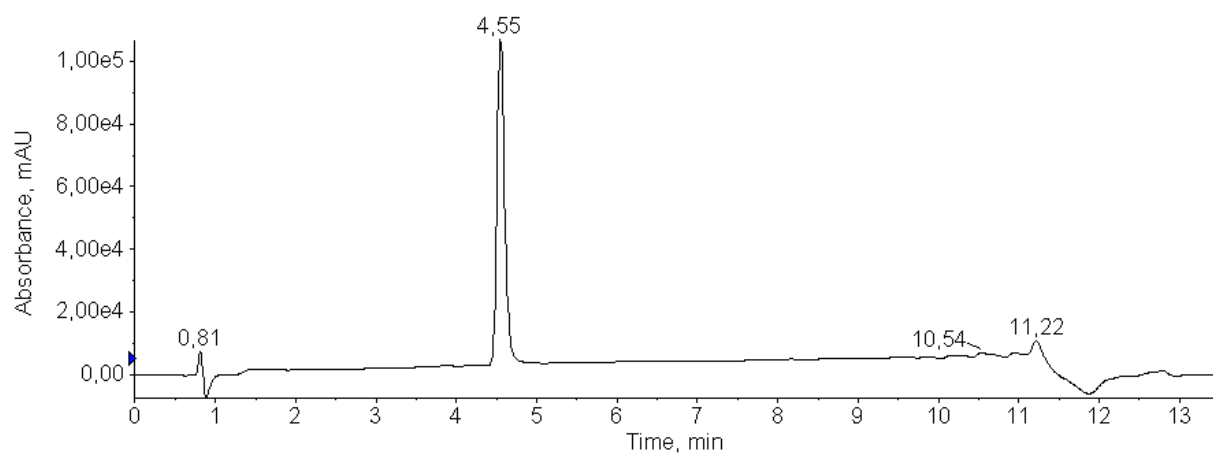

**Supporting Information Figure 15:** LC/MS analysis of **Scaff10-3**. Upper panel: Mass spectrum. Lower panel: according chromatogram.

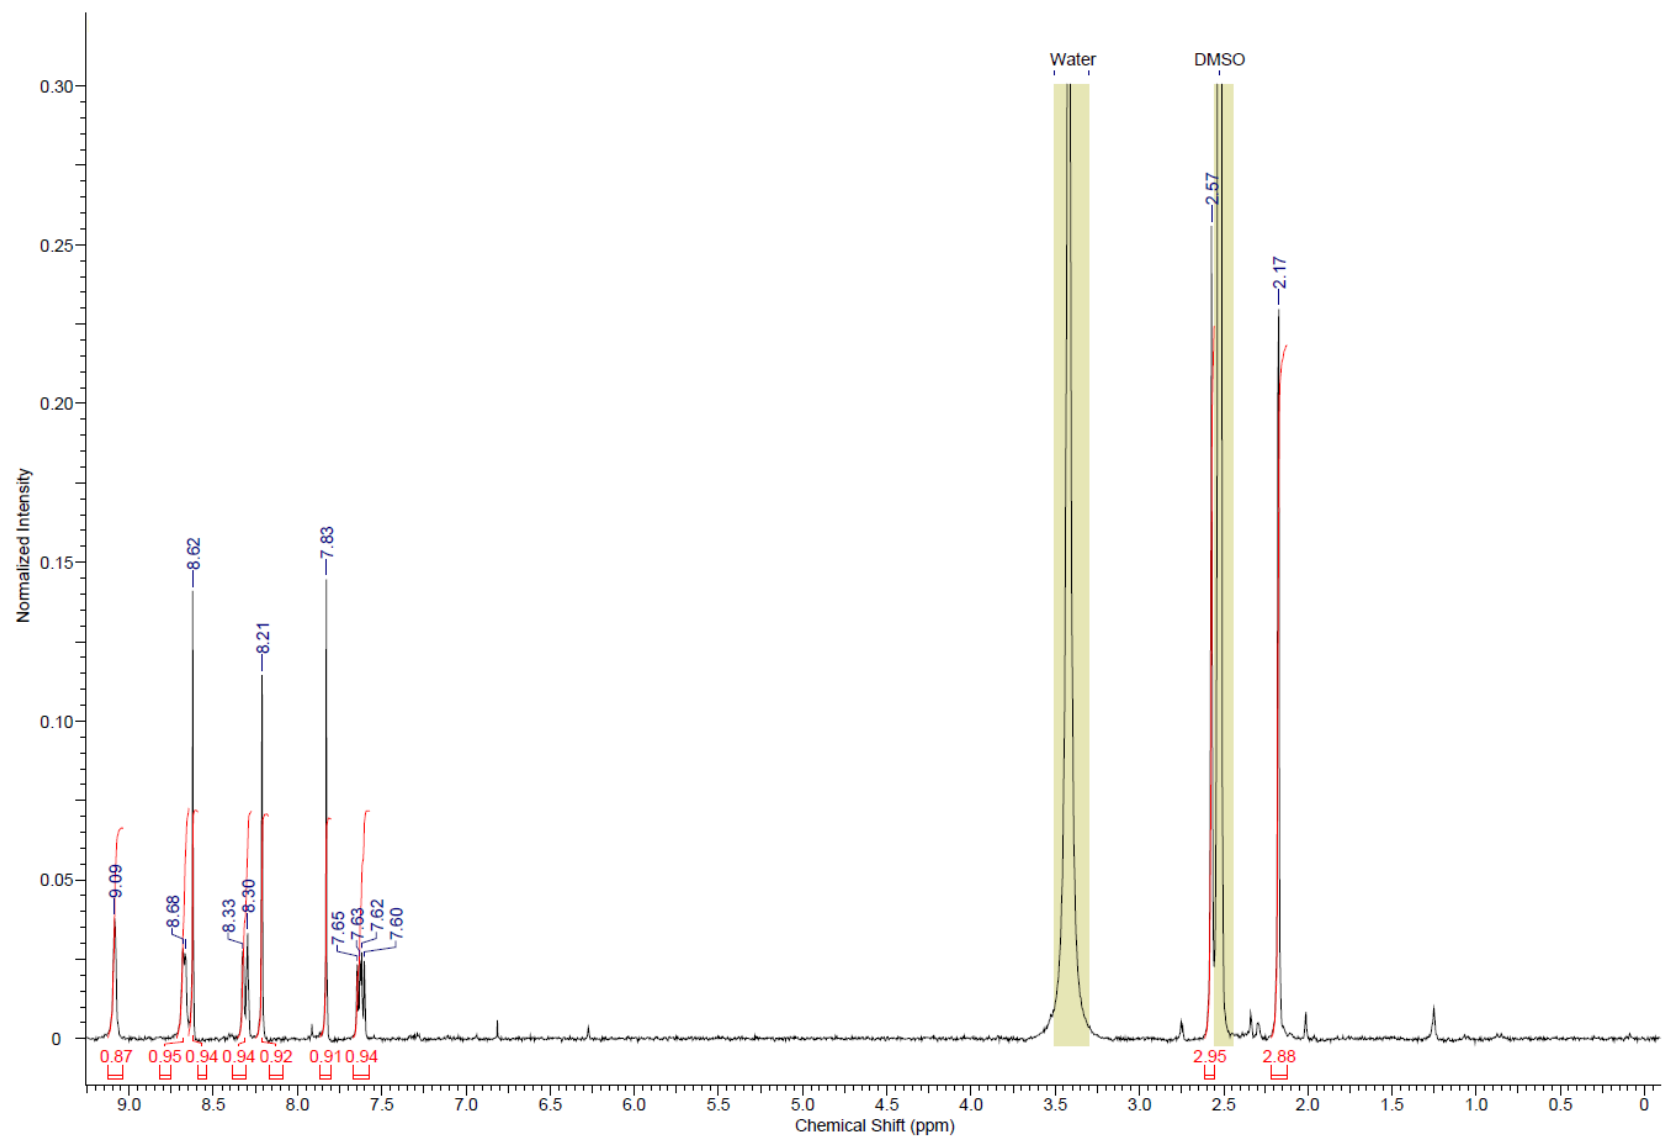

Supporting Information Figure 16:  $^1\text{H}$  NMR spectrum of Scaff10-3, 300 MHz,  $\text{DMSO-d}_6$ .

4.1.9 7-[2-[6-(4-Fluorophenyl)-2-methyl-3-pyridyl]-2-oxo-ethoxy]-3,4-dimethyl-chromen-2-one (**Scaff10-4**)

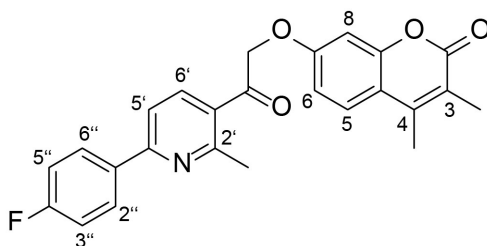

7-Hydroxy-3,4-dimethyl-chromen-2-one (**5b**) (200 mg, 1.05 mmol) was solved in acetone and preactivated with potash in excess (363 mg, 2.63 mmol) by 55 °C. The  $\alpha$ -haloketone 2-bromo-1-(6-(4-fluorophenyl)-2-methylpyridin-3-yl)ethanone (**2d**) was added (355 mg, 1.15 mmol). The mixture was refluxed at the same temperature. The final product after purification gave a white solid.

$^1\text{H}$  NMR (300 MHz, DMSO- $d_6$ ):  $\delta$ (ppm) = 2.05 – 2.15 (s, 3H, -C3-CH $_3$ ), 2.37 – 2.44 (s, 3H, -C4-CH $_3$ ), 2.69 – 2.76 (s, 3H, -OCH $_3$ ), 5.63 – 5.69 (s, 2H, -CO-CH $_2$ -OAr), 7.01 – 7.11 (m, 2H, H-6, -8), 7.34 – 7.44 (t, J = 8.54 Hz, 2H, H-3'', -5''), 7.71 – 7.76 (d, J = 9.77 Hz, 1H, H-5), 8.02 – 8.08 (d, J = 8.54 Hz, 1H, H-5'), 8.25 – 8.33 (dd, J = 4.88 Hz, 8.55 Hz, 2H, H-2'', -6''),

ESI-MS: cal. 418.14, exp. 418.1 ([M+H] $^+$ )

HPLC: 98 % purity at 254 nm

$t_R$  (HPLC): 7.51 min;  $\lambda_{\text{max}}$  = 267 nm and 310 nm

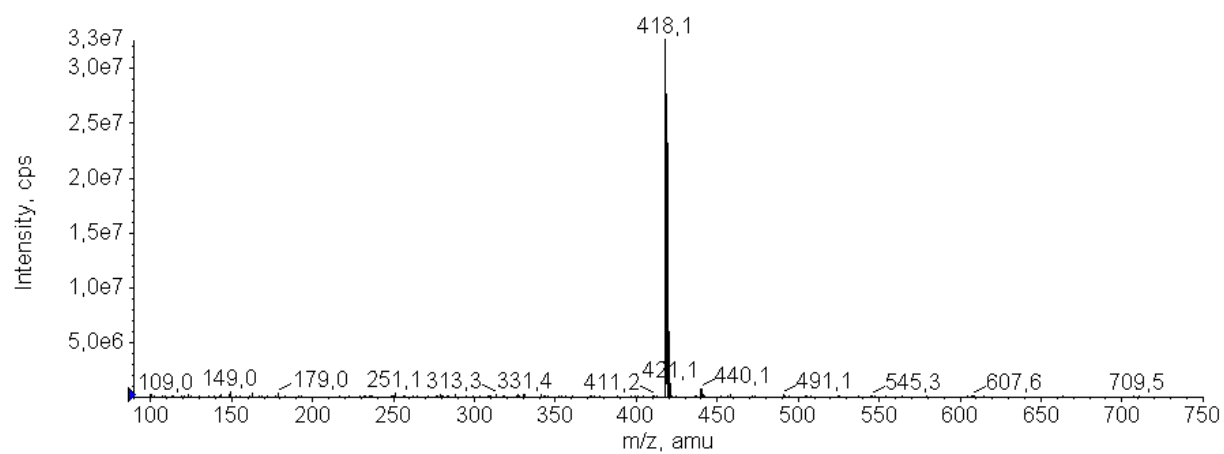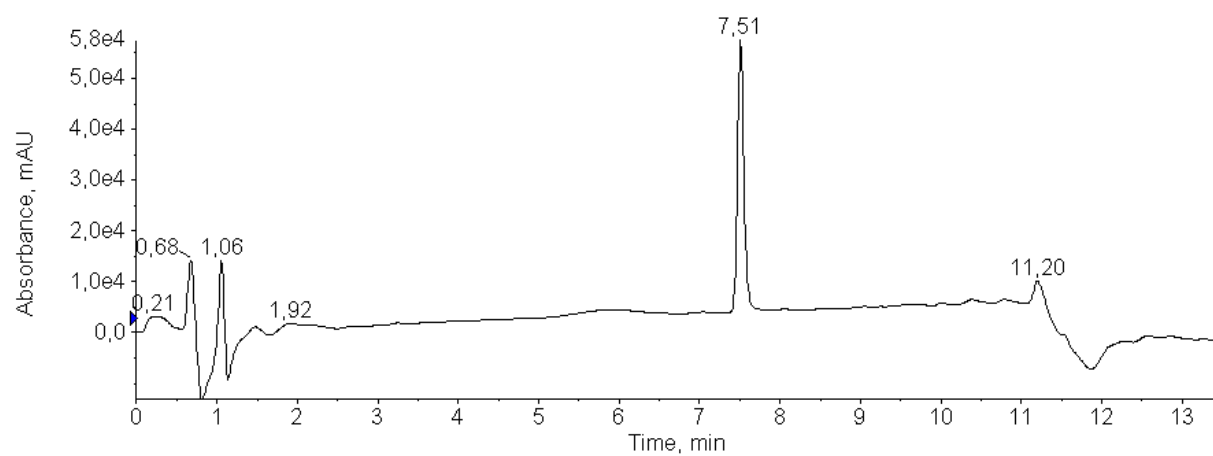

**Supporting Information Figure 17:** LC/MS analysis of **Scaff10-4**. Upper panel: Mass spectrum. Lower panel: according chromatogram.

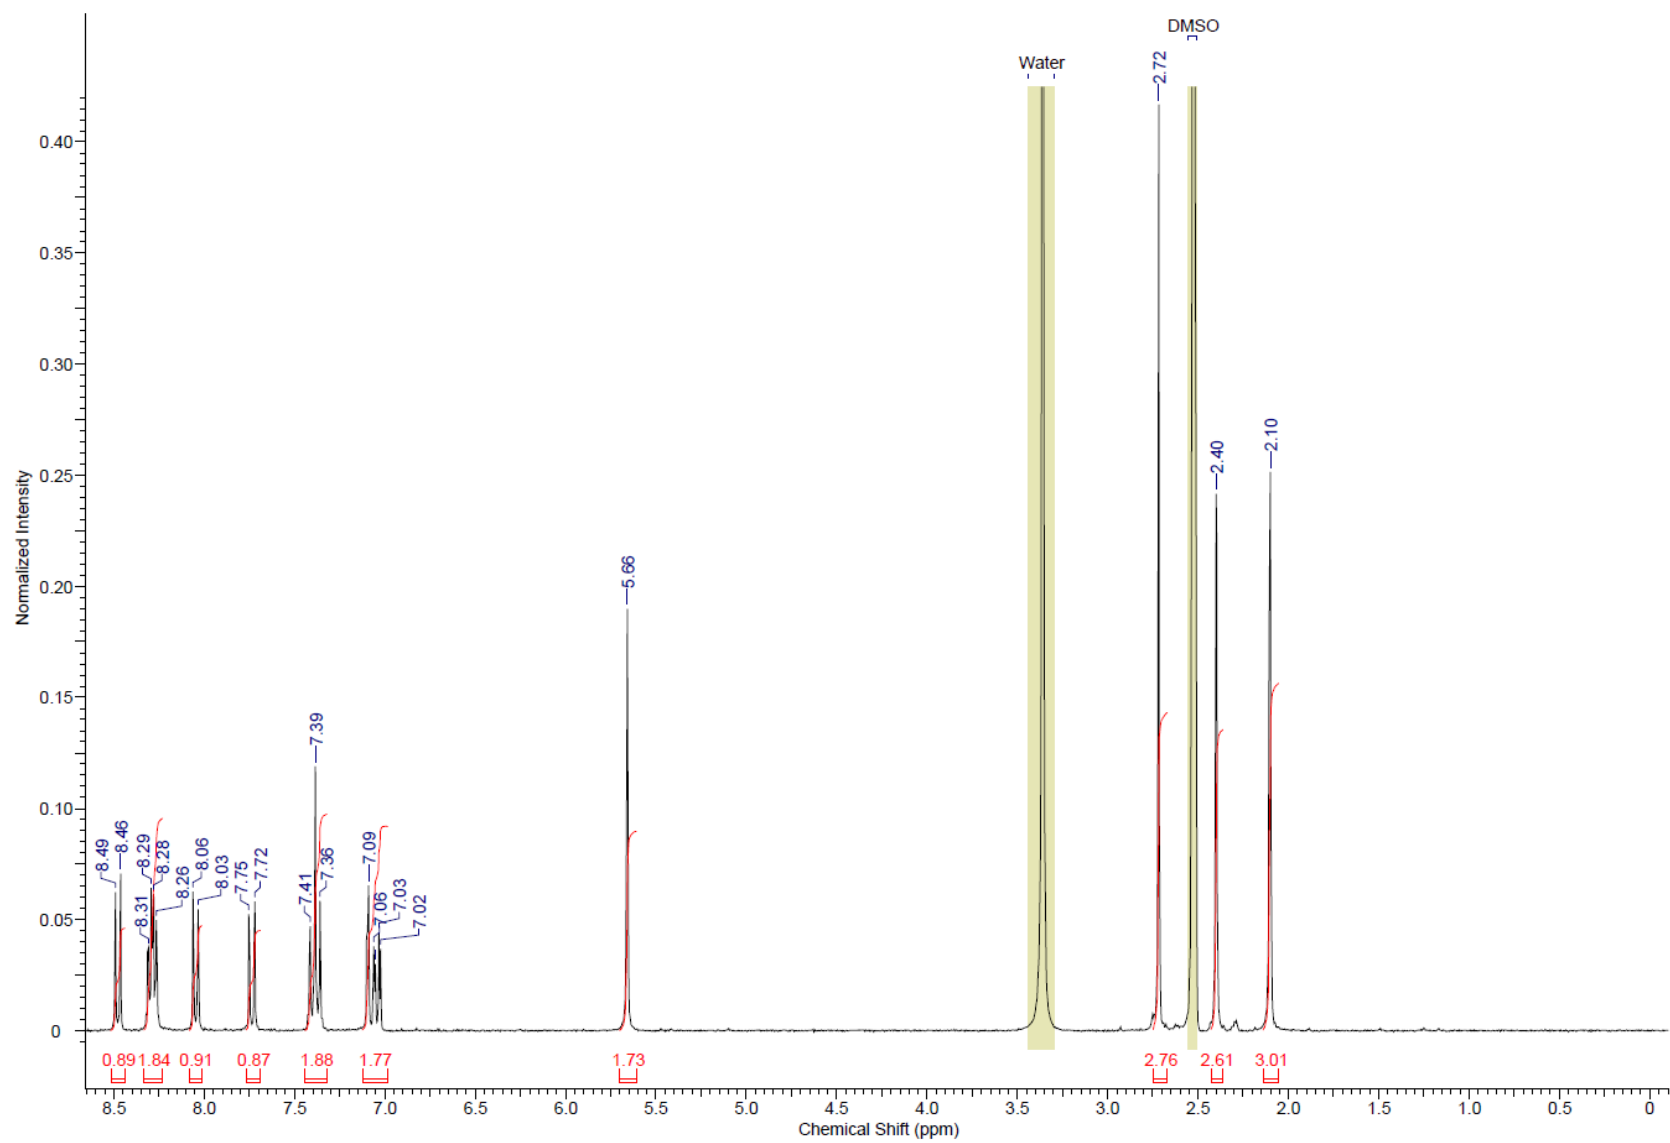

**Supporting Information Figure 18:**  $^1\text{H}$  NMR spectrum of **Scaff10-4**, 300 MHz,  $\text{DMSO-d}_6$ .

4.1.10 3-[6-(4-Fluorophenyl)-2-methyl-3-pyridyl]-5,6-dimethyl-furo[3,2-g]chromen-7-one (**Scaff10-5**)

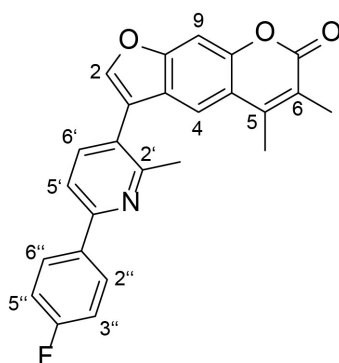

7-[2-[6-(4-Fluorophenyl)-2-methyl-3-pyridyl]-2-oxo-ethoxy]-3,4-dimethyl-chromen-2-one (**Scaff10-4**) (200 mg, 0.48 mmol) was saponificated in 5 ml 1 M sodium hydroxide at 115 °C for 5 h. Dropwise addition of 1 M H<sub>2</sub>SO<sub>4</sub> resulted in precipitation of the product. After addition of 10 ml ACN, the precipitated solid was filtered. The final product gave a white solid in 71 % yield (136 mg).

<sup>1</sup>H NMR (300 MHz, DMSO-d<sub>6</sub>): δ(ppm) = 2.10 – 2.16 (s, 3H, -C6-CH<sub>3</sub>), 2.40 – 2.48 (s, 3H, -C2'-CH<sub>3</sub>), 2.54 – 2.62 (s, 3H, -C5-CH<sub>3</sub>), 7.30 – 7.39 (m, 2H, H-5', -6'), 7.79 - 7.87 (d, J = 13.43 Hz, 2H, H-3'', -5''), 7.93 – 7.97 (m, 2H, H-4, -9), 8.18 – 8.26 (m, 2H, H-2'', -6''), 8.34 – 8.37 (s, 1H, H-2)

ESI-MS: cal. 400.13, exp. 400.1 ([M+H]<sup>+</sup>)

HPLC: 96 % purity at 254 nm

t<sub>R</sub> (HPLC): 8.11 min; λ<sub>max</sub> = 245 nm and 299 nm

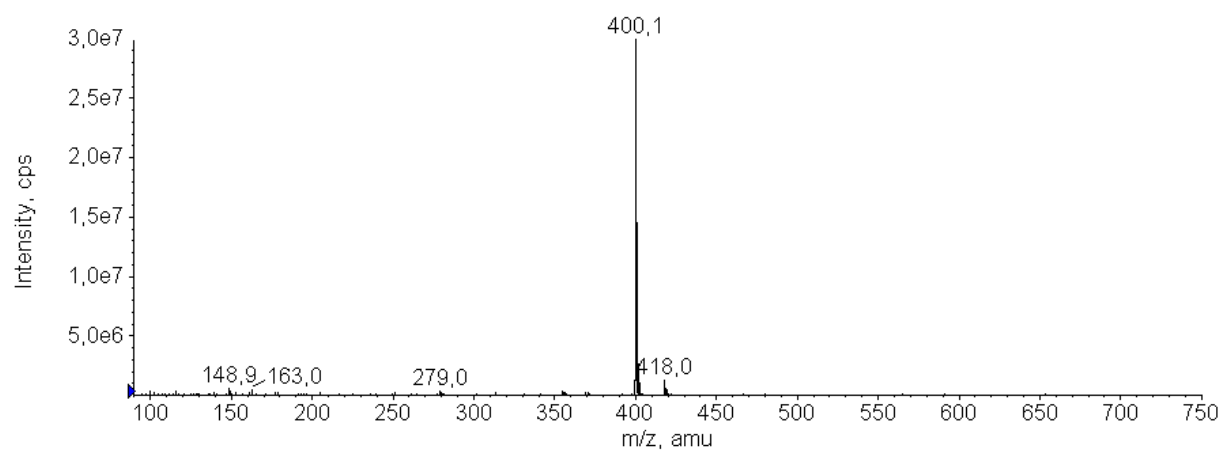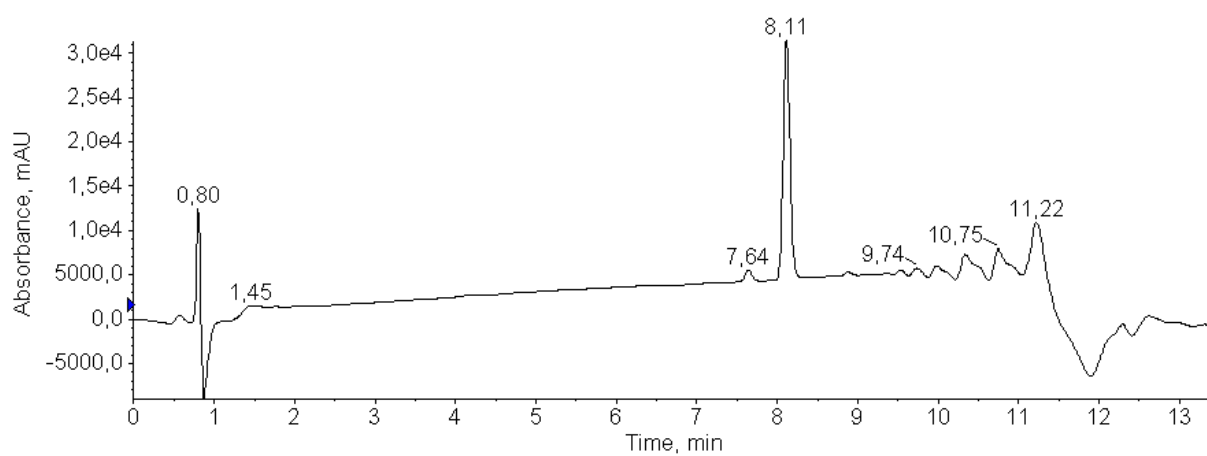

**Supporting Information Figure 19:** LC/MS analysis of **Scaff10-5**. Upper panel: Mass spectrum. Lower panel: according chromatogram.



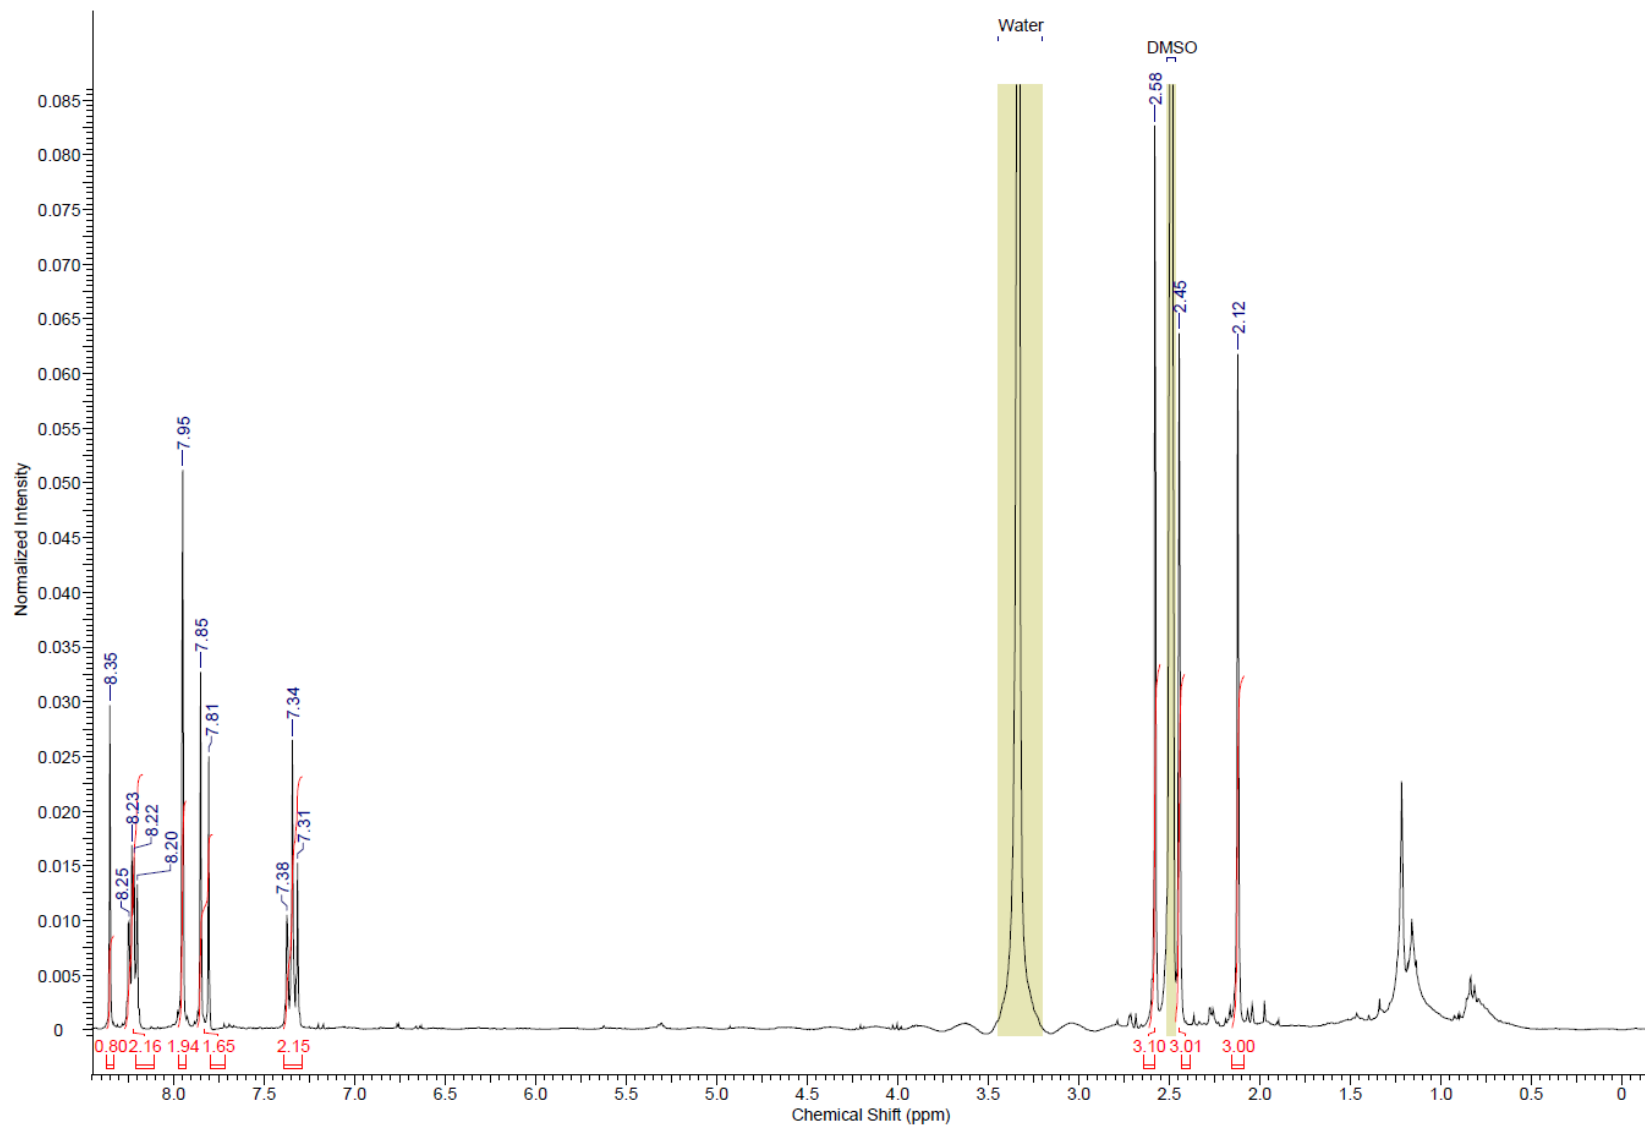

Supporting Information Figure 20:  $^1\text{H}$  NMR spectrum of Scaff10-5, 300 MHz,  $\text{DMSO-d}_6$ .

4.1.11 3-[7-[2-(4-Methoxyphenyl)-2-oxo-ethoxy]-4-methyl-2-oxo-chromen-3-yl]propanoic acid (**Scaff10-6**)

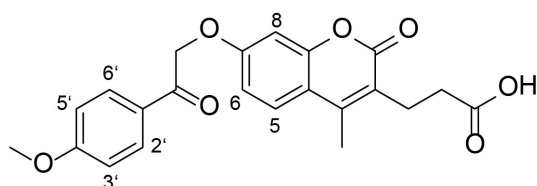

Ethyl 3-[7-[2-(4-methoxyphenyl)-2-oxo-ethoxy]-4-methyl-2-oxo-chromen-3-yl]propanoate (**Scaff10-7**) (100 mg, 0.24 mmol) was saponificated in a mixture of 6 ml dry acetone and 6 ml 1 M sodium hydroxide at 55 °C for 16 h. Dropwise addition of 1 M HCl resulted in precipitation of the product. The precipitated solid was purified using preparative HPLC. The product was obtained after lyophilisation a yellowish solid.

$^1\text{H}$  NMR (300 MHz, DMSO- $d_6$ ):  $\delta$ (ppm) = 1.91 – 2.01 (t,  $J$  = 8.54 Hz, 2H,  $-\text{CH}_2-\text{CH}_2-\text{COOH}$ ), 2.37 – 2.45 (s, 3H, Ar- $\text{CH}_3$ ), 2.63 – 2.73 (t,  $J$  = 8.54 Hz, 2H,  $-\text{CH}_2-\text{CH}_2-\text{COOH}$ ), 3.86 – 3.91 (s, 3H,  $-\text{OCH}_3$ ), 5.64 – 5.69 (s, 2H,  $-\text{CO}-\text{CH}_2-\text{OAr}$ ), 6.97 – 7.03 (m, 2H, H-6, -8), 7.09 – 7.15 (d,  $J$  = 8.55 Hz, 2H, H-3', -5'), 7.66 – 7.71 (d,  $J$  = 8.54 Hz, 1H, H-5), 8.02 – 8.07 (d,  $J$  = 8.54 Hz, 2H, H-2', -6')

ESI-MS: cal. 397.12, exp. 397.1 ( $[\text{M}+\text{H}]^+$ )

HPLC: 95 % purity at 254 nm

$t_R$  (HPLC): 5.38 min;  $\lambda_{\text{max}}$  = 284 nm and 317 nm

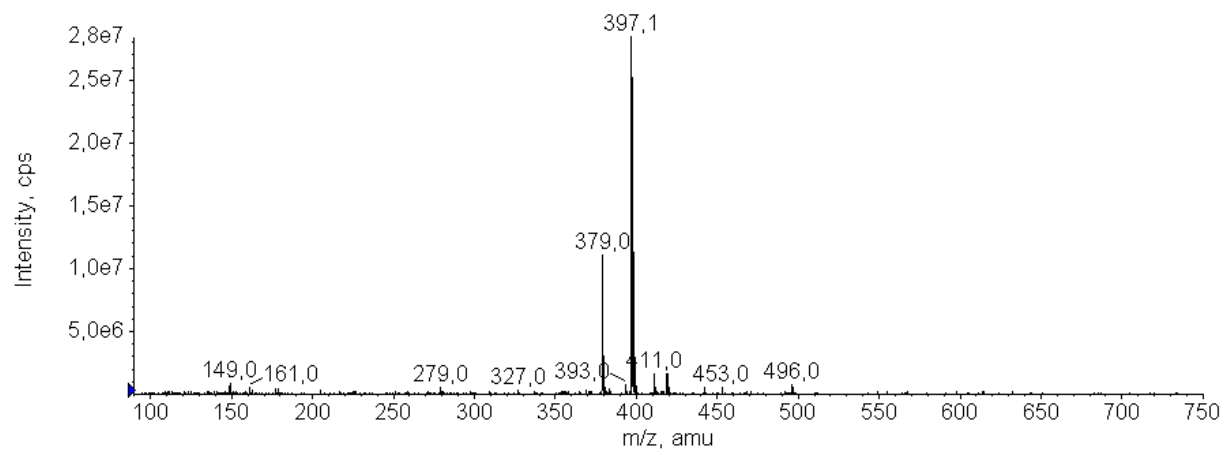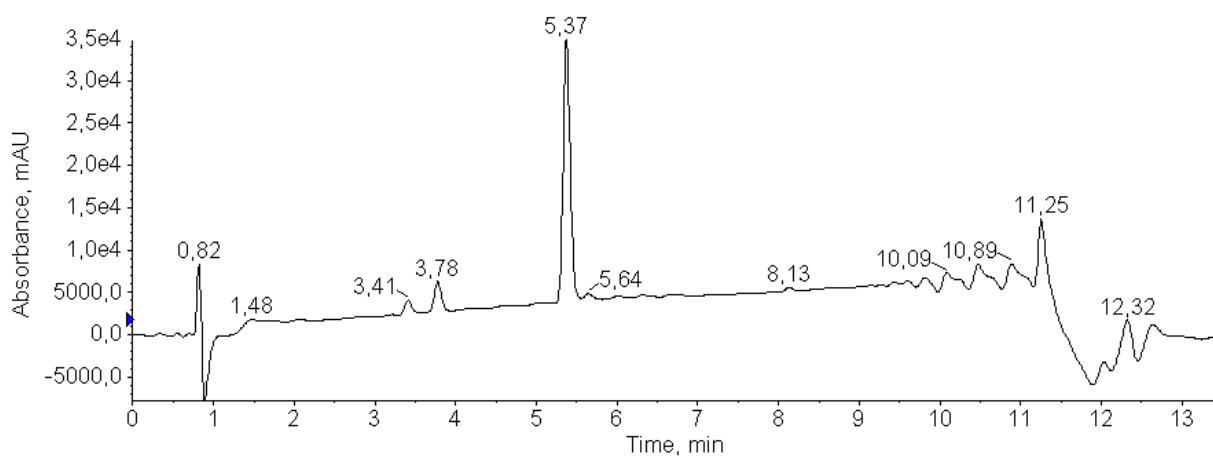

**Supporting Information Figure 21:** LC/MS analysis of **Scaff10-6**. Upper panel: Mass spectrum. Lower panel: according chromatogram.

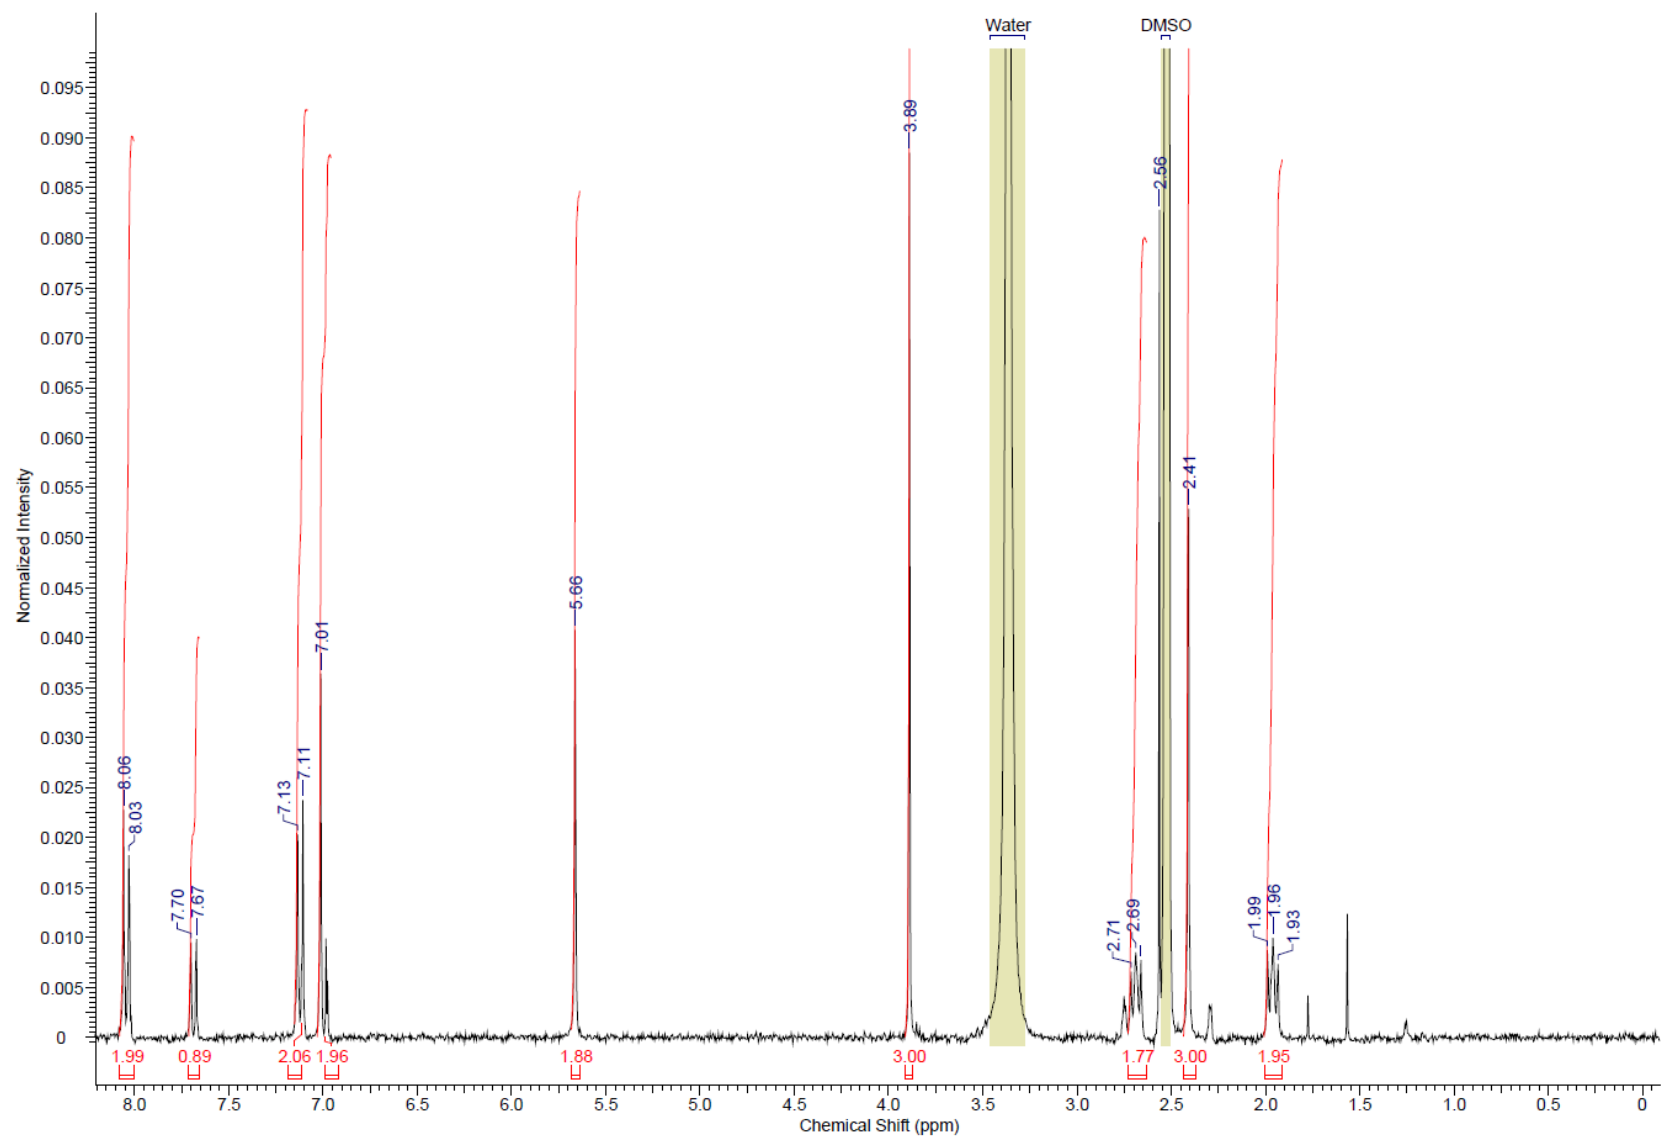

Supporting Information Figure 22: <sup>1</sup>H NMR spectrum of Scaff10-6, 300 MHz, DMSO-d<sub>6</sub>.

4.1.12 Ethyl 3-[7-[2-(4-methoxyphenyl)-2-oxo-ethoxy]-4-methyl-2-oxo-chromen-3-yl]propanoate (**Scaff10-7**)

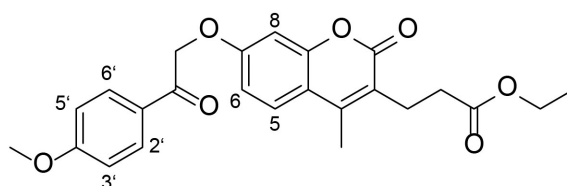

Ethyl 3-(7-hydroxy-4-methyl-2-oxo-chromen-3-yl)propanoate (**5a**) (100 mg, 0.36 mmol) was solved in acetone and preactivated with potash in excess (125 mg, 0.90 mmol) by 55 °C. The  $\alpha$ -haloketone 2-bromo-1-(4-methoxyphenyl)ethanone (**2b**) was added (90 mg, 0.39 mmol). The mixture was refluxed at the same temperature for 16 h. The product was precipitated using 1 M H<sub>2</sub>SO<sub>4</sub> and and recrystallised in ethanol. The final product gave a white solid in 75 % yield (114 mg).

<sup>1</sup>H NMR (300 MHz, DMSO-d<sub>6</sub>):  $\delta$ (ppm) = 1.11 – 1.23 (t, J = 7.32 Hz, 3H, -CH<sub>2</sub>-CH<sub>3</sub>), 2.39 – 2.45 (s, 3H, Ar-CH<sub>3</sub>), 2.46 – 2.53 (t, J = 7.32 Hz, 2H, -CH<sub>2</sub>-CH<sub>2</sub>-COOEt), 2.77 – 2.88 (t, J = 7.32 Hz, 2H, -CH<sub>2</sub>-CH<sub>2</sub>-COOEt), 3.86 – 3.92 (s, 3H, -OCH<sub>3</sub>), 4.01 – 4.11 (q, J = 7.32 Hz, 2H, -CH<sub>2</sub>-CH<sub>3</sub>), 5.66 – 5.72 (s, 2H, -CO-CH<sub>2</sub>-OAr), 6.99 – 7.07 (m, 2H, H<sub>6</sub>, -8), 7.09 – 7.16 (d, J = 8.55 Hz, 2H, H-3', -5'), 7.71 – 7.77 (d, J = 8.55 Hz, 1H, H-5), 8.01 – 8.07 (d, J = 9.77 Hz, 2H, H-2', -6')

ESI-MS: cal. 425.16, exp. 425.1 ([M+H]<sup>+</sup>)

HPLC: 99 % purity at 254 nm

t<sub>R</sub> (HPLC): 6.69 min;  $\lambda_{\max}$  = 284 nm and 318 nm

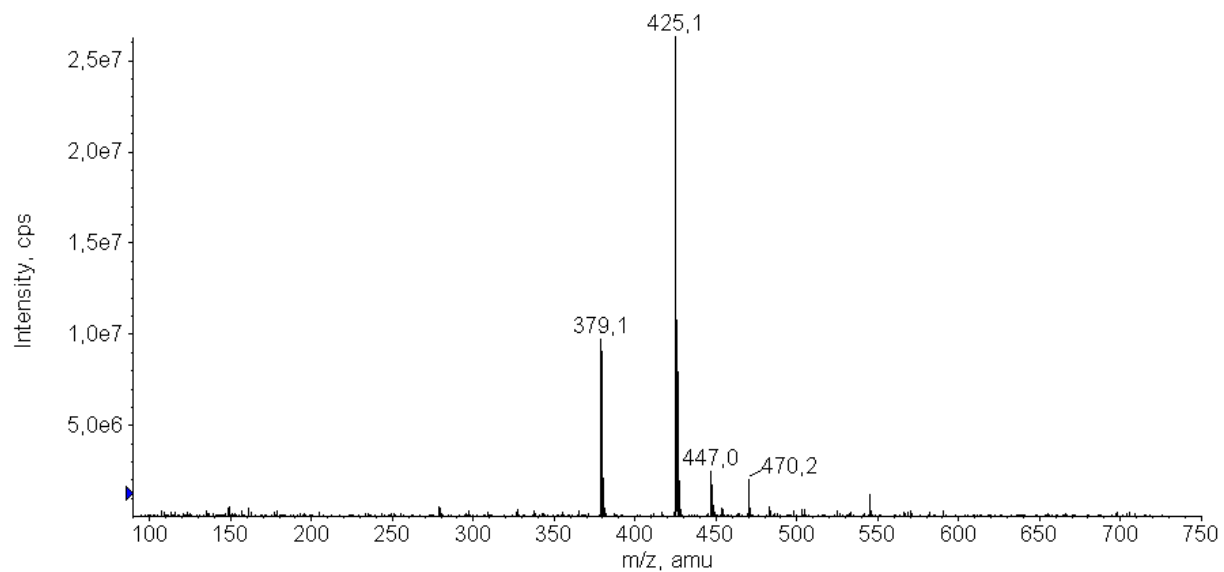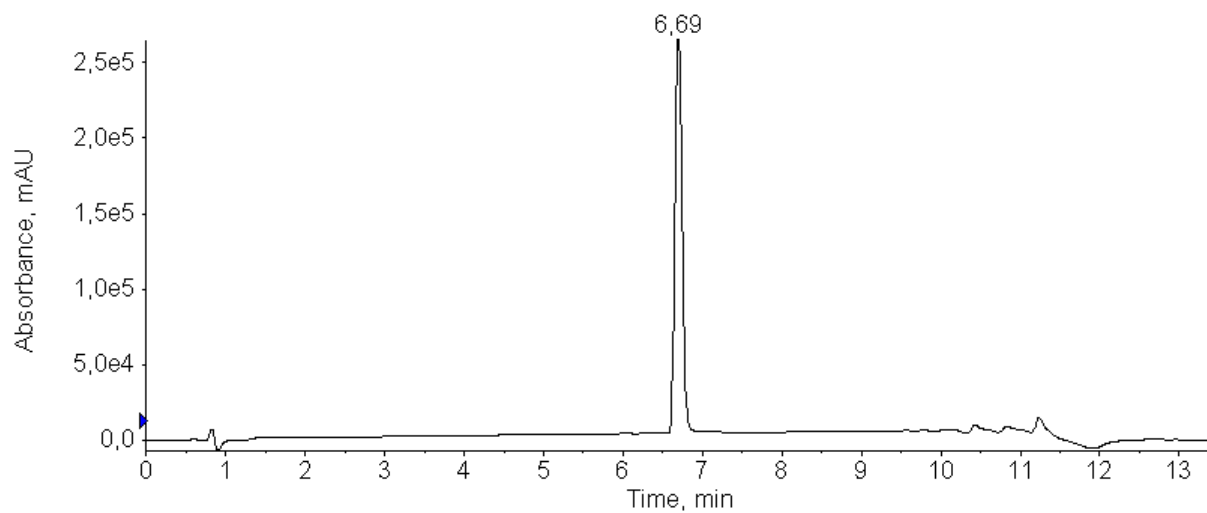

**Supporting Information Figure 23.:** LC/MS analysis of **Scaff10-7**. Upper panel: Mass spectrum. Lower panel: according chromatogram.

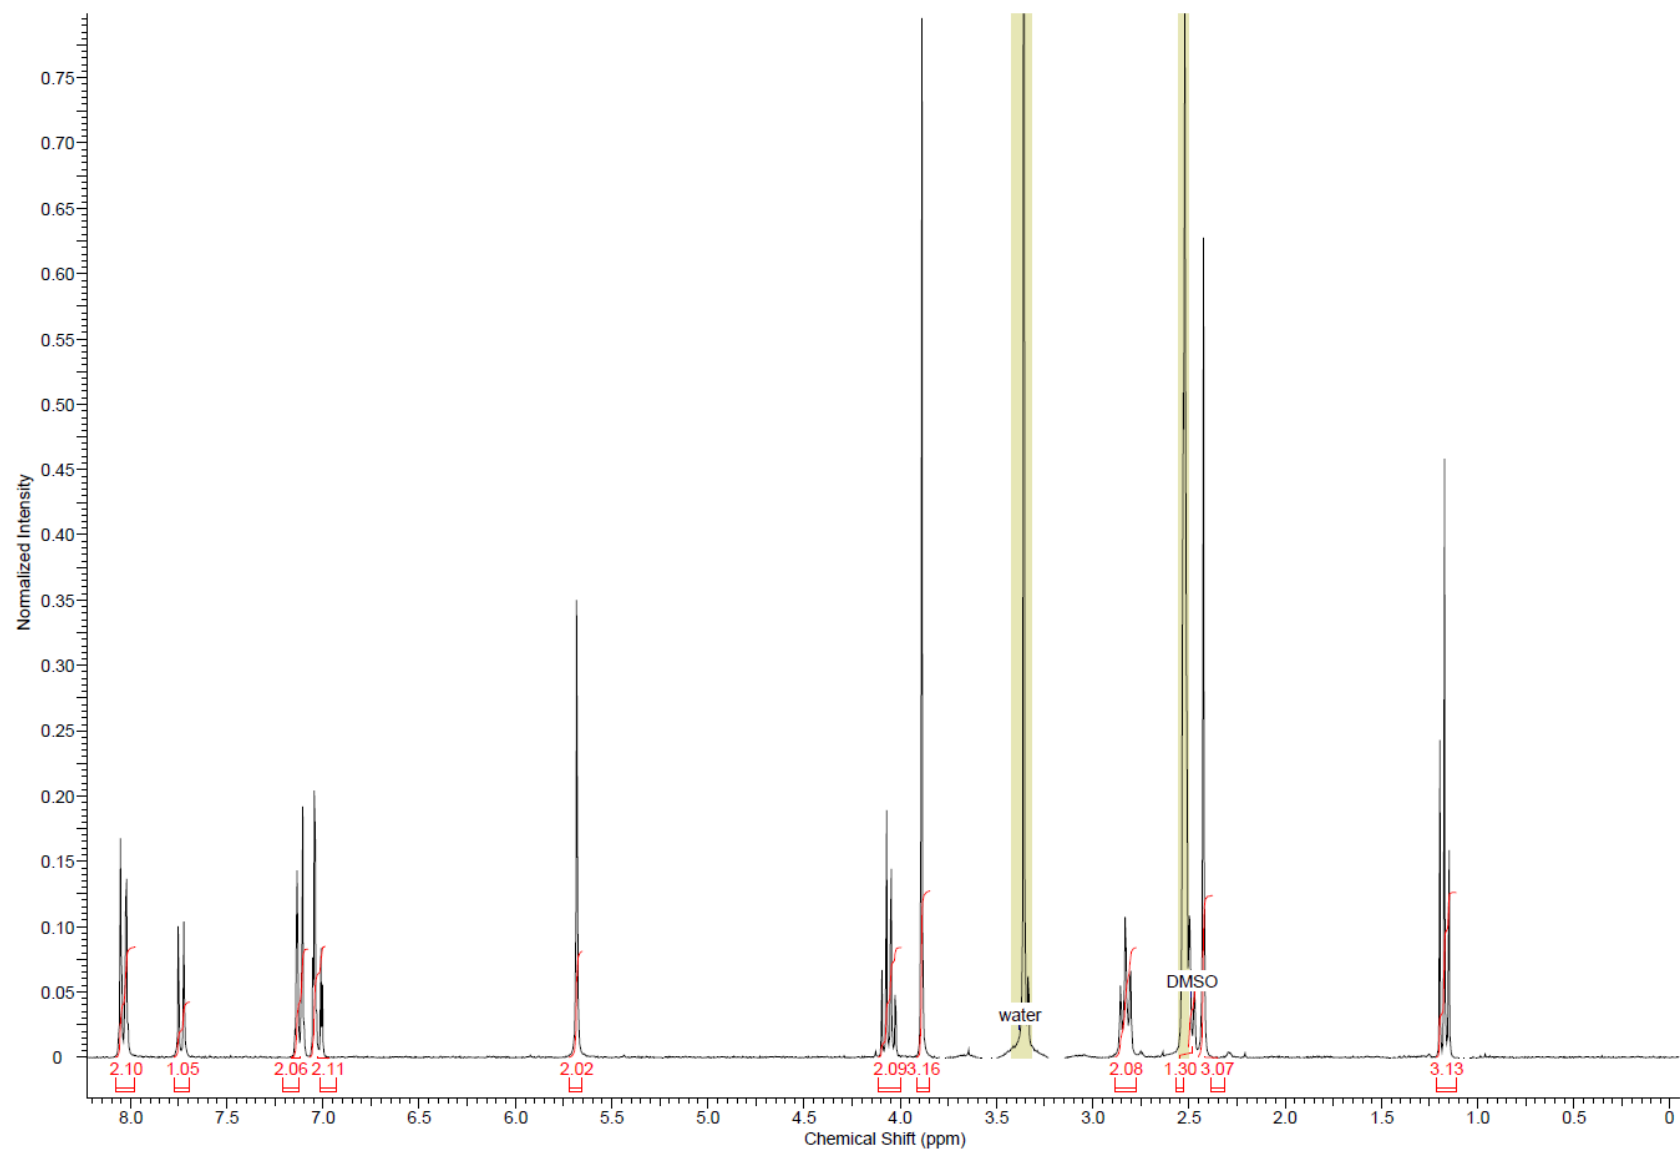

Supporting Information Figure 24:  $^1\text{H}$  NMR spectrum of Scaff10-7, 300 MHz,  $\text{DMSO-d}_6$ .

4.1.13 3-[3-(4-Methoxyphenyl)-5-methyl-7-oxo-furo[3,2-g]chromen-6-yl] propanoic acid (**Scaff10-8**)

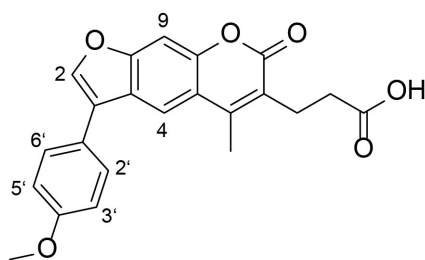

Ethyl 3-[7-[2-(4-methoxyphenyl)-2-oxo-ethoxy]-4-methyl-2-oxo-chromen-3-yl]propanoate (**Scaff10-7**) (200 mg, 0.47 mmol) was saponificated in a mixture of 6 ml dry acetone and 6 ml 1 M sodium hydroxide at 95 °C for 3 h. Dropwise addition of 1 M HCl resulted in precipitation of the product. The precipitated solid was filtered and purified using preparative HPLC with the following gradient: 40 % to 95 % ACN in H<sub>2</sub>O in 80 min. The product eluted at  $t_R = 36.5$  min and was obtained after lyophilisation as yellowish solid in 80 % yield (142 mg).

<sup>1</sup>H NMR (300 MHz, DMSO-d<sub>6</sub>):  $\delta$ (ppm) = 2.39 - 2.46 (t, J = 7.32 Hz, 2H, -CH<sub>2</sub>-CH<sub>2</sub>-COOH), 2.54 - 2.60 (s, 3H, Ar-CH<sub>3</sub>), 2.80 - 2.89 (t, J = 7.32 Hz, 2H, -CH<sub>2</sub>-CH<sub>2</sub>-COOH), 3.79 - 3.86 (s, 3H, -OCH<sub>3</sub>), 7.07 - 7.15 (d, J = 8.55 Hz, 2H, H-3', -5'), 7.71 - 7.78 (m, 3H, H-9, -2', -6'), 8.11 - 8.15 (s, 1H, H-4), 8.34 - 8.40 (s, 1H, H-2)

ESI-MS: cal. 379.11, exp. 379.1 ([M+H]<sup>+</sup>)

HPLC: 99 % purity at 254 nm

$t_R$  (HPLC): 6.35 min;  $\lambda_{max} = 251$  nm and 308 nm



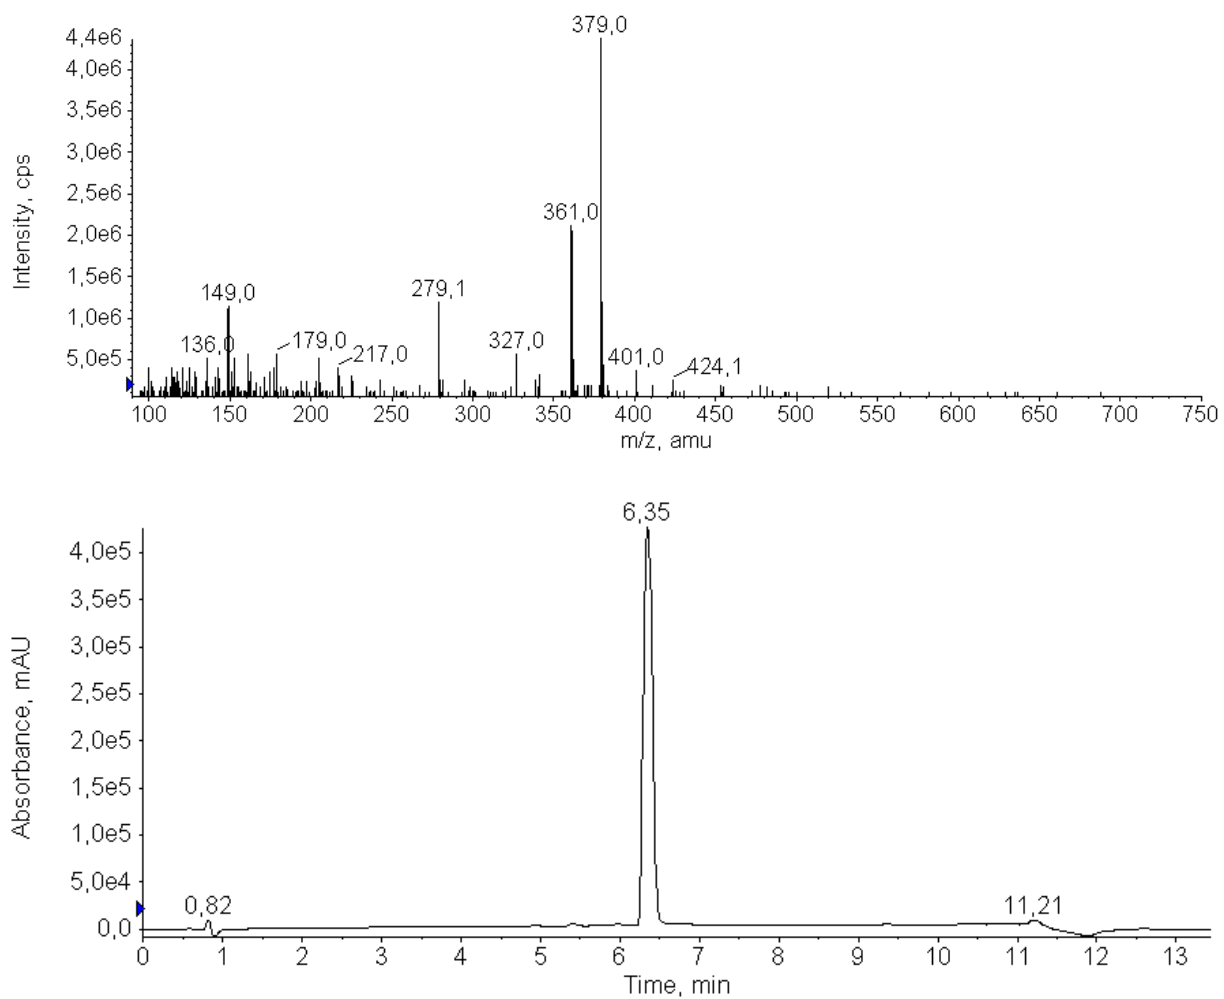

**Supporting Information Figure 25:** LC/MS analysis of **Scaff10-8**. Upper panel: Mass spectrum. Lower panel: according chromatogram.

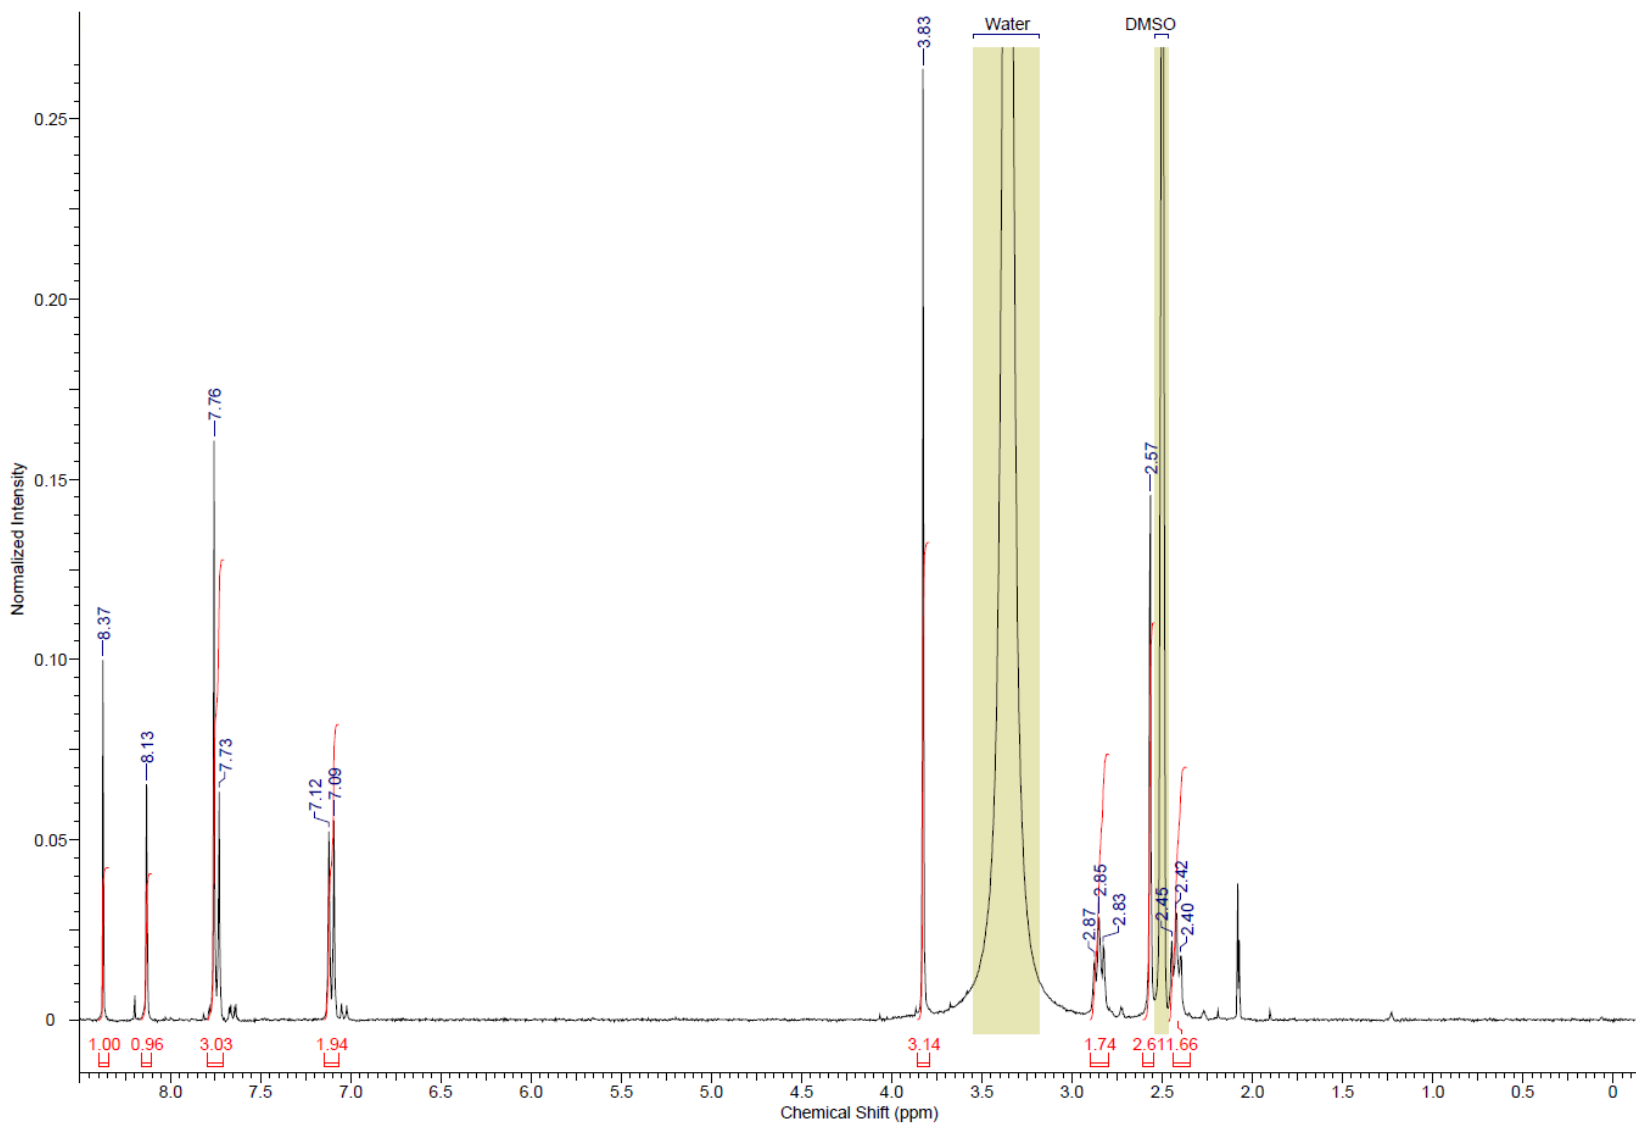

Supporting Information Figure 26: <sup>1</sup>H NMR spectrum of Scaff10-8, 300 MHz, DMSO-d<sub>6</sub>.

4.1.14 *N*-[2-[3-[7-[2-(4-Methoxyphenyl)-2-oxo-ethoxy]-4-methyl-2-oxo-chromen-3-yl]propanoylamino]ethyl]-5-(2-oxo-1,3,3a,4,6,6a-hexahydrothieno[3,4-*d*]imidazol-4-yl)pentanamide (**Scaff10-9**)

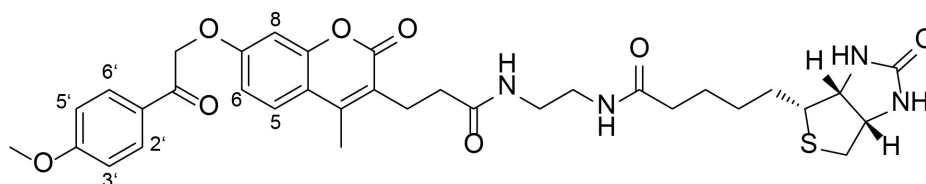

Ethyl 3-[7-[2-(4-methoxyphenyl)-2-oxo-ethoxy]-4-methyl-2-oxo-chromen-3-yl]propanoate (**Scaff10-7**) (10 mg, 0.03 mmol) was condensed with *N*-(2-aminoethyl)-5-(2-oxo-1,3,3a,4,6,6a-hexahydrothieno[3,4-*d*]imidazol-4-yl)pentanamide (8.60 mg, 0.03 mmol) catalysed by 1-[bis(dimethylamino)methylene]-1*H*-1,2,3-triazolo[4,5-*b*]pyridinium 3-oxid hexafluorophosphate (HATU) (11.4 mg, 0.03 mmol) and *N,N*-diisopropylethylamine (DIPEA) as base (12.6 mg, 0.12 mmol). The final product gave a white solid.

No  $^1\text{H}$  NMR spectrum available.

ESI-MS: cal. 665.26, exp. 665.3 ( $[\text{M}+\text{H}]^+$ )

HPLC: 96 % purity at 254 nm

$t_{\text{R}}$  (HPLC): 4.72 min;  $\lambda_{\text{max}}$  = 286 nm and 319 nm

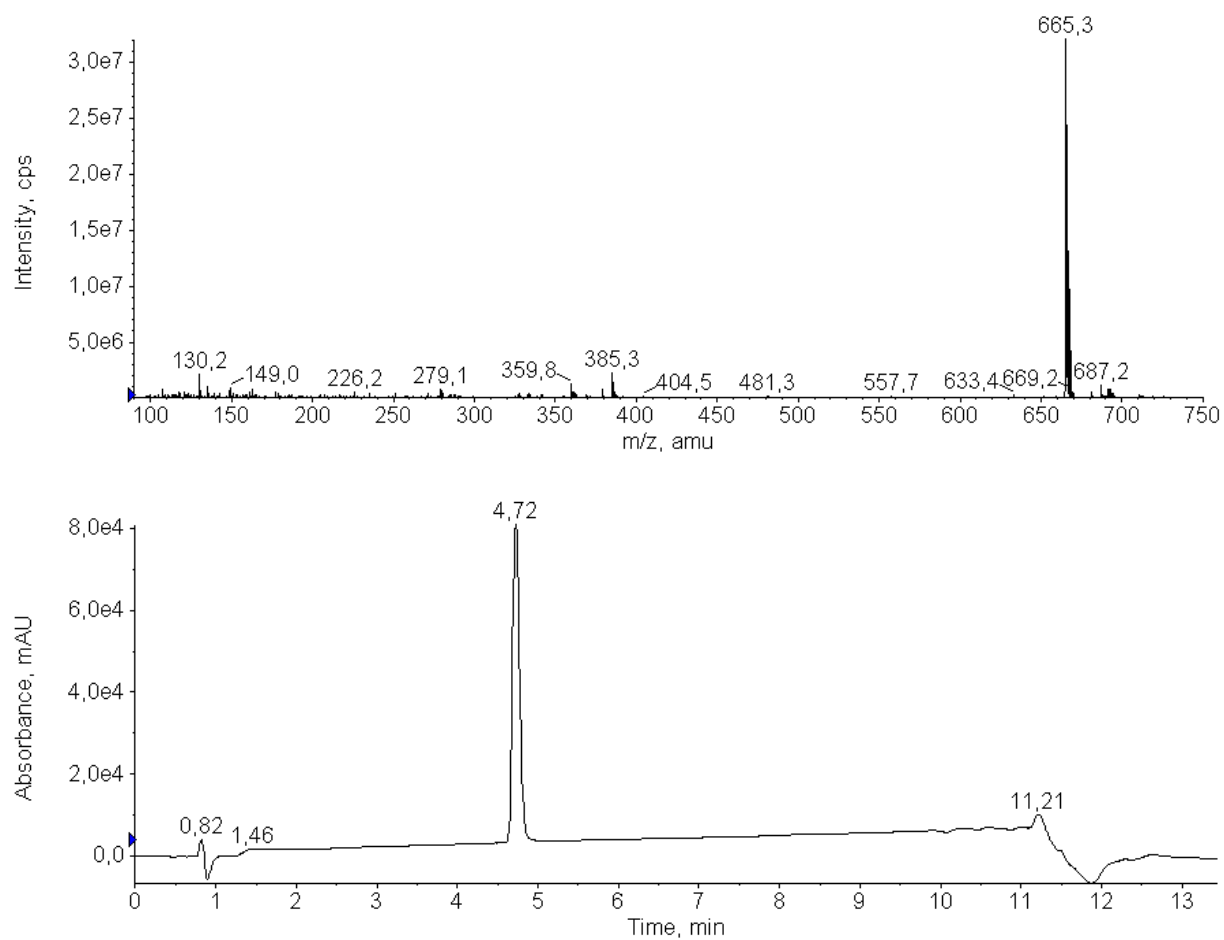

**Supporting Information Figure 27:** LC/MS analysis of **Scaff10-9**. Upper panel: Mass spectrum. Lower panel: according chromatogram.

4.1.15 Ethyl 3-[7-[2-[6-(4-fluorophenyl)-2-methyl-3-pyridyl]-2-oxo-ethoxy]-4-methyl-2-oxo-chromen-3-yl]propanoate (**Scaff10-10**)

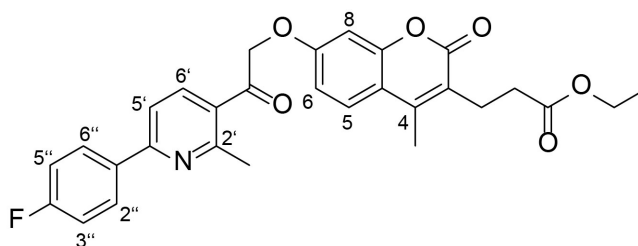

Ethyl 3-(7-hydroxy-4-methyl-2-oxo-chromen-3-yl)propanoate (**5a**) (100 mg, 0.36 mmol) was solved in 6 ml dry acetone and preactivated with potash in excess (125 mg, 0.90 mmol) by 55 °C. The  $\alpha$ -haloketone 2-bromo-1-(6-(4-fluorophenyl)-2-methylpyridin-3-yl)ethanone (**2d**) was added (127 mg, 0.41 mmol). The mixture was refluxed at the same temperature for 16 h. The product was precipitated using 1 M H<sub>2</sub>SO<sub>4</sub> and recrystallised in ethanol. The final product gave a white solid in 66 % yield (120 mg).

<sup>1</sup>H NMR (300 MHz, DMSO-d<sub>6</sub>):  $\delta$ (ppm) = 1.10 – 1.21 (t, J = 7.32 Hz, 3H, -CH<sub>2</sub>-CH<sub>3</sub>), 2.04 – 2.36 (s, 3H, Ar-CH<sub>3</sub>), 2.43 – 2.52 (t, J = 8.54 Hz, 2H, -CH<sub>2</sub>-CH<sub>2</sub>-COOEt), 2.63 – 2.75 (s, 3H, -C2'-CH<sub>3</sub>), 2.76 – 2.87 (t, J = 8.54 Hz, 2H, -CH<sub>2</sub>-CH<sub>2</sub>-COOEt), 4.00 – 4.09 (q, J = 7.32 Hz, 2H, -CH<sub>2</sub>-CH<sub>3</sub>), 5.60 – 5.68 (s, 2H, -CO-CH<sub>2</sub>-OAr), 6.99 – 7.06 (d, J = 8.55 Hz, 1H, H-6), 7.06 – 7.10 (s, 1H, H-8), 7.31 – 7.42 (t, J = 8.54 Hz, 2H, H-3'', -5''), 7.69 – 7.77 (d, J = 9.77 Hz, 1H, H-5'), 7.99 – 8.06 (d, J = 8.55 Hz, 1H, H-5), 8.22 – 8.31 (d, J = 8.55 Hz, 2H, H-2'', -6''), 8.42 – 8.49 (d, J = 9.77 Hz, 1H, H-6')

ESI-MS: cal. 504.18, exp. 504.1 ([M+H]<sup>+</sup>)

HPLC: 97 % purity at 254 nm

t<sub>R</sub> (HPLC): 7.28 min;  $\lambda_{\max}$  = 310 nm

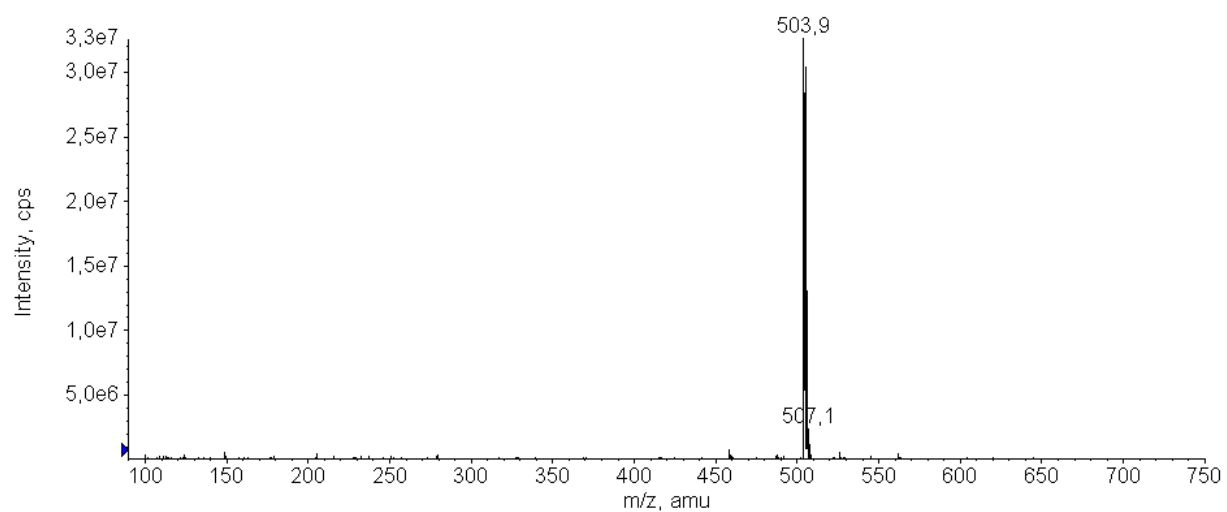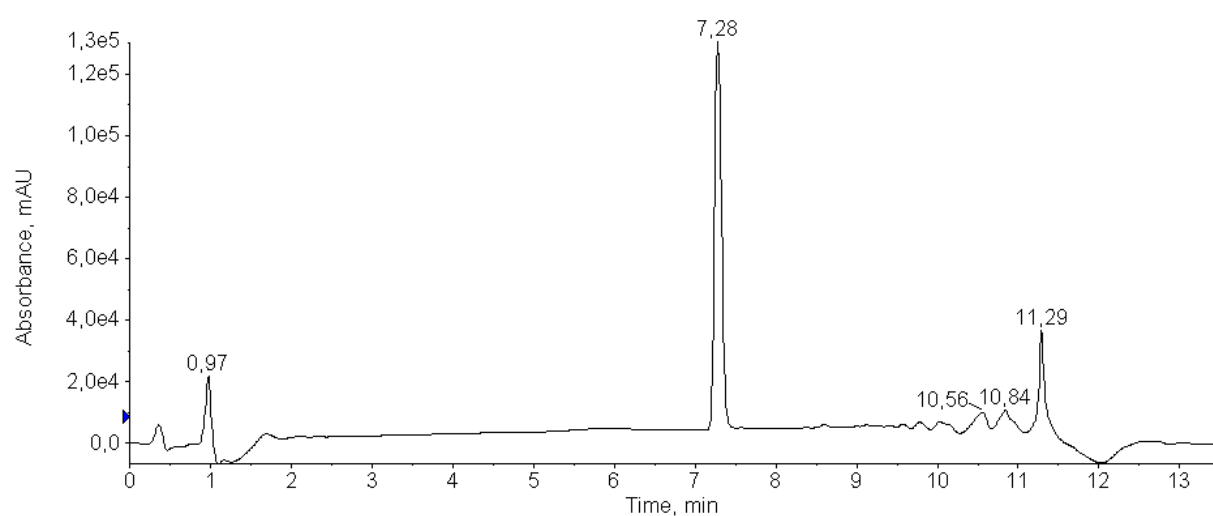

**Supporting Information Figure 28:** LC/MS analysis of **Scaff10-10**. Upper panel: Mass spectrum. Lower panel: according chromatogram.

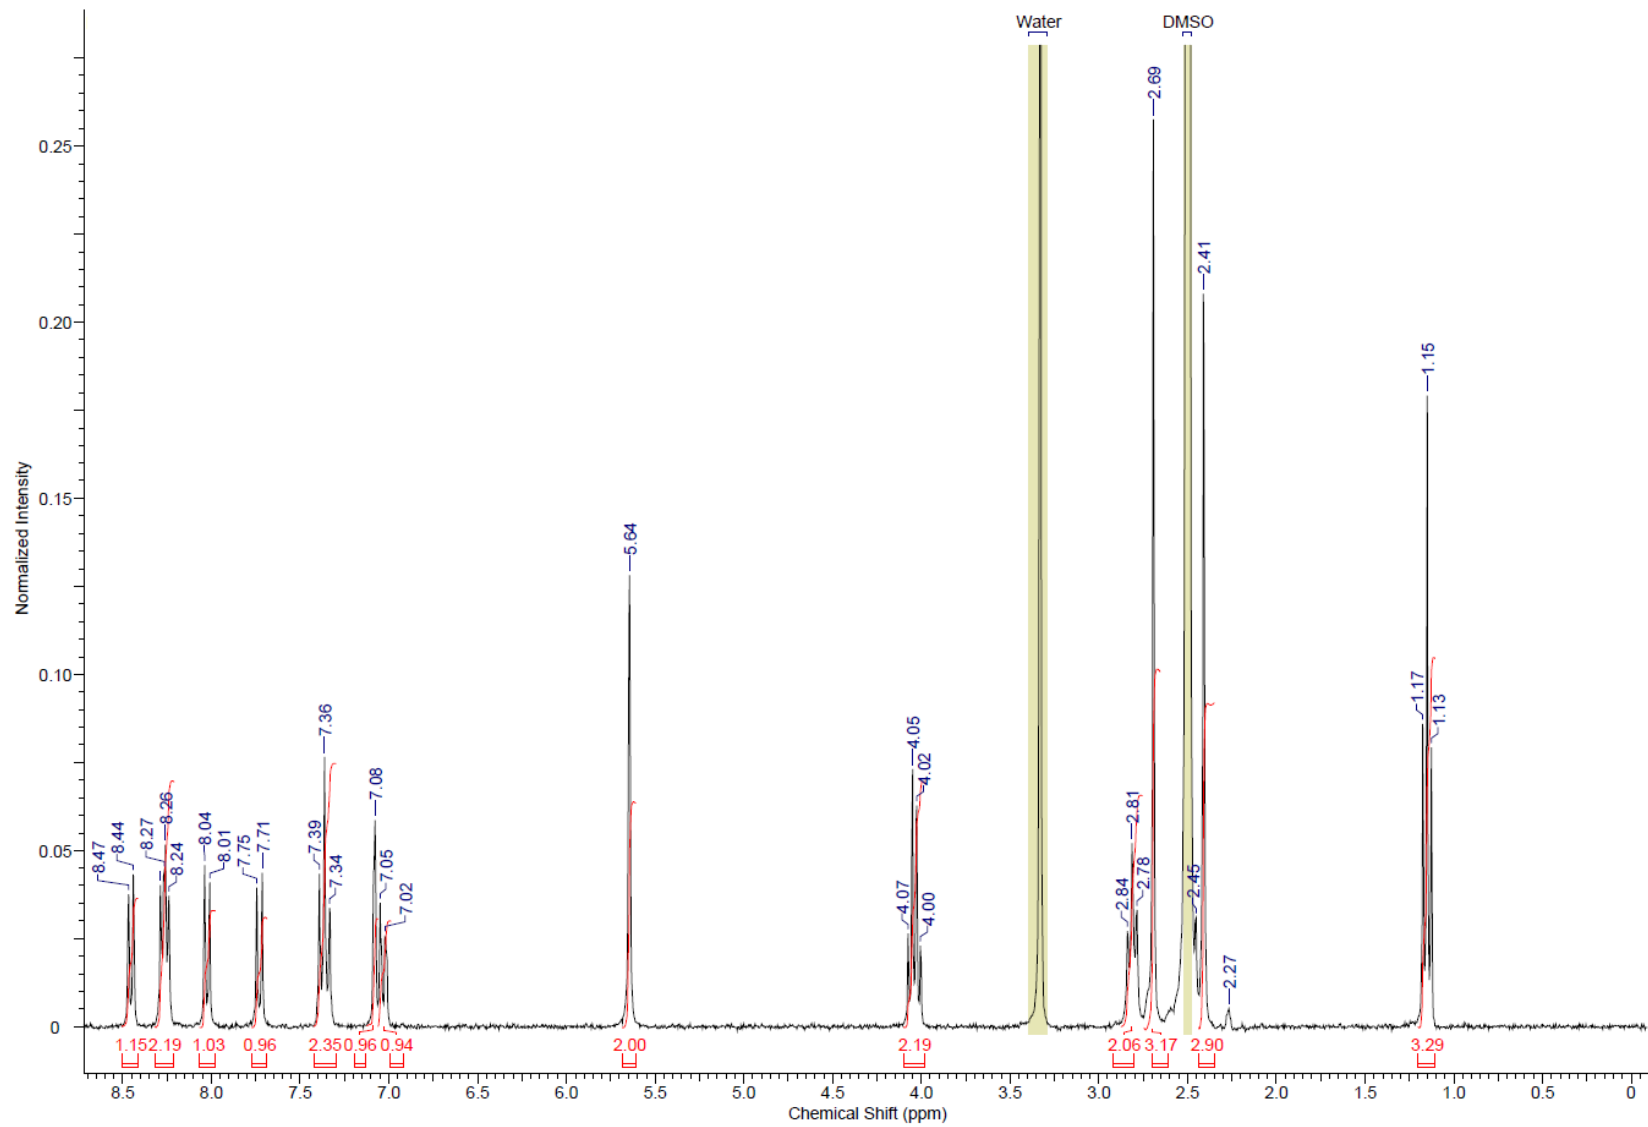

Supporting Information Figure 29:  $^1\text{H}$  NMR spectrum of **Scaff10-10**, 300 MHz,  $\text{DMSO-d}_6$ .

4.1.16 3-[7-[2-[6-(4-Fluorophenyl)-2-methyl-3-pyridyl]-2-oxo-ethoxy]-4-methyl-2-oxo-chromen-3-yl]propanoic acid (**Scaff10-11**)

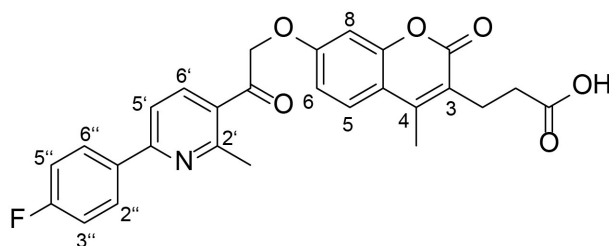

Ethyl 3-[7-[2-[6-(4-fluorophenyl)-2-methyl-3-pyridyl]-2-oxo-ethoxy]-4-methyl-2-oxo-chromen-3-yl]propanoate (**Scaff10-10**) (50 mg, 0.10 mmol) was saponificated in 2 ml 1 M sodium hydroxide at 55 °C for 3 h. Dropwise addition of 1 M H<sub>2</sub>SO<sub>4</sub> resulted in precipitation of the product. The precipitated solid was filtered. The final product gave a yellowish solid.

Due to the pure yield, no <sup>1</sup>H NMR spectrum was obtained.

ESI-MS: cal. 476.15, exp. 476.1 ([M+H]<sup>+</sup>)

HPLC: 98 % purity at 254 nm

t<sub>R</sub> (HPLC): 6.62 min; λ<sub>max</sub> = 310 nm



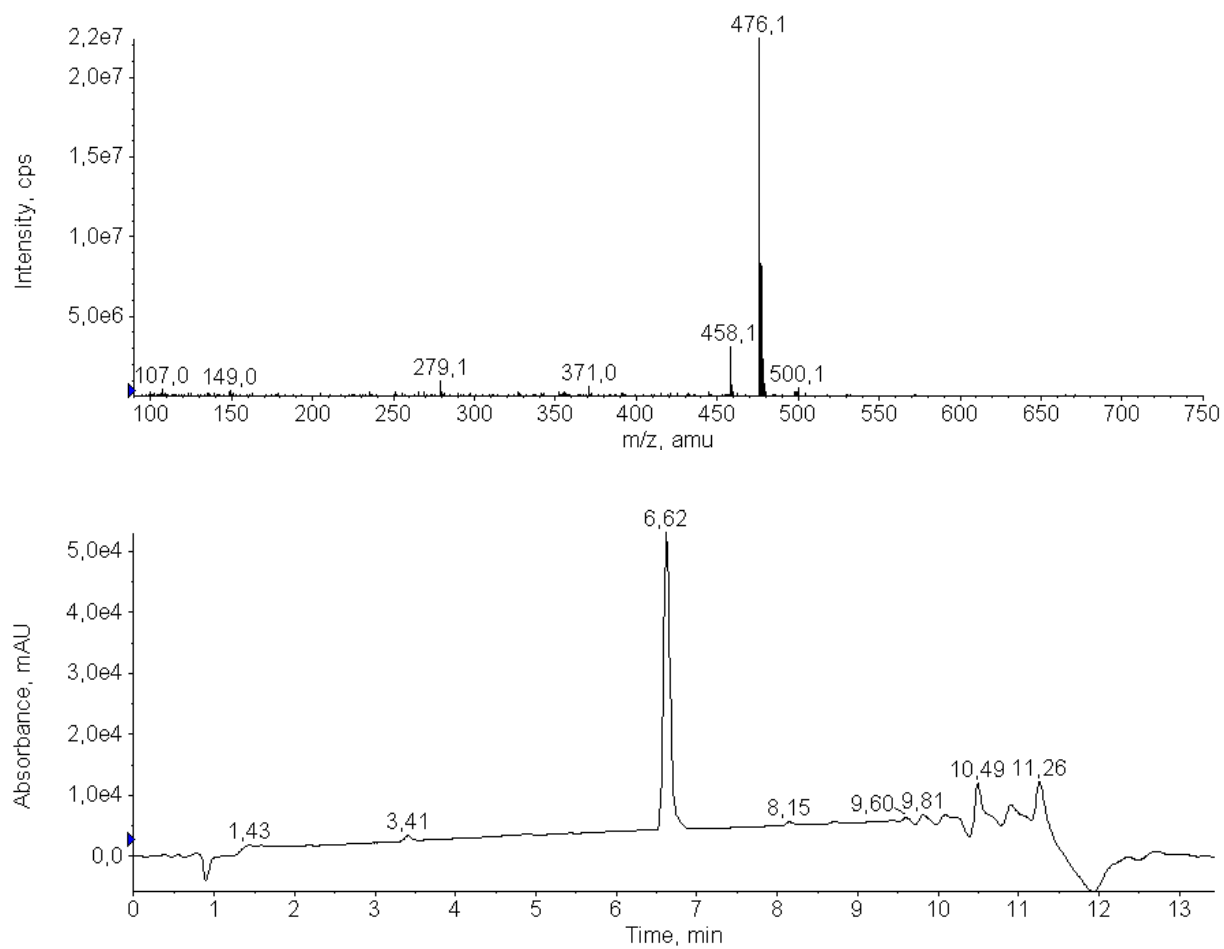

**Supporting Information Figure 30:** LC/MS analysis of **Scaff10-11**. Upper panel: Mass spectrum. Lower panel: according chromatogram.

4.1.17 3,4-Dimethyl-7-[2-(2-naphthyl)-2-oxo-ethoxy]chromen-2-one (**Scaff10-12**)

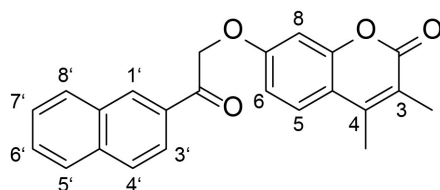

7-Hydroxy-3,4-dimethyl-chromen-2-one (**5b**) (100 mg, 0.50 mmol) was solved in 5 ml acetone and preactivated with potash in excess (182 mg, 1.31 mmol) at 55 °C. The  $\alpha$ -haloketone 2-bromo-1-(2-naphthyl)ethanone (**2e**) was added (137 mg, 0.55 mmol). The mixture was refluxed at the same temperature. The final product after purification gave an ivory white solid in 77 % yield (145 mg).

$^1\text{H-NMR}$  (300 MHz, DMSO- $d_6$ ):  $\delta$ (ppm) = 2.02 – 2.12 (s, 3H, -C3-CH $_3$ ), 2.30 – 2.42 (s, 3H, -C4-CH $_3$ ), 5.79 – 5.91 (s, 2H, -CO-CH $_2$ -OAr), 7.00 – 7.08 (dd, J = 2.44 Hz, 8.55 Hz, 1H, H-6), 7.08 – 7.12 (d, J = 2.44 Hz, 1H, H-8), 7.61 – 7.75 (m, 3H, H-5, -3', -6'), 7.98 – 8.13 (m, 4H, H-4', -5', -7', -1'), 8.76 – 8.80 (s, 1H, H-8')

ESI-MS: cal. 359.12, exp. 359.1 ([M+H] $^+$ )

HPLC: 95 % purity at 254 nm

$t_R$  (HPLC): 7.16 min;  $\lambda_{\text{max}}$  = 295 nm and 318 nm

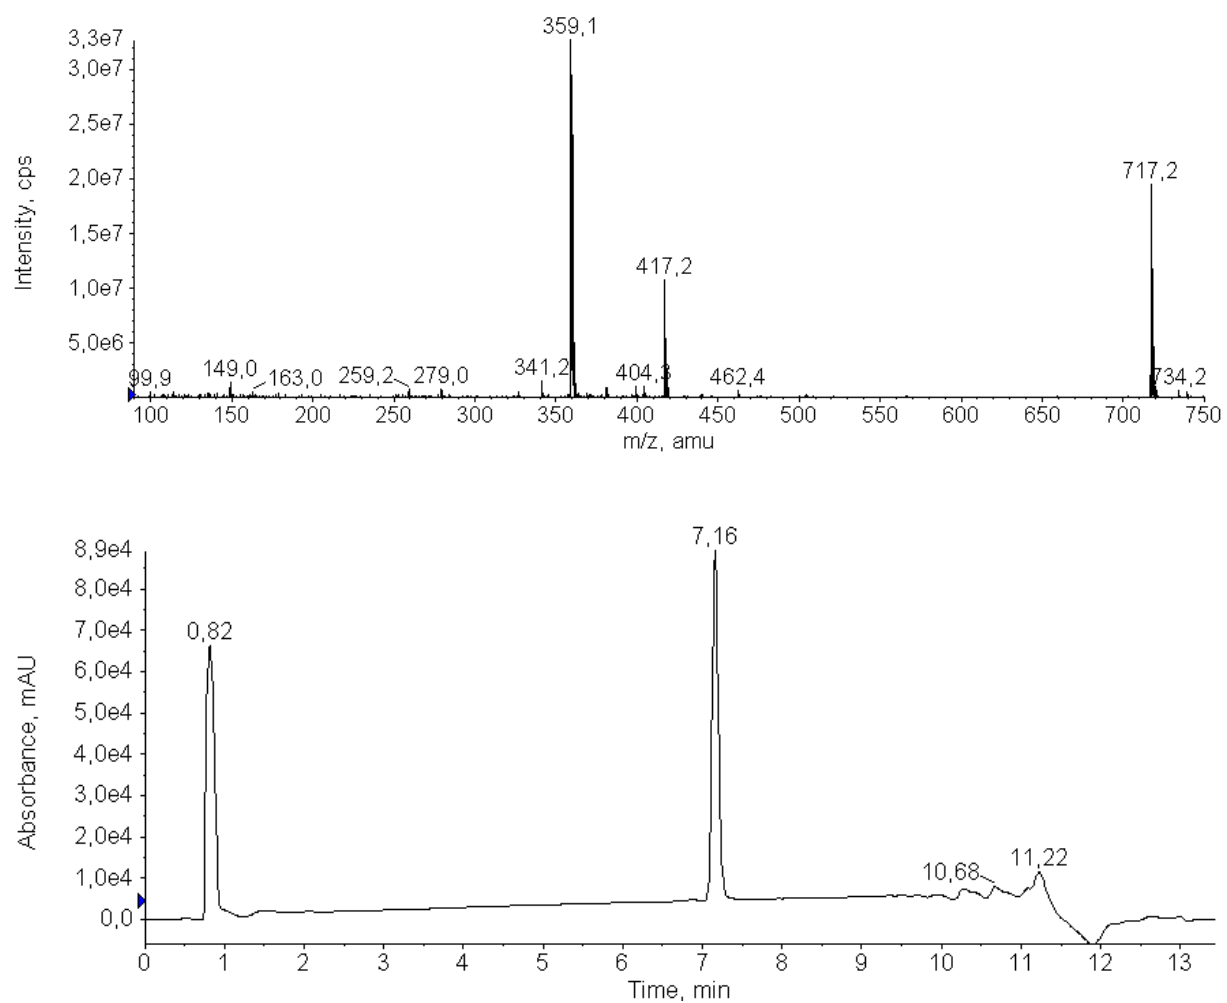

**Supporting Information Figure 31:** LC/MS analysis of **Scaff10-12**. Upper panel: Mass spectrum. Lower panel: according chromatogram.

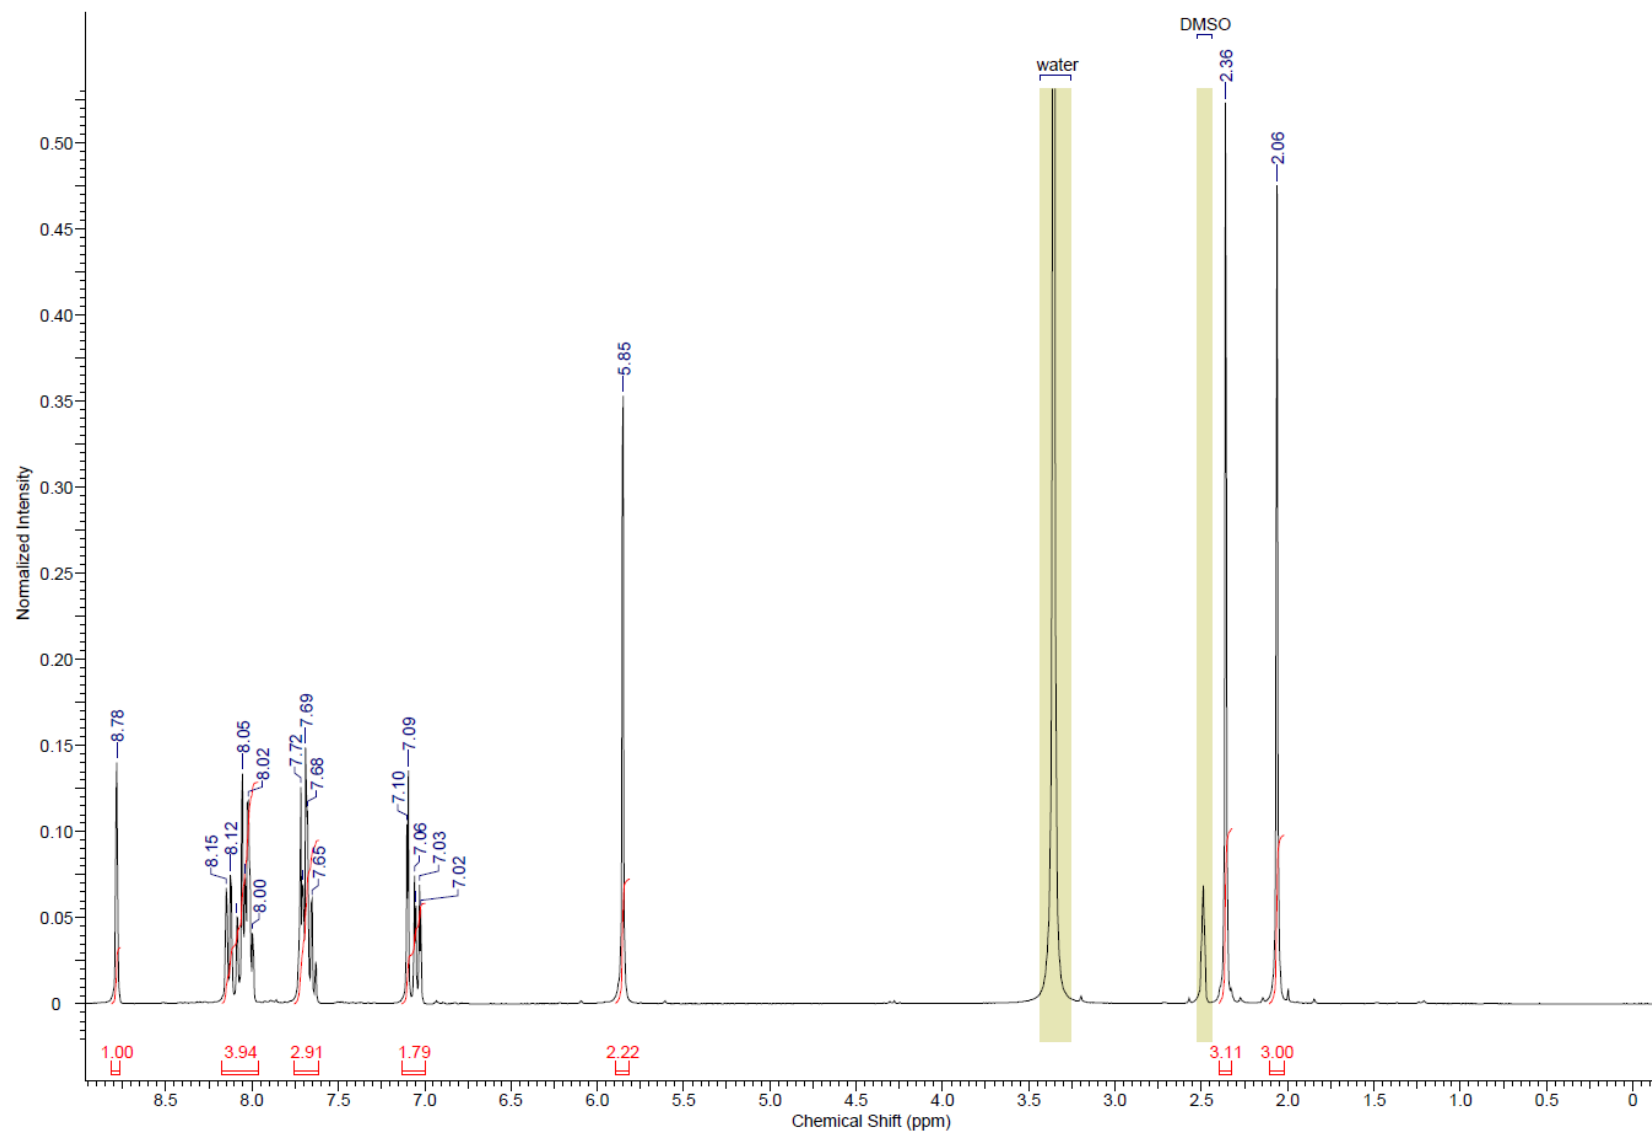

Supporting Information Figure 32:  $^1\text{H}$  NMR spectrum of **Scaff10-12**, 300 MHz,  $\text{DMSO-d}_6$ .

4.1.18 3,4-Dimethyl-7-[2-oxo-2-(4-phenylphenyl)ethoxy]chromen-2-one (**Scaff10-13**)

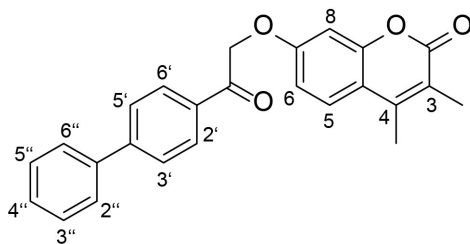

7-Hydroxy-3,4-dimethyl-chromen-2-one (**5b**) (100 mg, 0.50 mmol) was solved in 5 ml acetone and preactivated with potash in excess (182 mg, 1.31 mmol) at 55 °C. The  $\alpha$ -haloketone 2-bromo-1-(4-phenylphenyl)ethanone (**2f**) was added (138 mg, 0.55 mmol). The mixture was refluxed at the same temperature. The final product after purification gave an orange-yellowish solid in 92 % yield (177 mg).

$^1\text{H}$  NMR (300 MHz, DMSO- $d_6$ ):  $\delta$ (ppm) = 2.06 – 2.14 (s, 3H, -C3-CH $_3$ ), 2.37 – 12.43 (s, 3H, -C4-CH $_3$ ), 5.76 – 5.81 (s, 2H, -CO-CH $_2$ -OAr), 7.02 – 7.08 (dd, J = 2.44 Hz, 8.54 Hz, 1H, H-6), 7.09 – 7.11 (d, J = 2.44 Hz, 1H, H-8), 7.44 – 7.59 (m, 3H, H-3'', -4'', -5''), 7.71 – 7.76 (d, J = 8.54 Hz, 1H, H-5), 7.78 – 7.83 (d, J = 7.32 Hz, 2H, H-2'', -6''), 7.89 – 7.94 (d, J = 8.54 Hz, 2H, H-3', 5'), 8.12 – 8.18 (d, J = 8.55 Hz, 2H, H-2', 6')

ESI-MS: cal. 385.14, exp. 385.1 ([M+H] $^+$ )

HPLC: 98 % purity at 254 nm

$t_R$  (HPLC): 7.55 min;  $\lambda_{\text{max}}$  = 293 nm and 310 nm

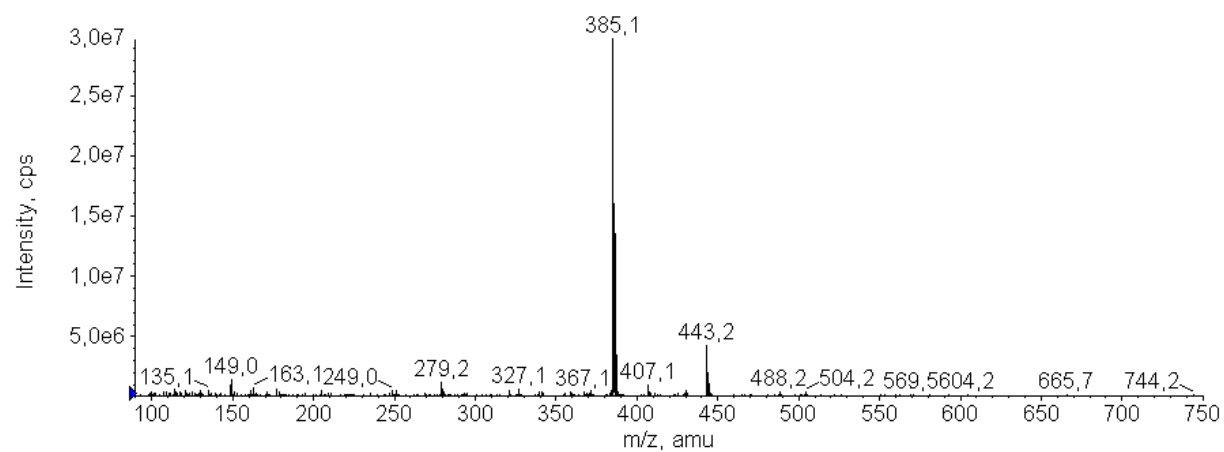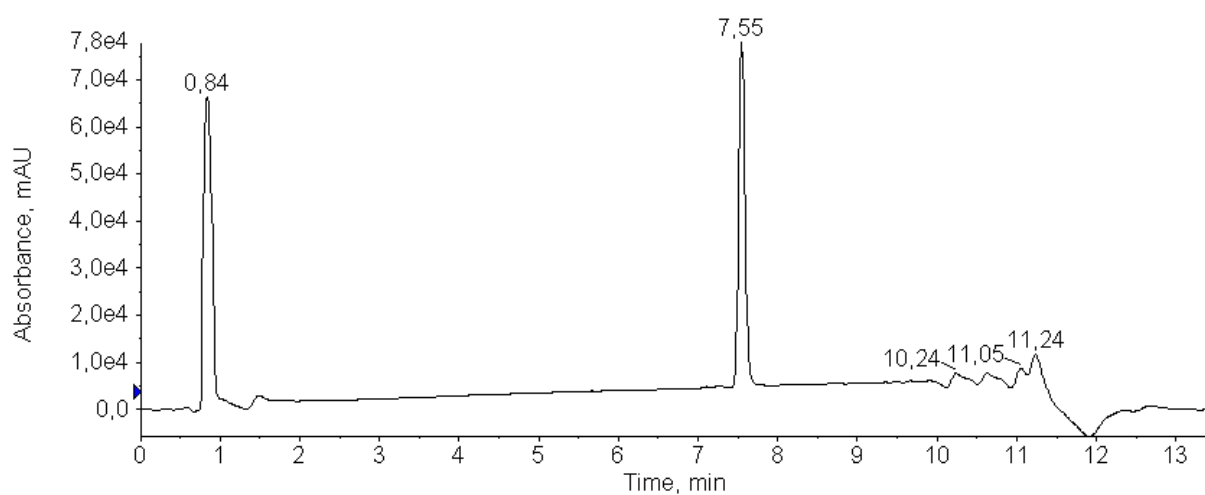

**Supporting Information Figure 33:** LC/MS analysis of **Scaff10-13**. Upper panel: Mass spectrum. Lower panel: according chromatogram.

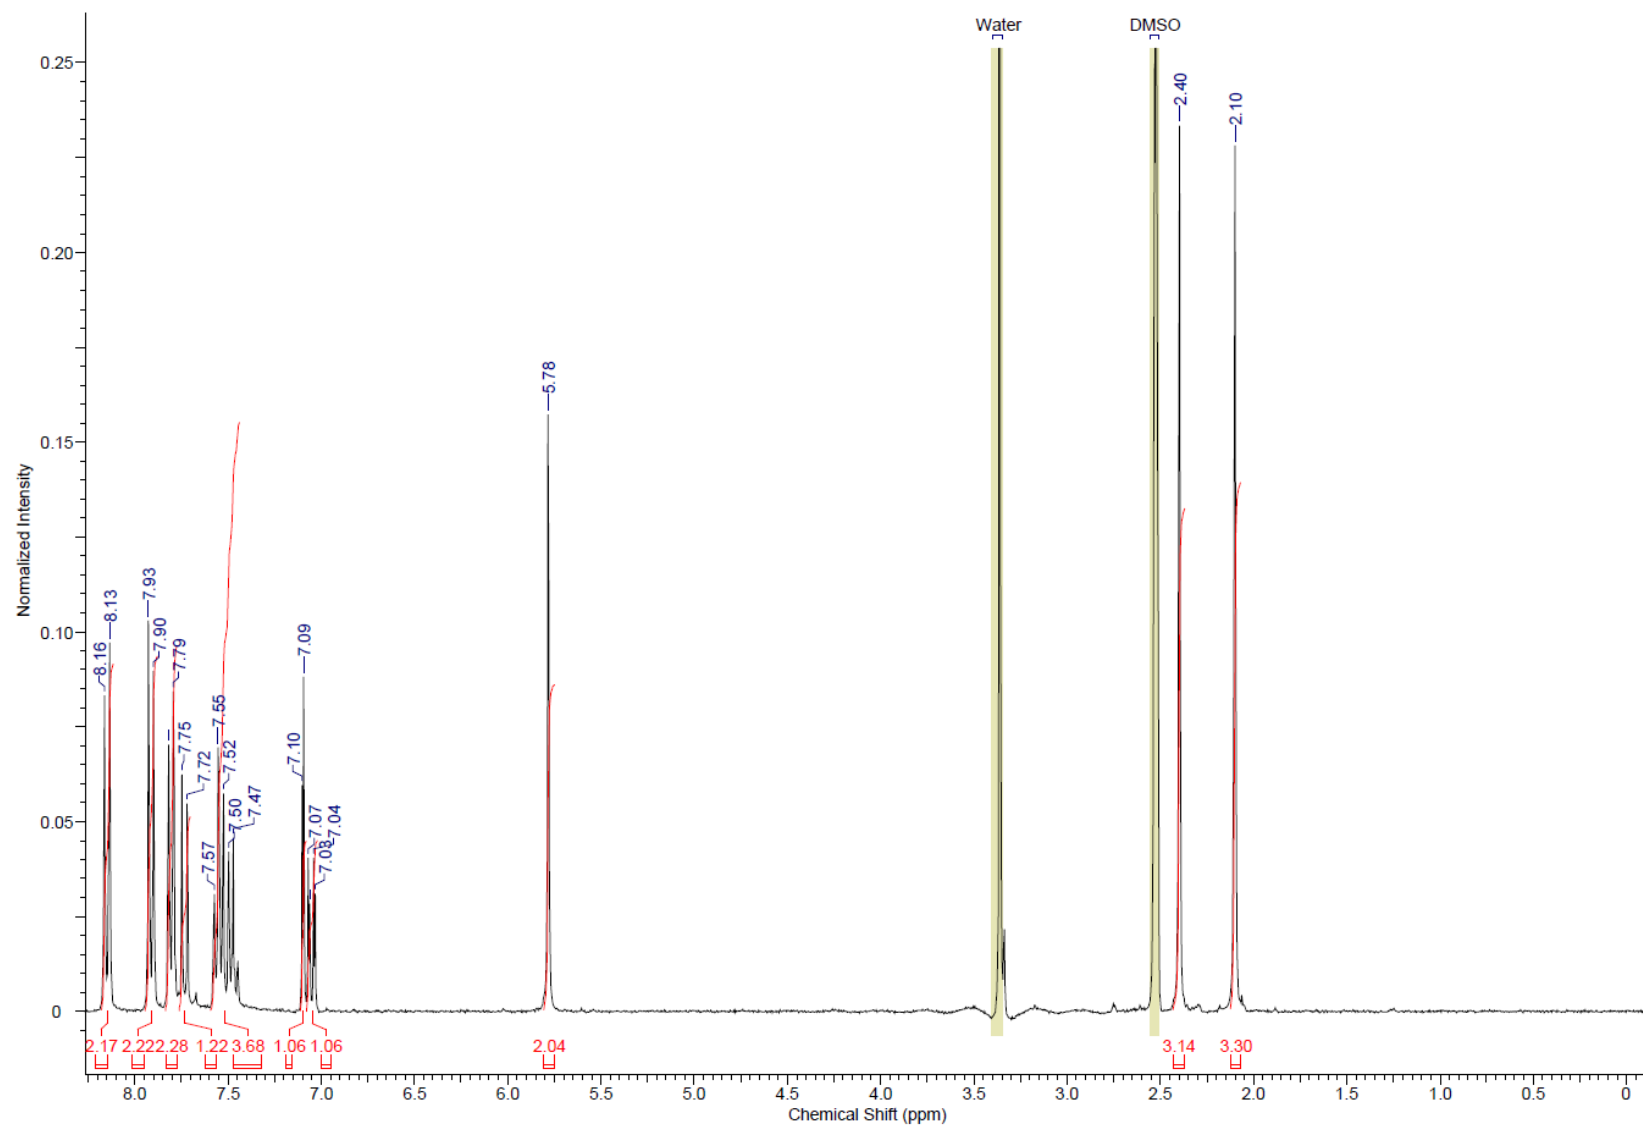

Supporting Information Figure 34:  $^1\text{H}$  NMR spectrum of **Scaff10-13**, 300 MHz,  $\text{DMSO-d}_6$ .

4.1.19 3,4-Dimethyl-7-[2-oxo-2-(4-phenoxyphenyl)ethoxy]chromen-2-one (**Scaff10-14**)

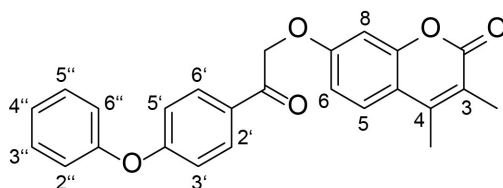

7-Hydroxy-3,4-dimethyl-chromen-2-one (**5b**) (50 mg, 0.26 mmol) was solved in 3 ml acetone and preactivated with potash in excess (106 mg, 0.76 mmol) at 55 °C. The  $\alpha$ -haloketone 2-bromo-1-(4-phenoxyphenyl)ethanone (**2g**) was added (96 mg, 0.33 mmol). The mixture was refluxed at the same temperature for 16 h. The final product after purification gave a white solid in 97 % yield (101 mg).

$^1\text{H}$  NMR (300 MHz,  $\text{DMSO-d}_6$ ):  $\delta$ (ppm) = 2.01 – 2.13 (s, 3H, -C3- $\text{CH}_3$ ), 2.30 – 2.42 (s, 3H, -C4- $\text{CH}_3$ ), 5.61 – 5.72 (s, 2H, -CO- $\text{CH}_2$ -OAr), 6.95 – 7.04 (m, 2H, H-6, -8), 7.61 – 7.75 (m, 4H, H-3', -5', -2'', -6''), 7.22 – 7.30 (t,  $J = 7.33$  Hz, 1H, H-4''), 7.43 – 7.51 (t,  $J = 7.33$  Hz, 2H, H-3'', -5''), 7.66 – 7.72 (d,  $J = 8.55$  Hz, 1H, H-5), 8.02 – 8.09 (d,  $J = 9.77$  Hz, 2H, H-2', -6')

ESI-MS: cal. 401.13, exp. 401.1 ( $[\text{M}+\text{H}]^+$ )

HPLC: 95 % purity at 254 nm

$t_R$  (HPLC): 7.63 min;  $\lambda_{\text{max}} = 277$  nm and 315 nm



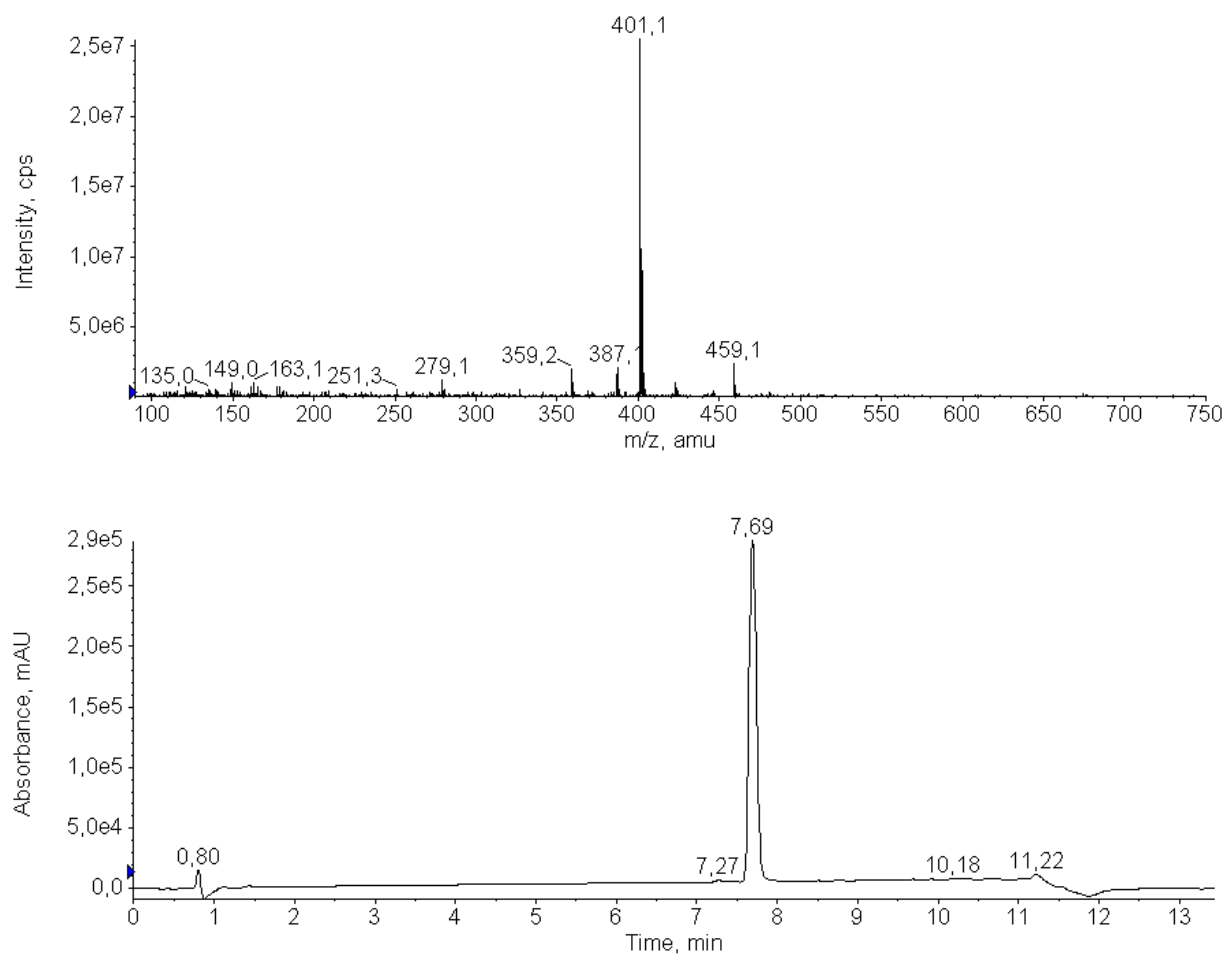

**Supporting Information Figure 35:** LC/MS analysis of **Scaff10-14**. Upper panel: Mass spectrum. Lower panel: according chromatogram.

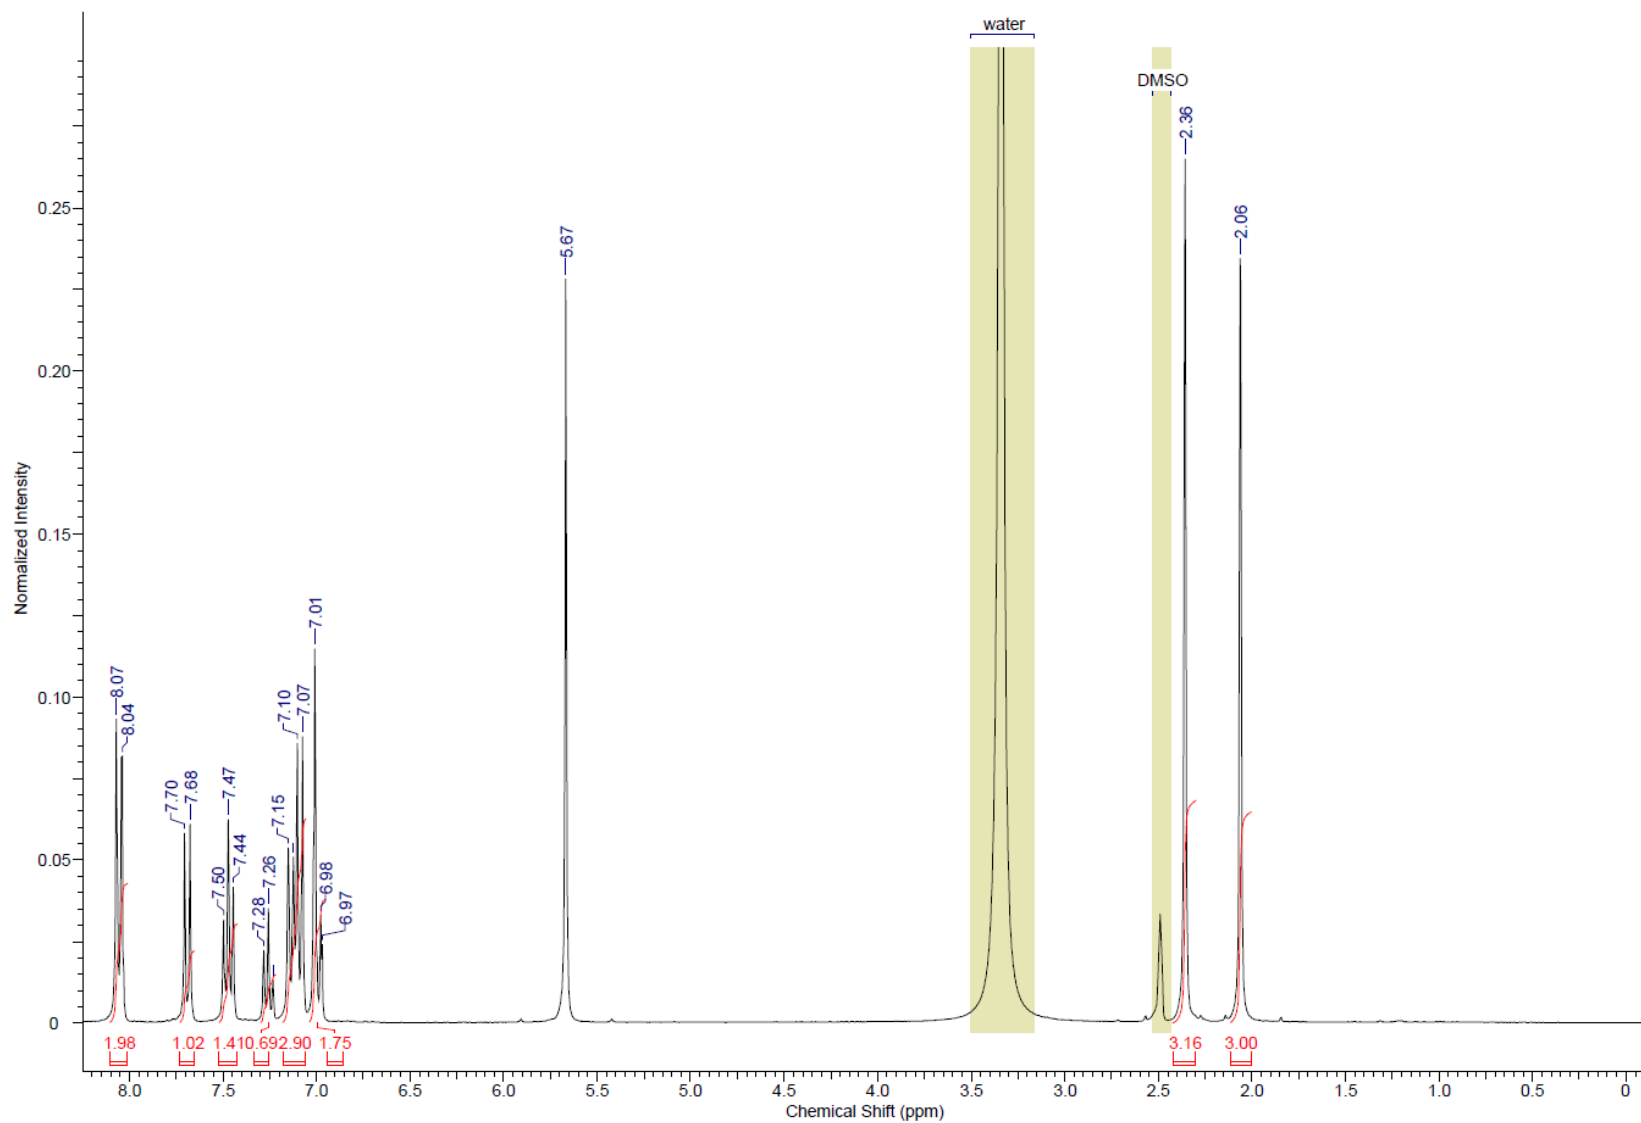

Supporting Information Figure 36: <sup>1</sup>H NMR spectrum of **Scaff10-14**, 300 MHz, DMSO-d<sub>6</sub>.

4.1.20 7-[2-(6-Methoxy-2-naphthyl)-2-oxo-ethoxy]-3,4-dimethyl-chromen-2-one (**Scaff10-15**)

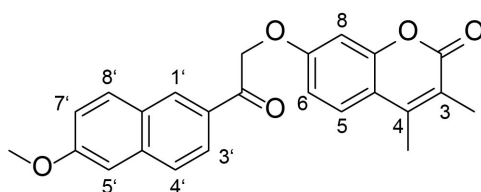

7-Hydroxy-3,4-dimethyl-chromen-2-one (**5b**) (50 mg, 0.26 mmol) was solved in 5 ml acetone and preactivated with potash in excess (106 mg, 0.76 mmol) at 55 °C. The  $\alpha$ -haloketone 2-bromo-1-(6-methoxy-2-naphthyl)ethanone (**2h**) was added (92 mg, 0.33 mmol). The mixture was refluxed at the same temperature. The final product after purification gave a white solid.

$^1\text{H}$  NMR (300 MHz, DMSO- $d_6$ ):  $\delta$ (ppm) = 2.06 – 2.13 (s, 3H, -C3-CH<sub>3</sub>), 2.37 – 2.42 (s, 3H, -C4-CH<sub>3</sub>), 3.92 – 3.99 (s, 3H, -OCH<sub>3</sub>), 5.81 – 5.86 (s, 2H, -CO-CH<sub>2</sub>-OAr), 7.03 – 7.09 (dd, J = 2.44 Hz, 8.54 Hz, 1H, H-6), 7.09 – 7.15 (d, J = 2.44 Hz, 1H, H-8), 7.29 – 7.35 (dd, J = 2.44 Hz, 8.45 Hz, 1H, H-7'), 7.45 – 7.48 (d, J = 2.44 Hz, 1H, H-5'), 7.70 – 7.76 (d, J = .54 Hz, 1H, H-5), 7.94 – 8.09 (m, 3H, H-3', -4', -8'), 8.70 – 8.74 (s, 1H, H-1')

ESI-MS: cal. 389.13, exp. 389.0 ([M+H]<sup>+</sup>)

HPLC: 95 % purity at 254 nm

$t_R$  (HPLC): 7.13 min;  $\lambda_{\text{max}}$  = 273 nm and 322 nm

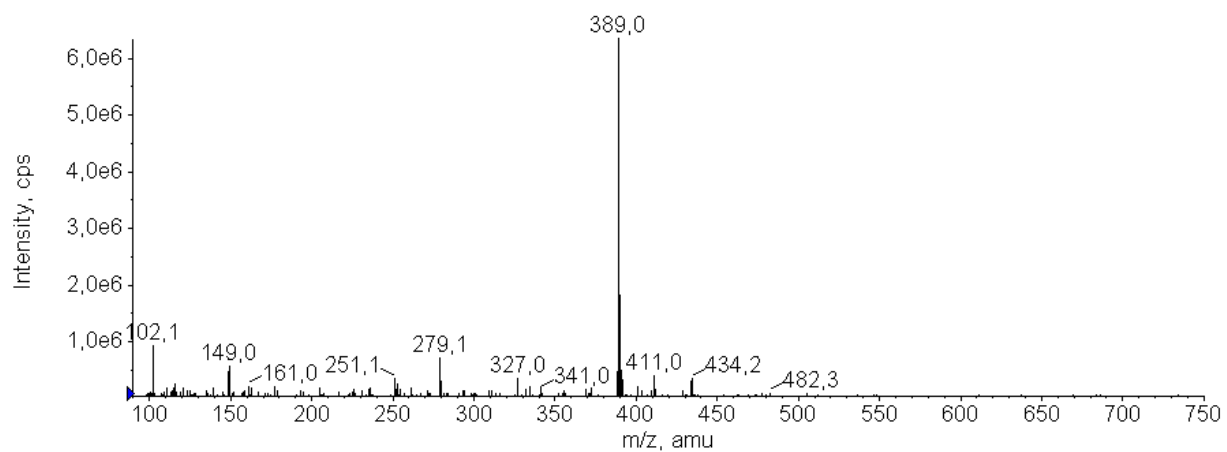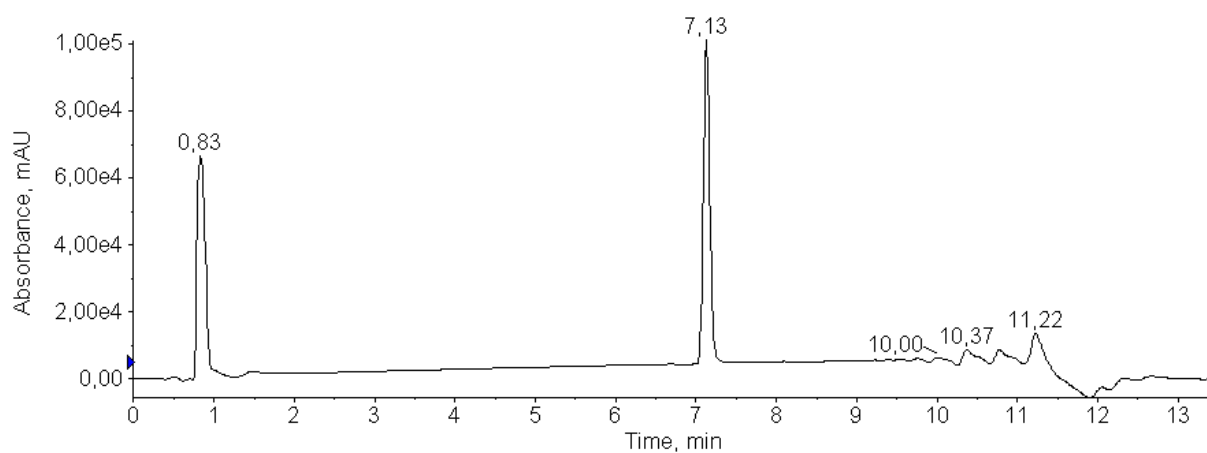

**Supporting Information Figure .:** LC/MS analysis of **Scaff10-15**. Upper panel: Mass spectrum. Lower panel: according chromatogram.

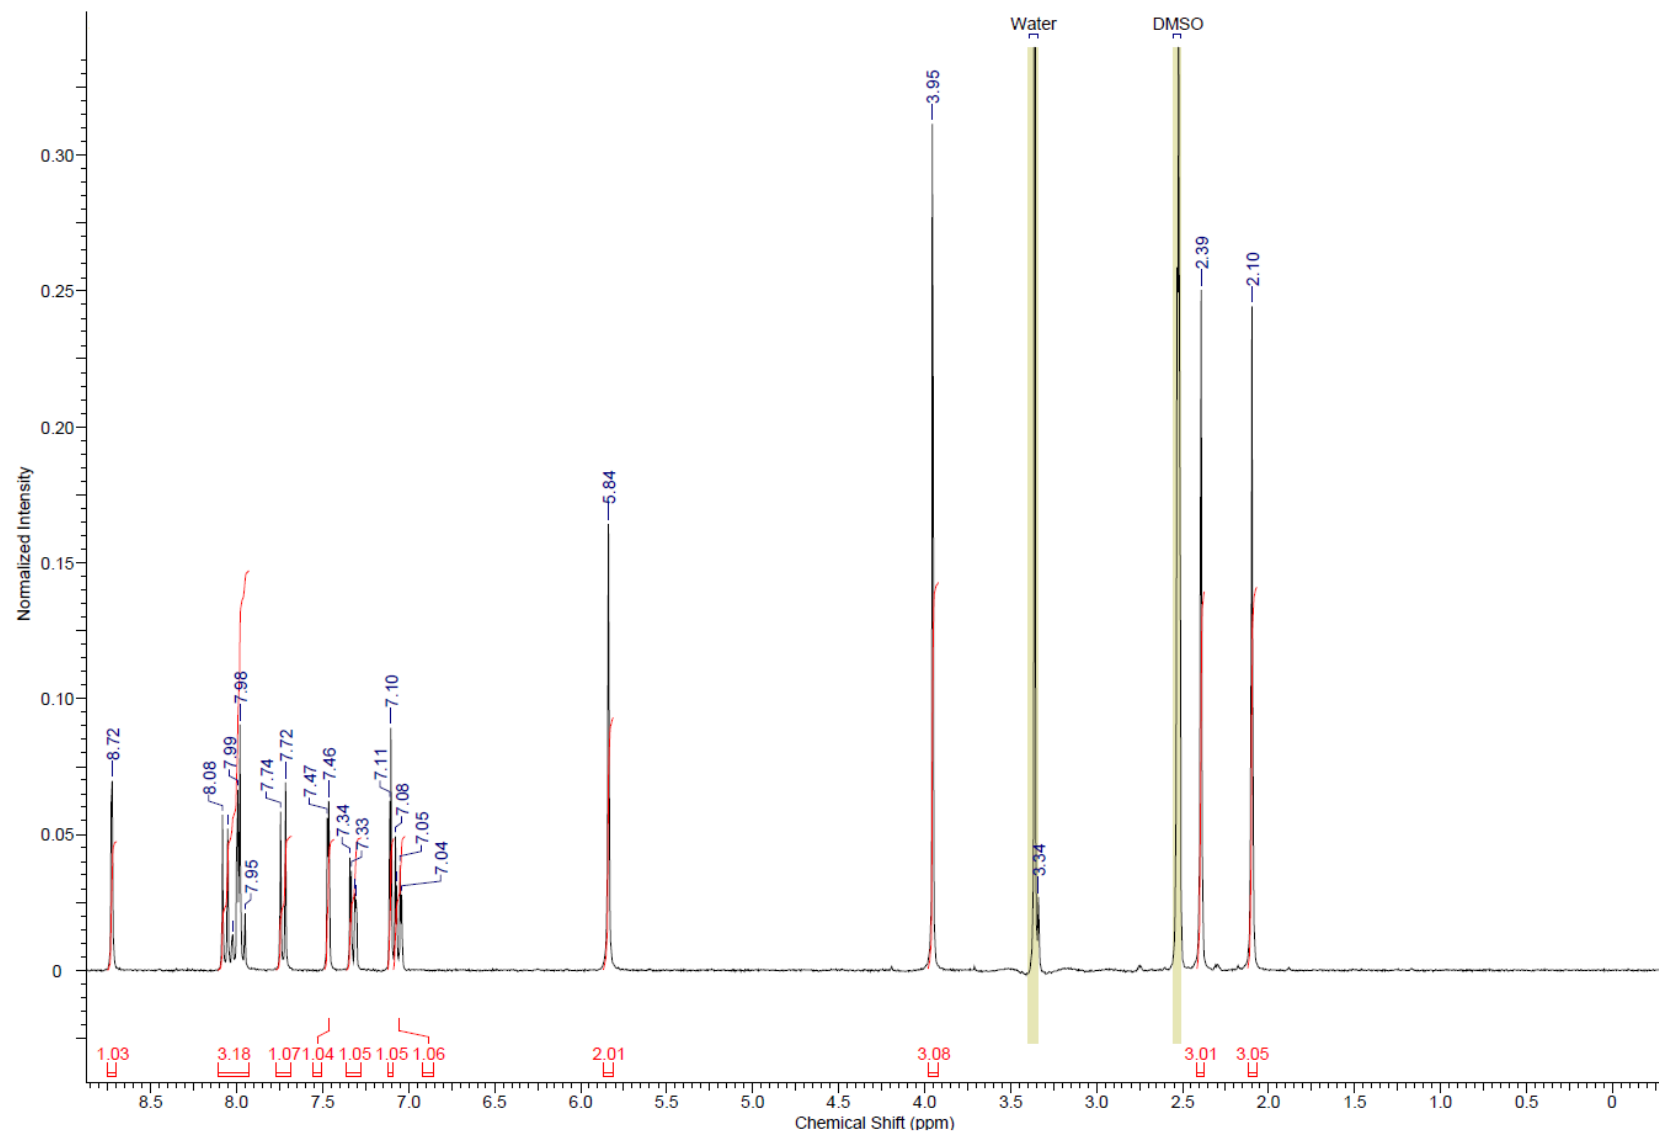

Supporting Information Figure 37:  $^1\text{H}$  NMR spectrum of **Scaff10-15**, 300 MHz,  $\text{DMSO-d}_6$ .

4.1.21 Ethyl 3-[4-methyl-2-oxo-7-[2-oxo-2-(4-phenoxyphenyl)ethoxy]chromen-3-yl]propanoate (**Scaff10-17**)

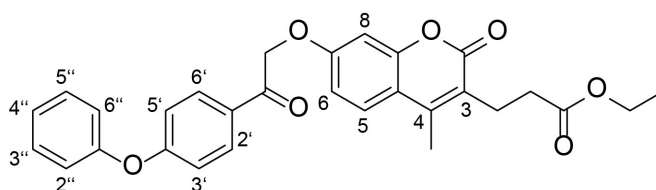

Ethyl 3-(7-hydroxy-4-methyl-2-oxo-chromen-3-yl)propanoate (**5a**) (100 mg, 0.36 mmol) was solved in 6 ml dry acetone and preactivated with potash in excess (125 mg, 0.90 mmol) at 55 °C. The  $\alpha$ -haloketone 2-bromo-1-(4-phenoxyphenyl)ethanone (**2g**) was added (115 mg, 0.39 mmol). The mixture was refluxed at the same temperature for 16 h. The product was precipitated using 1 M H<sub>2</sub>SO<sub>4</sub> and recrystallised in ethanol. The final product gave a dark brown solid.

<sup>1</sup>H NMR (300 MHz, DMSO-d<sub>6</sub>):  $\delta$ (ppm) = 1.09 – 1.23 (t, J = 7.32 Hz, 3H, -CH<sub>2</sub>-CH<sub>3</sub>), 2.34 – 2.43 (s, 3H, Ar-CH<sub>3</sub>), 2.43 – 2.51 (t, J = 8.54 Hz, 2H, -CH<sub>2</sub>-CH<sub>2</sub>-COOEt), 2.75 – 2.87 (t, J = 8.54 Hz, 2H, -CH<sub>2</sub>-CH<sub>2</sub>-COOEt), 3.97 – 4.10 (q, J = 7.32 Hz, 2H, -CH<sub>2</sub>-CH<sub>3</sub>), 5.64 – 5.73 (s, 2H, -CO-CH<sub>2</sub>-OAr), 6.98 – 7.01 (d, J = 2.44 Hz, 1H, H<sub>6</sub>), 7.01 – 7.06 (s, 1H, H-8), 7.06 – 7.12 (d, J = 9.77 Hz, 2H, H-3'', -5''), 7.12 – 7.19 (d, J = 8.54 Hz, 2H, H-2'', -6''), 7.22 – 7.31 (t, J = 7.32 Hz, 1H, H-4''), 7.43 – 7.52 (t, J = 8.54 Hz, 2H, H-3', -5'), 7.68 – 7.75 (d, J = 8.54 Hz, 1H, H-5), 8.02 – 8.10 (d, J = 8.55 Hz, 2H, H-2', -6')

ESI-MS: cal. 487.17, exp. 487.1 ([M+H]<sup>+</sup>)

HPLC: 98 % purity at 254 nm

t<sub>R</sub> (HPLC): 7.40 min;  $\lambda_{\max}$  = 279 nm and 317 nm

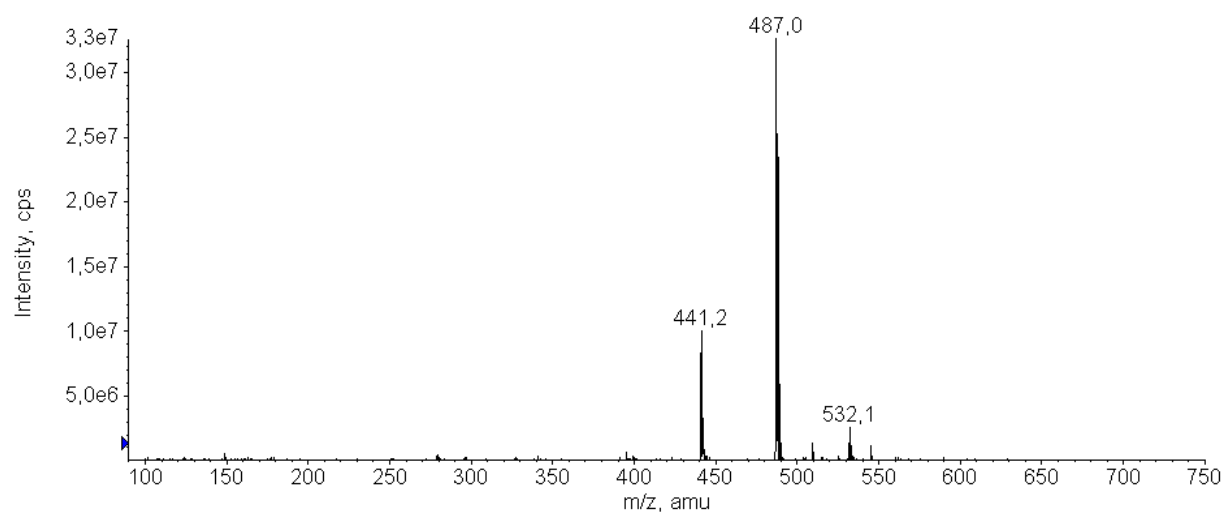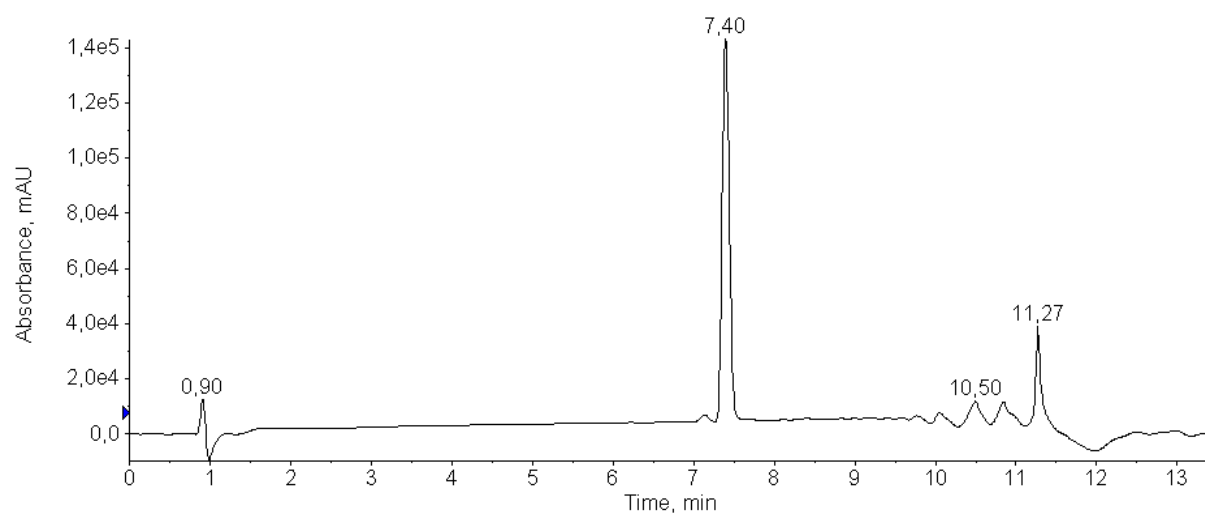

**Supporting Information Figure 38:** LC/MS analysis of **Scaff10-17**. Upper panel: Mass spectrum. Lower panel: according chromatogram.

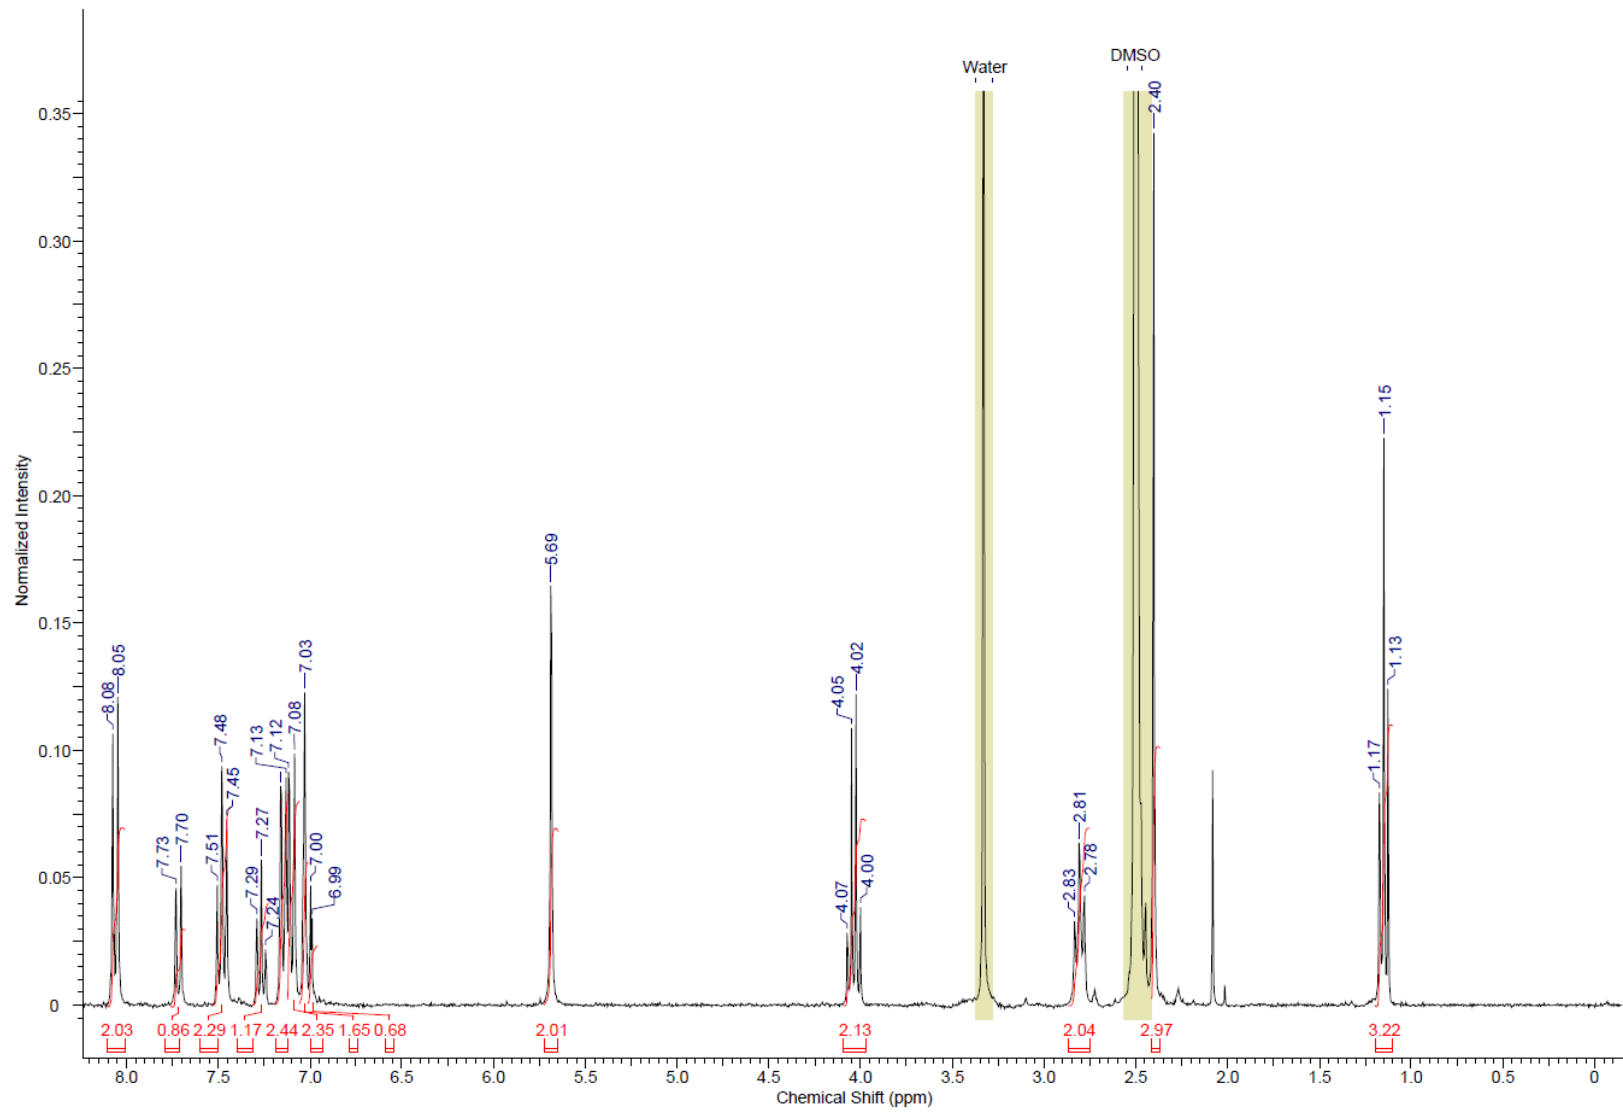

Supporting Information Figure 39:  $^1\text{H}$  NMR spectrum of Scaff10-17, 300 MHz,  $\text{DMSO-d}_6$ .



4.1.22 3-[5-Methyl-3-(2-naphthyl)-7-oxo-furo[3,2-g]chromen-6-yl]propanoic acid (**Scaff10-25**)

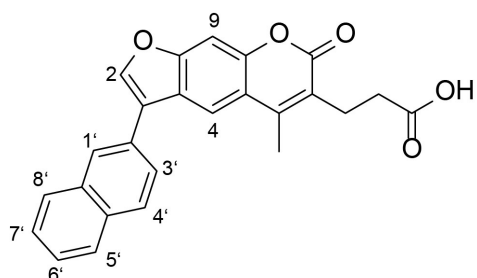

Ethyl 3-(7-hydroxy-4-methyl-2-oxo-chromen-3-yl)propanoate (**5a**) (50 mg, 0.18 mmol) was solved in 6 ml dry acetone and preactivated with potash in excess (249 mg, 1.80 mmol) at 55 °C. The  $\alpha$ -haloketone 2-bromo-1-(2-naphthyl)ethanone (**2e**) was added (164 mg, 0.72 mmol). The mixture was refluxed at the same temperature for 2 h. The product was precipitated using 1 M H<sub>2</sub>SO<sub>4</sub>. The precipitated solid was filtered and purified using preparative HPLC with the following gradient: 30 % to 95 % ACN in H<sub>2</sub>O in 60 min. The product eluted at  $t_R$  = 15 min and was obtained after lyophilisation as yellowish solid in 22 % yield (3 mg).

Due to the pure yield, no <sup>1</sup>H NMR spectrum was obtained.

ESI-MS: cal. 399.12, exp. 399.04 ([M+H]<sup>+</sup>)

HPLC: 95 % purity at 254 nm

$t_R$  (HPLC): 8.9 min;  $\lambda_{max}$  = 257 nm and 308 nm

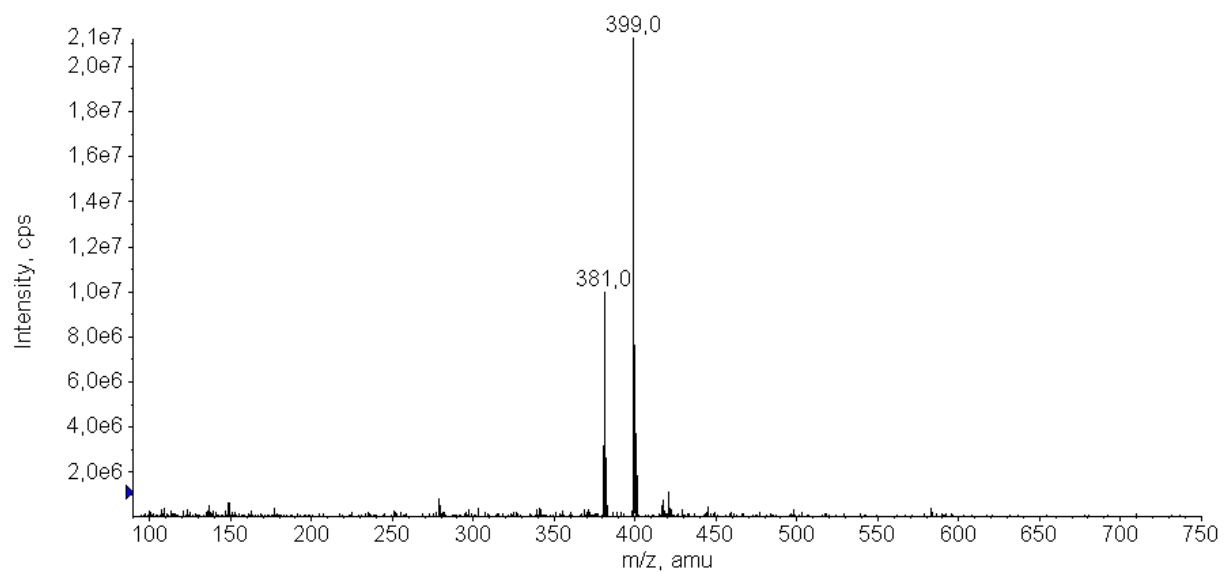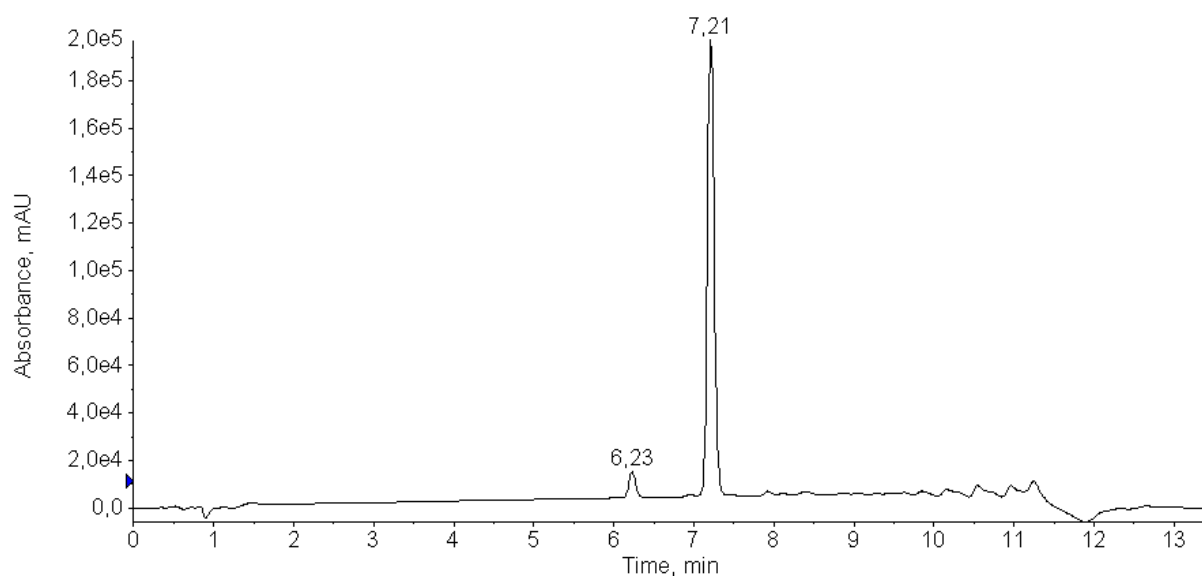

**Supporting Information Figure 40:** LC/MS analysis of **Scaff10-25**. Upper panel: Mass spectrum. Lower panel: according chromatogram.

4.1.23 3-[3-(4-Methoxyphenyl)-5-methyl-7-oxo-furo[3,2-g]chromen-6-yl]-*N,N*-dimethyl-propanamide  
(Scaff10-26)

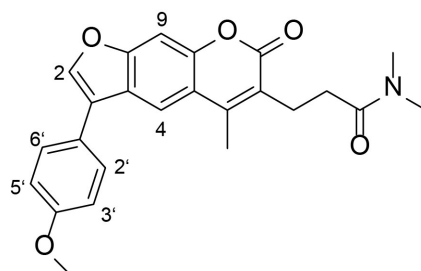

3-[3-(4-Methoxyphenyl)-5-methyl-7-oxo-furo[3,2-g]chromen-6-yl]propanoic acid (Scaff10-8) (11 mg, 0.03 mmol) was condensed with dimethylamine hydrochloride in excess (7.11 mg, 0.09 mmol) catalysed by HATU (16.6 mg, 0.04 mmol) in 1 ml DMF and triethylamine as base (8.83 mg, 0.09 mmol) at 25 °C for 3.5 h. The product was isolated using preparative HPLC with the following gradient: 5 % to 80 % ACN in H<sub>2</sub>O in 90 min. The product eluted at  $t_R = 65$  min and was obtained after lyophilisation as yellow solid in 30 % yield (3.5 mg).

<sup>1</sup>H NMR (300 MHz, DMSO-*d*<sub>6</sub>):  $\delta$ (ppm) = 2.39 - 2.46 (m, 2H, -CH<sub>2</sub>-CH<sub>2</sub>-CON(CH<sub>3</sub>)<sub>2</sub>), 2.53 - 2.58 (s, 3H, Ar-CH<sub>3</sub>), 2.76 - 2.86 (m, 5H, -N-(CH<sub>3</sub>)<sub>2</sub>, -CH<sub>2</sub>-CH<sub>2</sub>-CON(CH<sub>3</sub>)<sub>2</sub>), 2.91 - 2.99 (s, 3H, -N-(CH<sub>3</sub>)<sub>2</sub>), 3.78 - 3.88 (s, 3H, -OCH<sub>3</sub>), 7.06 - 7.16 (d, *J* = 8.55 Hz, 2H, H-3', -5'), 7.70 - 7.79 (d, *J* = 8.54 Hz, 2H, H-2', -6'), 8.10 - 8.17 (s, 1H, H-4), 8.35 - 8.41 (s, 1H, H-2)

ESI-MS: cal. 406.16, exp. 406.08 ([M+H]<sup>+</sup>)

HPLC: 99 % purity at 254 nm

$t_R$  (HPLC): 6.45 min;  $\lambda_{max} = 253$  nm and 308 nm

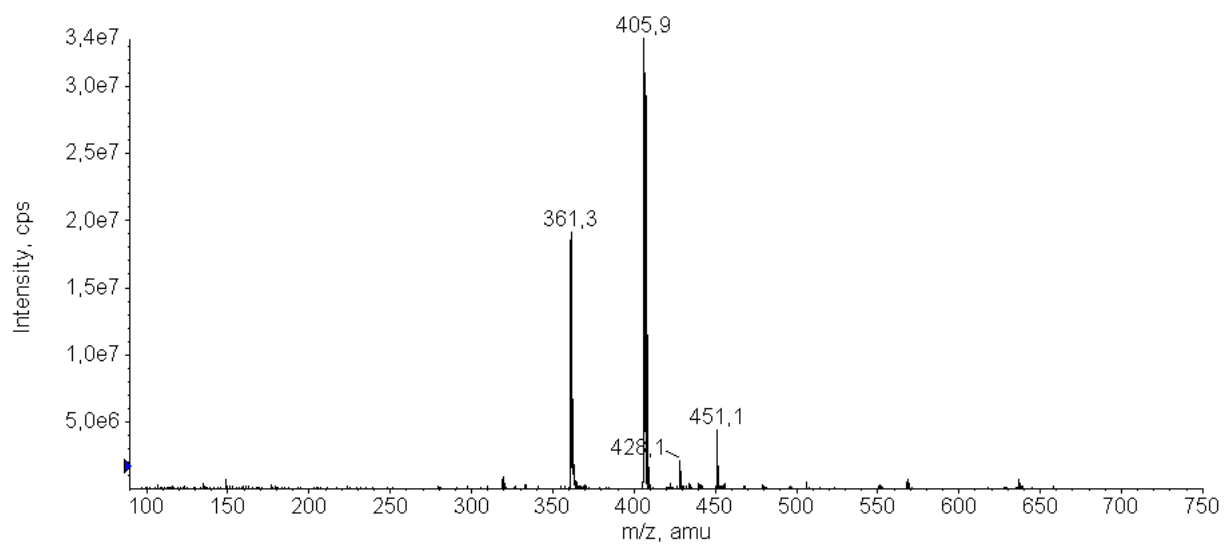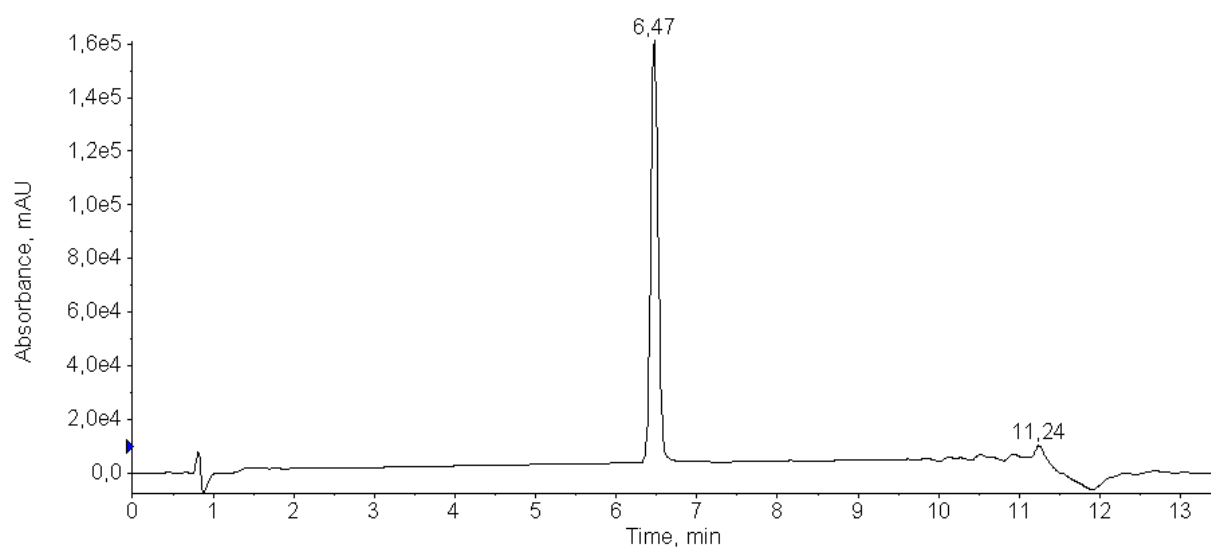

**Supporting Information Figure 41:** LC/MS analysis of **Scaff10-26**. Upper panel: Mass spectrum. Lower panel: according chromatogram.

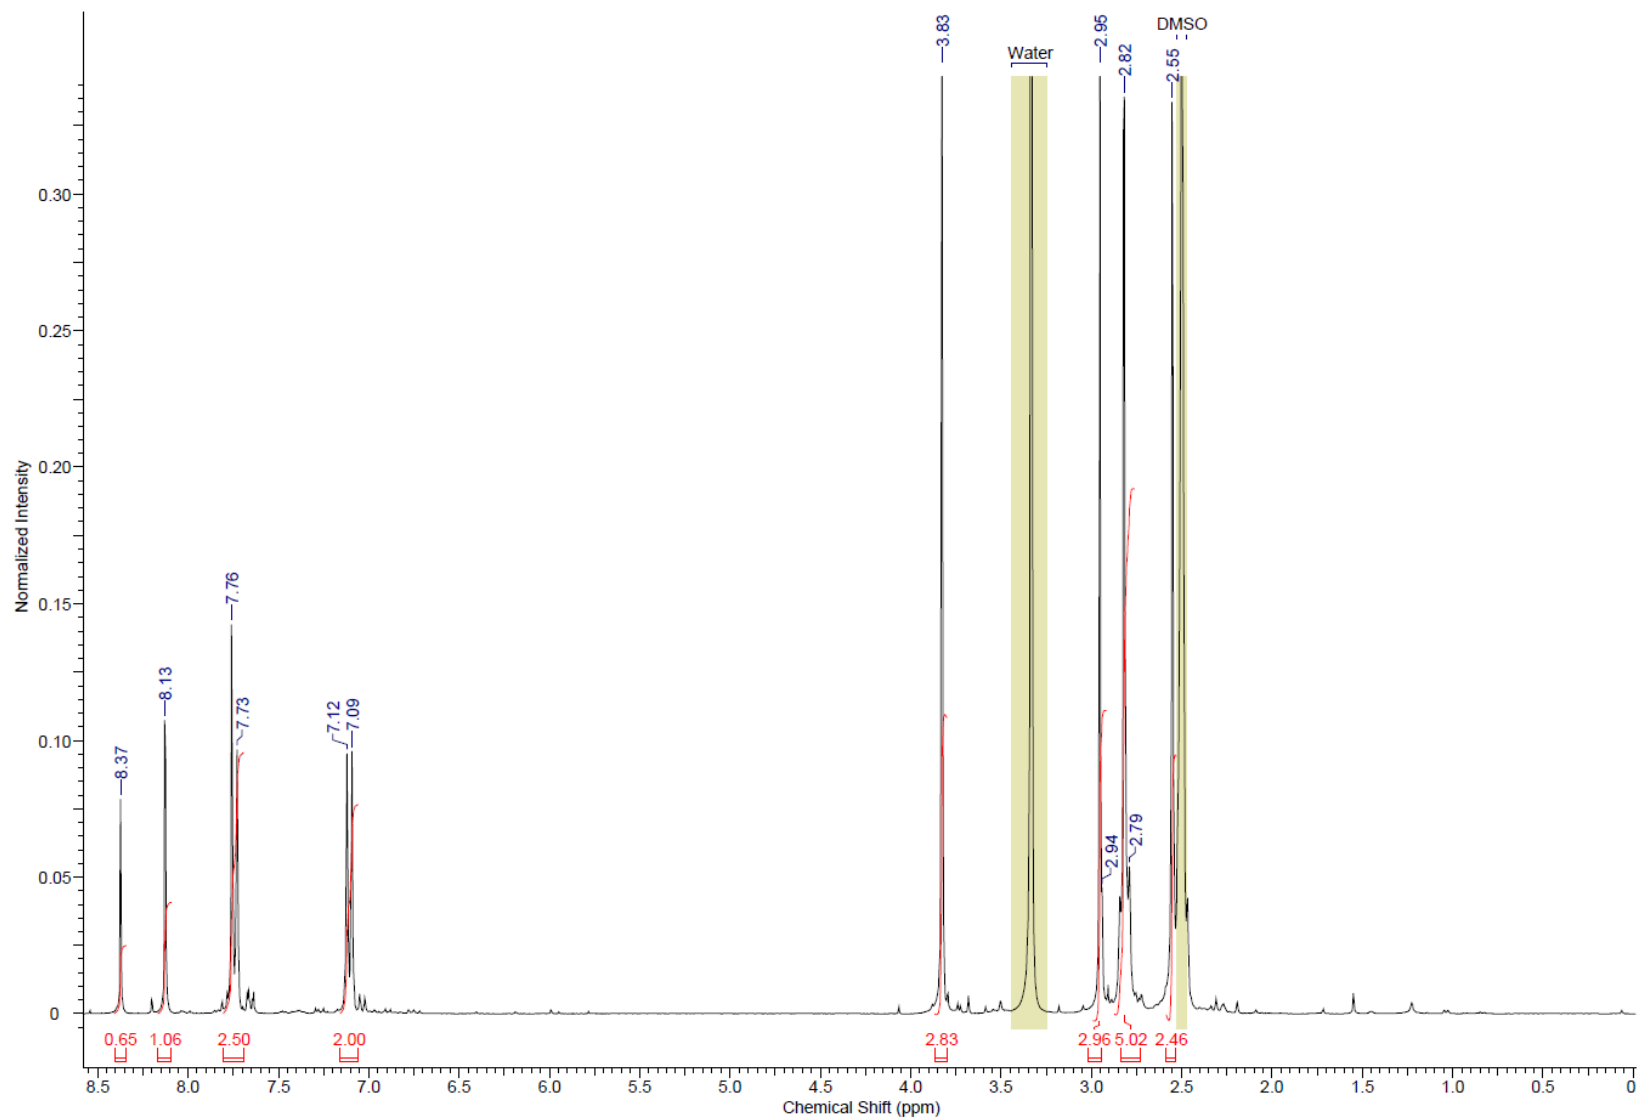

Supporting Information Figure 42: <sup>1</sup>H NMR spectrum of Scaff10-26, 300 MHz, DMSO-d<sub>6</sub>.

4.1.24 3-[3-(4-Methoxyphenyl)-5-methyl-7-oxo-furo[3,2-g]chromen-6-yl]-*N*-(3-pyridyl)propanamide (**Scaff10-27**)

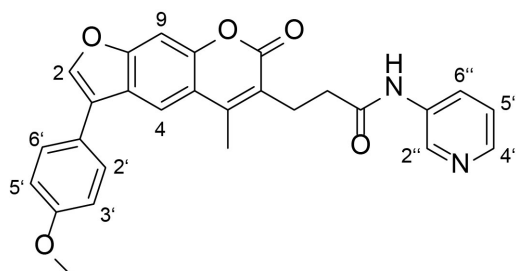

3-[3-(4-Methoxyphenyl)-5-methyl-7-oxo-furo[3,2-g]chromen-6-yl]propanoic acid (**Scaff10-8**) (11 mg, 0.03 mmol) was condensed with 3-aminopyridine in excess (4.1 mg, 0.044 mmol) catalysed by HATU (16.6 mg, 0.04 mmol) in 1 ml DMF and triethylamine as base (8.83 mg, 0.09 mmol) at 25 °C for 3.5 h. The product was isolated using preparative HPLC with the following gradient: 5 % to 80 % ACN in H<sub>2</sub>O in 90 min. The product eluted at  $t_R = 67$  min and was obtained after lyophilisation as light yellow solid in 48 % yield (6.4 mg).

<sup>1</sup>H NMR (300 MHz, DMSO-*d*<sub>6</sub>):  $\delta$ (ppm) = 2.40 – 2.47 (s, 3H, Ar-CH<sub>3</sub>), 2.51 – 2.63 (t,  $J = 7.32$  Hz, 2H, -CH<sub>2</sub>-CH<sub>2</sub>-CONH-), 2.81 – 2.97 (t,  $J = 7.32$  Hz, 2H, -CH<sub>2</sub>-CH<sub>2</sub>-CONH-), 3.74 – 3.85 (s, 3H, -OCH<sub>3</sub>), 7.00 – 7.10 (d,  $J = 8.55$  Hz, 2H, H-3', -5'), 7.20 – 7.32 (m, 1H, H-5''), 7.63 – 7.69 (m, 2H, H-2', -6'), 8.02 – 8.08 (s, 1H, H-4), 8.14 – 8.20 (m, 1H, H-6''), 8.29 – 8.34 (s, 1H, H-2), 8.61 – 8.64 (m, 1H, H-4''), 10.10 – 10.17 (s, 1H, NH)

ESI-MS: cal. 455.16, exp. 455.04 ([M+H]<sup>+</sup>)

HPLC: 99 % purity at 254 nm

$t_R$  (HPLC): 5.11 min;  $\lambda_{max} = 249$  nm and 308 nm

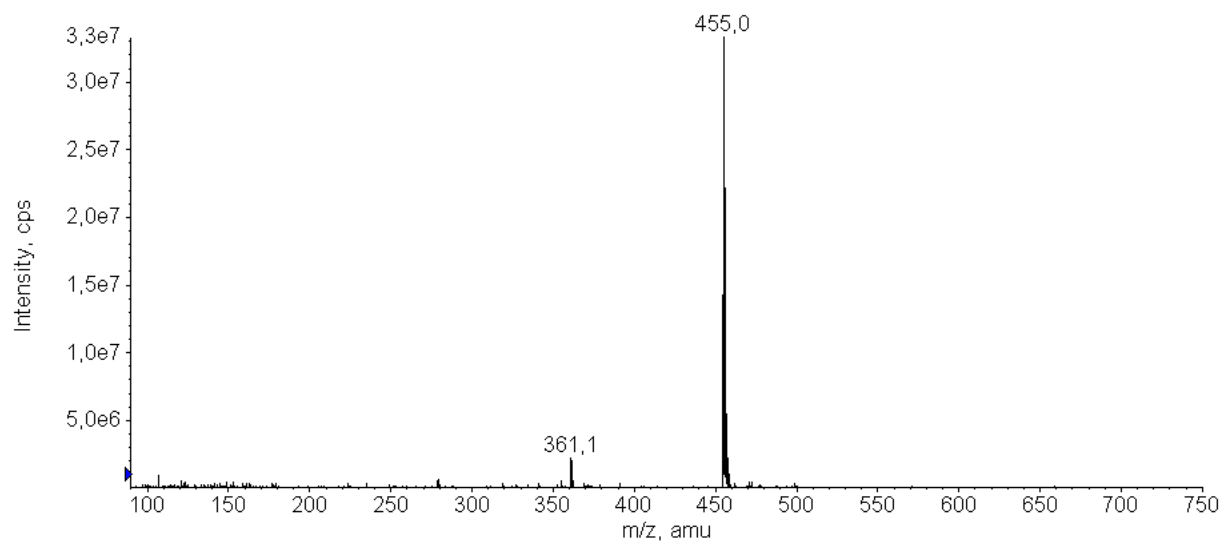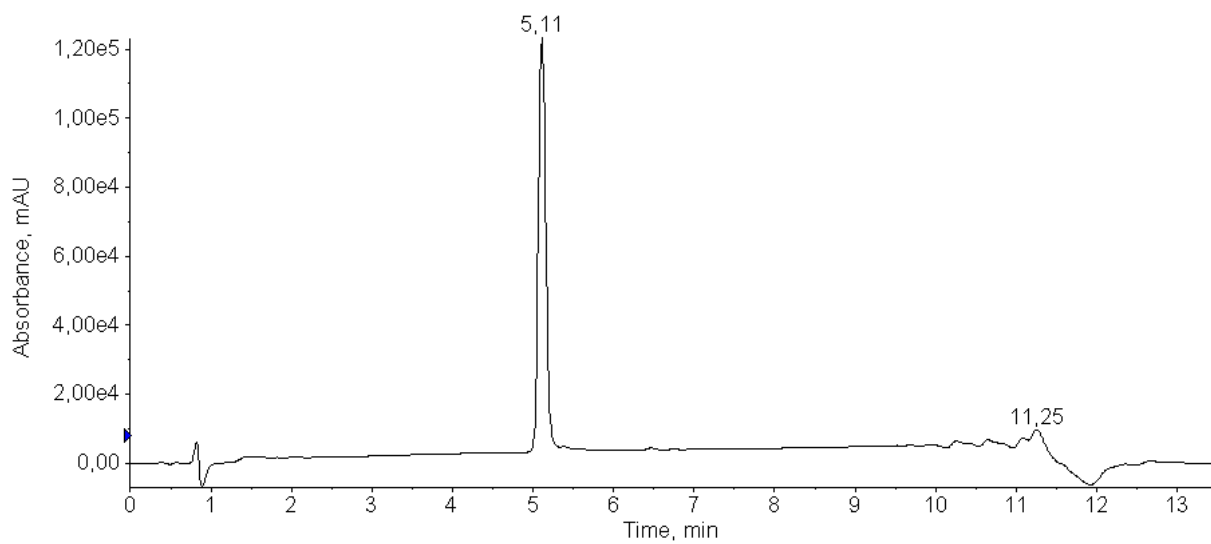

**Supporting Information Figure 43:** LC/MS analysis of **Scaff10-27**. Upper panel: Mass spectrum. Lower panel: according chromatogram.

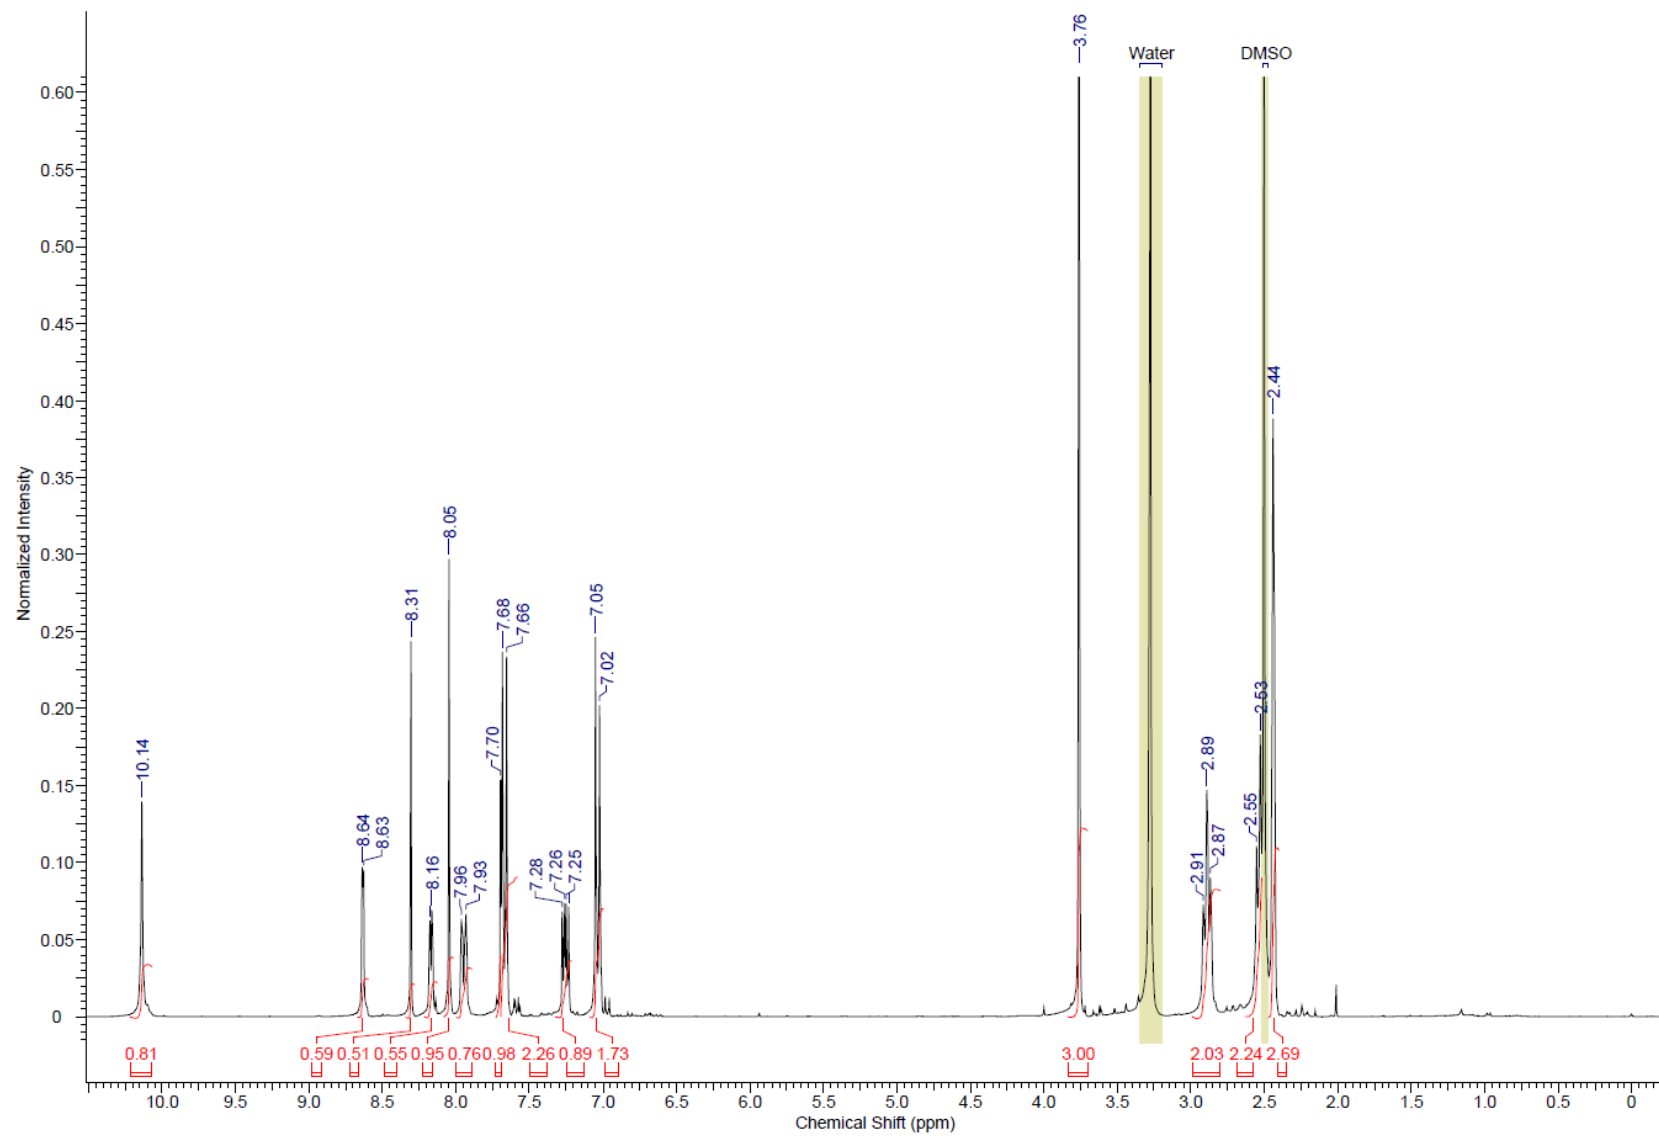

Supporting Information Figure 44: <sup>1</sup>H NMR spectrum of Scaff10-27, 300 MHz, DMSO-d<sub>6</sub>.



4.1.25 Ethyl 3-[4-methyl-2-oxo-7-[2-oxo-2-[4-(trifluoromethyl)phenyl]ethoxy]chromen-3-yl]propanoate  
(**Scaff10-28**)

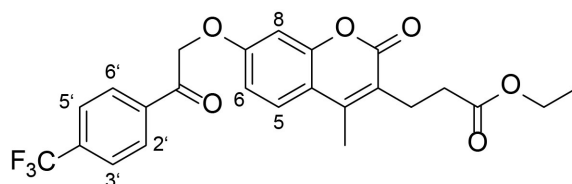

Ethyl 3-(7-hydroxy-4-methyl-2-oxo-chromen-3-yl)propanoate (**5a**) (200 mg, 0.72 mmol) was solved in 15 ml dry acetone and preactivated with potash in excess (249 mg, 1.80 mmol) at 55 °C. The  $\alpha$ -haloketone 2-bromo-1-(4-trifluoromethylphenyl)ethanone (**2i**) was added (164 mg, 0.72 mmol). The mixture was refluxed at the same temperature for 2 h. Ethyl 3-(7-(2-(4-methoxyphenyl)-2-oxoethoxy)-4-methyl-2-oxo-chromen-3-yl)propanoate (**Scaff10-28**) was precipitated using 1 M H<sub>2</sub>SO<sub>4</sub> and purified using preparative HPLC with the following gradient: 40 % to 95 % ACN in H<sub>2</sub>O in 80 min. The product eluted at  $t_R$  = 48 min and was obtained after lyophilisation as ivory white solid in 5 % yield (16 mg).

<sup>1</sup>H NMR (300 MHz, DMSO-d<sub>6</sub>):  $\delta$ (ppm) = 1.09 – 1.22 (t, J = 7.32 Hz, 3H, -CH<sub>2</sub>-CH<sub>3</sub>), 2.38 – 2.43 (s, 3H, Ar-CH<sub>3</sub>), 2.44 – 2.49 (t, J = 8.54 Hz, 2H, -CH<sub>2</sub>-CH<sub>2</sub>-COOEt), 2.76 – 2.86 (t, J = 8.54 Hz, 2H, -CH<sub>2</sub>-CH<sub>2</sub>-COOEt), 3.98 – 4.09 (q, J = 7.32 Hz, 2H, -CH<sub>2</sub>-CH<sub>3</sub>), 5.76 – 5.82 (s, 2H, -CO-CH<sub>2</sub>-OAr), 7.00 – 7.08 (d, J = 8.54 Hz, 1H, H-6), 7.10 – 7.13 (s, 1H, H-8), 7.69 – 7.76 (d, J = 8.55 Hz, 1H, H-5), 7.93 – 8.01 (d, J = 7.32 Hz, 2H, H-2', -6'), 8.19 – 8.26 (d, J = 8.54 Hz, 2H, H-3', -5')

ESI-MS: cal. 463.13, exp. 463.1 ([M+H]<sup>+</sup>)

HPLC: 97 % purity at 254 nm

$t_R$  (HPLC): 7.48 min;  $\lambda_{max}$  = 290 nm and 319 nm

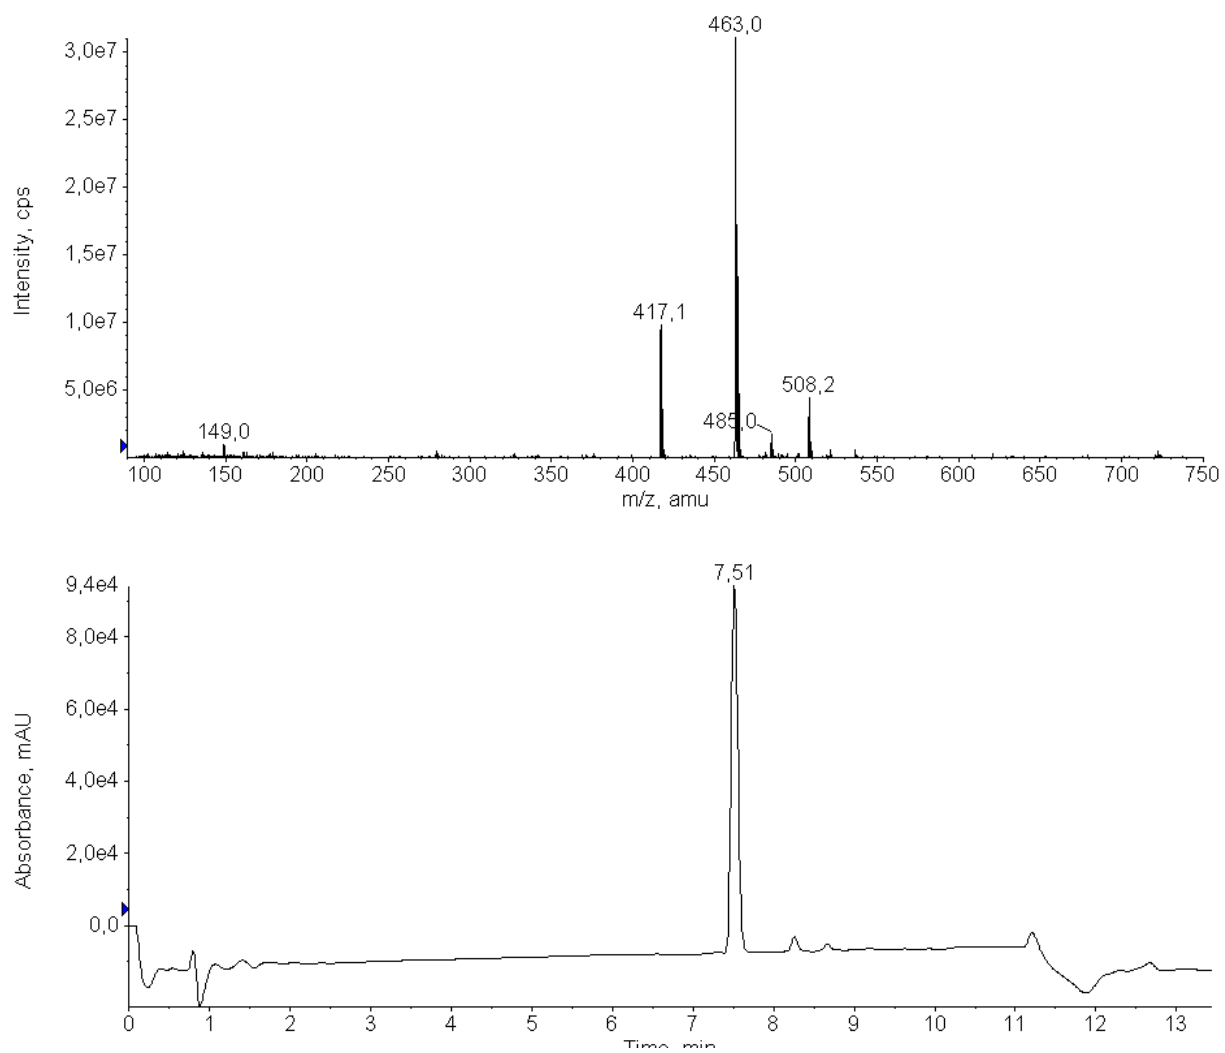

**Supporting Information Figure 45:** LC/MS analysis of **Scaff10-28**. Upper panel: Mass spectrum. Lower panel: according chromatogram.

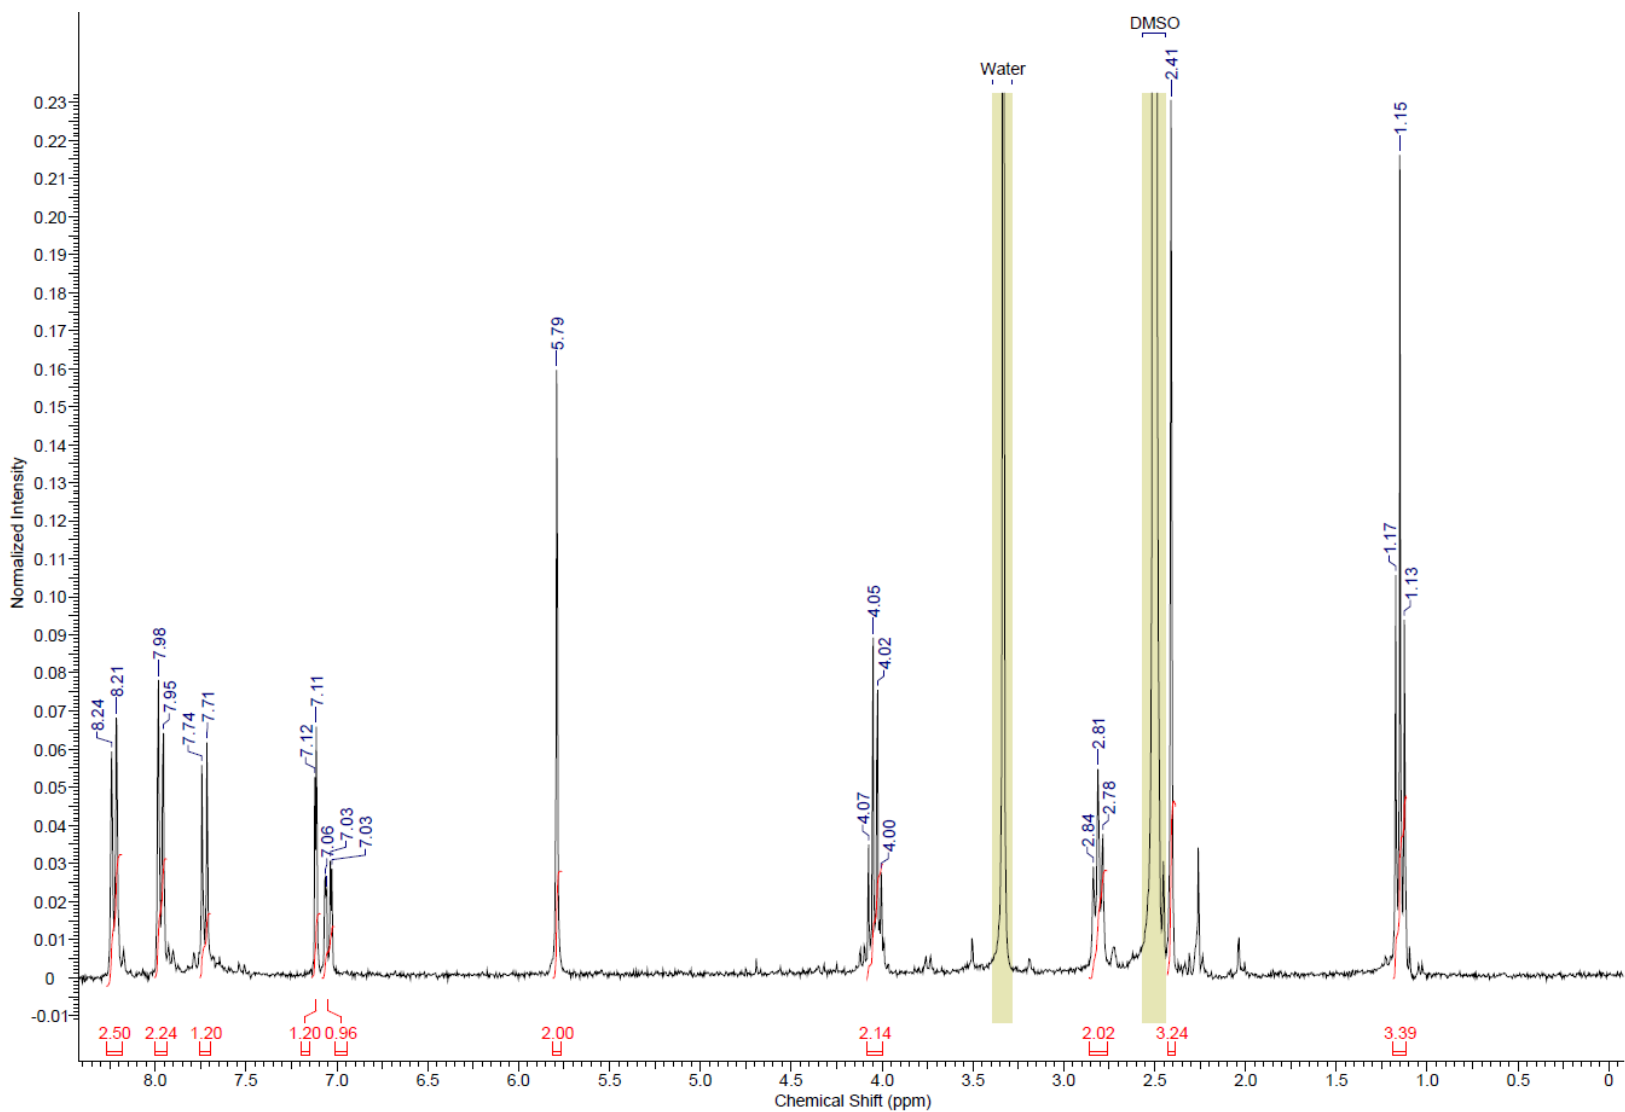

Supporting Information Figure 46:  $^1\text{H}$  NMR spectrum of Scaff10-28, 300 MHz,  $\text{DMSO-d}_6$ .

4.1.26 3-[4-Methyl-2-oxo-7-[2-oxo-2-[4-(trifluoromethyl)phenyl]ethoxy]chromen-3-yl]propanoic acid  
(Scaff10-29)

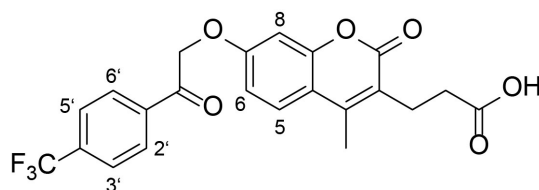

Ethyl 3-[4-methyl-2-oxo-7-[2-oxo-2-[4-(trifluoromethyl)phenyl]ethoxy]chromen-3-yl]propanoate (**Scaff10-28**) (45 mg, 0.10 mmol) was saponificated in a mixture of 2 ml ACN and 1 ml 1 M sodium hydroxide at 70 °C for 1 h. After concentration of the product through removal of solvent under reduced pressure, the product was purified using preparative HPLC with the following gradient: 10 % to 90 % ACN in H<sub>2</sub>O in 80 min. The product eluted at  $t_R = 27$  min and was obtained after lyophilisation as yellowish solid in 18 % yield (8 mg).

<sup>1</sup>H NMR (300 MHz, DMSO-d<sub>6</sub>):  $\delta$ (ppm) = 1.88 – 2.02 (t, J = 7.32 Hz, 2H, -CH<sub>2</sub>-CH<sub>2</sub>-COOH), 2.36 – 2.44 (s, 3H, Ar-CH<sub>3</sub>), 2.63 – 2.72 (t, J = 7.32 Hz, 2H, -CH<sub>2</sub>-CH<sub>2</sub>-COOH), 5.73 – 5.81 (s, 2H, -CO-CH<sub>2</sub>-OAr), 6.98 – 7.05 (dd, J = 2.44 Hz, 8.55 Hz, 1H, H-6), 7.06 – 7.10 (d, J = 2.44 Hz, 1H, H-8), 7.65 – 7.71 (d, J = 8.54 Hz, 1H, H-5), 7.93 – 8.00 (d, J = 8.54 Hz, 2H, H-3', -5'), 8.20 – 8.27 (d, J = 8.54 Hz, 2H, H-2', -6')

ESI-MS: cal. 435.10, exp. 435.1 ([M+H]<sup>+</sup>)

HPLC: 98 % purity at 254 nm

$t_R$  (HPLC): 6.29 min;  $\lambda_{max} = 289$  nm and 320 nm

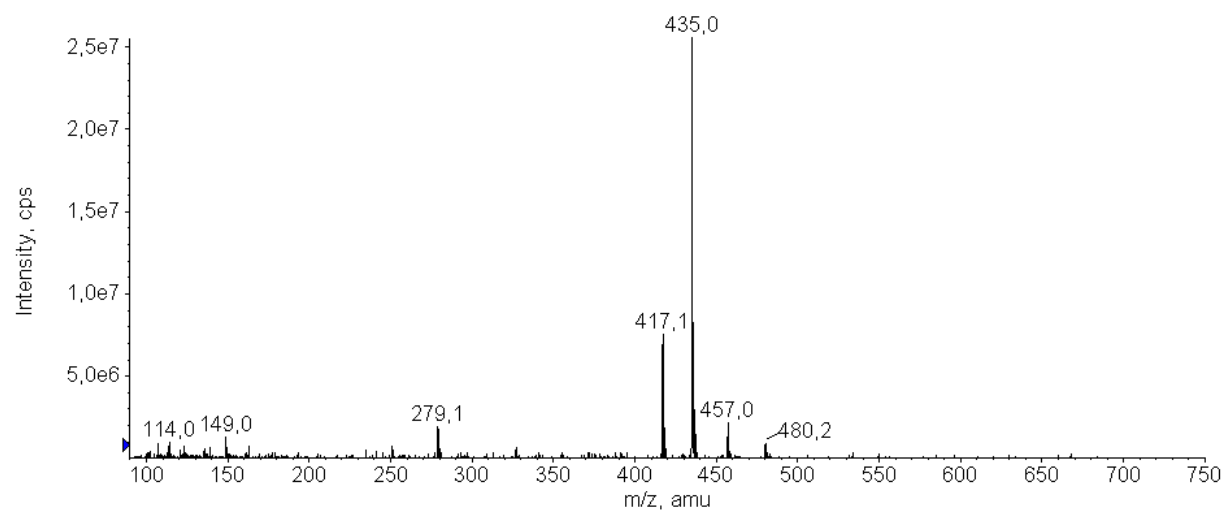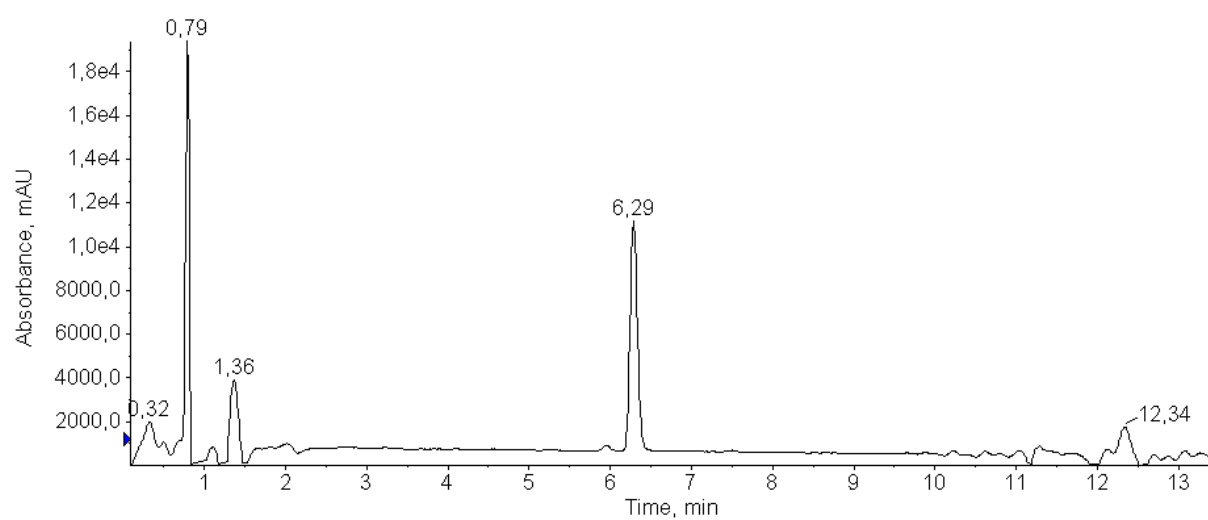

**Supporting Information Figure 47:** LC/MS analysis of **Scaff10-29**. Upper panel: Mass spectrum. Lower panel: according chromatogram.

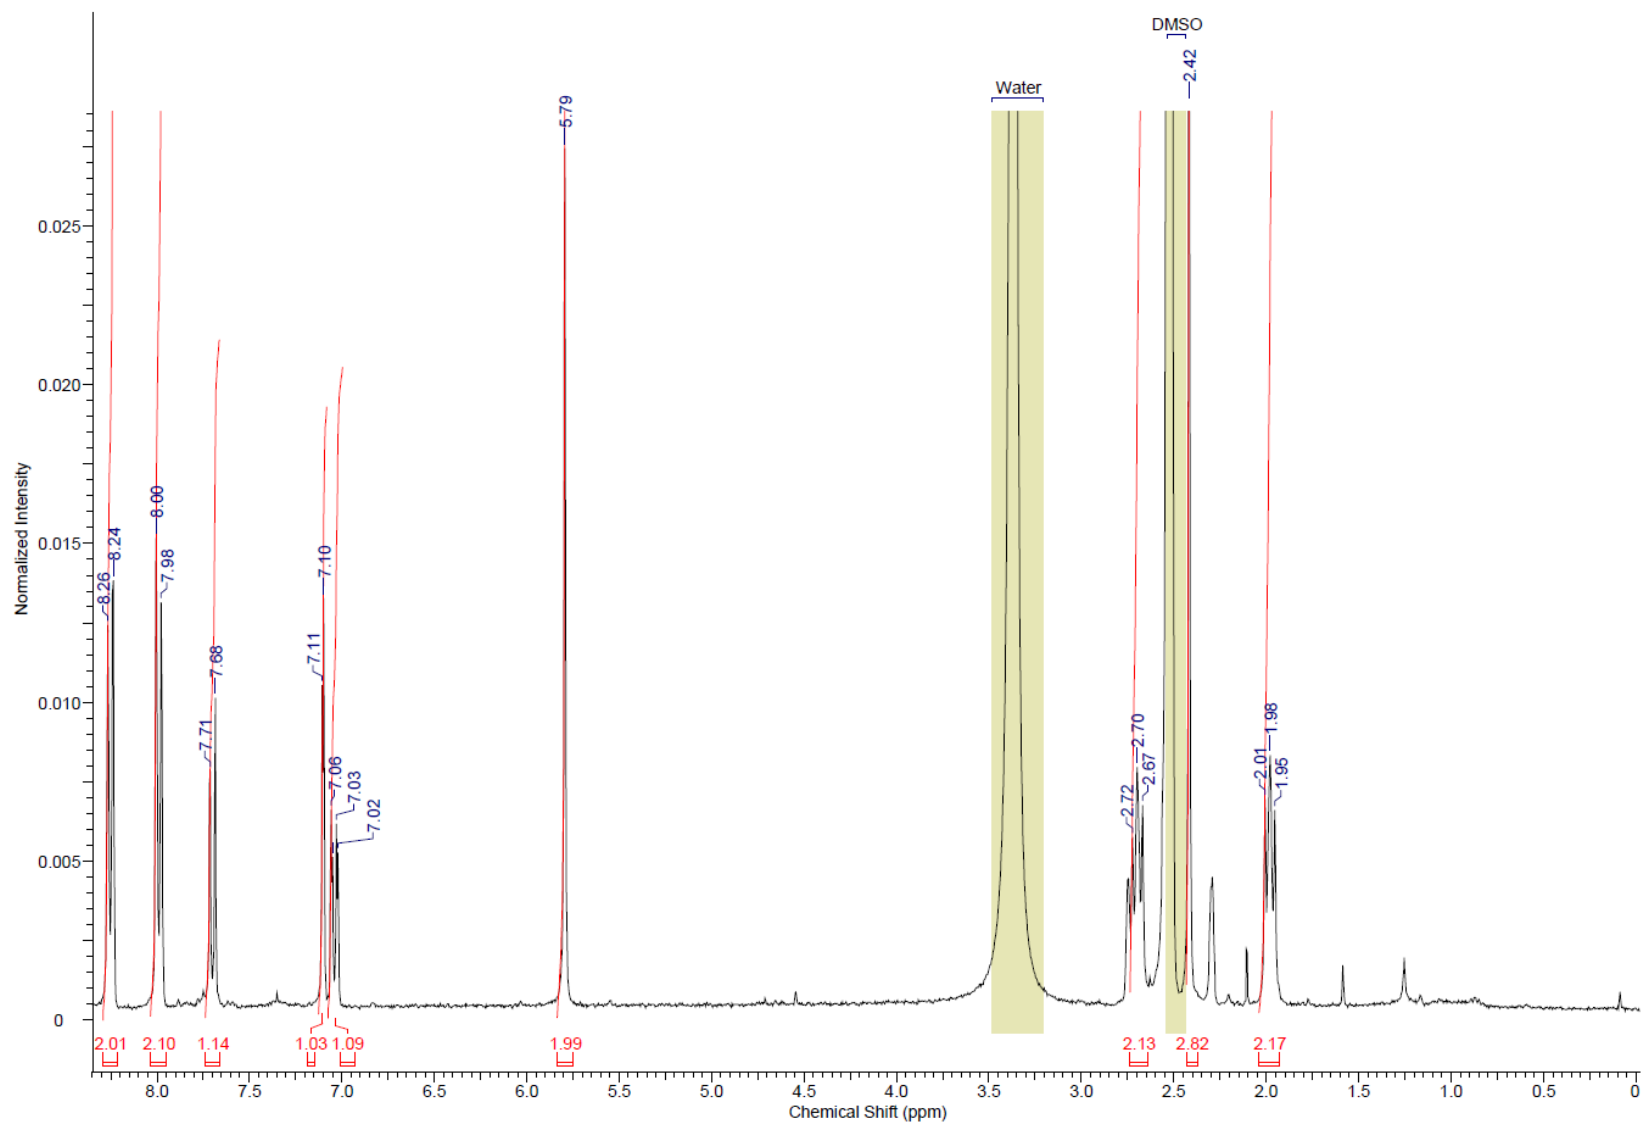

Supporting Information Figure 48:  $^1\text{H}$  NMR spectrum of Scaff10-29, 300 MHz,  $\text{DMSO-d}_6$ .

4.1.27 3-[5-Methyl-7-oxo-3-[4-(trifluoromethyl)phenyl]furo[3,2-g]chromen-6-yl]propanoic acid (**Scaff10-30**)

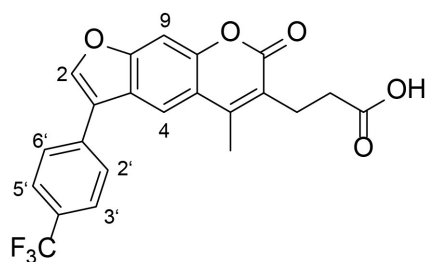

Ethyl 3-[4-methyl-2-oxo-7-[2-oxo-2-[4-(trifluoromethyl)phenyl]ethoxy]chromen-3-yl]propanoate (**Scaff10-28**) (95 mg, 0.21 mmol) was saponificated in a mixture of 3 ml dry acetone and 3 ml 1 M sodium hydroxide at 80 °C for 3.25 h. Dropwise addition of 1 M HCl resulted in precipitation of the product. The precipitated solid was filtered and purified using preparative HPLC with the following gradient: 5 % to 95 % ACN in H<sub>2</sub>O in 80 min. The product eluted at  $t_R = 11.5$  min and was obtained after lyophilisation as yellowish solid in 6 % yield (5 mg).

Due to the pure yield, no <sup>1</sup>H NMR spectrum was obtained.

ESI-MS: cal. 417.01, exp. 417.0 ([M+H]<sup>+</sup>)

HPLC: 95 % purity at 254 nm

$t_R$  (HPLC): 7.02 min;  $\lambda_{max} = 294$  nm and 328 nm

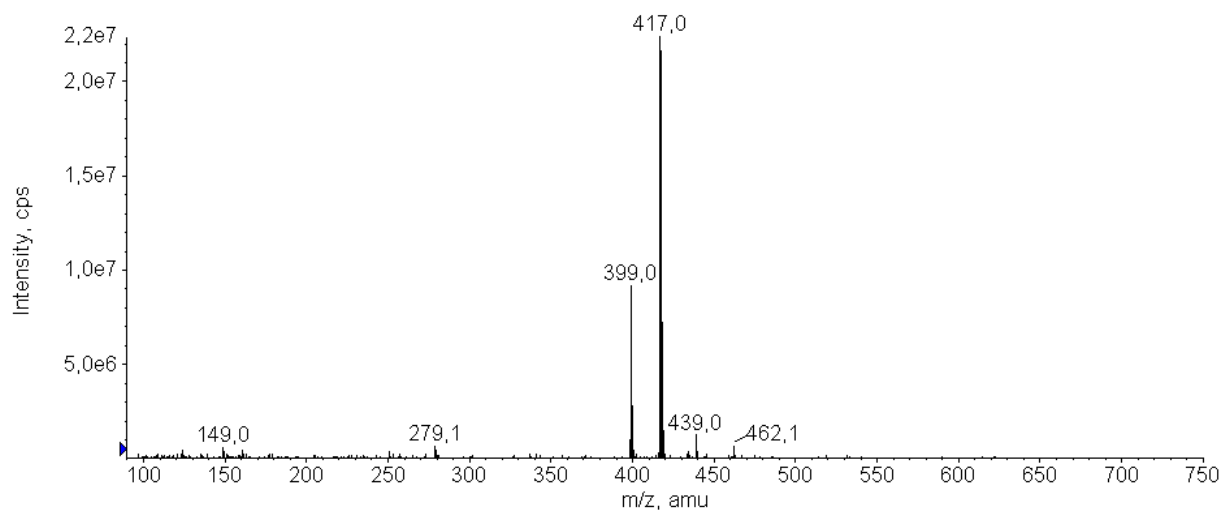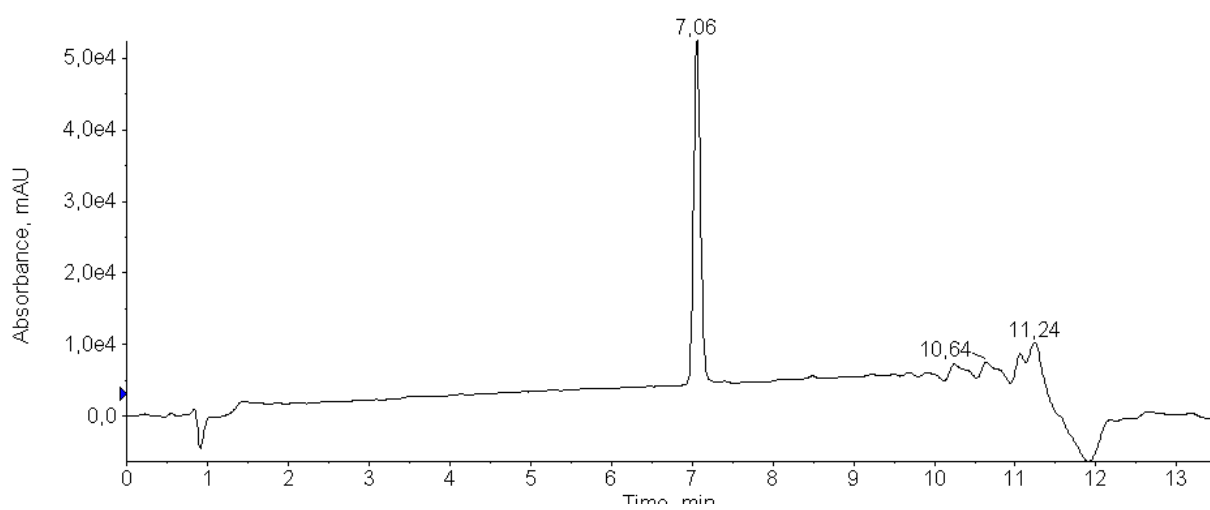

**Supporting Information Figure 49:** LC/MS analysis of **Scaff10-30**. Upper panel: Mass spectrum. Lower panel: according chromatogram.



4.1.28 Ethyl 3-[4-methyl-2-oxo-7-[2-oxo-2-(4-pyridyl)ethoxy]chromen-3-yl]propanoate (**Scaff10-31**)

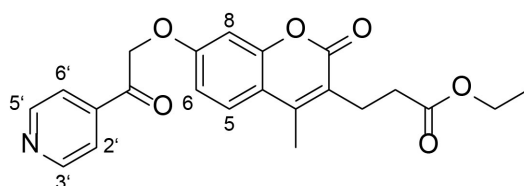

Ethyl 3-(7-hydroxy-4-methyl-2-oxo-chromen-3-yl)propanoate (**5a**) (100 mg, 0.36 mmol) was solved in 0.5 ml DMF and preactivated with potash in excess (2125 mg, 0.91 mmol) at 55 °C. The  $\alpha$ -haloketone 2-bromo-1-(4-pyridyl)ethanone (**2j**) was added (79 mg, 0.40 mmol). The final product after purification gave an orange-yellowish solid.

$^1\text{H}$  NMR (300 MHz, DMSO- $d_6$ ):  $\delta$ (ppm) = 1.10 – 1.12 (t,  $J$  = 7.32 Hz, 3H,  $-\text{CH}_2-\text{CH}_3$ ), 2.38 – 2.45 (s, 3H, Ar- $\text{CH}_3$ ), 2.47 – 2.53 (t,  $J$  = 8.54 Hz, 2H,  $-\text{CH}_2-\text{CH}_2-\text{COOEt}$ ), 2.77 – 2.89 (t,  $J$  = 8.54 Hz, 2H,  $-\text{CH}_2-\text{CH}_2-\text{COOEt}$ ), 3.99 – 4.11 (q,  $J$  = 7.32 Hz, 2H,  $-\text{CH}_2-\text{CH}_3$ ), 5.72 – 5.84 (s, 2H,  $-\text{CO}-\text{CH}_2-\text{OAr}$ ), 7.04 – 7.11 (dd,  $J$  = 2.44 Hz, 9.77 Hz, 1H, H-6), 7.13 – 7.17 (d,  $J$  = 2.44 Hz, 1H, H-8), 7.72 – 7.78 (d,  $J$  = 8.54 Hz, 1H, H-5), 7.89 – 7.95 (d,  $J$  = 6.10 Hz, 2H, H-2', -6'), 8.86 – 8.92 (d,  $J$  = 6.10 Hz, 2H, H-3', -5')

ESI-MS: cal. 396.14, exp. 396.2 ( $[\text{M}+\text{H}]^+$ )

HPLC: 95 % purity at 254 nm

$t_{\text{R}}$  (HPLC): 5.39 min;  $\lambda_{\text{max}}$  = 286 nm and 318 nm

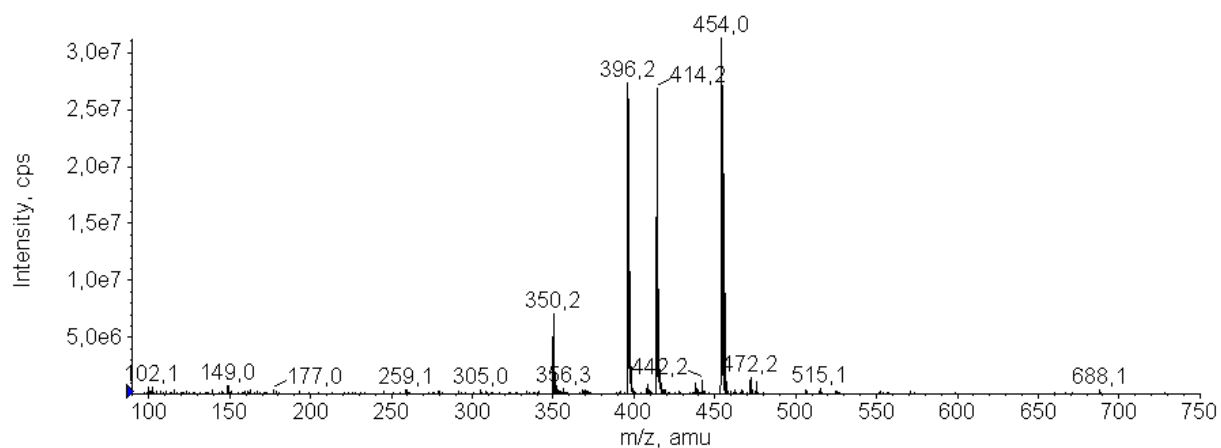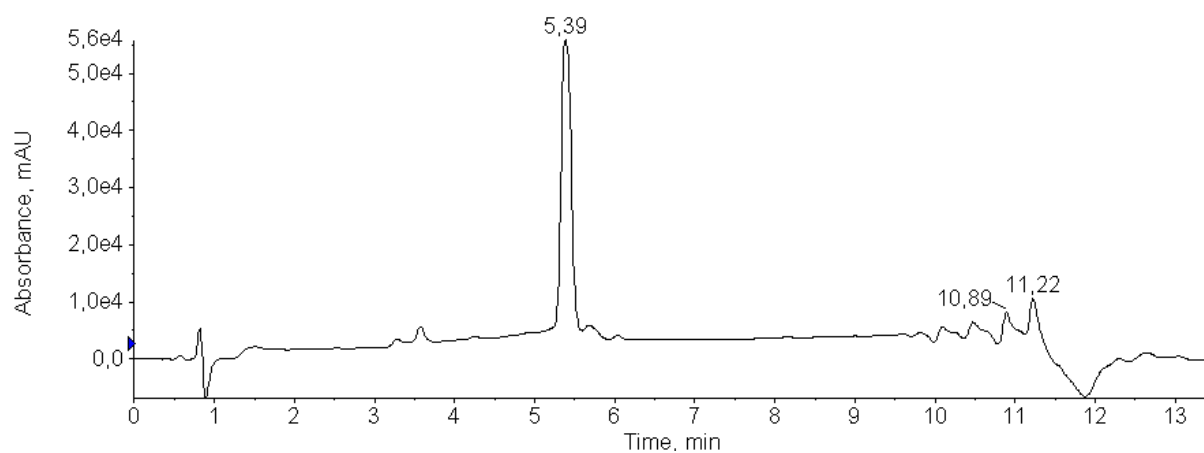

**Supporting Information Figure 50:** LC/MS analysis of **Scaff10-31**. Upper panel: Mass spectrum. Lower panel: according chromatogram.

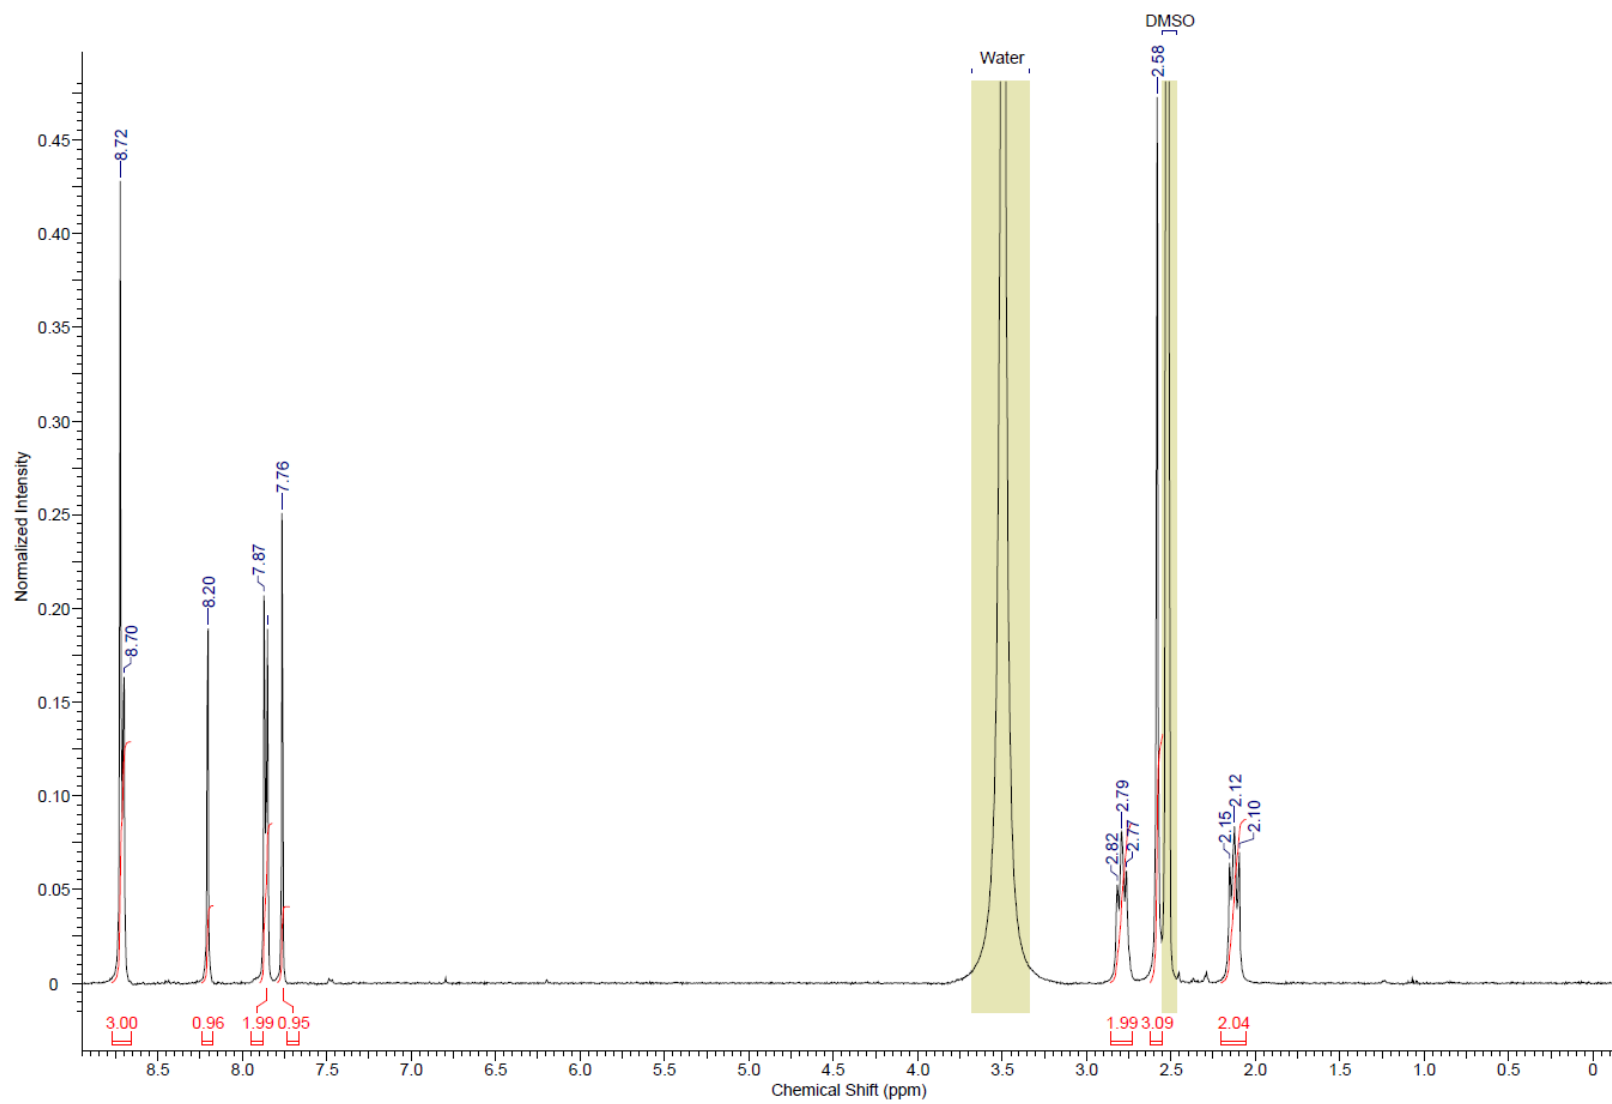

Supporting Information Figure 51: <sup>1</sup>H NMR spectrum of **Scaff10-31**, 300 MHz, DMSO-d<sub>6</sub>.

4.1.29 3-[5-Methyl-7-oxo-3-(4-pyridyl)furo[3,2-g]chromen-6-yl]propanoic acid (**Scaff10-32**)

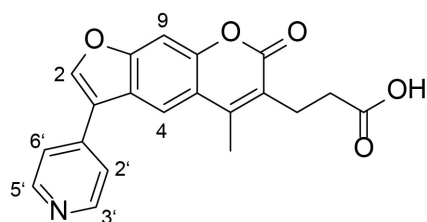

Ethyl 3-[4-methyl-2-oxo-7-[2-oxo-2-(4-pyridyl)ethoxy]chromen-3-yl]propanoate (**Scaff10-31**) (15 mg, 0.04 mmol) was saponificated 1 M sodium hydroxide at 80 °C. The final product after purification gave a bright yellow solid in 31 % yield (4 mg).

Due to the pure yield, no  $^1\text{H}$  NMR spectrum was obtained.

ESI-MS: cal. 350.10, exp. 350.0 ( $[\text{M}+\text{H}]^+$ )

HPLC: 98 % purity at 254 nm

$t_{\text{R}}$  (HPLC): 3.05 min;  $\lambda_{\text{max}}$  = 241 nm and 322 nm

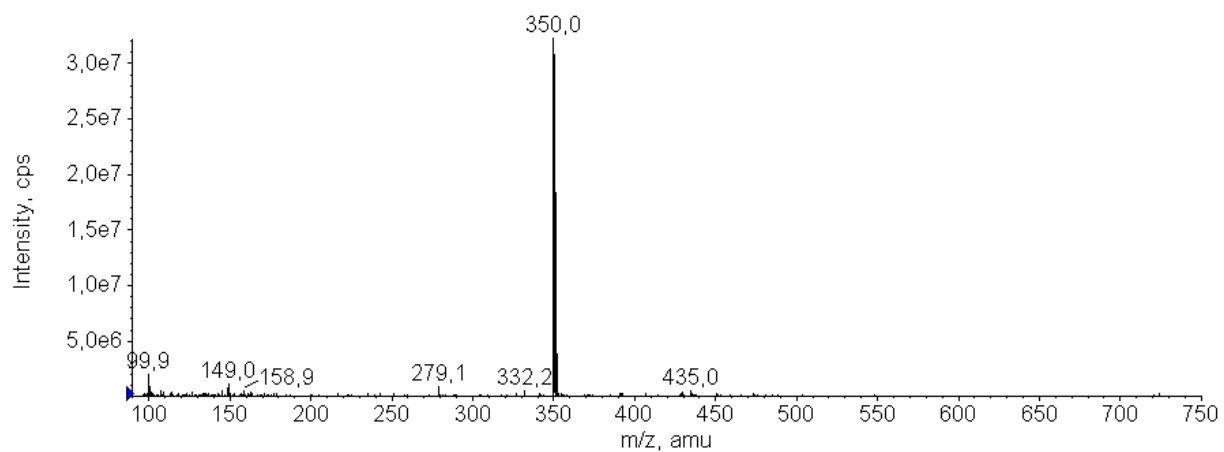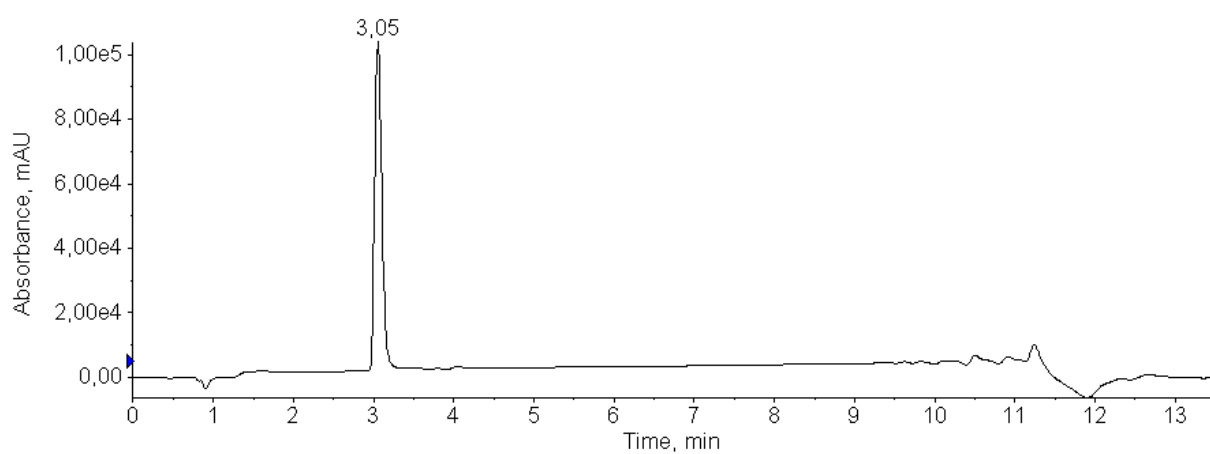

**Supporting Information Figure 52:** LC/MS analysis of **Scaff10-32**. Upper panel: Mass spectrum. Lower panel: according chromatogram.

4.1.30 Ethyl 3-[7-[2-[4-(dimethylamino)phenyl]-2-oxo-ethoxy]-4-methyl-2-oxo-chromen-3-yl]propanoate  
(Scaff10-34)

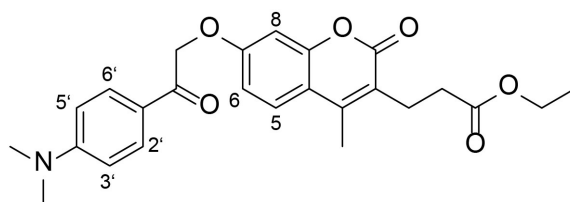

Ethyl 3-(7-hydroxy-4-methyl-2-oxo-chromen-3-yl)propanoate (**5a**) (95 mg, 0.34 mmol) was solved in 5 ml dry acetone and preactivated with potash in excess (124 mg, 0.90 mmol) at 55 °C. The  $\alpha$ -haloketone 2-bromo-1-(4-(dimethylamino)phenyl)ethanone (**2k**) was added (88 mg, 0.36 mmol). The mixture was refluxed at the same temperature for 16 h. The product was precipitated using 1 M H<sub>2</sub>SO<sub>4</sub> and recrystallised in ethanol. The final product gave an ivory white solid in 40 % yield (60 mg).

<sup>1</sup>H NMR (300 MHz, DMSO-d<sub>6</sub>):  $\delta$ (ppm) = 1.11 – 1.26 (t, J = 7.32 Hz, 3H, -CH<sub>2</sub>-CH<sub>3</sub>), 2.37 – 2.46 (s, 3H, Ar-CH<sub>3</sub>), 2.44 – 2.52 (t, J = 8.54 Hz, 2H, -CH<sub>2</sub>-CH<sub>2</sub>-COOEt), 2.76 – 2.90 (t, J = 8.54 Hz, 2H, -CH<sub>2</sub>-CH<sub>2</sub>-COOEt), 2.97 – 3.18 (s, 6H, -N(CH<sub>3</sub>)<sub>2</sub>), 4.00 – 4.15 (q, J = 7.32 Hz, 2H, -CH<sub>2</sub>-CH<sub>3</sub>), 5.52 – 5.65 (s, 2H, -CO-CH<sub>2</sub>-OAr), 6.72 – 6.85 (d, J = 8.54 Hz, 2H, H-3', -5'), 6.94 – 7.06 (m, 2H, H-8, -6), 7.68 – 7.78 (d, J = 9.77 Hz, 1H, H-5), 7.83 – 7.94 (d, J = 8.54 Hz, 2H, H-2', -6')

ESI-MS: cal. 438.19, exp. 438.1 ([M+H]<sup>+</sup>)

HPLC: 98 % purity at 254 nm

t<sub>R</sub> (HPLC): 6.85 min;  $\lambda_{\max}$  = 343 nm

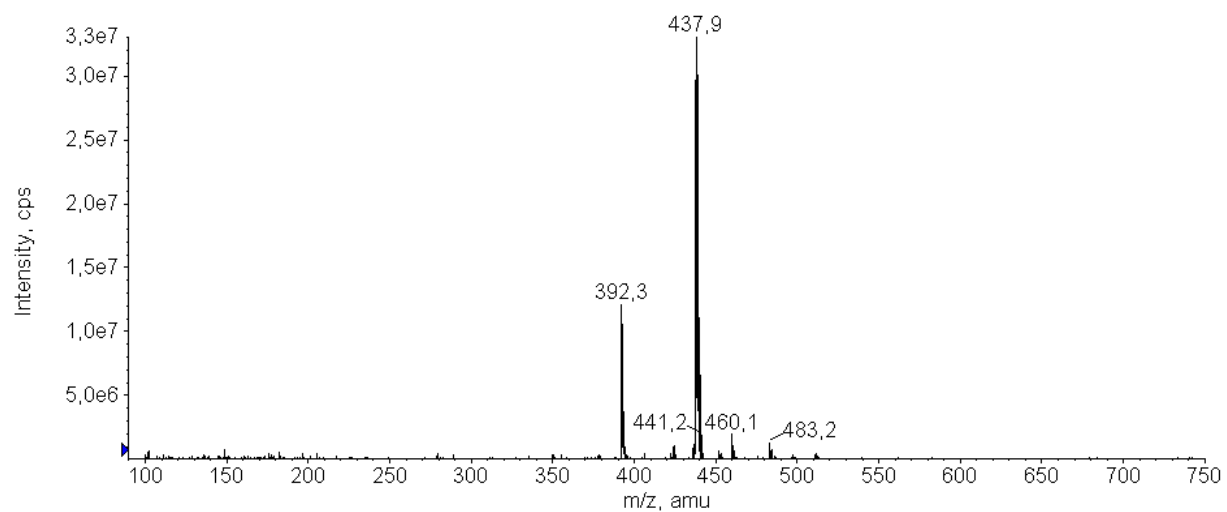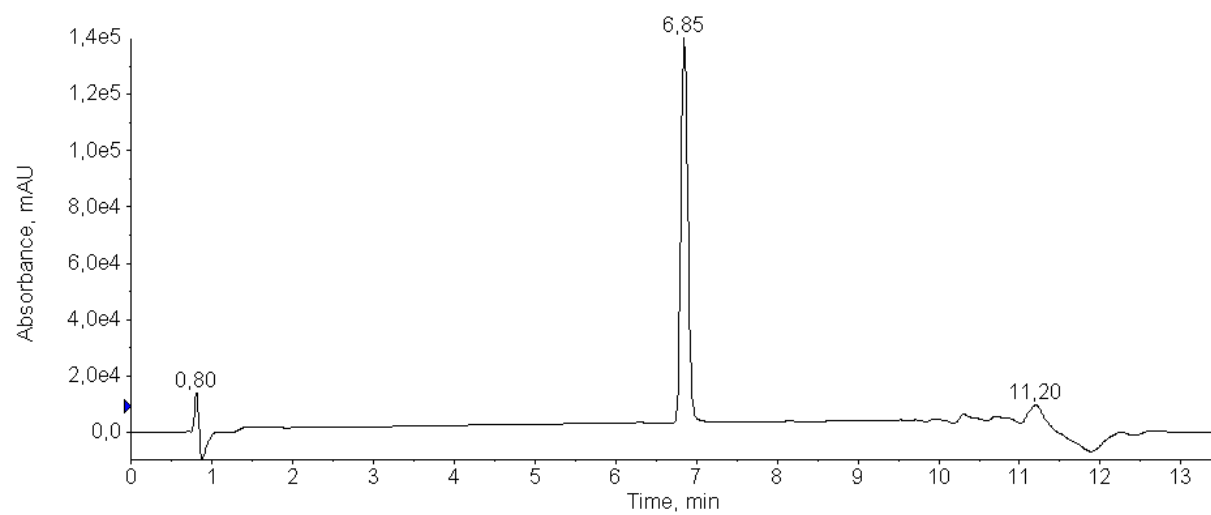

**Supporting Information Figure 53:** LC/MS analysis of **Scaff10-34**. Upper panel: Mass spectrum. Lower panel: according chromatogram.

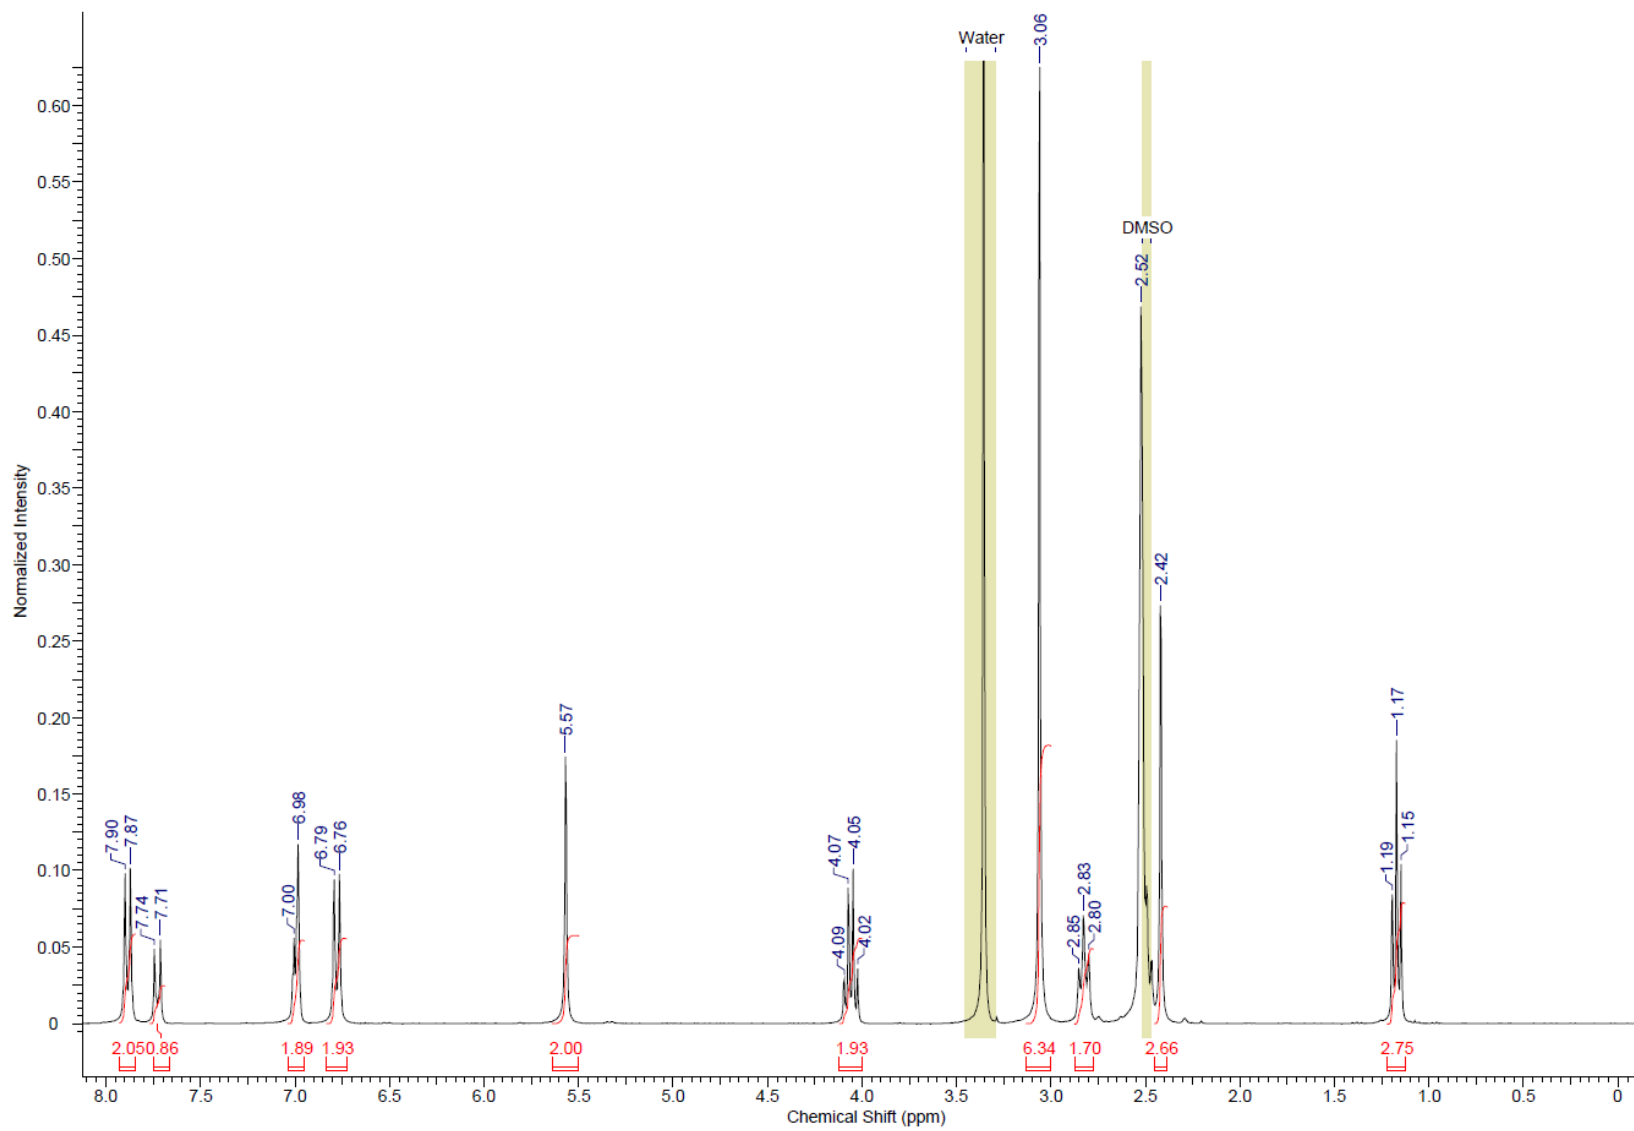

Supporting Information Figure 54: <sup>1</sup>H NMR spectrum of Scaff10-34, 300 MHz, DMSO-d<sub>6</sub>.



4.1.31 3-[7-[2-[4-(Dimethylamino)phenyl]-2-oxo-ethoxy]-4-methyl-2-oxo-chromen-3-yl]propanoic acid  
(Scaff10-35)

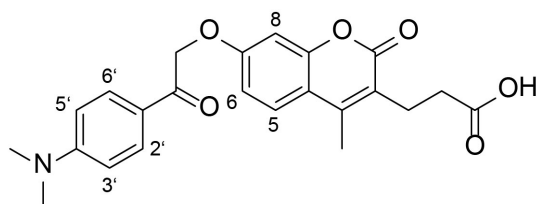

Ethyl 3-[7-[2-[4-(dimethylamino)phenyl]-2-oxo-ethoxy]-4-methyl-2-oxo-chromen-3-yl]propanoate (**Scaff10-34**) (50 mg, 0.11 mmol) was saponificated in 3 ml 1 M sodium hydroxide at 80 °C for 4 h. The product was purified using preparative HPLC with the following gradient: 10 % to 95 % ACN in H<sub>2</sub>O in 80 min. The product was obtained after lyophilisation as light yellow solid in 26 % yield (12 mg).

<sup>1</sup>H NMR (300 MHz, DMSO-d<sub>6</sub>): δ(ppm) = 1.89 – 2.02 (t, J = 7.33 Hz, 2H, -CH<sub>2</sub>-CH<sub>2</sub>-COOH), 2.33 – 2.42 (s, 3H, Ar-CH<sub>3</sub>), 2.62 – 2.73 (t, J = 7.33 Hz, 2H, -CH<sub>2</sub>-CH<sub>2</sub>-COOH), 2.97 – 3.07 (s, 6H, -N(CH<sub>3</sub>)<sub>2</sub>), 5.47 – 5.56 (s, 2H, -CO-CH<sub>2</sub>-OAr), 6.71 – 6.79 (d, J = 8.55 Hz, 2H, H-3', -5'), 6.90 – 6.96 (m, 2H, H-6, -8), 7.61 – 7.68 (d, J = 8.55 Hz, 1H, H-5), 7.82 – 7.89 (d, J = 8.55 Hz, 2H, H-2', -6')

ESI-MS: cal. 410.16, exp. 410.1 ([M+H]<sup>+</sup>)

HPLC: 98 % purity at 254 nm

t<sub>R</sub> (HPLC): 5.54 min; λ<sub>max</sub> = 344 nm

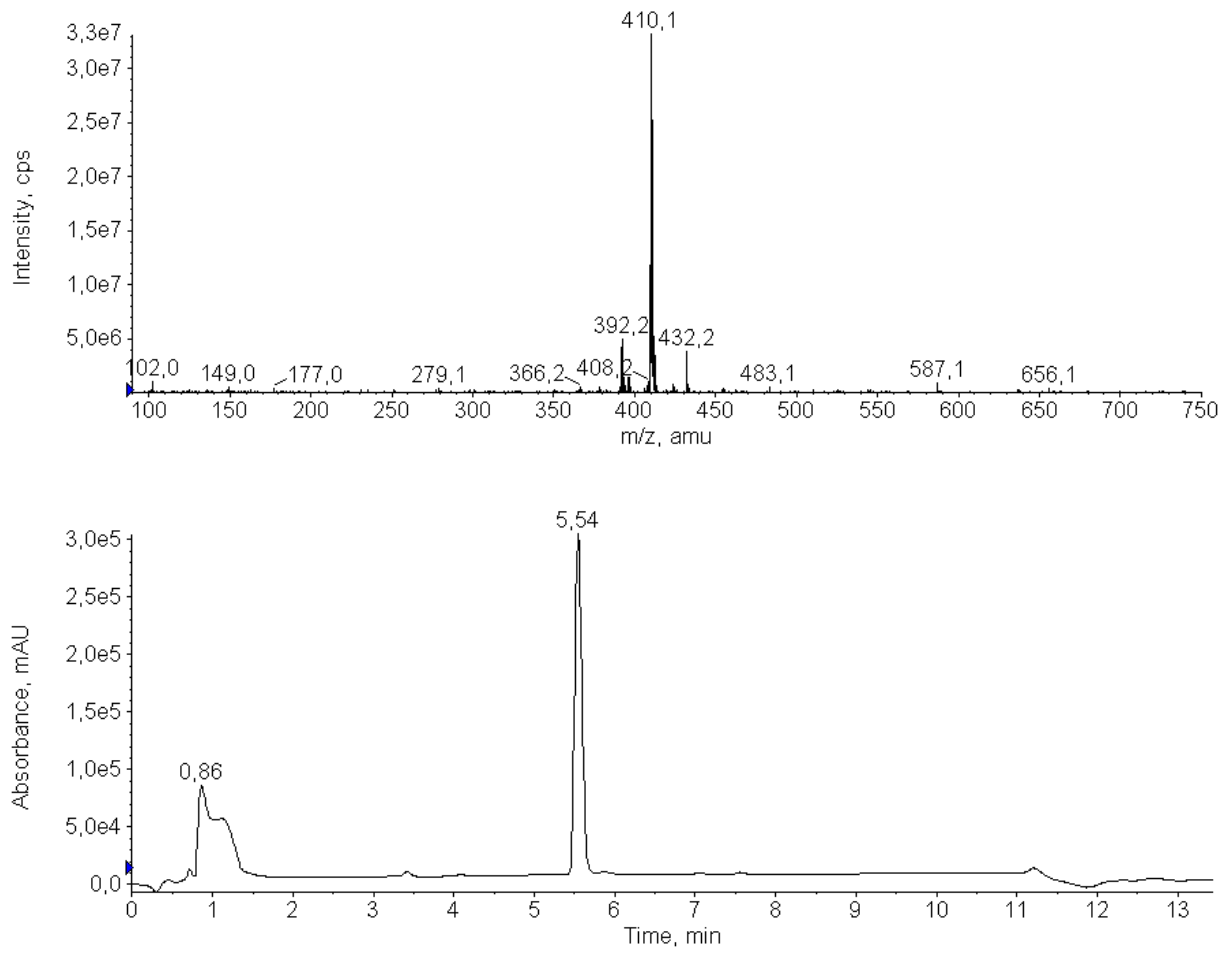

**Supporting Information Figure 55:** LC/MS analysis of **Scaff10-35**. Upper panel: Mass spectrum. Lower panel: according chromatogram.

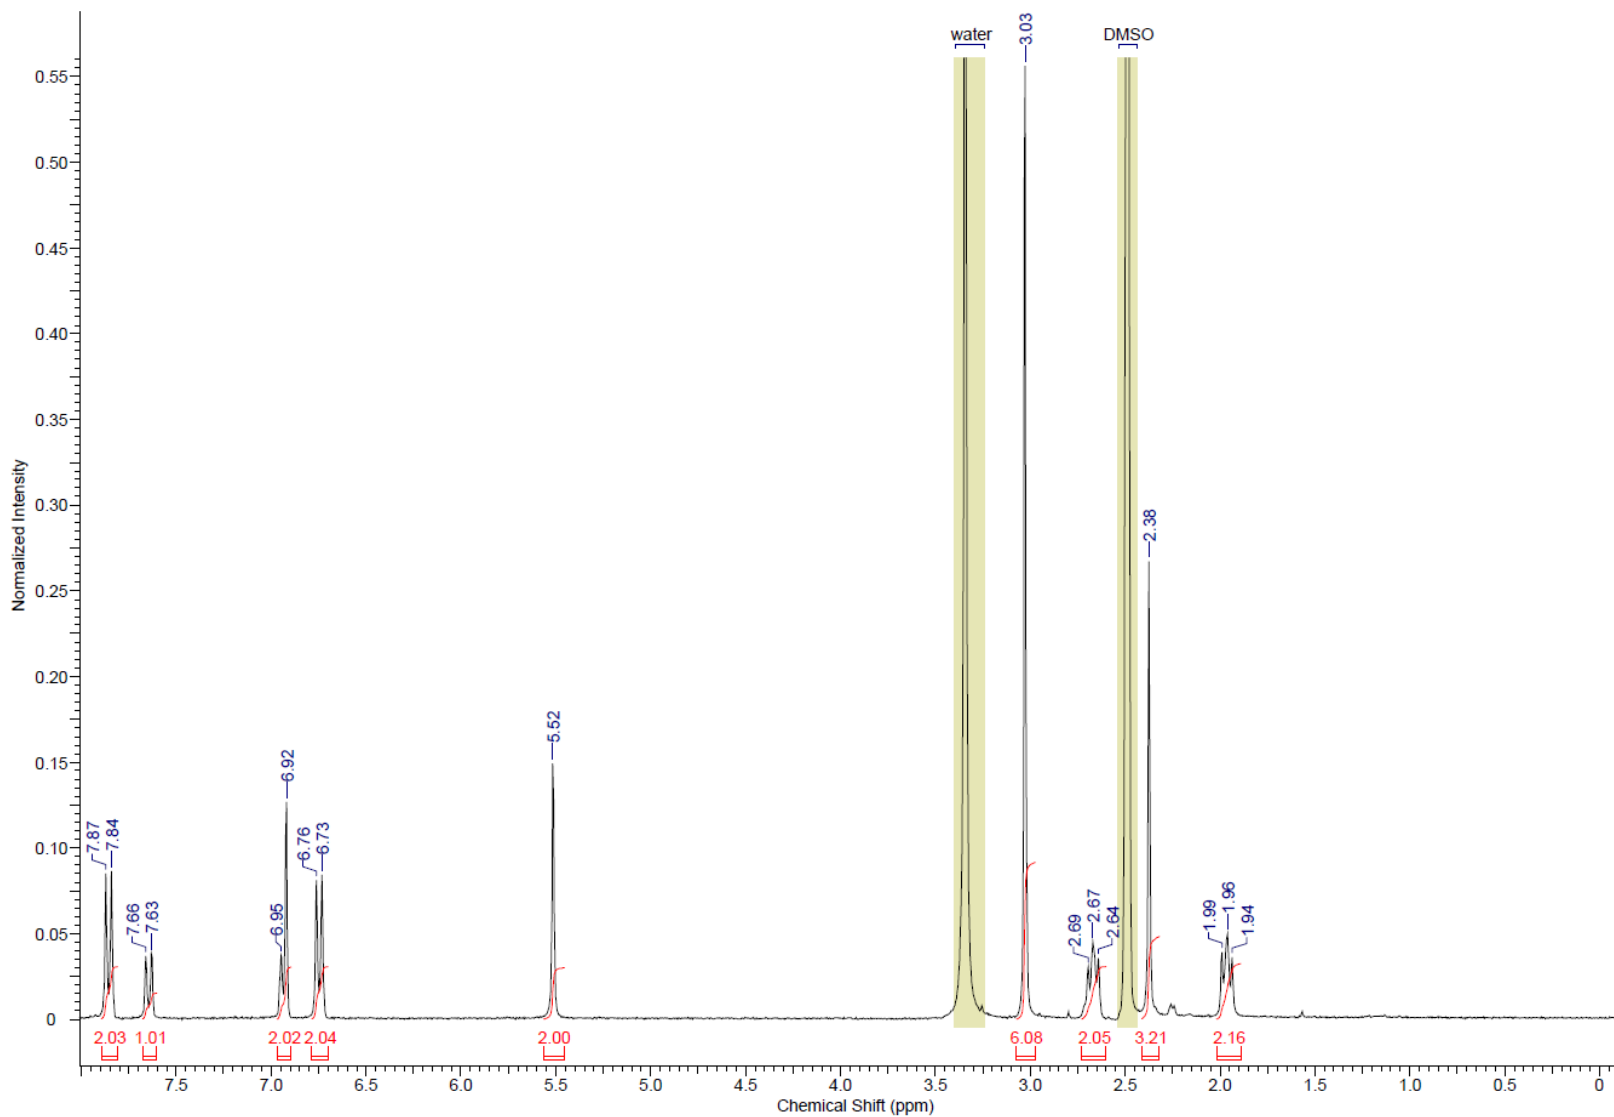

Supporting Information Figure 56:  $^1\text{H}$  NMR spectrum of **Scaff10-35**, 300 MHz,  $\text{DMSO-d}_6$ .

4.1.32 3-(4-Methyl-2-oxo-7-[2-oxo-2-(4-phenoxyphenyl)ethoxy]chromen-3-yl)propanoic acid (**Scaff10-37**)

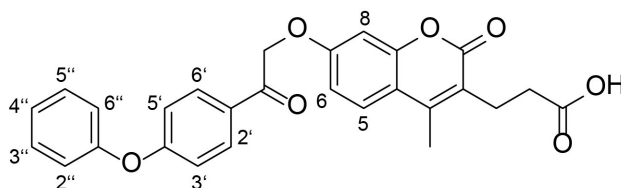

Ethyl 3-[4-methyl-2-oxo-7-[2-oxo-2-(4-phenoxyphenyl)ethoxy]chromen-3-yl]propanoate (**Scaff10-17**) (15 mg, 0.03 mmol) was saponificated in 1 M sodium hydroxide at 80 °C for 1 h. The product was purified using preparative HPLC and was obtained after lyophilisation as ivory yellow solid in 7 % yield (1 mg).

Due to the pure yield, no  $^1\text{H}$  NMR spectrum was obtained.

ESI-MS: cal. 459.14, exp. 459.1 ( $[\text{M}+\text{H}]^+$ )

HPLC: 97 % purity at 254 nm

$t_{\text{R}}$  (HPLC): 6.65 min;  $\lambda_{\text{max}}$  = 280 nm and 318 nm

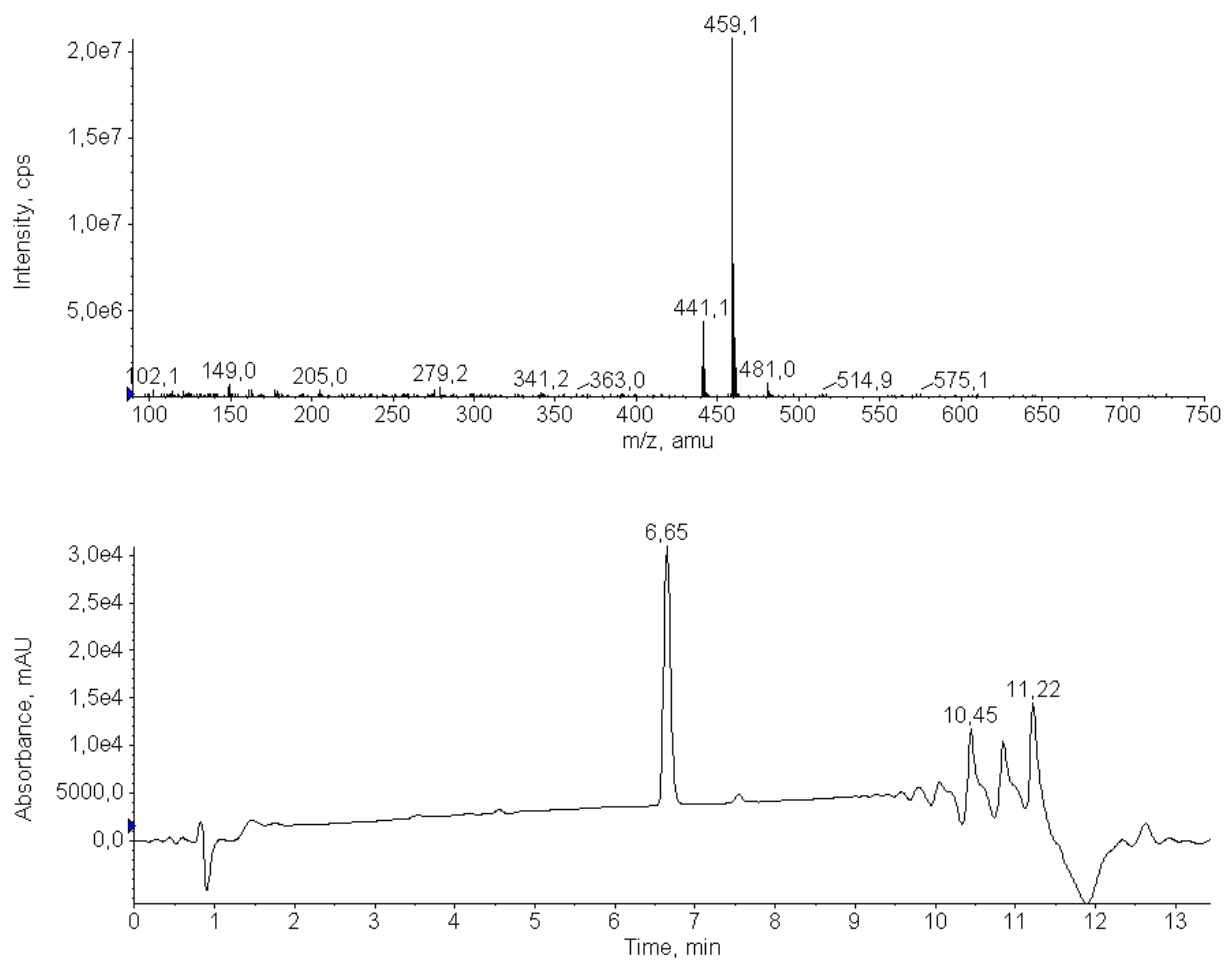

**Supporting Information Figure 57:** LC/MS analysis of **Scaff10-37**. Upper panel: Mass spectrum. Lower panel: according chromatogram.

4.1.33 3-[5-Methyl-7-oxo-3-(4-phenoxyphenyl)furo[3,2-g]chromen-6-yl]propanoic acid (**Scaff10-38**)

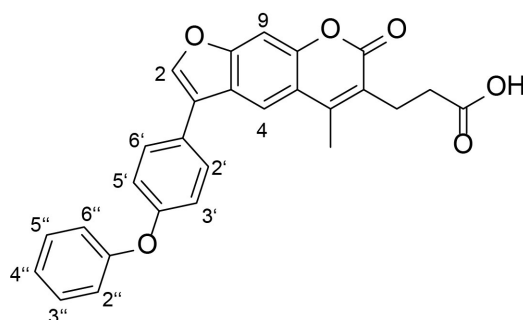

Ethyl 3-[4-methyl-2-oxo-7-[2-oxo-2-(4-phenoxyphenyl)ethoxy]chromen-3-yl]propanoate (**Scaff10-17**) (120 mg, 0.25 mmol) was saponificated in a mixture of 6 ml dry acetone, 1 ml DMSO and 6 ml 1 M sodium hydroxide at 90 °C for 1.5 h. Dropwise addition of 2 M HCl resulted in precipitation of the product. The precipitated solid was purified using preparative HPLC with the following gradient: 20 % to 95 % ACN in H<sub>2</sub>O in 80 min. The product eluted at  $t_R = 30$  min and was obtained after lyophilisation as yellow solid in 9 % yield (10 mg).

<sup>1</sup>H NMR (300 MHz, DMSO-d<sub>6</sub>):  $\delta$ (ppm) = 1.94 – 2.07 (t, J = 7.32 Hz, 2H, -CH<sub>2</sub>-CH<sub>2</sub>-COOH), 2.55 – 2.62 (s, 3H, Ar-CH<sub>3</sub>), 2.71 – 2.82 (t, J = 7.32 Hz, 2H, -CH<sub>2</sub>-CH<sub>2</sub>-COOH), 7.08 – 7.16 (d, J = 8.54 Hz, 2H, H-3', -5'), 7.15 – 7.26 (m, 3H, H-2'', -4'', -6''), 7.42 – 7.52 (t, J = 7.32 Hz, 2H, H-3'', -5''), 7.74 – 7.78 (s, 1H, H-9), 7.82 – 7.90 (d, J = 8.54 Hz, 2H, H-2', -6'), 8.12 – 8.17 (s, 1H, H-4), 8.43 – 8.46 (s, 1H, H-2)

ESI-MS: cal. 441.13, exp. 441.1 ([M+H]<sup>+</sup>)

HPLC: 97 % purity at 254 nm

$t_R$  (HPLC): 7.63 min;  $\lambda_{max} = 245$  nm and 302 nm

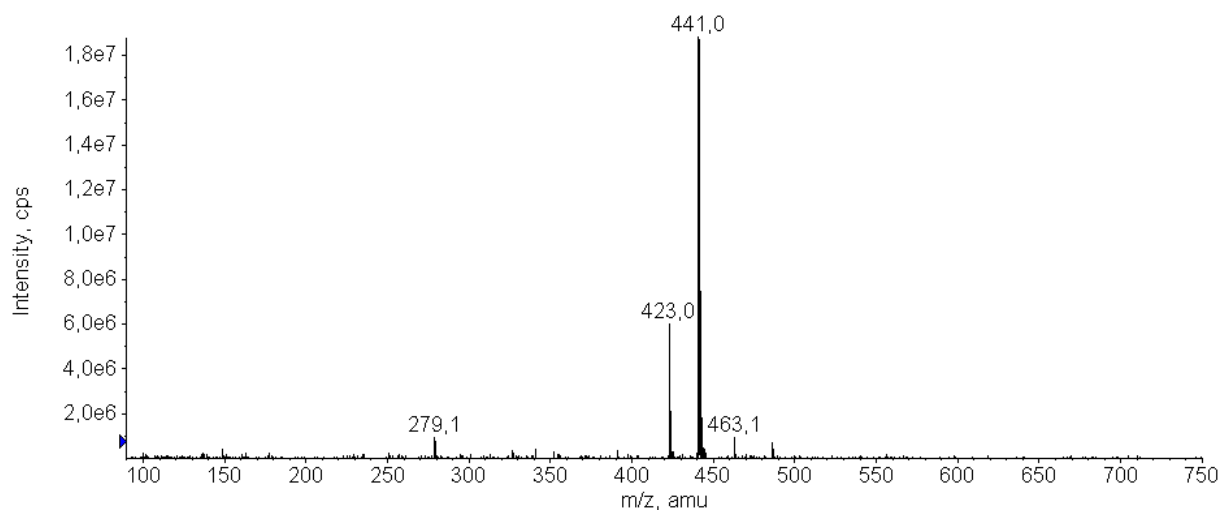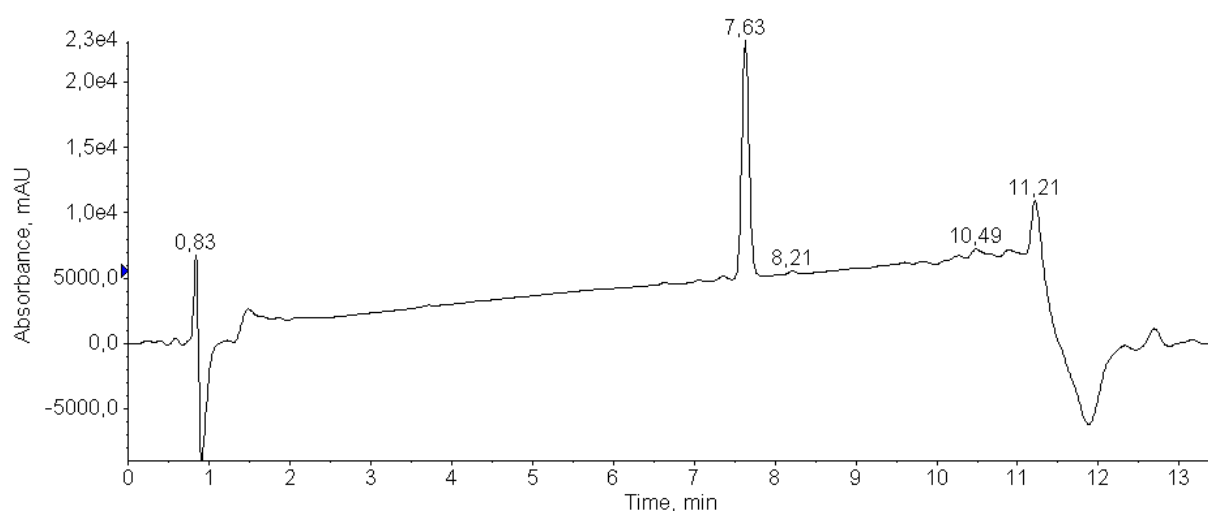

**Supporting Information Figure 58:** LC/MS analysis of **Scaff10-38**. Upper panel: Mass spectrum. Lower panel: according chromatogram.

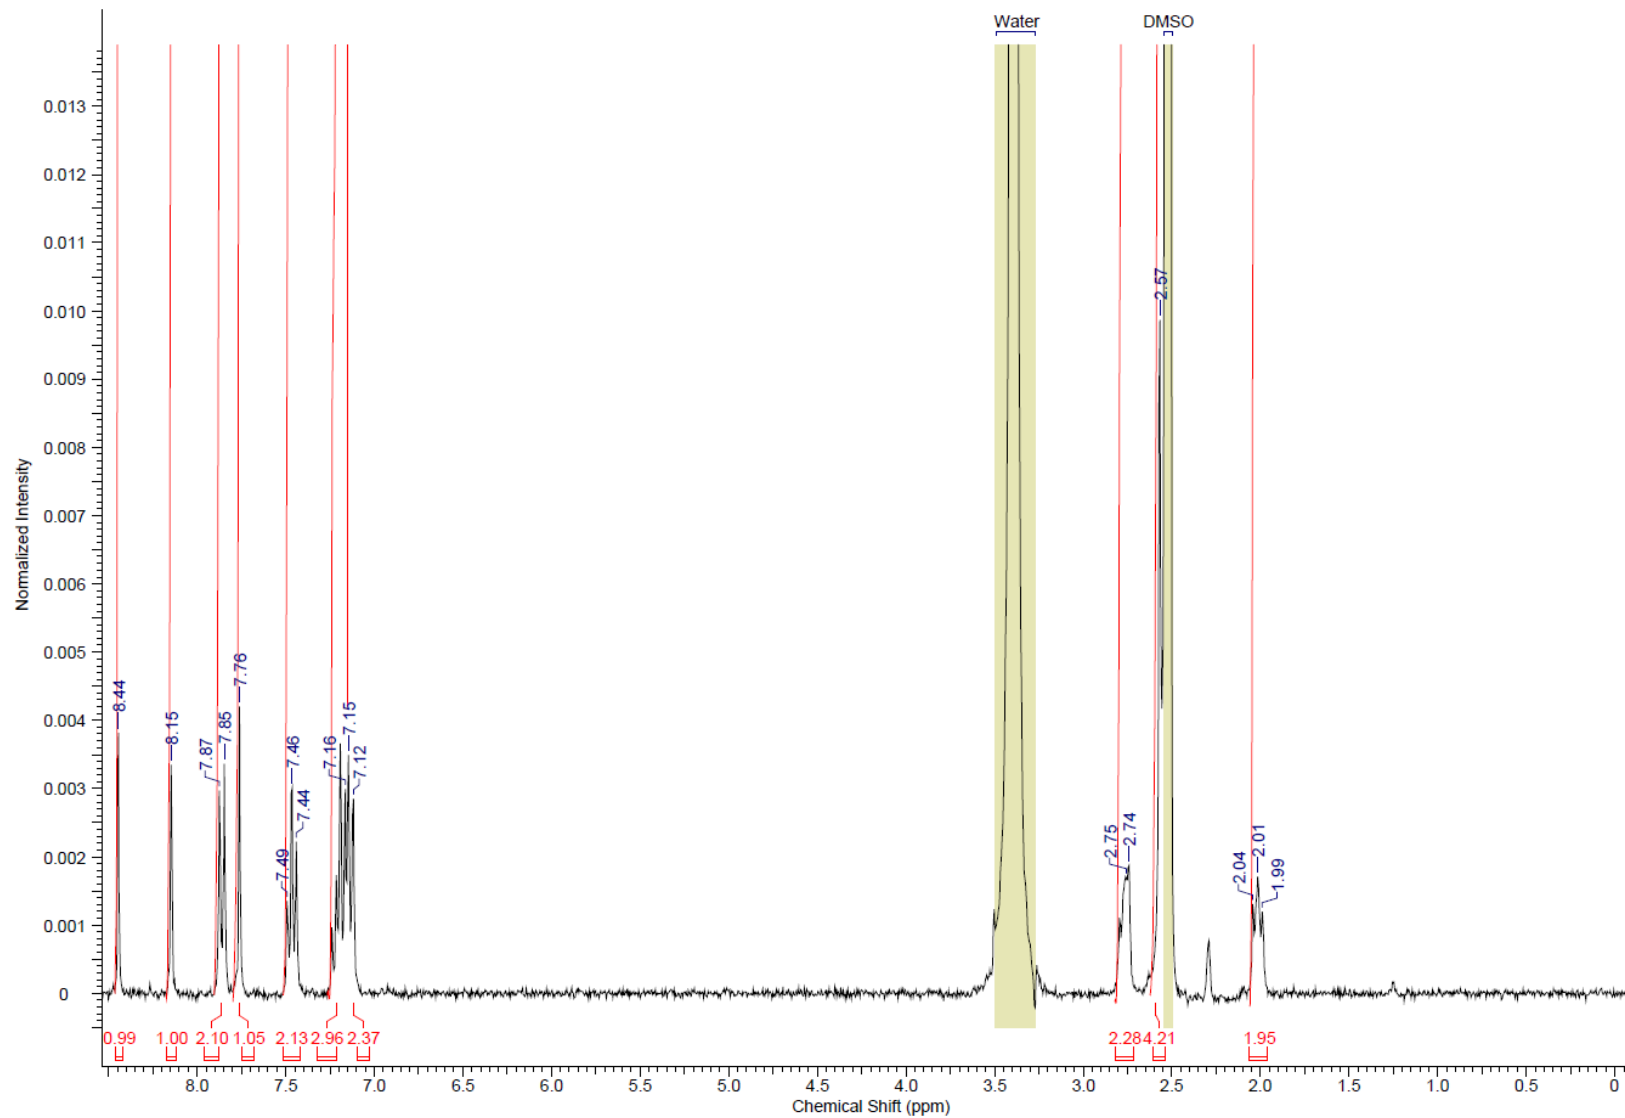

Supporting Information Figure 59: <sup>1</sup>H NMR spectrum of Scaff10-38, 300 MHz, DMSO-d<sub>6</sub>.



4.1.34 Ethyl 3-[4-methyl-2-oxo-7-[2-oxo-2-(4-phenylphenyl)ethoxy]chromen-3-yl]propanoate (**Scaff10-39**)

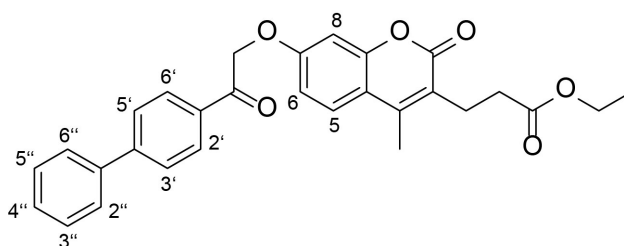

Ethyl 3-(7-hydroxy-4-methyl-2-oxo-chromen-3-yl)propanoate (**5a**) (100 mg, 0.36 mmol) was solved in 6 ml dry acetone and preactivated with potash in excess (125 mg, 0.90 mmol) at 55 °C. The  $\alpha$ -haloketone 2-bromo-1-(4-phenylphenyl)ethanone (**2f**) was added (110 mg, 0.40 mmol). The mixture was refluxed at the same temperature for 2.5 h. The product was precipitated using 1 M H<sub>2</sub>SO<sub>4</sub> and recrystallised in ethanol. The final product gave a white solid in 99 % yield (168 mg).

<sup>1</sup>H NMR (300 MHz, DMSO-d<sub>6</sub>):  $\delta$ (ppm) = 1.07 – 1.24 (t, J = 7.33 Hz, 3H, -CH<sub>2</sub>-CH<sub>3</sub>), 2.34 – 2.43 (s, 3H, Ar-CH<sub>3</sub>), 2.41 – 2.49 (t, J = 7.33 Hz, 2H, -CH<sub>2</sub>-CH<sub>2</sub>-COOEt), 2.75 – 2.89 (t, J = 7.33 Hz, 2H, -CH<sub>2</sub>-CH<sub>2</sub>-COOEt), 3.98 – 4.12 (q, J = 7.33 Hz, 2H, -CH<sub>2</sub>-CH<sub>3</sub>), 5.71 – 5.85 (s, 2H, -CO-CH<sub>2</sub>-OAr), 7.00 – 7.12 (m, 2H, H-6, -8), 7.42 – 7.58 (m, 3H, H-5, -3'', -5''), 7.69 – 7.83 (m, 3H, H-2'', -4'', -6''), 7.86 – 7.95 (d, J = 8.55 Hz, 2H, H-3', -5'), 8.08 – 8.17 (d, J = 7.33 Hz, 2H, H-2', -6')

ESI-MS: cal. 471.18, exp. 471.2 ([M+H]<sup>+</sup>)

HPLC: 95 % purity at 254 nm

t<sub>R</sub> (HPLC): 7.66 min;  $\lambda_{\text{max}}$  = 290 nm and 306 nm

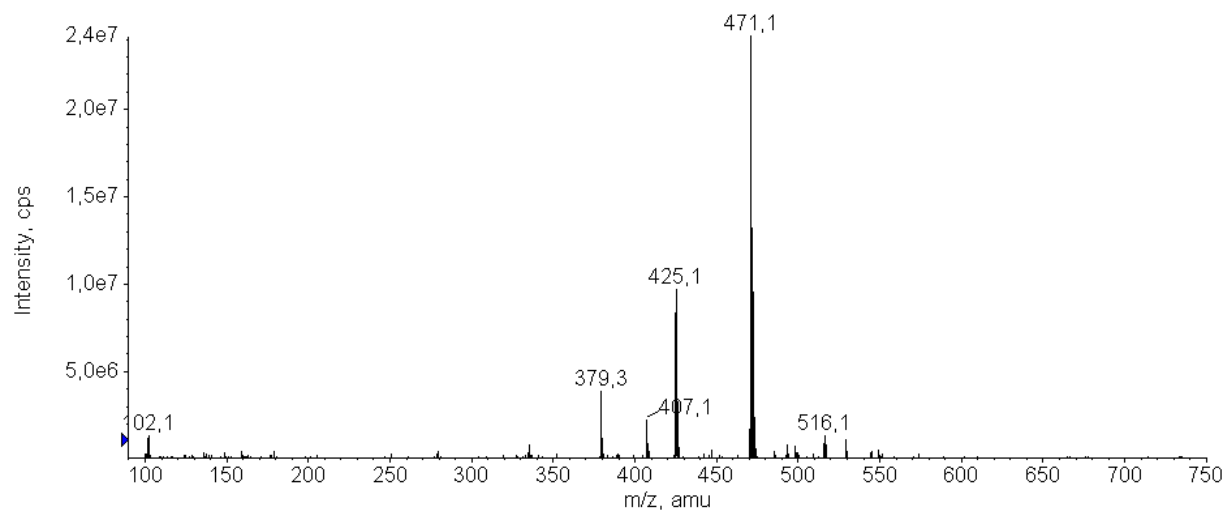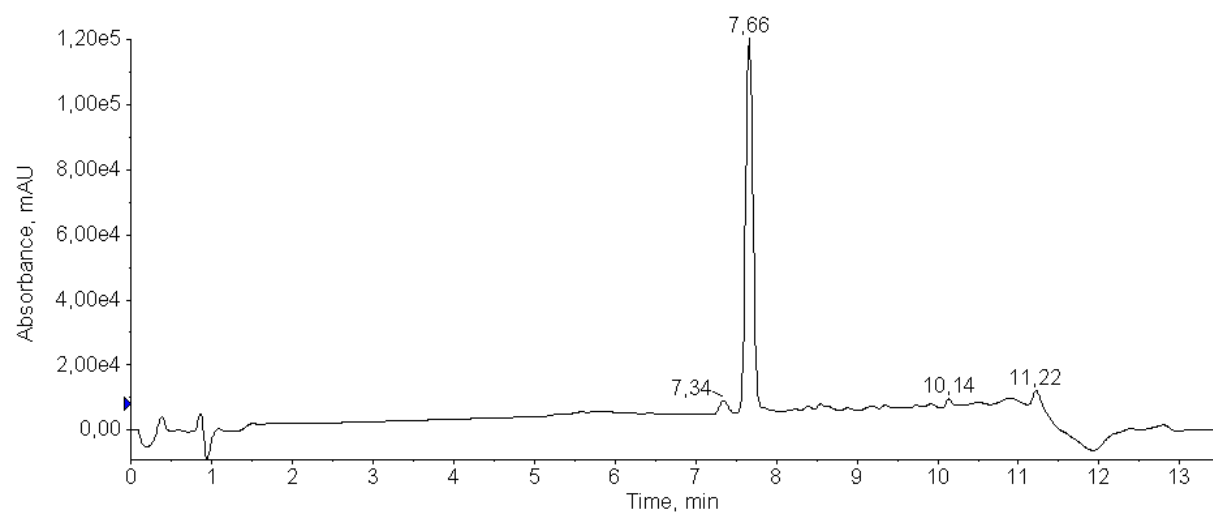

**Supporting Information Figure 60:** LC/MS analysis of **Scaff10-39**. Upper panel: Mass spectrum. Lower panel: according chromatogram.

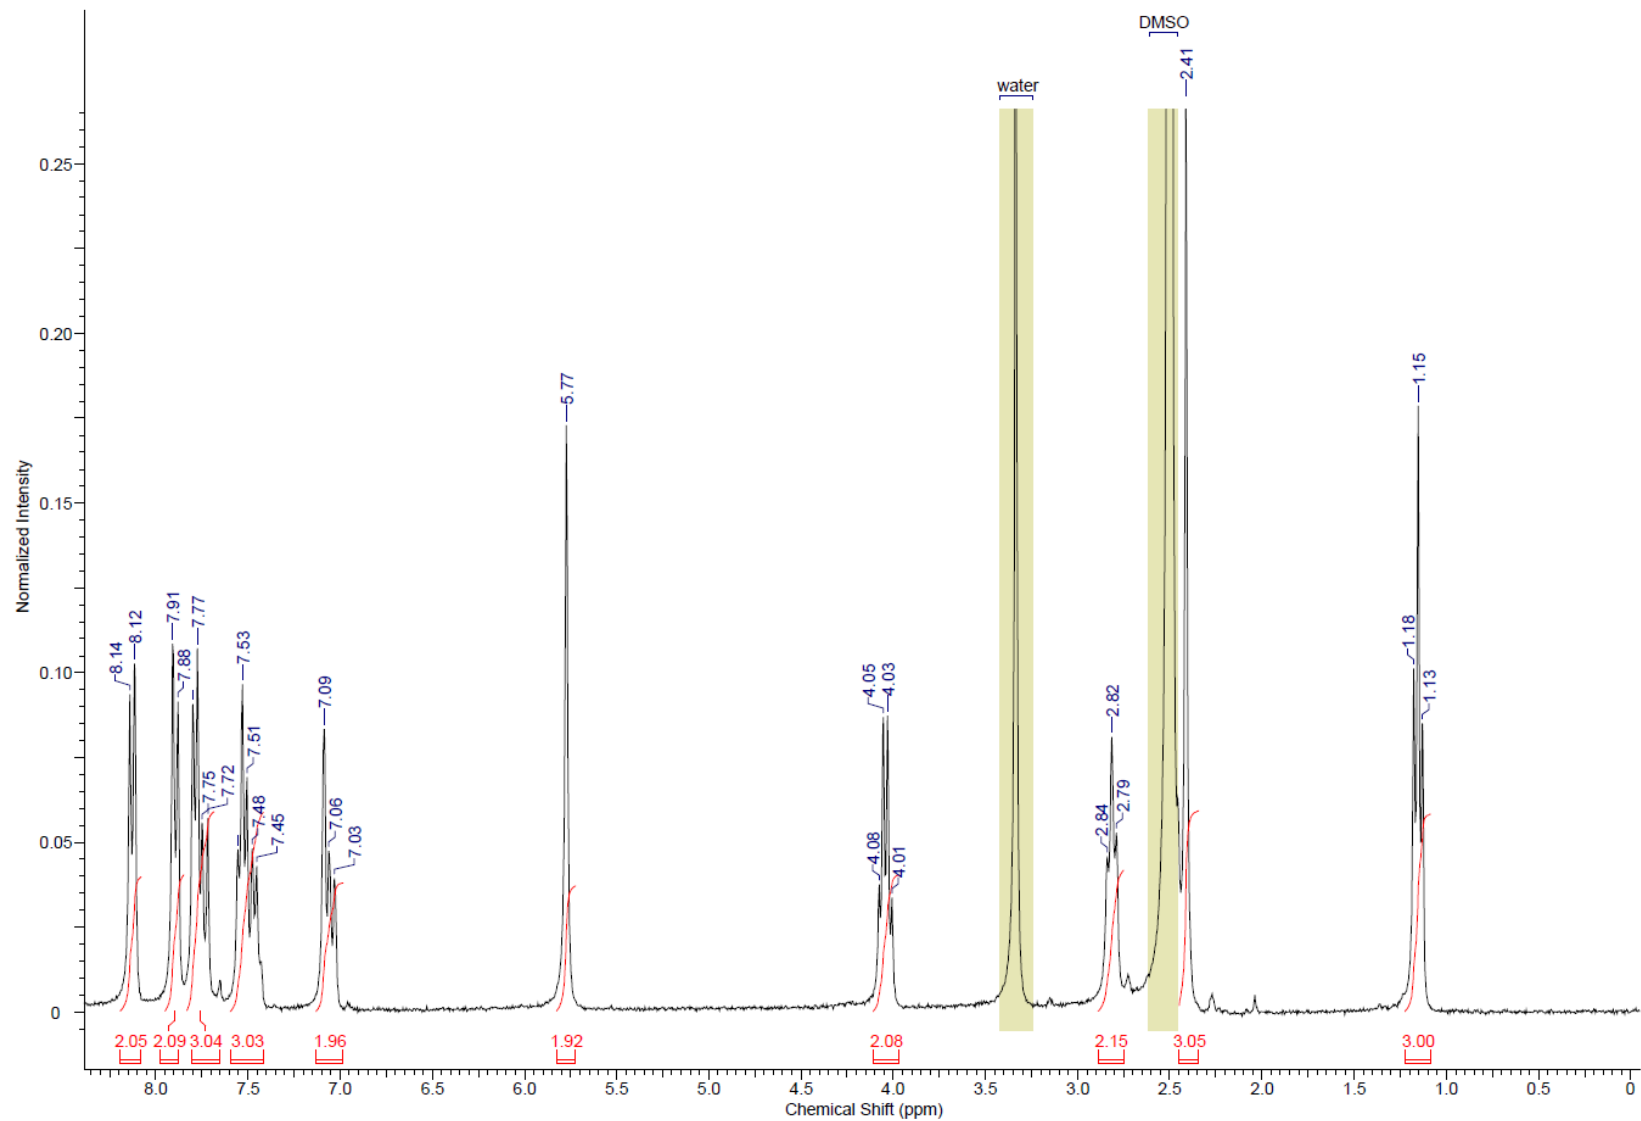

Supporting Information Figure 61: <sup>1</sup>H NMR spectrum of Scaff10-39, 300 MHz, DMSO-d<sub>6</sub>.

4.1.35 3-[4-Methyl-2-oxo-7-[2-oxo-2-(4-phenylphenyl)ethoxy]chromen-3-yl]propanoic acid (**Scaff10-40**)

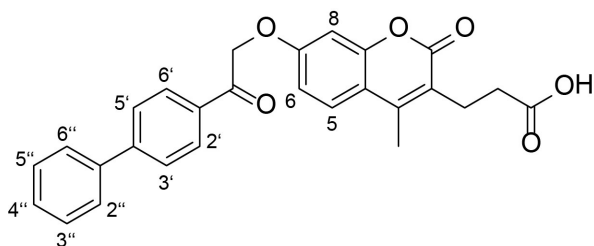

Ethyl 3-[4-methyl-2-oxo-7-[2-oxo-2-(4-phenylphenyl)ethoxy]chromen-3-yl]propanoate (**Scaff10-39**) (55 mg, 0.12 mmol) was saponificated in a mixture of 1 ml DMF and 1 ml 1 M sodium hydroxide at 55 °C for 1 h. The product was purified using preparative HPLC with the following gradient: 10 % to 90 % ACN in H<sub>2</sub>O in 80 min. The product eluted at  $t_R = 40$  min and was obtained after lyophilisation as white solid in 35 % yield (18 mg).

<sup>1</sup>H NMR (300 MHz, DMSO-d<sub>6</sub>):  $\delta$ (ppm) = 2.02 – 2.13 (t, J = 7.32 Hz, 2H, -CH<sub>2</sub>-CH<sub>2</sub>-COOH), 2.33 – 2.43 (s, 3H, Ar-CH<sub>3</sub>), 2.64 – 2.77 (t, J = 7.32 Hz, 2H, -CH<sub>2</sub>-CH<sub>2</sub>-COOH), 5.70 – 5.80 (s, 2H, -CO-CH<sub>2</sub>-OAr), 6.98 – 7.09 (m, 2H, H-6, -8), 7.41 – 7.49 (t, J = 7.32 Hz, 1H, H-4''), 7.48 – 7.58 (t, J = 7.32 Hz, 3H, H-3'', -5''), 7.65 – 7.72 (d, J = 8.54 Hz, 1H, H-5), 7.74 – 7.83 (d, J = 7.32 Hz, 2H, H-2'', -6''), 7.86 – 7.93 (d, J = 8.55 Hz, 2H, H-2', -6'), 8.09 – 8.17 (d, J = 8.55 Hz, 2H, H-3', -5')

ESI-MS: cal. 443.14, exp. 443.1 ([M+H]<sup>+</sup>)

HPLC: 98 % purity at 254 nm

$t_R$  (HPLC): 6.69 min;  $\lambda_{max} = 293$  nm and 308 nm

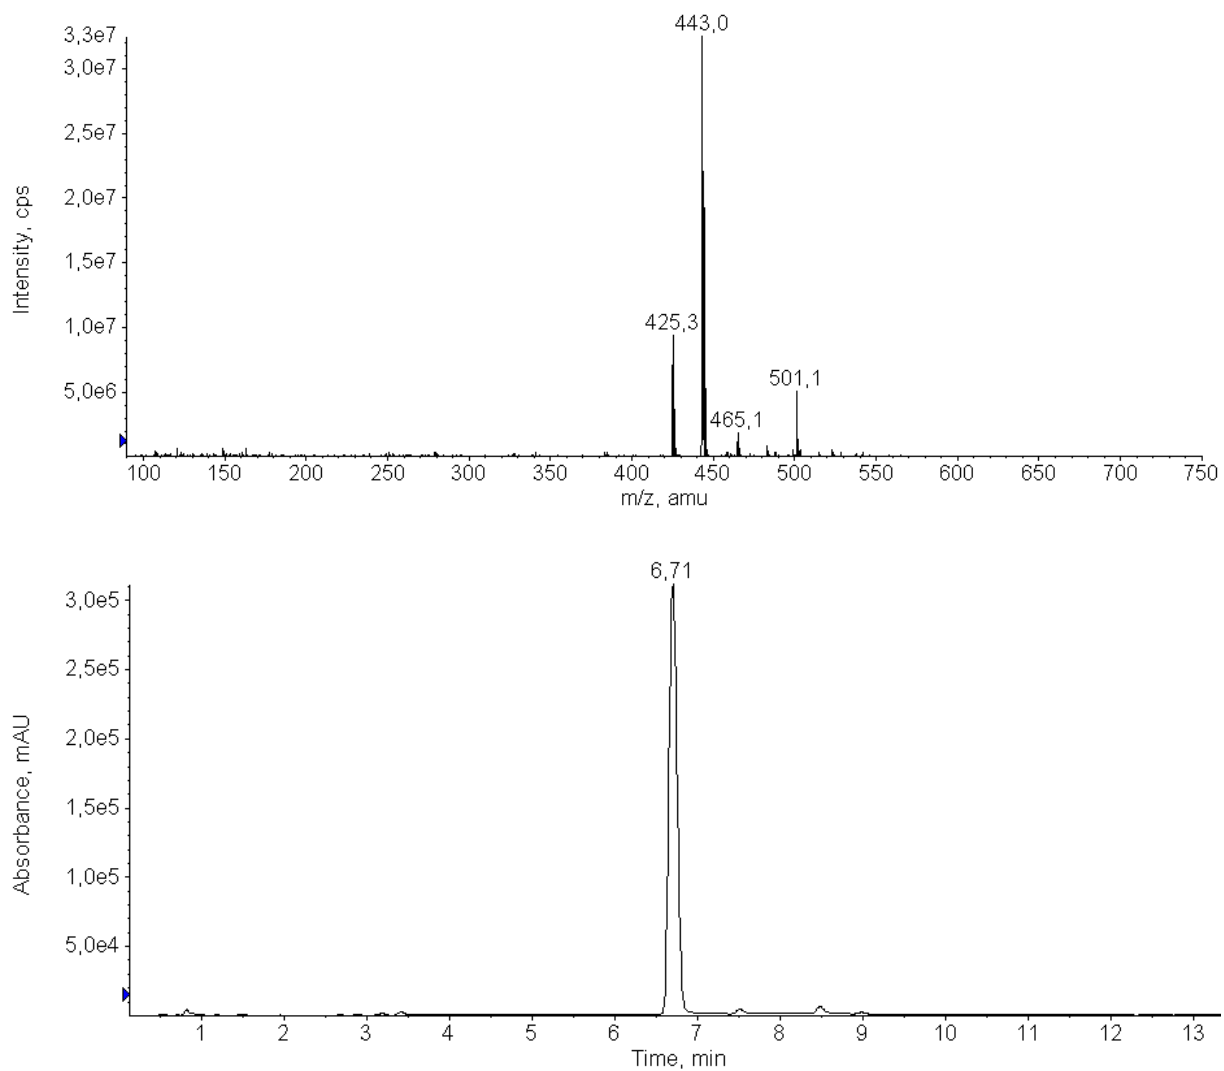

**Supporting Information Figure 62:** LC/MS analysis of **Scaff10-40**. Upper panel: Mass spectrum. Lower panel: according chromatogram.

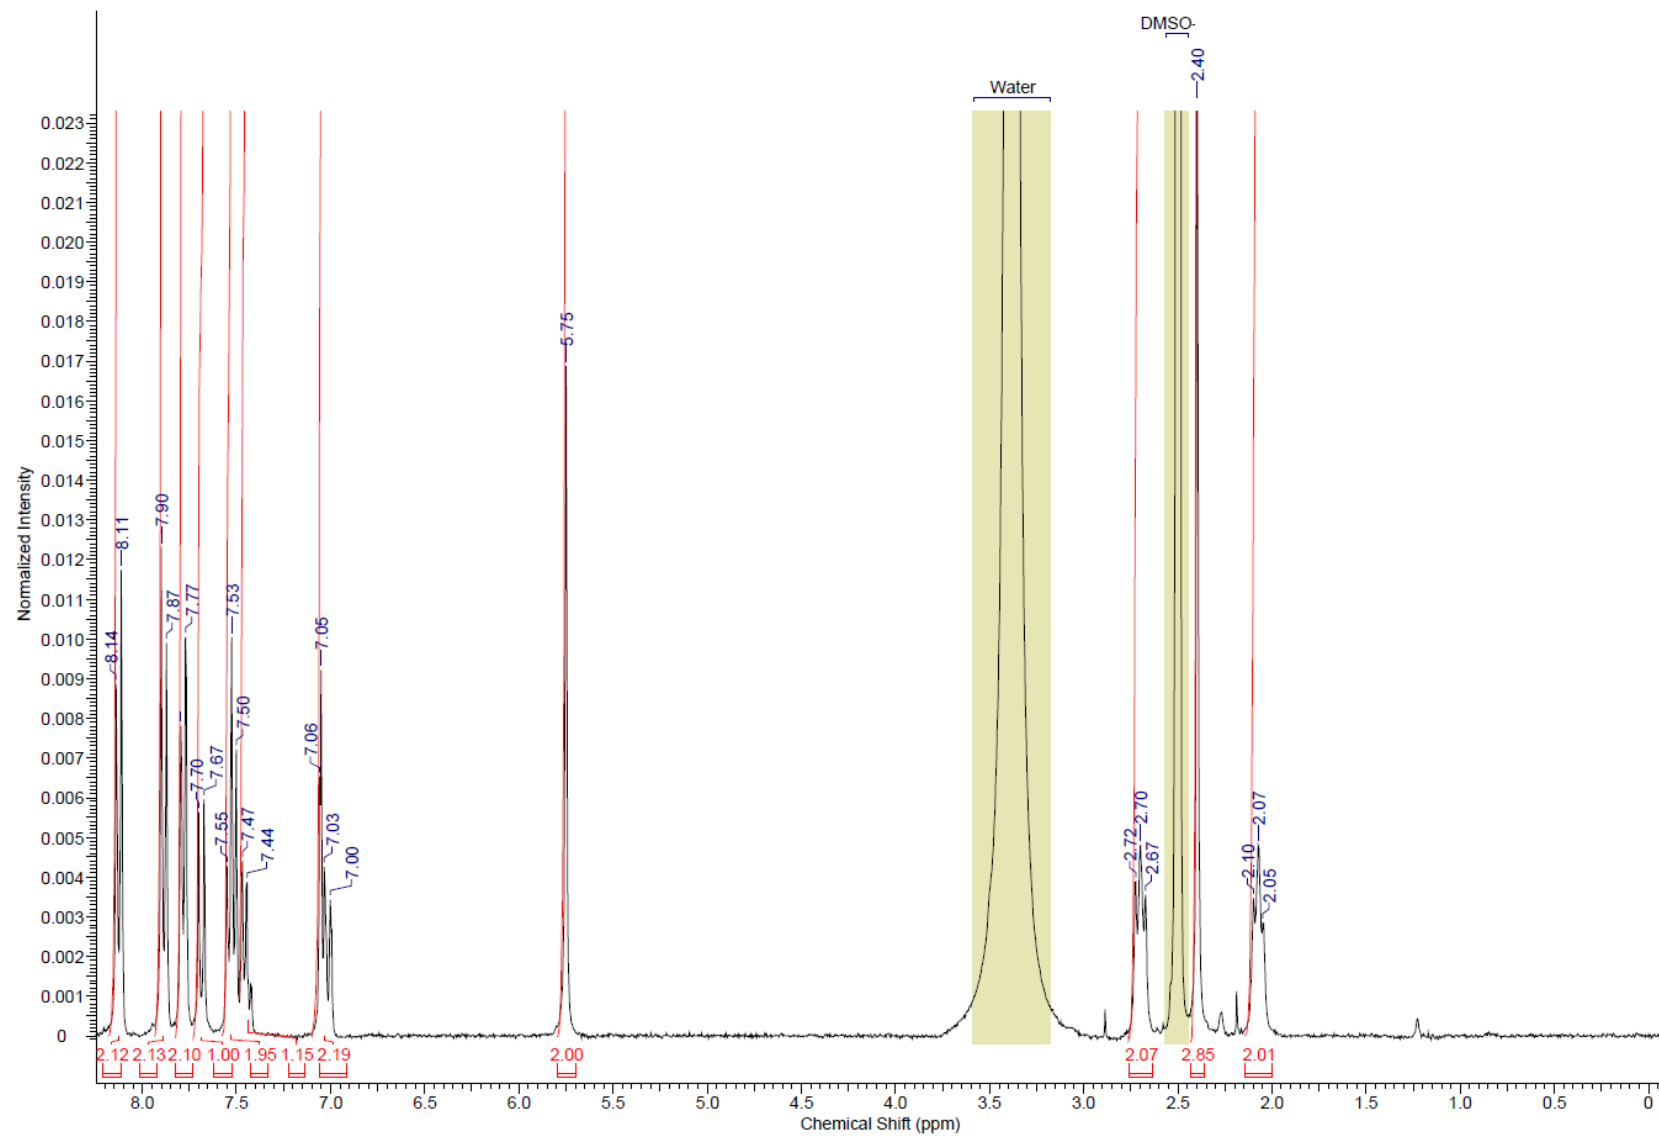

Supporting Information Figure 63:  $^1\text{H}$  NMR spectrum of Scaff10-40, 300 MHz,  $\text{DMSO-d}_6$ .

4.1.36 3-[5-Methyl-7-oxo-3-(4-phenylphenyl)furo[3,2-g]chromen-6-yl]propanoic acid (**Scaff10-41**)

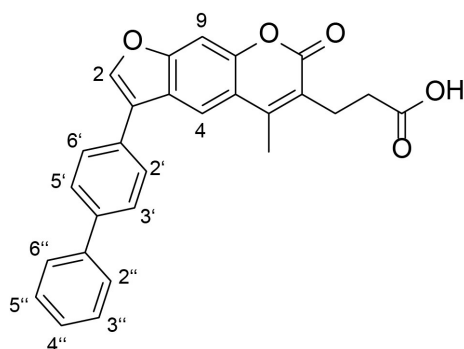

Ethyl 3-[4-methyl-2-oxo-7-[2-oxo-2-(4-phenylphenyl)ethoxy]chromen-3-yl]propanoate (**Scaff10-39**) (120 mg, 0.26 mmol) was saponificated in a mixture of 7 ml dry acetone and 7 ml 1 M sodium hydroxide at 90 °C for 1.5 h. Dropwise addition of 1 M HCl resulted in precipitation of the product. The precipitated solid was purified using preparative HPLC with the following gradient: 5 % to 95 % ACN in H<sub>2</sub>O in 80 min. The product eluted at  $t_R = 34.5$  min and was obtained after lyophilisation as yellowish solid in 34 % yield (37 mg).

<sup>1</sup>H NMR (300 MHz, DMSO-d<sub>6</sub>):  $\delta$ (ppm) = 2.00 – 2.14 (t, J = 8.54 Hz, 2H, -CH<sub>2</sub>-CH<sub>2</sub>-COOH), 2.56 – 2.66 (s, 3H, Ar-CH<sub>3</sub>), 2.73 – 2.86 (t, J = 8.54 Hz, 2H, -CH<sub>2</sub>-CH<sub>2</sub>-COOH), 7.37 – 7.47 (t, J = 7.32 Hz, 1H, H-4''), 7.48 – 7.57 (t, J = 7.32 Hz, 2H, H-3'', -5''), 7.74 – 7.82 (m, 3H, H-9, -2'', -6''), 7.83 – 7.90 (d, J = 7.32 Hz, 2H, H-2', -6'), 7.90 – 7.98 (d, J = 8.54 Hz, 2H, H-3', -5'), 8.18 – 8.23 (s, 1H, H-4), 8.52 – 8.56 (s, 1H, H-2)

ESI-MS: cal. 425.13, exp. 425.1 ([M+H]<sup>+</sup>)

HPLC: 97 % purity at 254 nm

$t_R$  (HPLC): 7.61 min;  $\lambda_{max} = 253$  nm and 301 nm

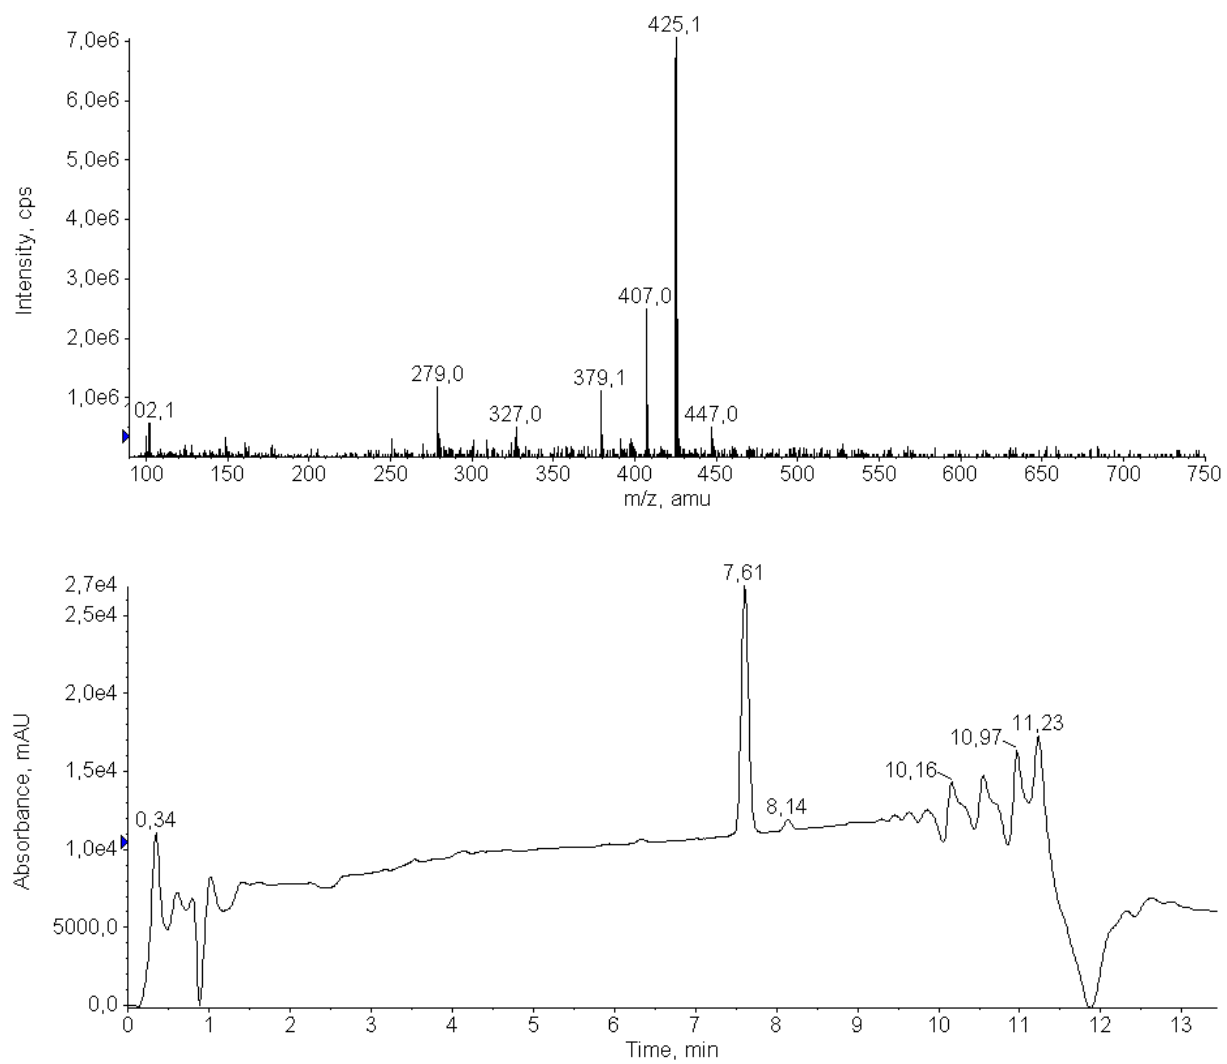

**Supporting Information Figure 64.** LC/MS analysis of **Scaff10-41**. Upper panel: Mass spectrum. Lower panel: according chromatogram.



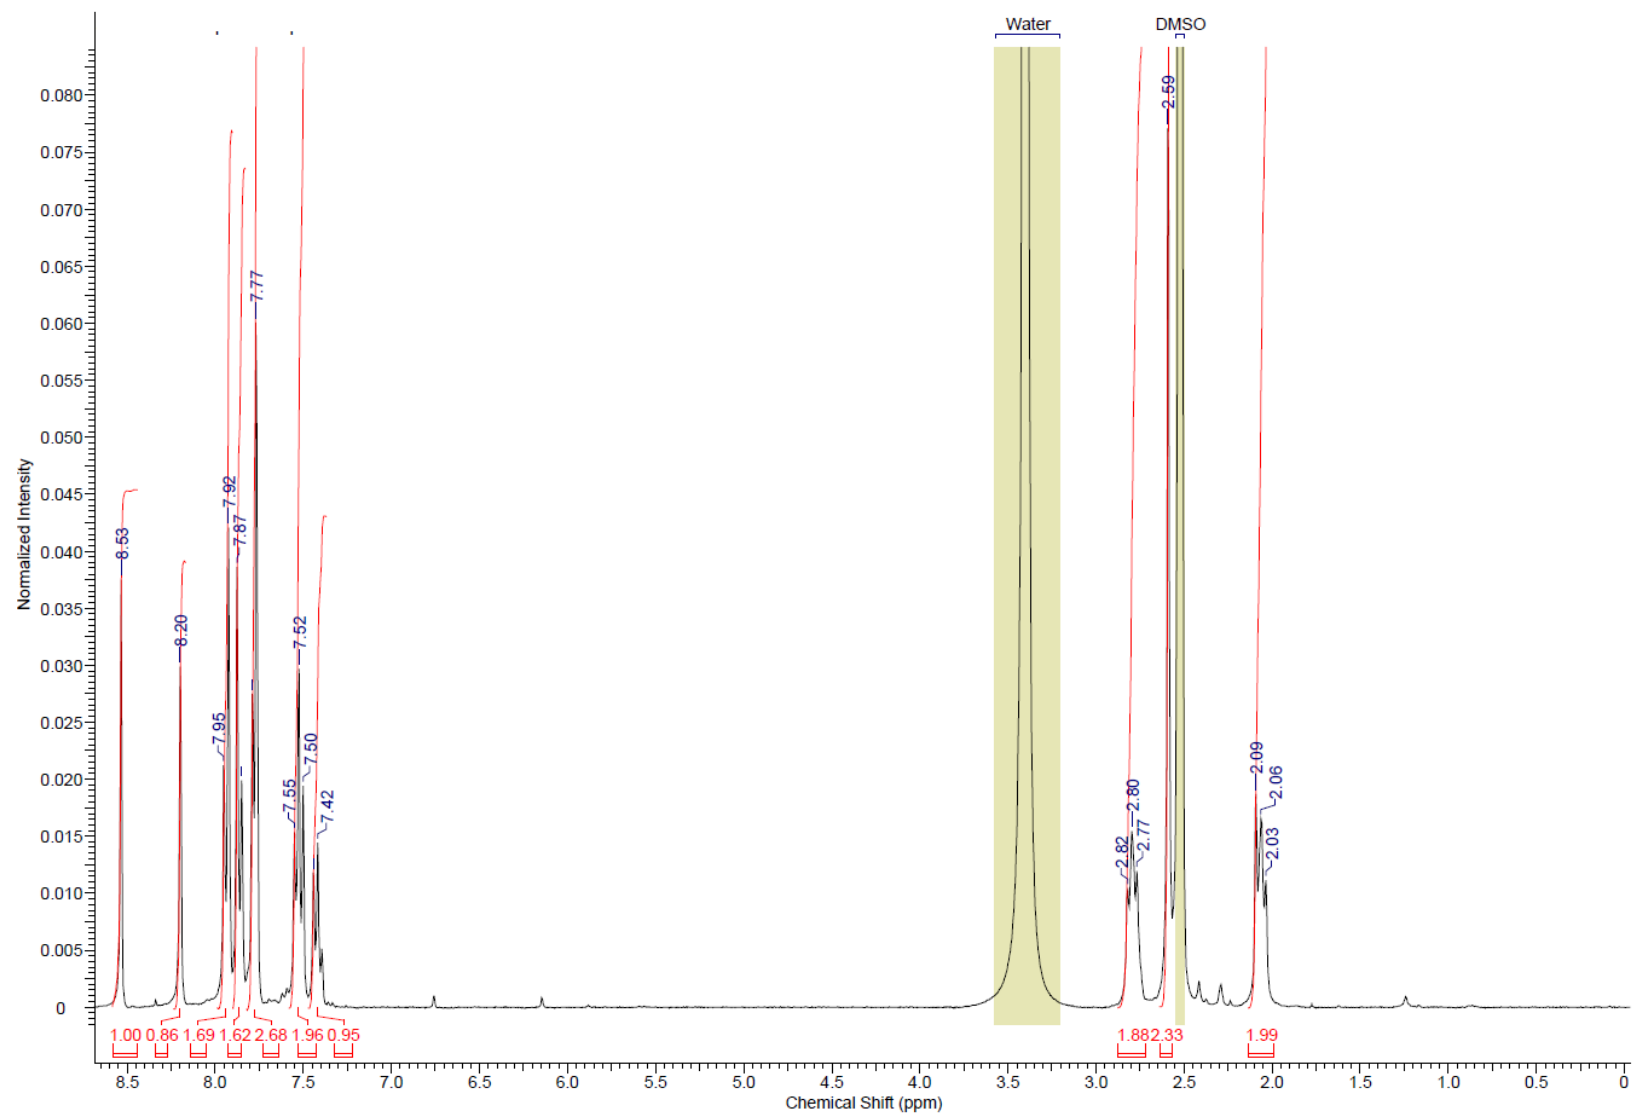

Supporting Information Figure 65: <sup>1</sup>H NMR spectrum of Scaff10-41, 300 MHz, DMSO-d<sub>6</sub>.

4.1.37 Ethyl 3-(7-[2-(6-methoxy-2-naphthyl)-2-oxo-ethoxy]-4-methyl-2-oxo-chromen-3-yl)propanoate  
(Scaff10-42)

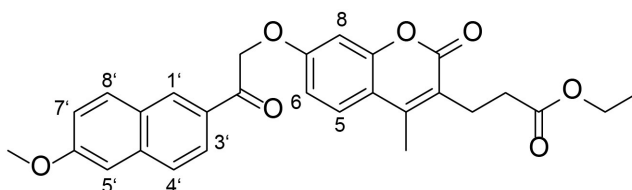

Ethyl 3-(7-hydroxy-4-methyl-2-oxo-chromen-3-yl)propanoate (**5a**) (100 mg, 0.36 mmol) was solved in acetone and preactivated with potash in excess (125 mg, 0.90 mmol) at 55 °C. The  $\alpha$ -haloketone 2-bromo-1-(6-methoxy-2-naphthyl)ethanone (**2h**) was added (100 mg, 0.34 mmol). The product was precipitated using 1 M H<sub>2</sub>SO<sub>4</sub> and washed with ethanol. The precipitated solid was purified using preparative HPLC. The final product after lyophilisation gave a bright yellow solid.

<sup>1</sup>H NMR (300 MHz, DMSO-d<sub>6</sub>):  $\delta$ (ppm) = 1.12 – 1.27 (t, J = 7.32 Hz, 3H, -CH<sub>2</sub>-CH<sub>3</sub>), 2.39 – 2.46 (s, 3H, Ar-CH<sub>3</sub>), 2.44 – 2.53 (t, J = 7.32 Hz, 2H, -CH<sub>2</sub>-CH<sub>2</sub>-COOEt), 2.77 – 2.88 (t, J = 7.32 Hz, 2H, -CH<sub>2</sub>-CH<sub>2</sub>-COOEt), 3.91 – 4.01 (s, 3H, -OCH<sub>3</sub>), 4.10 – 4.12 (q, J = 7.32 Hz, 2H, -CH<sub>2</sub>-CH<sub>3</sub>), 5.80 – 5.92 (s, 2H, -CO-CH<sub>2</sub>-OAr), 7.04 – 7.15 (m, 2H, H-5', -7'), 7.27 – 7.37 (dd, J = 2.44 Hz, 8.55 Hz, 1H, H-6), 7.44 – 7.50 (s, 1H, H-8), 7.72 – 7.79 (d, J = 9.77 Hz, 1H, H-5), 7.93 – 8.11 (m, 3H, H-3', -4', -8'), 8.70 – 8.76 (s, 1H, H-1')

ESI-MS: cal. 475.17, exp. 475.1 ([M+H]<sup>+</sup>)

HPLC: 98 % purity at 254 nm

t<sub>R</sub> (HPLC): 7.51 min;  $\lambda_{\max}$  = 261 nm and 319 nm

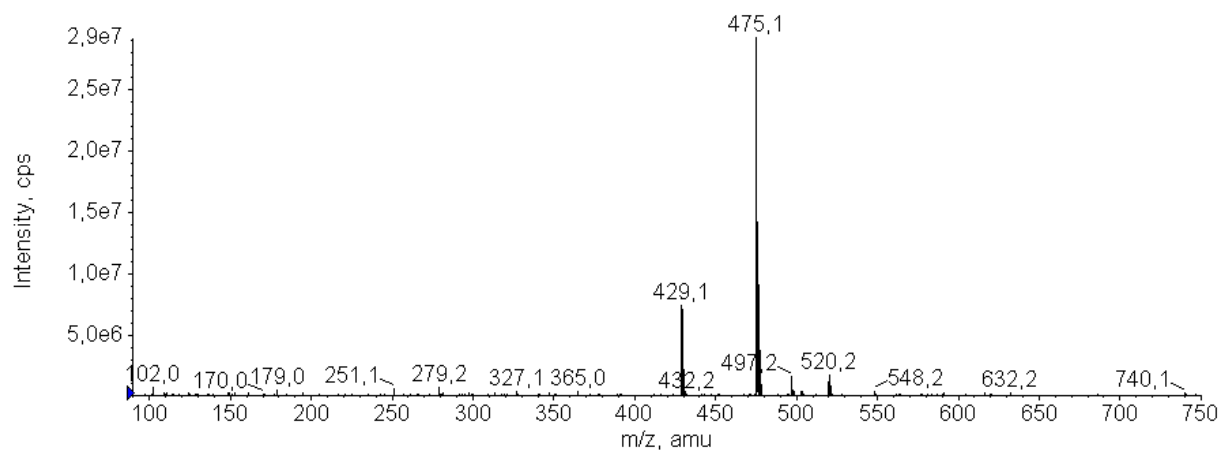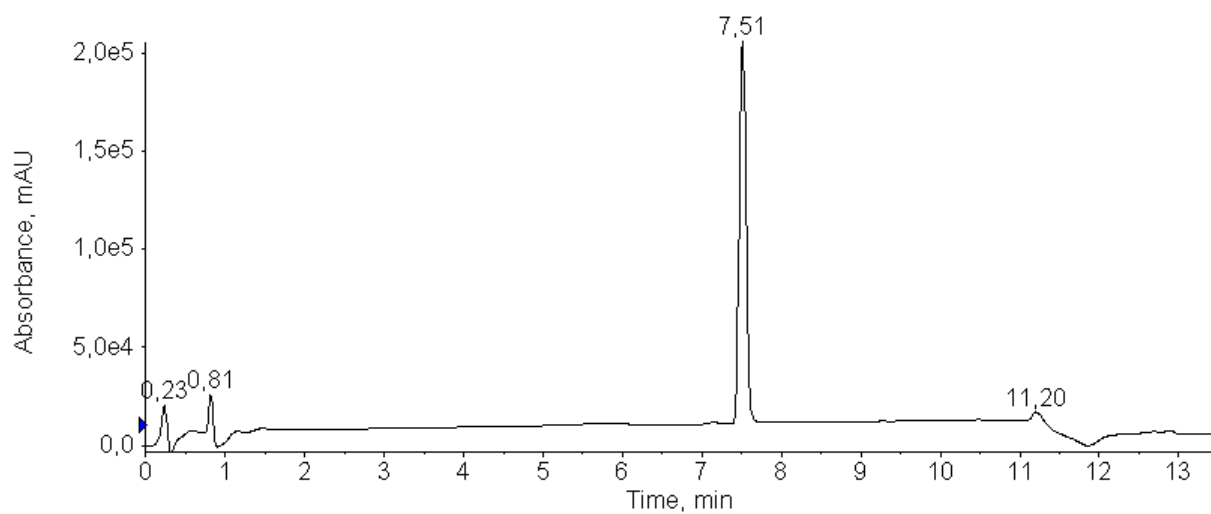

**Supporting Information Figure 66:** LC/MS analysis of **Scaff10-42**. Upper panel: Mass spectrum. Lower panel: according chromatogram.

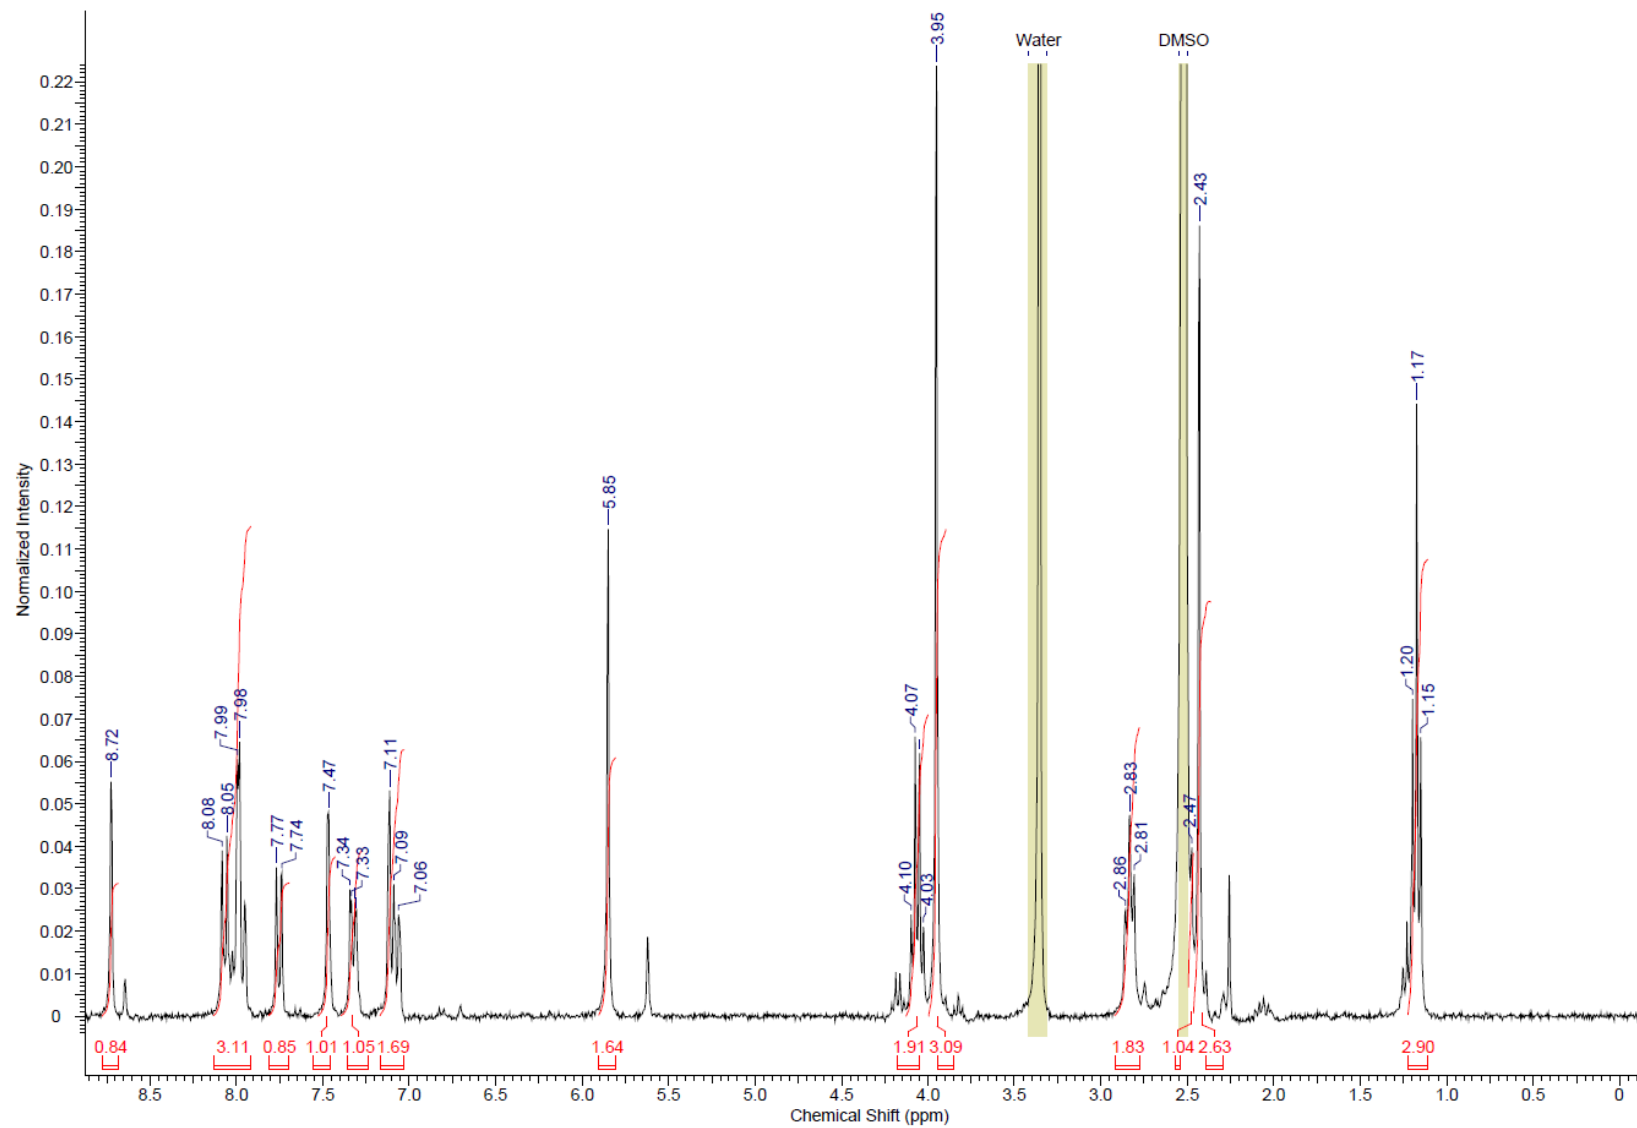

Supporting Information Figure 67:  $^1\text{H}$  NMR spectrum of Scaff10-42, 300 MHz,  $\text{DMSO-d}_6$ .

4.1.38 3-(7-[2-(6-Methoxy-2-naphthyl)-2-oxo-ethoxy]-4-methyl-2-oxo-chromen-3-yl)propanoic acid (**Scaff10-43**)

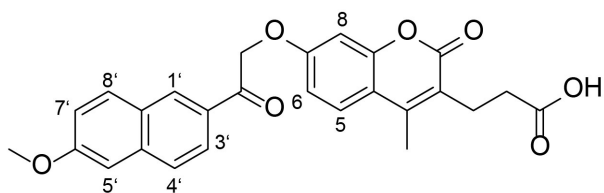

Ethyl 3-(7-[2-(6-methoxy-2-naphthyl)-2-oxo-ethoxy]-4-methyl-2-oxo-chromen-3-yl)propanoate (**Scaff10-42**) (30 mg, 0.06 mmol) was saponificated in a mixture of 1.5 ml DMF and 1.5 ml 1 M sodium hydroxide at 70 °C for 0.5 h. The product was purified using preparative HPLC. The final product after lyophilisation as white solid in 25 % yield (28 mg).

$^1\text{H}$  NMR (300 MHz, DMSO- $d_6$ ):  $\delta$ (ppm) = 1.90 – 2.04 (t,  $J$  = 7.33 Hz, 2H,  $-\text{CH}_2-\text{CH}_2-\text{COOH}$ ), 2.32 – 2.43 (s, 3H, Ar- $\text{CH}_3$ ), 2.61 – 2.74 (t,  $J$  = 7.33 Hz, 2H,  $-\text{CH}_2-\text{CH}_2-\text{COOH}$ ), 3.87 – 3.97 (s, 3H,  $-\text{OCH}_3$ ), 5.75 – 5.86 (s, 2H,  $-\text{CO}-\text{CH}_2-\text{OAr}$ ), 6.97 – 7.09 (m, 2H, H-6, -8), 7.25 – 7.33 (m, 1H, H-5), 7.41 – 7.47 (s, 1H, H-5'), 7.63 – 7.71 (d,  $J$  = 8.55 Hz, 1H, H-7'), 7.90 – 8.08 (m, 3H, H-3', -4', -8'), 8.68 – 8.74 (s, 1H, H-1')

ESI-MS: cal. 447.14, exp. 447.1 ( $[\text{M}+\text{H}]^+$ )

HPLC: 99 % purity at 254 nm

$t_{\text{R}}$  (HPLC): 6.25 min;  $\lambda_{\text{max}}$  = 261 nm and 320 nm

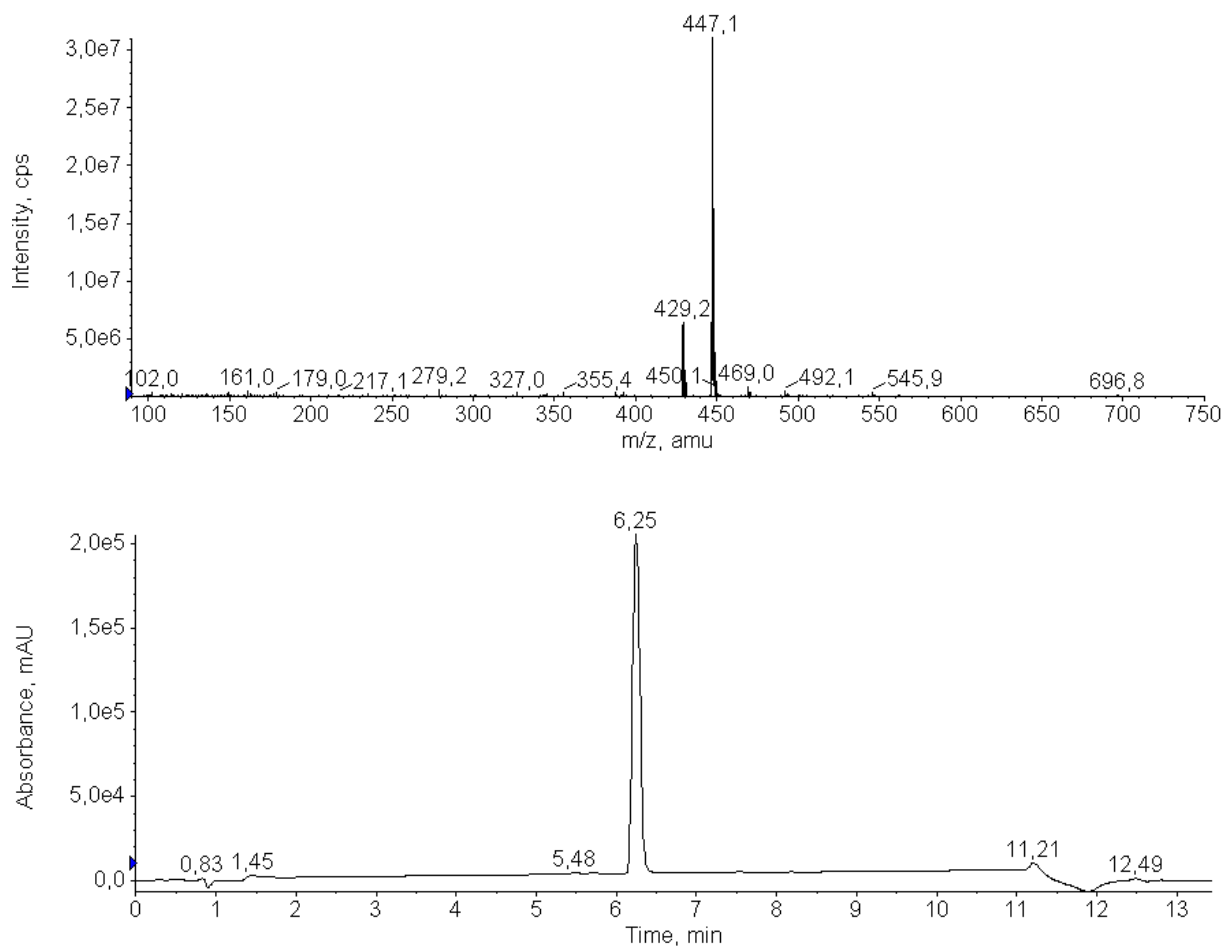

**Supporting Information Figure 68:** LC/MS analysis of **Scaff10-43**. Upper panel: Mass spectrum. Lower panel: according chromatogram.

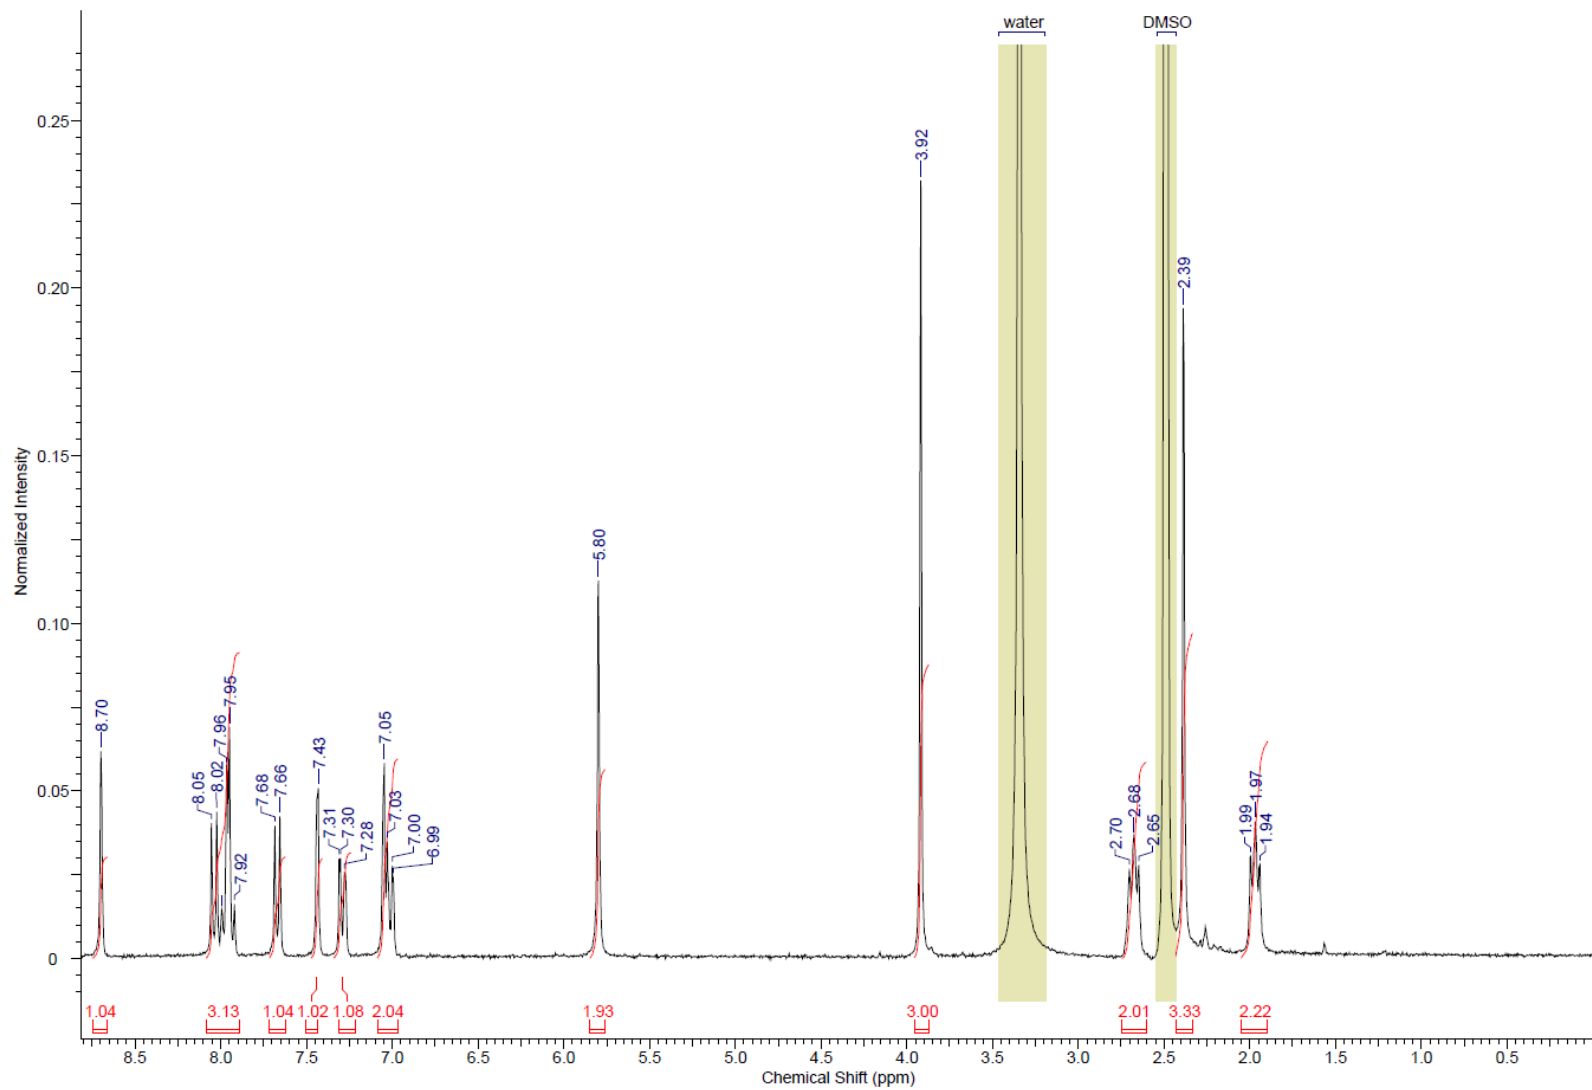

Supporting Information Figure 69: <sup>1</sup>H NMR spectrum of Scaff10-43, 300 MHz, DMSO-d<sub>6</sub>.

4.1.39 3-[7-Methoxy-6-[1-(6-methoxy-2-naphthyl)vinyl]-4-methyl-2-oxo-chromen-3-yl]propanoic acid  
(Scaff10-44)

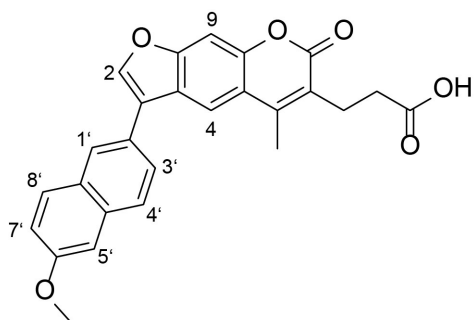

Ethyl 3-(7-[2-(6-methoxy-2-naphthyl)-2-oxo-ethoxy]-4-methyl-2-oxo-chromen-3-yl)propanoate (Scaff10-42) (10 mg, 0.02 mmol) was saponificated in a mixture of 0.3 ml DMF and 0.5 ml 2 M sodium hydroxide at 80 °C for 0.75 h. The final product after purification gave a yellowish solid in 51 % yield (4 mg).

$^1\text{H NMR}$  (300 MHz,  $\text{DMSO-d}_6$ ):  $\delta$ (ppm) = 1.95 – 2.07 (t,  $J = 8.55$  Hz, 2H,  $-\text{CH}_2-\text{CH}_2-\text{COOH}$ ), 2.54 – 2.62 (s, 3H, Ar- $\text{CH}_3$ ), 2.69 – 2.82 (t,  $J = 8.55$  Hz, 2H,  $-\text{CH}_2-\text{CH}_2-\text{COOH}$ ), 3.86 – 3.94 (s, 3H,  $-\text{OCH}_3$ ), 7.19 – 7.25 (dd,  $J = 2.44$  Hz, 9.77 Hz, 1H, H-7'), 7.36 – 7.40 (d,  $J = 2.44$  Hz, 1H, H-5'), 7.73 – 7.76 (s, 1H, H-9'), 7.83 – 7.89 (d,  $J = 9.77$  Hz, 1H, H-8'), 7.93 – 8.02 (m, 2H, H-3', -1'), 8.21 – 8.32 (m, 2H, H-4, -4'), 8.50 – 8.53 (s, 1H, H-2)

ESI-MS: cal. 429.13, exp. 429.1 ( $[\text{M}+\text{H}]^+$ )

HPLC: 96 % purity at 254 nm

$t_R$  (HPLC): 7.15 min;  $\lambda_{\text{max}} = 308$  nm



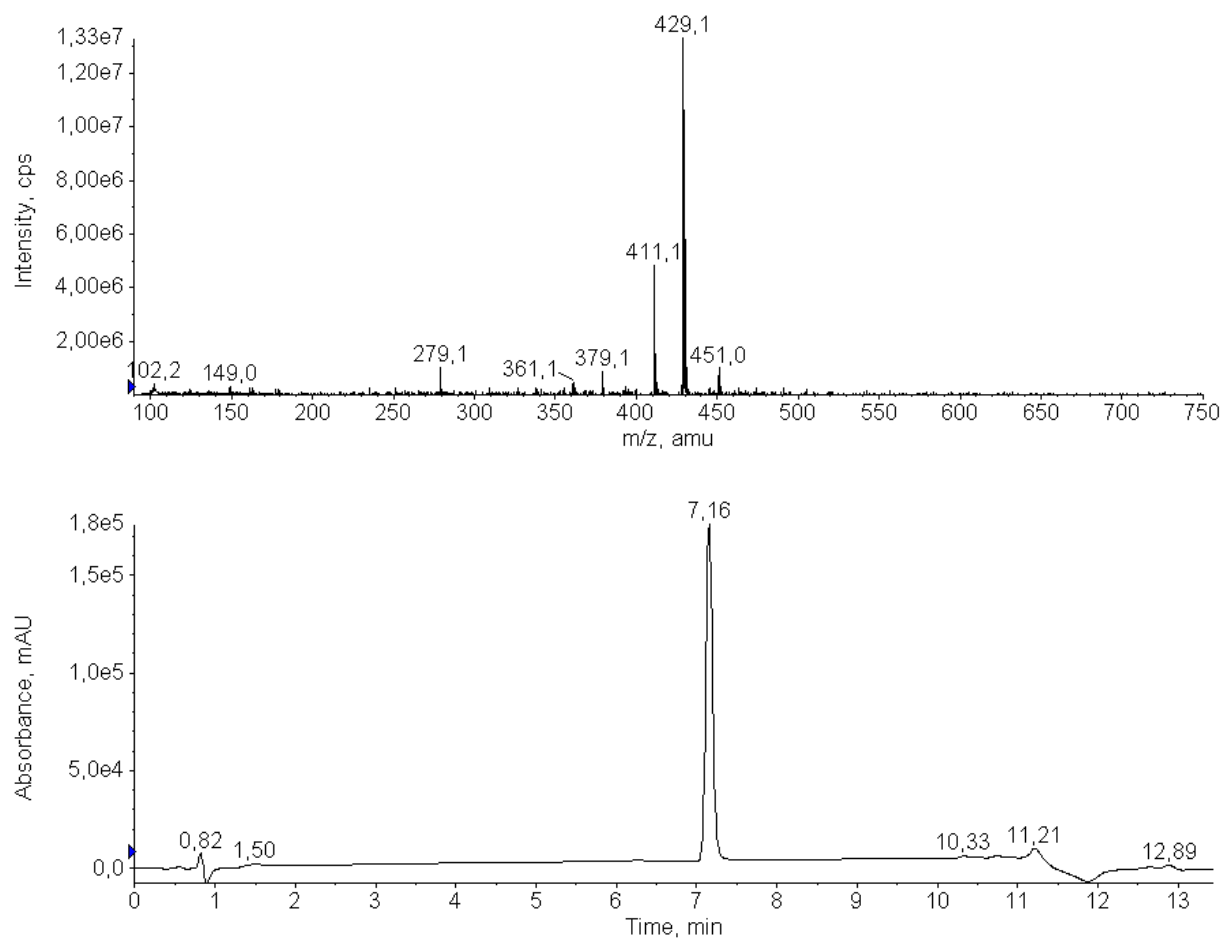

**Supporting Information Figure 70:** LC/MS analysis of **Scaff10-44**. Upper panel: Mass spectrum. Lower panel: according chromatogram.

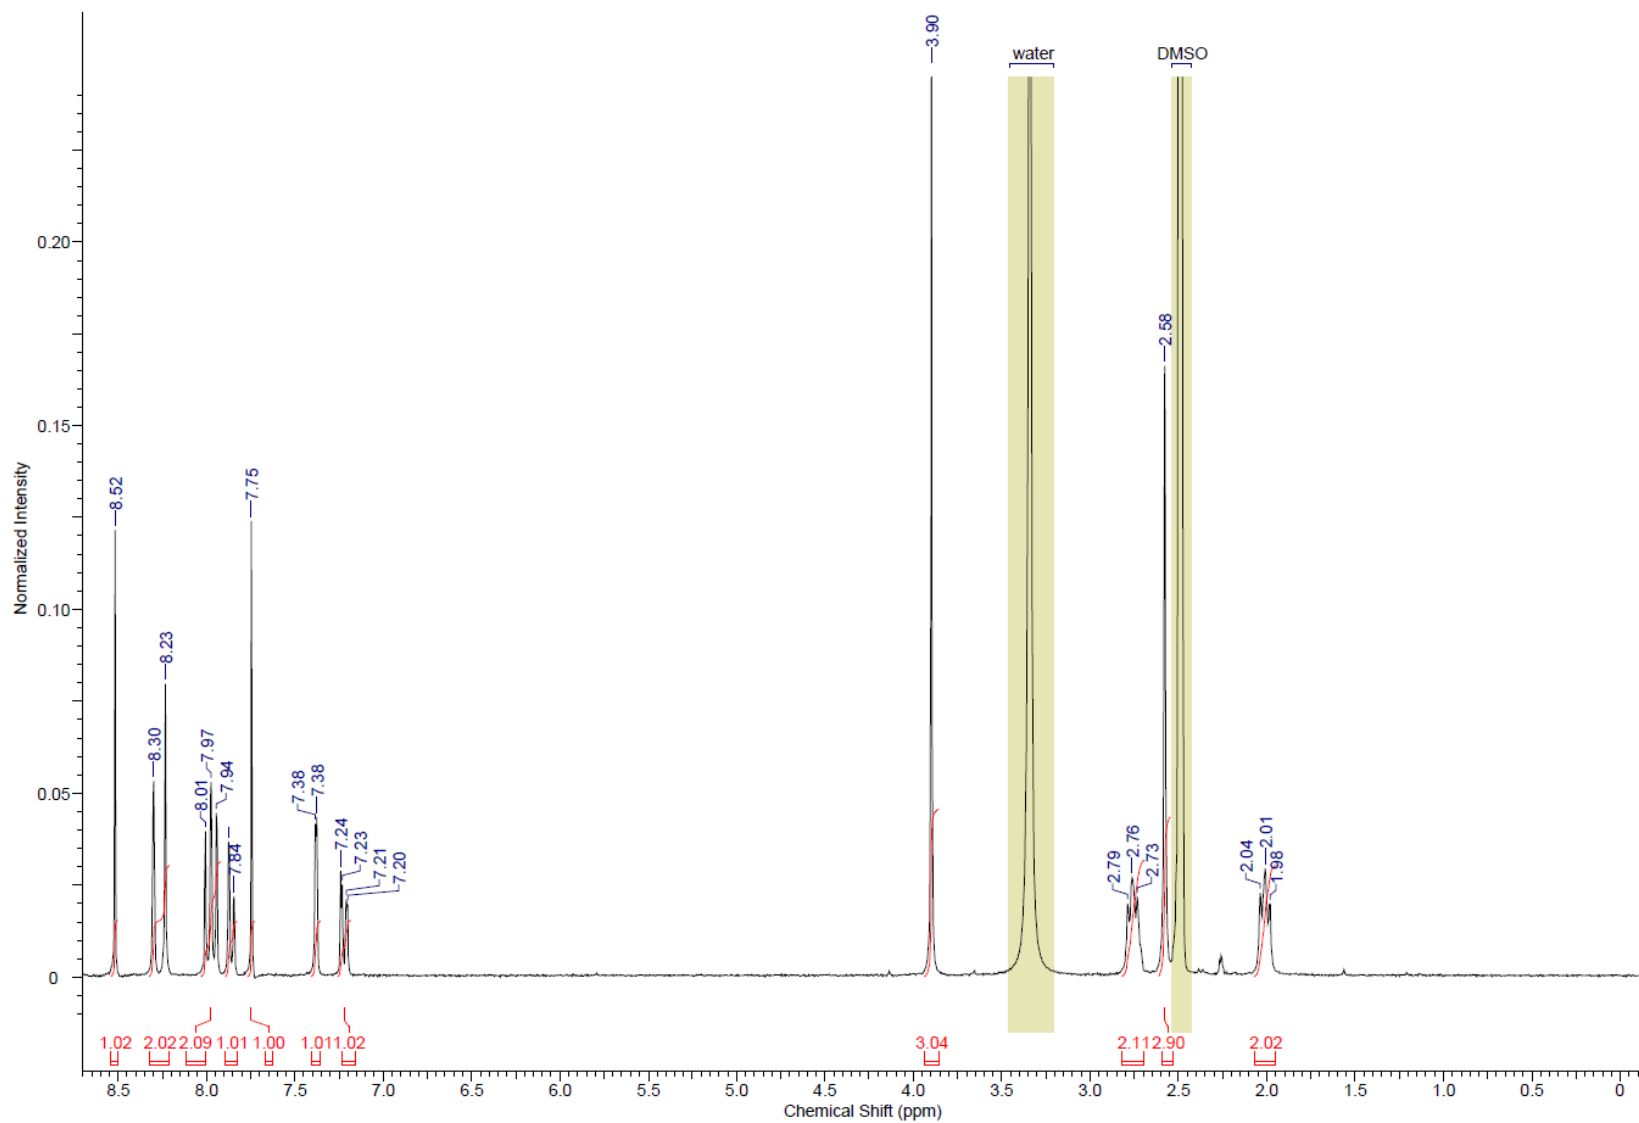

Supporting Information Figure 71: <sup>1</sup>H NMR spectrum of Scaff10-44, 300 MHz, DMSO-d<sub>6</sub>.

4.1.40 3-[3-[6-(4-Fluorophenyl)-2-methyl-3-pyridyl]-5-methyl-7-oxo-furo[3,2-*g*]chromen-6-yl]propanoic acid (**Scaff10-45**)

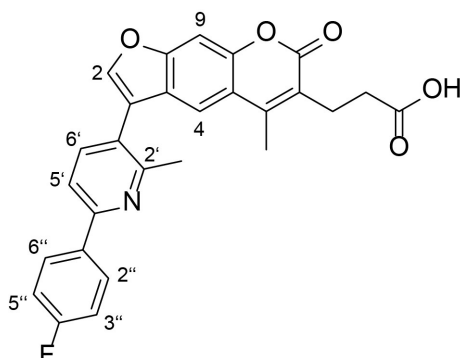

3-[7-[2-[6-(4-Fluorophenyl)-2-methyl-3-pyridyl]-2-oxo-ethoxy]-4-methyl-2-oxo-chromen-3-yl]propanoate (**Scaff10-10**) (170 mg, 0.34 mmol) was saponificated in a mixture of 7 ml dry acetone and 7 ml 1 M sodium hydroxide at 95 °C for 6.5 h. Dropwise addition of 1 M HCl resulted in precipitation of the product. The precipitated solid was filtered and recrystallised in ethanol. The final product gave an ivory white solid in 24 % yield (35 mg).

$^1\text{H NMR}$  (300 MHz,  $\text{DMSO-d}_6$ ):  $\delta$ (ppm) = 1.90 – 2.11 (m, 2H,  $-\text{CH}_2-\text{CH}_2-\text{COOH}$ ), 2.45 – 2.53 (s, 3H,  $-\text{C}2'-\text{CH}_3$ ), 2.59 – 2.69 (s, 3H, Ar- $\text{CH}_3$ ), 2.69 – 2.91 (m, 2H,  $-\text{CH}_2-\text{CH}_2-\text{COOH}$ ), 7.28 – 7.46 (t,  $J = 8.54$  Hz, 2H, H-3'', -5''), 7.74 – 7.82 (s, 1H, H-9), 7.83 – 7.91 (s, 1H, H-4), 7.91 – 8.07 (m, 2H, H-5', -6'), 8.16 – 8.33 (m, 2H, H-2'', -6''), 8.33 – 8.45 (s, 1H, H-2)

ESI-MS: cal. 458.14, exp. 458.1 ( $[\text{M}+\text{H}]^+$ )

HPLC: 99 % purity at 254 nm

$t_R$  (HPLC): 6.24 min;  $\lambda_{\text{max}} = 246$  nm and 300 nm

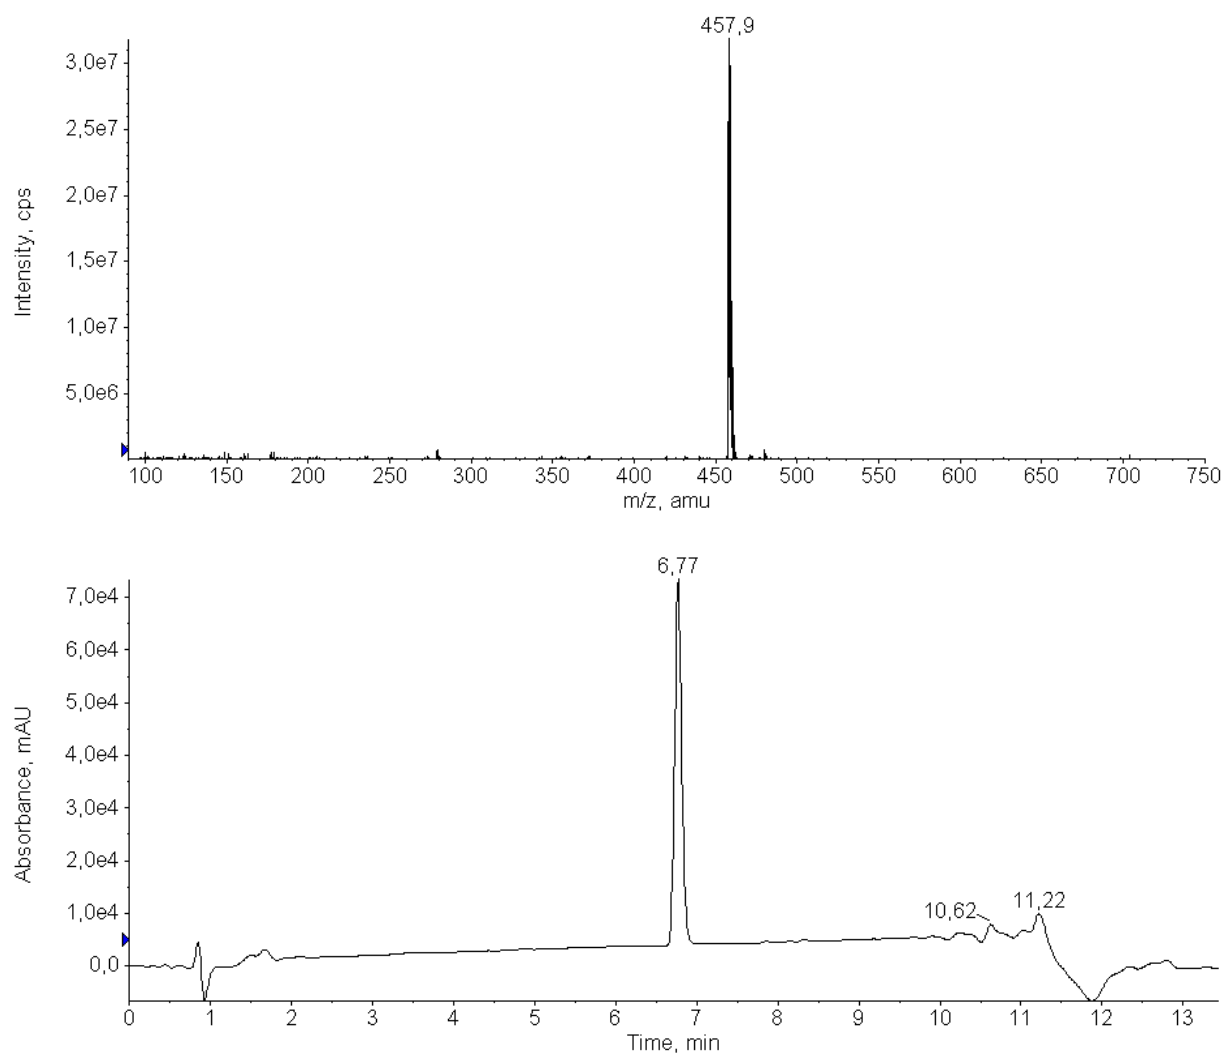

**Supporting Information Figure 72:** LC/MS analysis of **Scaff10-45**. Upper panel: Mass spectrum. Lower panel: according chromatogram.

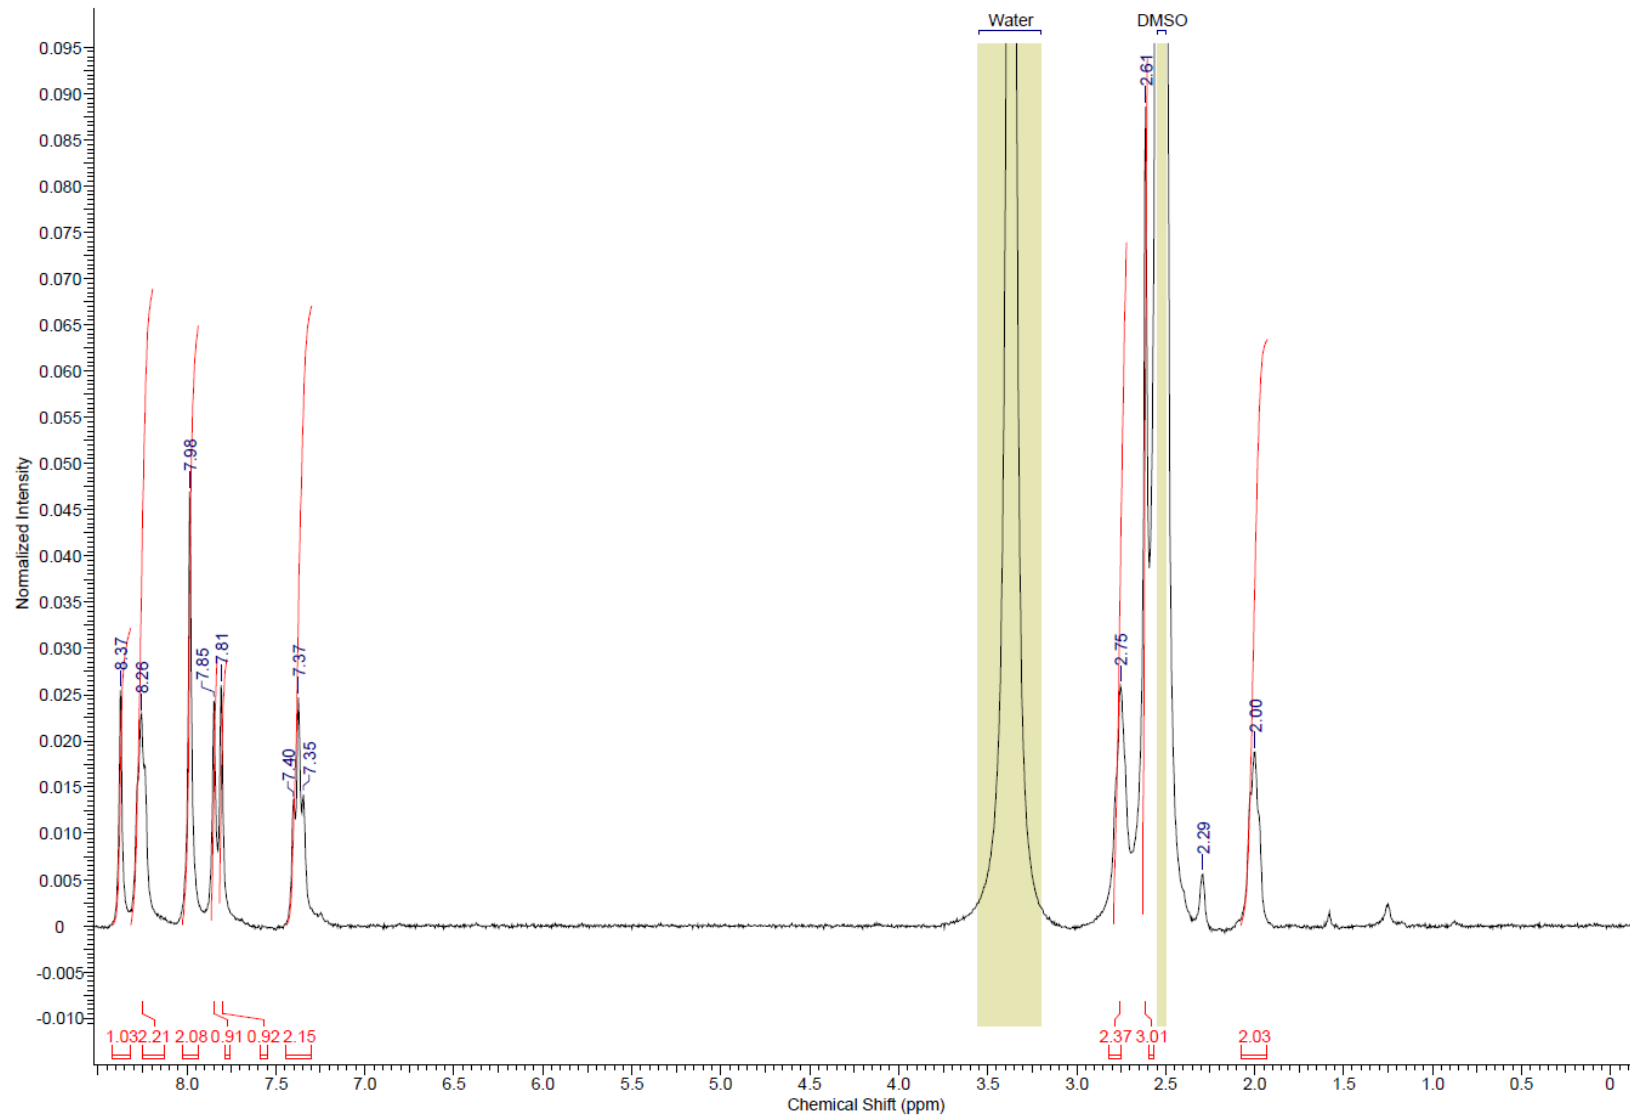

Supporting Information Figure 73: <sup>1</sup>H NMR spectrum of Scaff10-45, 300 MHz, DMSO-d<sub>6</sub>.

4.1.41 5,6-Dimethyl-3-(4-phenylphenyl)furo[3,2-g]chromen-7-one (**Scaff10-46**)

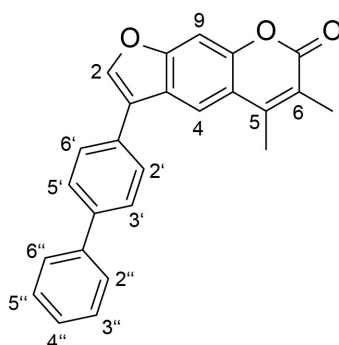

3,4-Dimethyl-7-[2-oxo-2-(4-phenylphenyl)ethoxy]chromen-2-one (**Scaff10-13**) (50 mg, 0.13 mmol) was saponificated in a mixture of 5 ml ethanol, 5 ml isopropyl alcohol and 2 ml 1 M sodium hydroxide at 70 °C for 3 h. Crystals precipitated at 4 °C overnight. The final product gave yellowish crystals in 25 % yield (12 mg).

$^1\text{H NMR}$  (300 MHz,  $\text{DMSO-d}_6$ ):  $\delta(\text{ppm}) = 2.10 - 2.16$  (s, 3H,  $-\text{C}_6\text{-CH}_3$ ),  $2.55 - 2.67$  (s, 3H,  $-\text{C}_5\text{-CH}_3$ ),  $7.37 - 7.47$  (t,  $J = 7.32$  Hz, 1H, H-4''),  $7.47 - 7.59$  (t,  $J = 7.32$  Hz, 2H, H-3'', -5''),  $7.71 - 7.83$  (m, 3H, H-9, -2'', -6''),  $7.83 - 7.90$  (d,  $J = 7.32$  Hz, 2H, H-2', -6'),  $7.90 - 7.99$  (d,  $J = 7.32$  Hz, 2H, H-3', -5'),  $8.18 - 8.26$  (s, 1H, H-4),  $8.51 - 8.58$  (s, 1H, H-2)

ESI-MS: cal. 367.13, exp. 367.1 ( $[\text{M}+\text{H}]^+$ )

HPLC: 99 % purity at 254 nm

$t_{\text{R}}$  (HPLC): 8.94 min;  $\lambda_{\text{max}} = 263$  nm and 306 nm

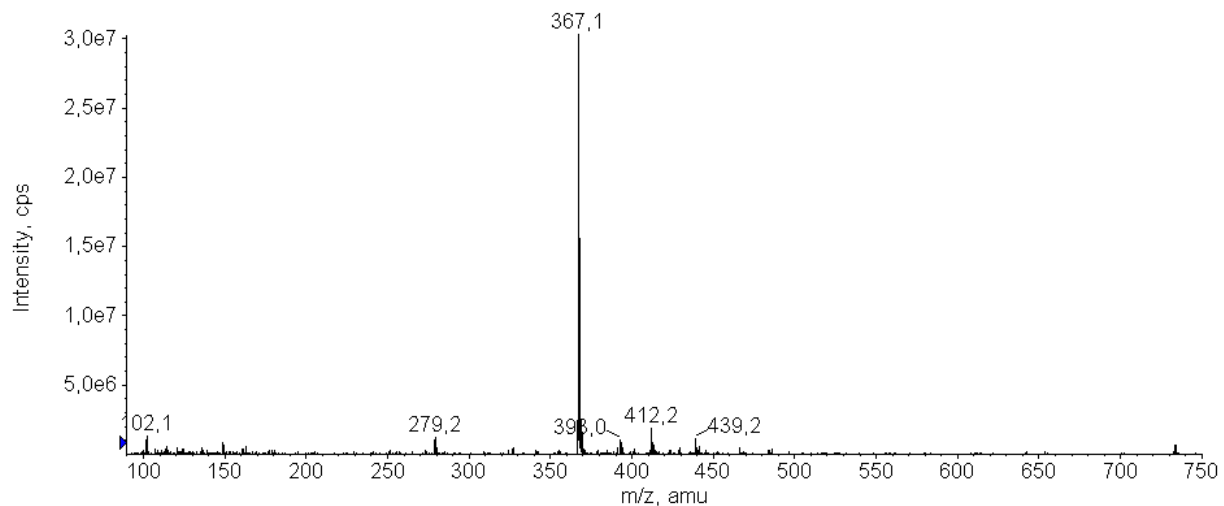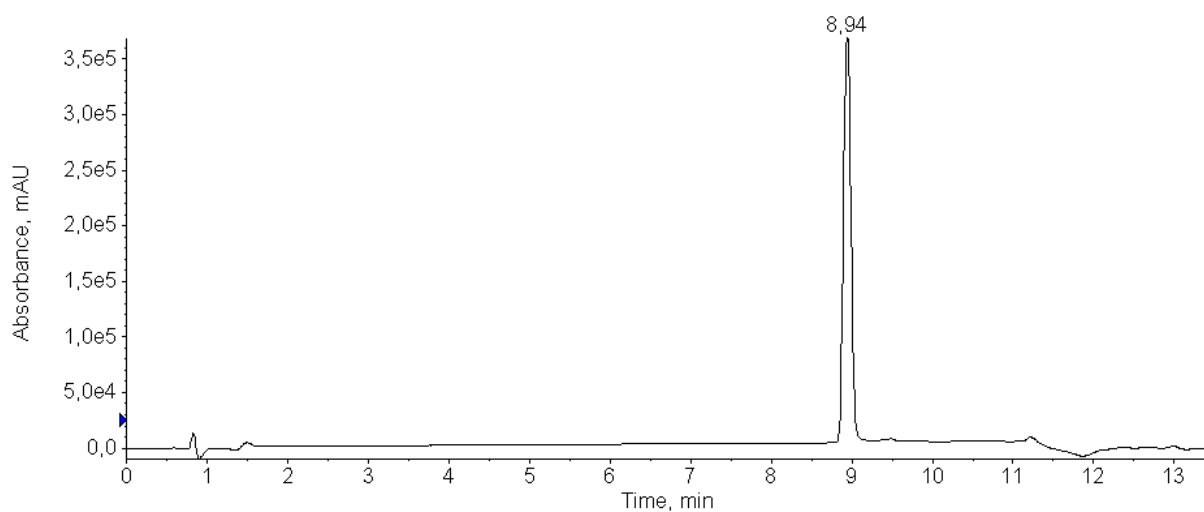

**Supporting Information Figure 74:** LC/MS analysis of **Scaff10-46**. Upper panel: Mass spectrum. Lower panel: according chromatogram.

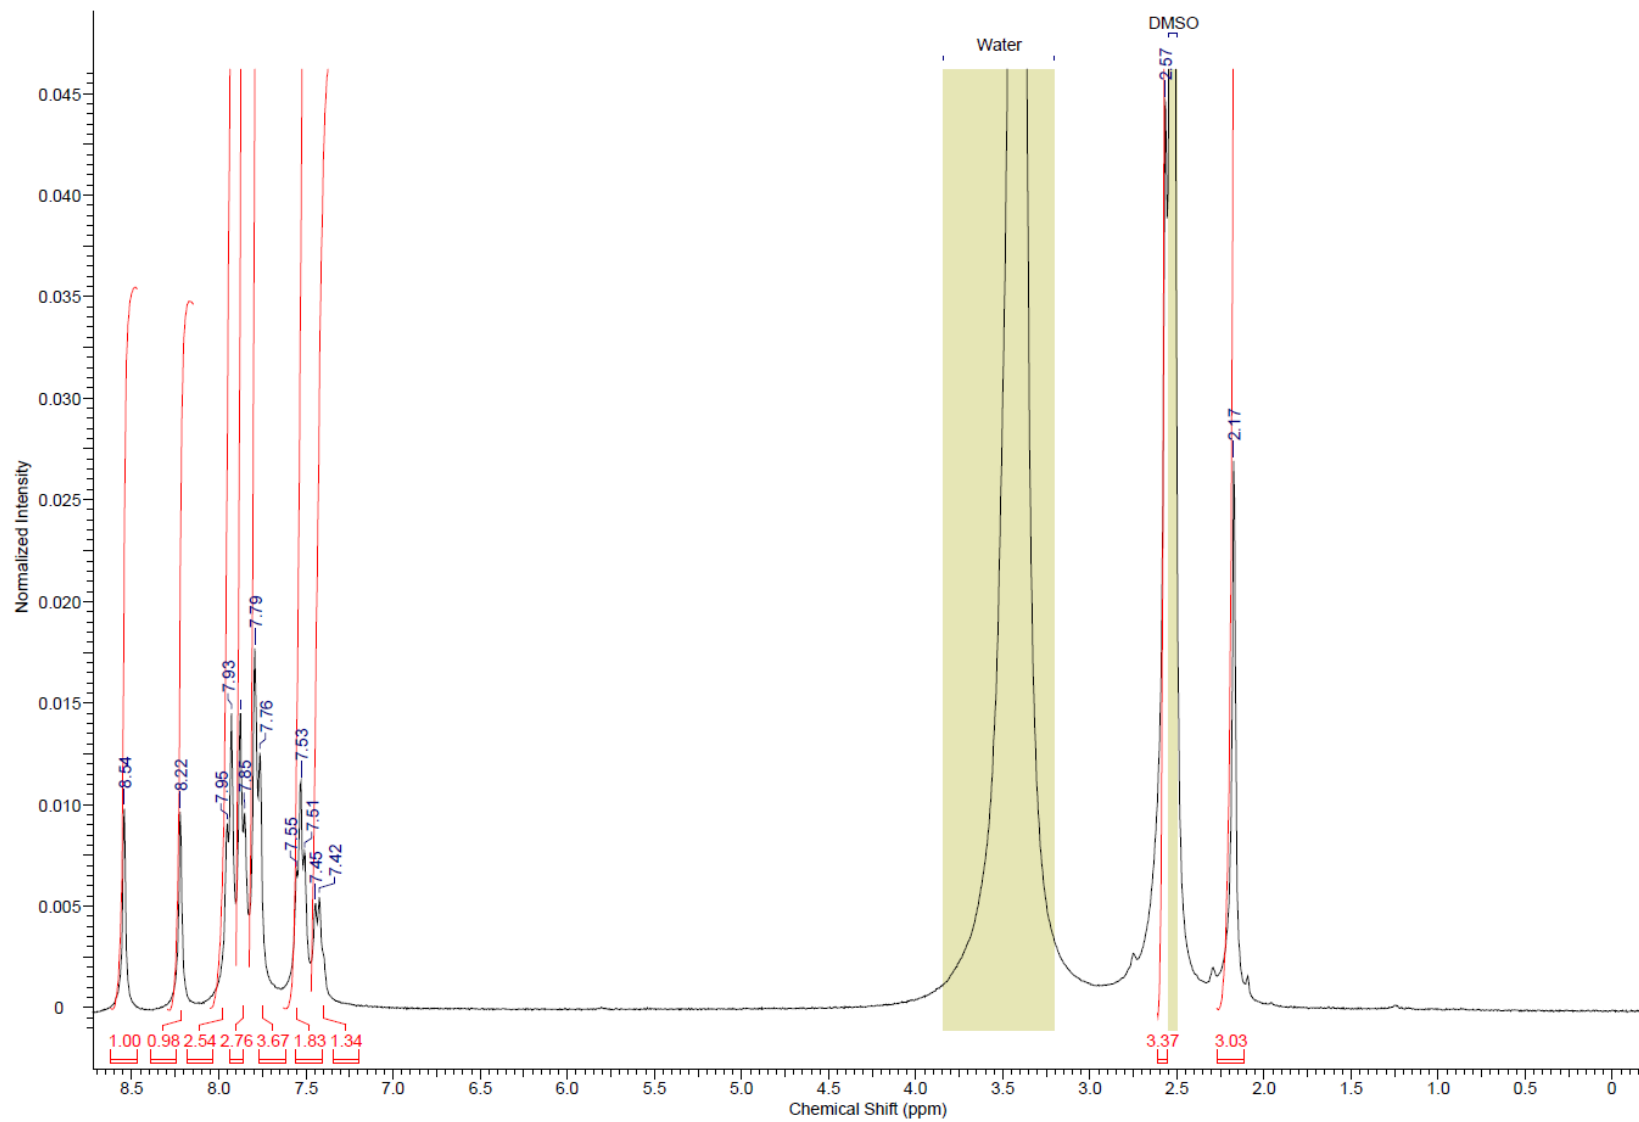

Supporting Information Figure 75: <sup>1</sup>H NMR spectrum of Scaff10-46, 300 MHz, DMSO-d<sub>6</sub>.



4.1.42 3-(6-Methoxy-2-naphthyl)-5,6-dimethyl-furo[3,2-g]chromen-7-one (**Scaff10-47**)

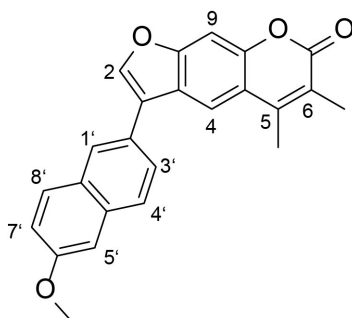

7-[2-(6-Methoxy-2-naphthyl)-2-oxo-ethoxy]-3,4-dimethyl-chromen-2-one (**Scaff10-15**) (5 mg, 0.01 mmol) was saponificated in a mixture of 0.5 ml DMSO and 0.5 ml 2 M sodium hydroxide at 70 °C. The final product after purification gave yellowish crystals.

$^1\text{H}$  NMR (300 MHz, DMSO- $d_6$ ):  $\delta$ (ppm) = 2.12 – 2.20 (s, 3H, -C6-CH $_3$ ), 2.53 – 2.59 (s, 3H, -C5-CH $_3$ ), 3.87 – 3.94 (s, 3H, -OCH $_3$ ), 7.19 – 7.26 (dd, J = 2.44 Hz, 8.55 Hz, 1H, H-7'), 7.37 – 7.40 (d, J = 2.44 Hz, 1H, H-5'), 7.76 – 7.80 (s, 1H, H-9), 7.84 – 7.90 (d, J = 8.55 Hz, 1H, H-8'), 7.93 – 8.03 (m, 2H, H-1', -3'), 8.25 – 8.33 (m, 2H, H-4, -4'), 8.52 – 8.55 (s, 1H, H-2)

ESI-MS: cal. 371.12, exp. 371.1 ([M+H] $^+$ )

HPLC: 99 % purity at 254 nm

$t_R$  (HPLC): 8.46 min;  $\lambda_{\text{max}}$  = 307 nm

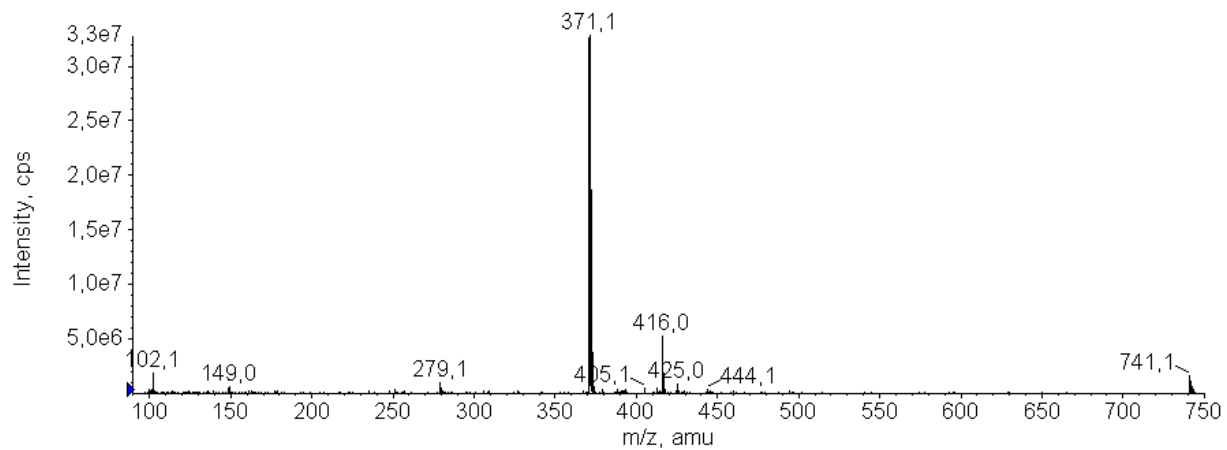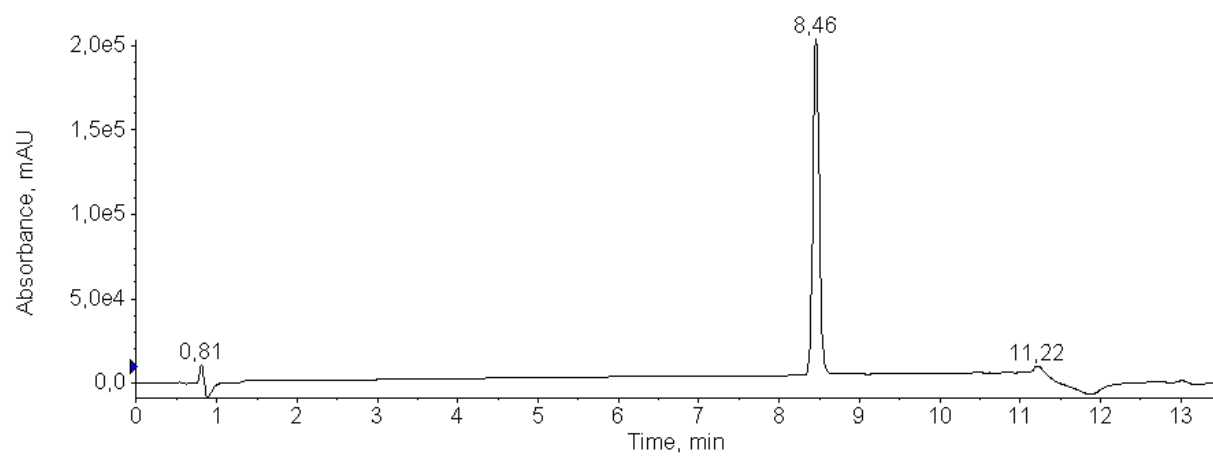

**Supporting Information Figure 76:** LC/MS analysis of **Scaff10-47**. Upper panel: Mass spectrum. Lower panel: according chromatogram.

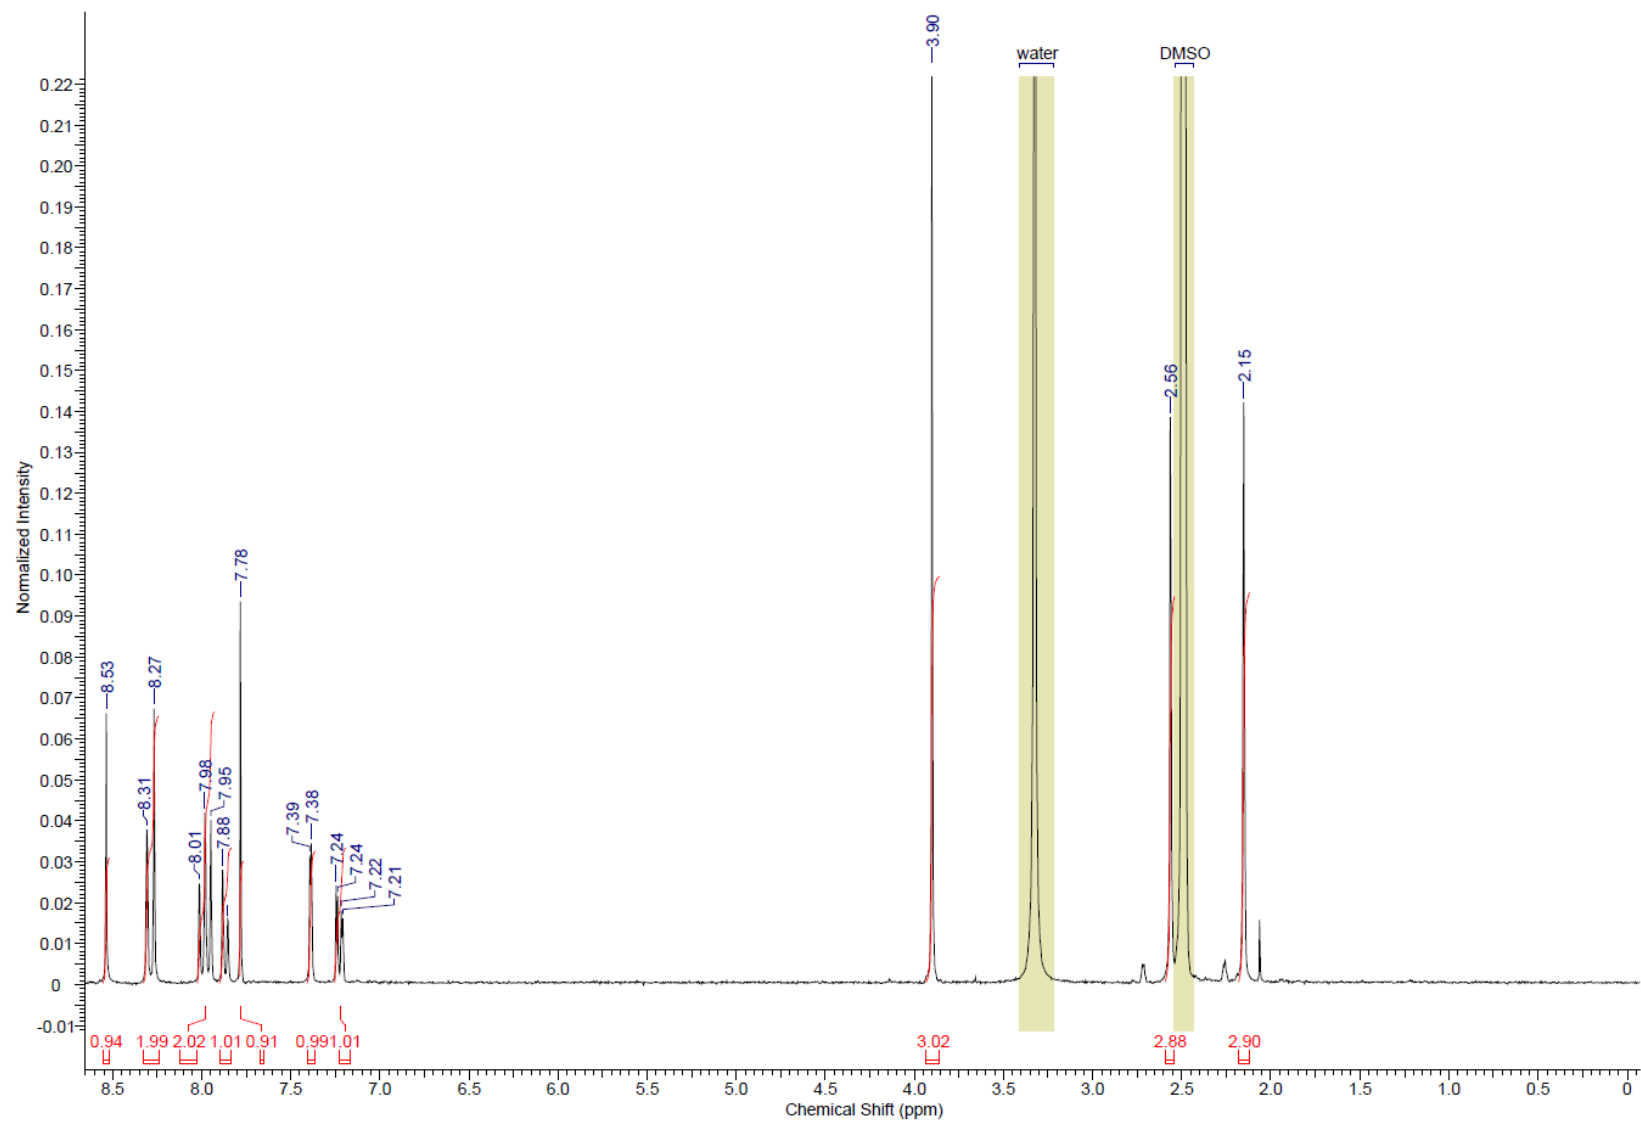

Supporting Information Figure 77: <sup>1</sup>H NMR spectrum of Scaff10-47, 300 MHz, DMSO-d<sub>6</sub>.

4.1.43 Methyl 3-[3-(4-methoxyphenyl)-5-methyl-7-oxo-furo[3,2-g]chromen-6-yl]propanoate (**Scaff10-48**)

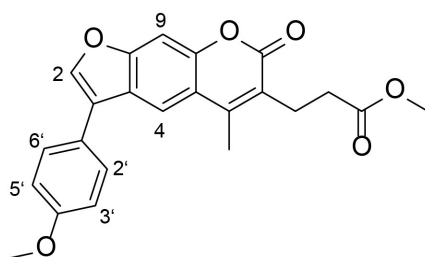

3-[3-(4-Methoxyphenyl)-5-methyl-7-oxo-furo[3,2-g]chromen-6-yl]propanoic acid (**Scaff10-8**) (38 mg, 0.10 mmol) was esterified in a mixture of 2 ml methanol and 0.5 ml 1 M H<sub>2</sub>SO<sub>4</sub> at 80 °C for 2.5 h. The precipitated solid was recrystallised in ethanol. The final product gave an orange-yellowish solid in 15 % yield (6 mg).

<sup>1</sup>H NMR (300 MHz, DMSO-d<sub>6</sub>): δ(ppm) = 2.49 - 2.55 (t, J = 7.32 Hz, 2H, -CH<sub>2</sub>-CH<sub>2</sub>-COOCH<sub>3</sub>), 2.54 - 2.59 (s, 3H, Ar-CH<sub>3</sub>), 2.84 - 2.94 (t, J = 7.32 Hz, 2H, -CH<sub>2</sub>-CH<sub>2</sub>-COOCH<sub>3</sub>), 3.55 - 3.64 (s, 3H, -COOCH<sub>3</sub>), 3.80 - 3.86 (s, 3H, -OCH<sub>3</sub>), 7.06 - 7.14 (d, J = 8.54 Hz, 2H, H-3', -5'), 7.71 - 7.79 (m, 3H, H-7, -2', -6'), 8.11 - 8.17 (s, 1H, H-4), 8.35 - 8.40 (s, 1H, H-2)

ESI-MS: cal. 393.13, exp. 393.1 ([M+H]<sup>+</sup>)

HPLC: 98 % purity at 254 nm

t<sub>R</sub> (HPLC): 7.20 min; λ<sub>max</sub> = 248 nm and 306 nm

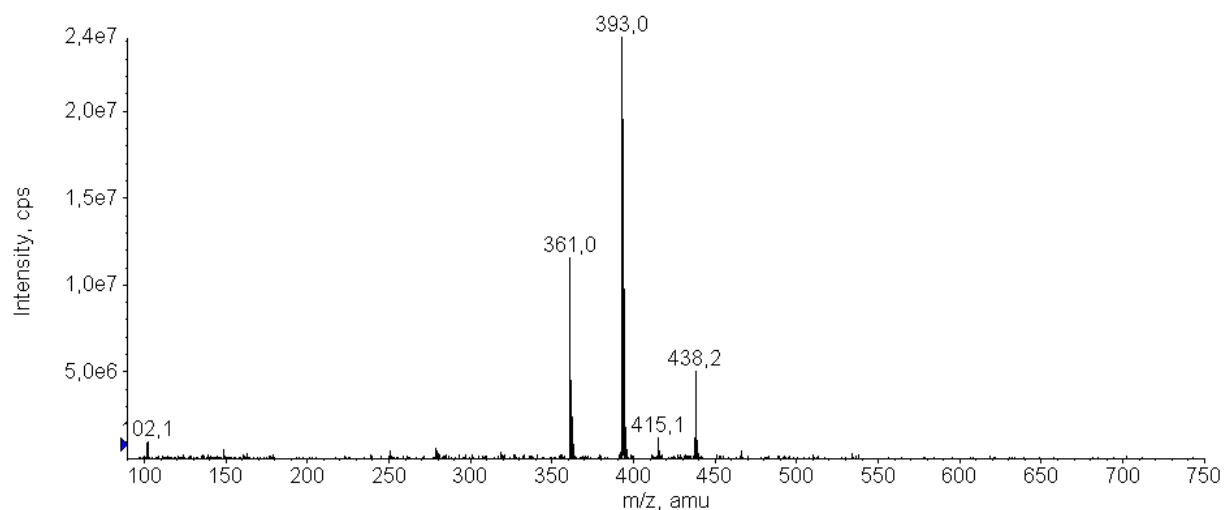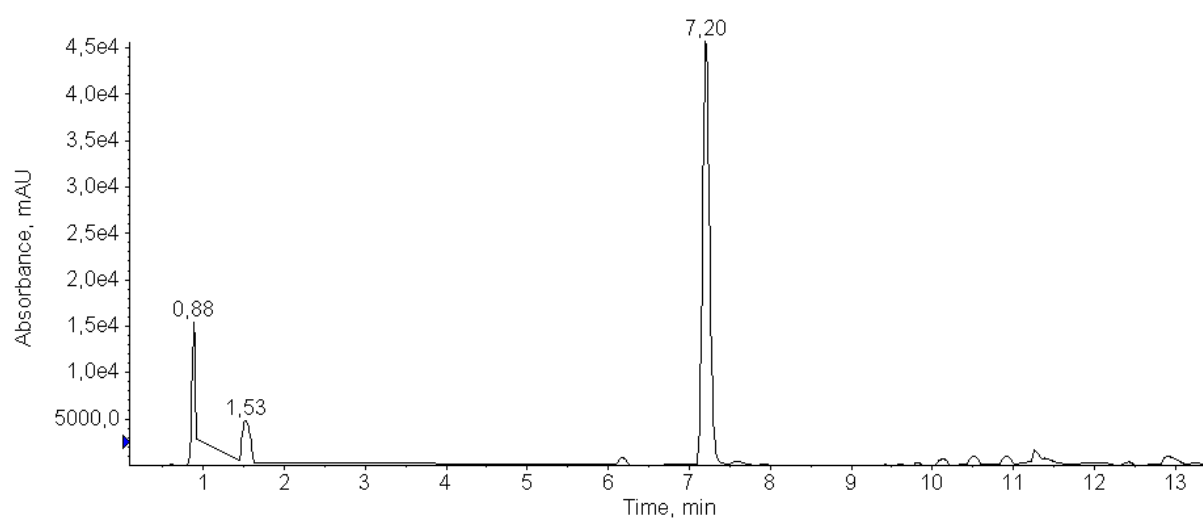

**Supporting Information Figure 78:** LC/MS analysis of **Scaff10-48**. Upper panel: Mass spectrum. Lower panel: according chromatogram.

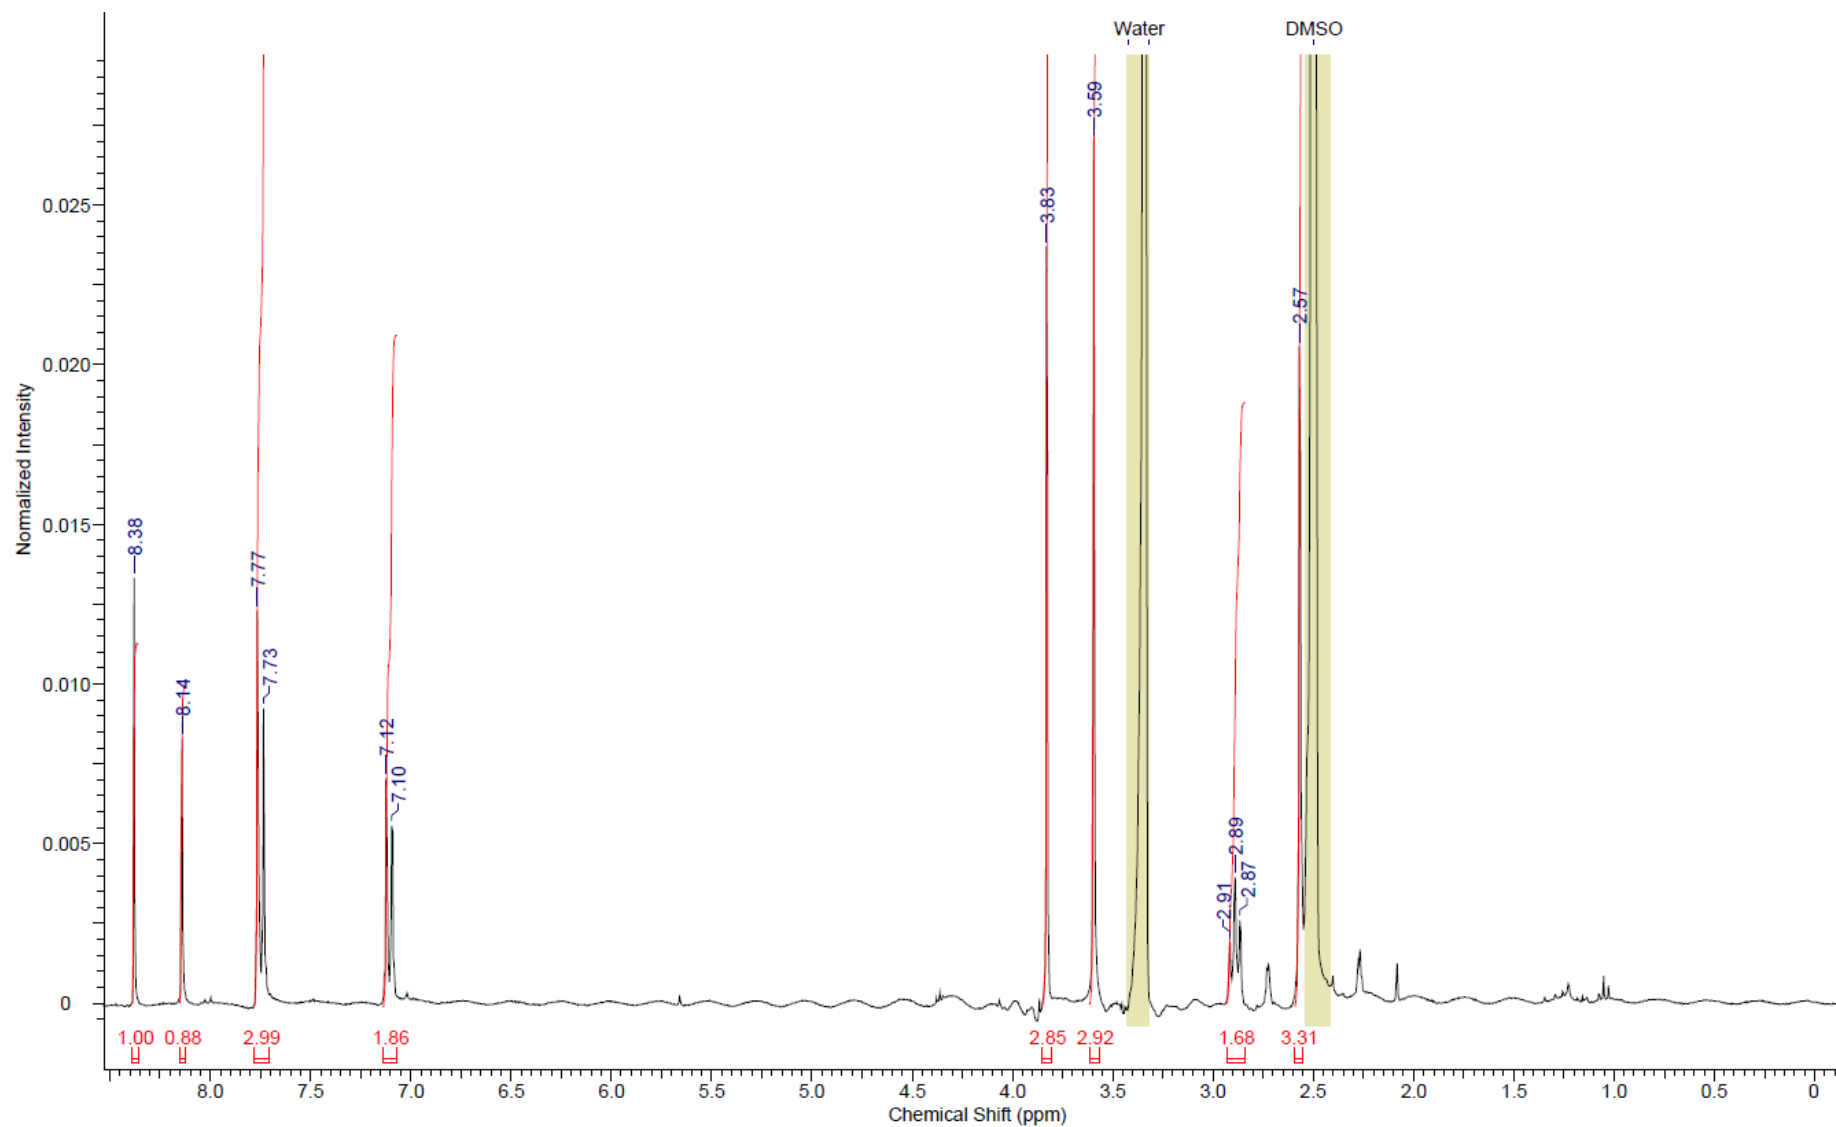

Supporting Information Figure 79: <sup>1</sup>H NMR spectrum of **Scaff10-48**, 300 MHz, DMSO-d<sub>6</sub>.

4.1.44 3-[3-(4-Methoxyphenyl)-5-methyl-7-oxo-furo[3,2-g]chromen-6-yl]propanehydroxamic acid (**Scaff10-51**)

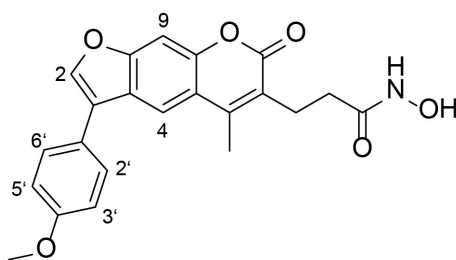

3-[3-(4-Methoxyphenyl)-5-methyl-7-oxo-furo[3,2-g]chromen-6-yl]propanoic acid (**Scaff10-8**) (60 mg, 0.16 mmol) was solved in 3 ml DMF and incubated with *N,N,N',N'*-tetramethylfluoroformamidinium hexafluorophosphate (TFFH) (63 mg, 0.24 mmol) and TEA (48 mg, 0.48 mmol) for 5 min at 25 °C. A mixture of hydroxylamine (33 mg, 0.48 mmol), TEA (48 mg, 0.48 mmol) and 0.5 ml water was added. After 16 h at 25 °C, the precipitate was purified using preparative HPLC with the following gradient: 10 % to 90 % ACN in H<sub>2</sub>O in 80 min. The product eluted at  $t_R = 47$  min and was obtained after lyophilisation. An detection for hydroxamic acids was performed using iron(III)chloride in a solution of water and ethanol (1:1). Addition of Scaff10-51 resulted in the characteristic red colour of the complex formed by iron(III) and hydroxamic acids. The final product gave a yellowish solid in 6 % yield (3 mg).

<sup>1</sup>H NMR (300 MHz, DMSO-d<sub>6</sub>):  $\delta$ (ppm) = 2.13 - 2.25 (t, J = 7.32 Hz, 2H, -CH<sub>2</sub>-CH<sub>2</sub>-CONHOH), 2.53 - 2.59 (s, 3H, Ar-CH<sub>3</sub>), 2.77 - 2.91 (t, J = 7.32 Hz, 2H, -CH<sub>2</sub>-CH<sub>2</sub>-CONHOH), 3.78 - 3.89 (s, 3H, -OCH<sub>3</sub>), 7.07 - 7.17 (d, J = 8.54 Hz, 2H, H-3', -5'), 7.70 - 7.80 (m, 3H, H-9, -2', -6'), 8.11 - 8.17 (s, 1H, H-4), 8.36 - 8.40 (s, 1H, H-2), 8.68 - 8.74 (s, 1H, -NH-OH), 10.41 - 10.46 (s, 1H, -NH-OH)

ESI-MS: cal. 394.12, exp. 394.1 ([M+H]<sup>+</sup>)

HPLC: 98 % purity at 254 nm

$t_R$  (HPLC): 5.42 min;  $\lambda_{max} = 250$  nm and 307 nm

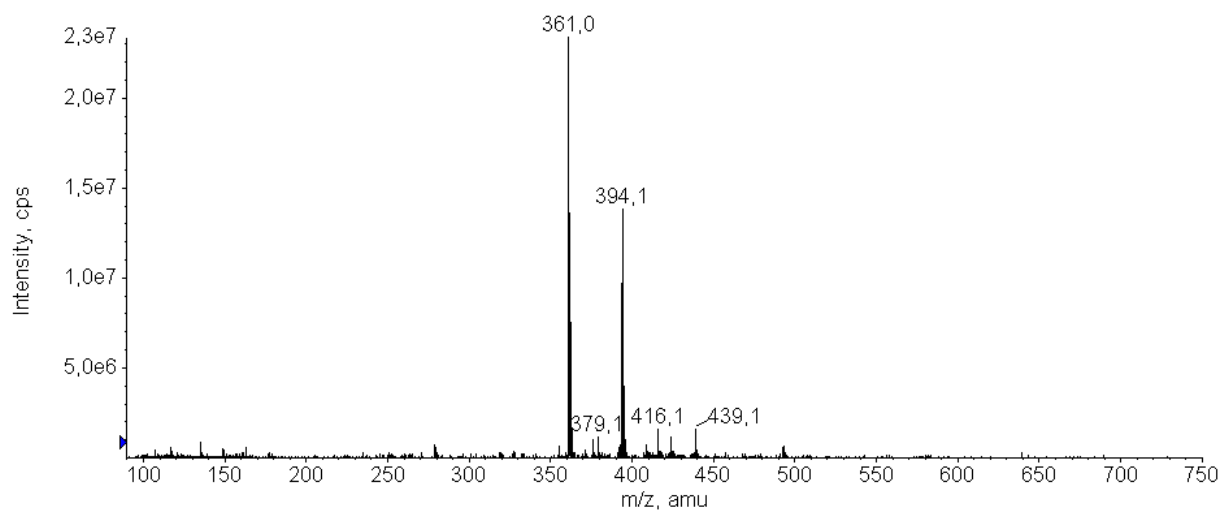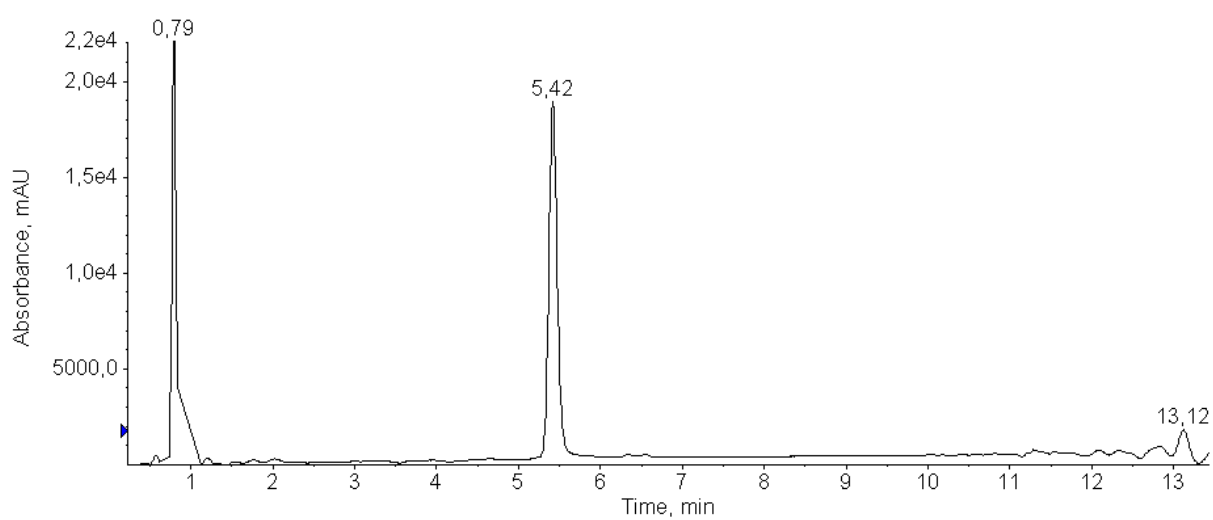

**Supporting Information Figure 80:** LC/MS analysis of **Scaff10-51**. Upper panel: Mass spectrum. Lower panel: according chromatogram.



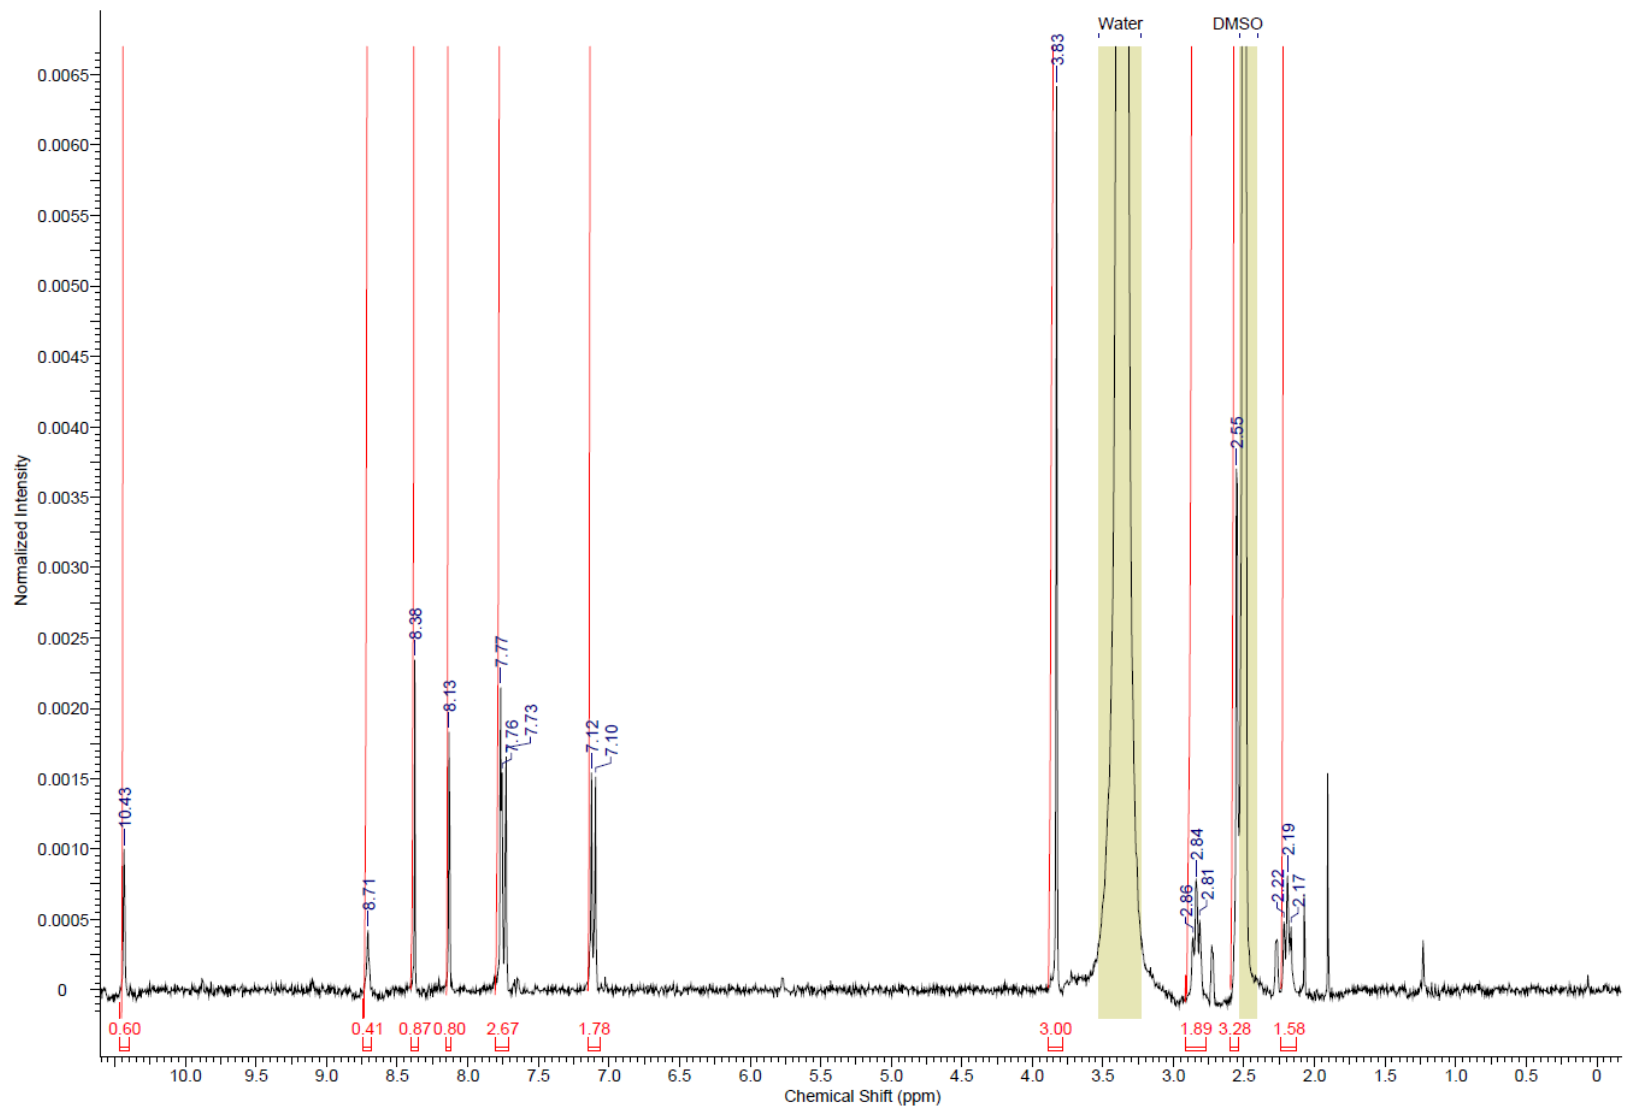

Supporting Information Figure 81: <sup>1</sup>H NMR spectrum of Scaff10-51, 300 MHz, DMSO-d<sub>6</sub>.

4.1.45 Ethyl 3-[7-[2-(4-hydroxyphenyl)-2-oxo-ethoxy]-4-methyl-2-oxo-chromen-3-yl]propanoate (**Scaff10-52**)

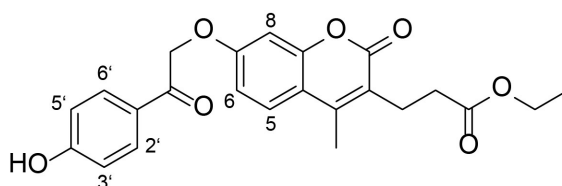

Ethyl 3-(7-hydroxy-4-methyl-2-oxo-chromen-3-yl)propanoate (**5a**) (50 mg, 0.18 mmol) was solved in acetone and preactivated with potash in excess (62 mg, 0.45 mmol) by 55 °C. The  $\alpha$ -haloketone 2-bromo-1-(4-hydroxyphenyl)ethanone (**21**) was added (39 mg, 0.18 mmol). The mixture was refluxed at the same temperature for 4 h. The products Scaff10-52 and Scaff10-52d were purified using preparative HPLC. The final product after purification gave a yellowish solid.

$^1\text{H}$  NMR (300 MHz, DMSO- $d_6$ ):  $\delta$ (ppm) = 1.09 – 1.19 (t, J = 7.33 Hz, 3H,  $-\text{CH}_2-\text{CH}_3$ ), 2.34 – 2.41 (s, 3H, Ar- $\text{CH}_3$ ), 2.41 – 2.50 (t, J = 7.33 Hz, 2H,  $-\text{CH}_2-\text{CH}_2-\text{COOEt}$ ), 2.74 – 2.84 (t, J = 7.33 Hz, 2H,  $-\text{CH}_2-\text{CH}_2-\text{COOEt}$ ), 3.96 – 4.08 (q, J = 7.33 Hz, 2H,  $-\text{CH}_2-\text{CH}_3$ ), 5.39 – 5.49 (s, 2H,  $-\text{CO}-\text{CH}_2-\text{OAr}$ ), 6.43 – 6.50 (d, J = 8.55 Hz, 2H, H-3', -5'), 6.90 – 6.98 (m, 2H, H-6, -8), 7.65 – 7.73 (d, J = 8.55 Hz, 3H, H-5, -2', -6')

ESI-MS: cal. 411.14, exp. 411.1 ( $[\text{M}+\text{H}]^+$ )

HPLC: 98 % purity at 254 nm

$t_R$  (HPLC): 4.97 min;  $\lambda_{\text{max}}$  = 287 nm and 317 nm

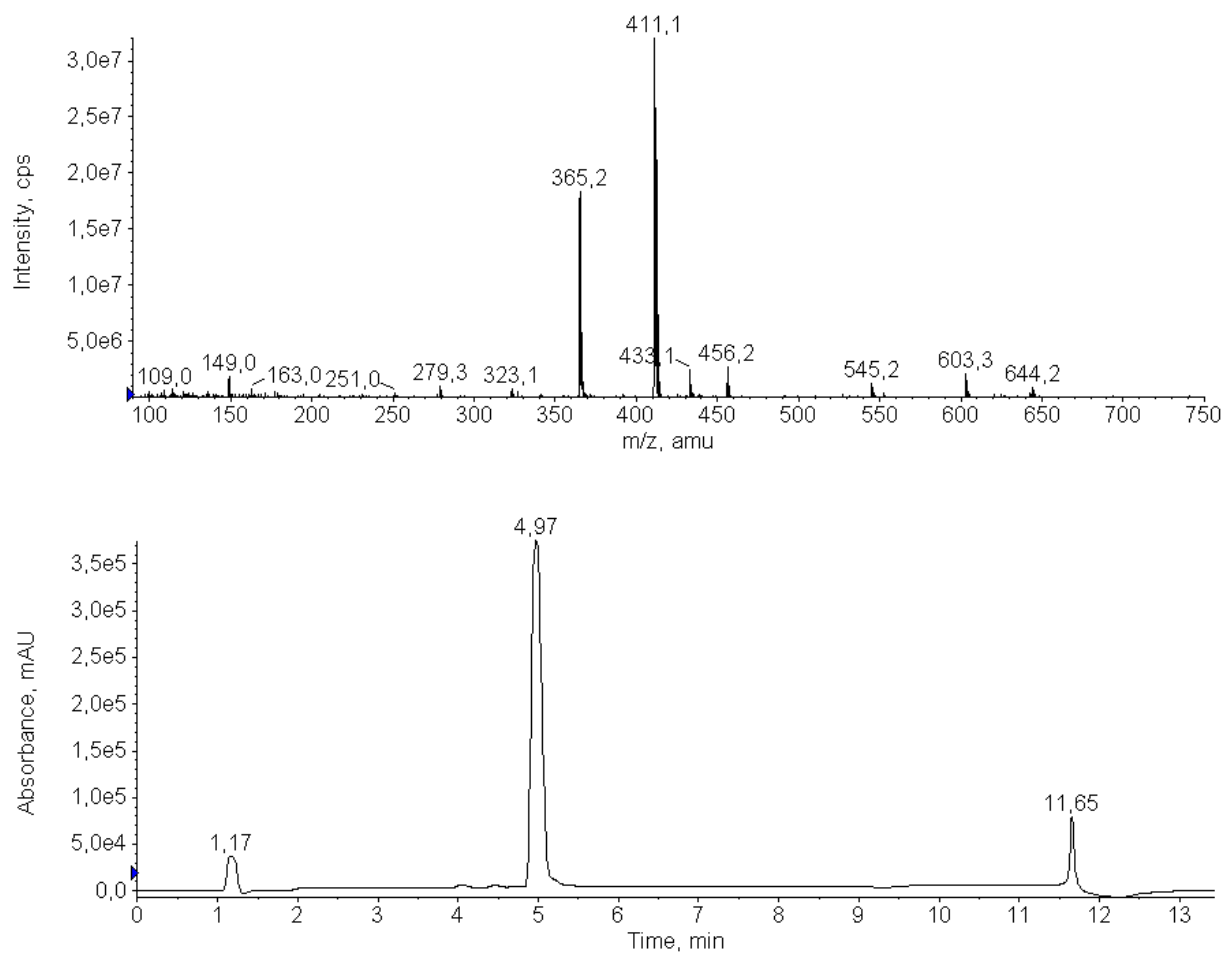

**Supporting Information Figure 82:** LC/MS analysis of **Scaff10-52**. Upper panel: Mass spectrum. Lower panel: according chromatogram.

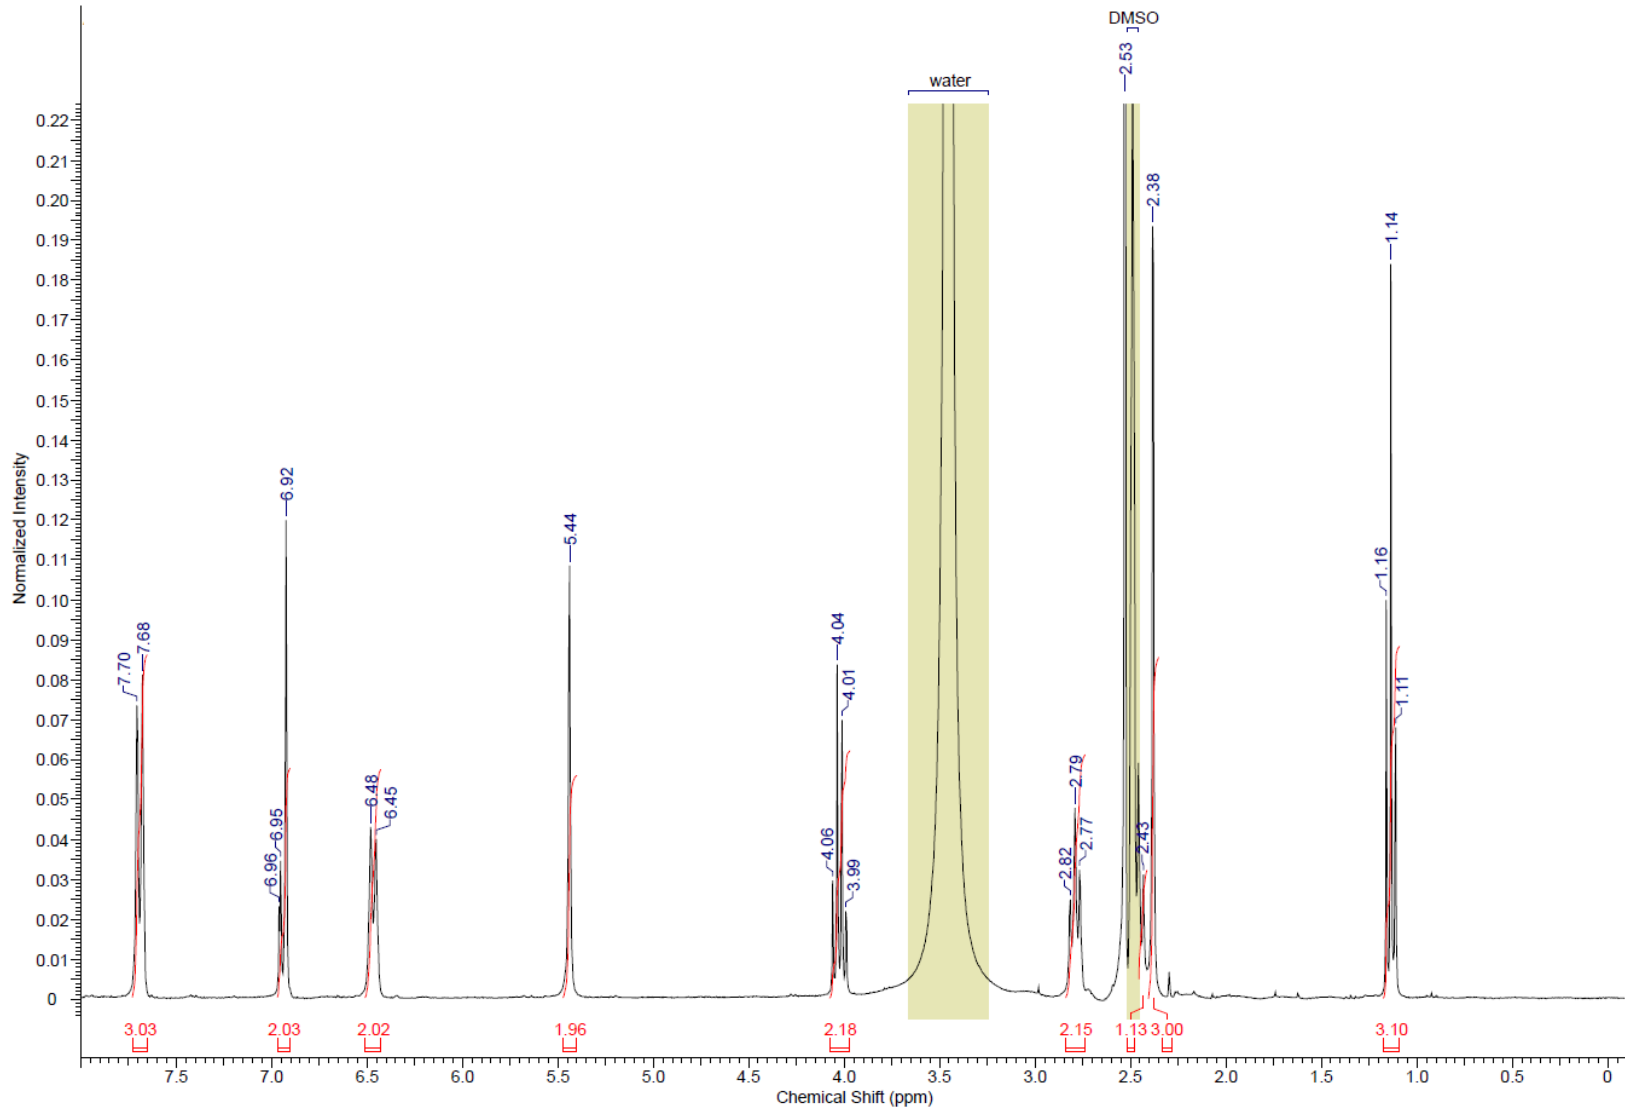

Supporting Information Figure 83: <sup>1</sup>H NMR spectrum of Scaff10-52, 300 MHz, DMSO-d<sub>6</sub>.

4.1.46 Ethyl 3-[7-[2-[4-[2-(4-hydroxyphenyl)-2-oxo-ethoxy]phenyl]-2-oxo-ethoxy]-4-methyl-2-oxo-chromen-3-yl]propanoate (**Scaff10-52d**)

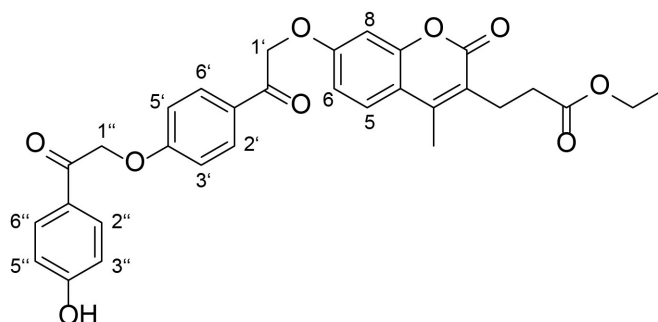

Ethyl 3-(7-hydroxy-4-methyl-2-oxo-chromen-3-yl)propanoate (**5a**) (50 mg, 0.18 mmol) was solved in acetone and preactivated with potash in excess (62 mg, 0.45 mmol) by 55 °C. The  $\alpha$ -haloketone 2-bromo-1-(4-hydroxyphenyl)ethanone (**2I**) was added (39 mg, 0.18 mmol). The mixture was refluxed at the same temperature for 4 h. The products Scaff10-52 and Scaff10-52d were purified using preparative HPLC. The final product after purification gave a yellowish solid.

$^1\text{H NMR}$  (300 MHz,  $\text{DMSO-d}_6$ ):  $\delta$ (ppm) = 1.09 – 1.18 (t,  $J = 7.33$  Hz, 3H,  $-\text{CH}_2\text{-CH}_3$ ), 2.35 – 2.42 (s, 3H, Ar- $\text{CH}_3$ ), 2.42 – 2.50 (t,  $J = 7.33$  Hz, 2H,  $-\text{CH}_2\text{-CH}_2\text{-COOEt}$ ), 2.75 – 2.84 (t,  $J = 7.33$  Hz, 2H,  $-\text{CH}_2\text{-CH}_2\text{-COOEt}$ ), 3.97 – 4.07 (q,  $J = 7.33$  Hz, 2H,  $-\text{CH}_2\text{-CH}_3$ ), 5.34 – 5.42 (s, 2H, H-1''), 5.60 – 5.66 (s, 2H, H-1'), 6.19 – 6.27 (d,  $J = 8.55$  Hz, 2H, H-3'', -5''), 6.95 – 7.06 (m, 4H, H-6, -8, -3', -5'), 7.56 – 7.63 (d,  $J = 9.77$  Hz, 2H, H-2', -6'), 7.67 – 7.73 (d,  $J = 9.77$  Hz, 1H, H-5), 7.92 – 7.99 (d,  $J = 8.55$  Hz, 2H, H-2'', -6'')

ESI-MS: cal. 545.18, exp. 545.1 ( $[\text{M}+\text{H}]^+$ )

HPLC: 98 % purity at 254 nm

$t_R$  (HPLC): 5.35 min;  $\lambda_{\text{max}} = 287$  nm and 316 nm

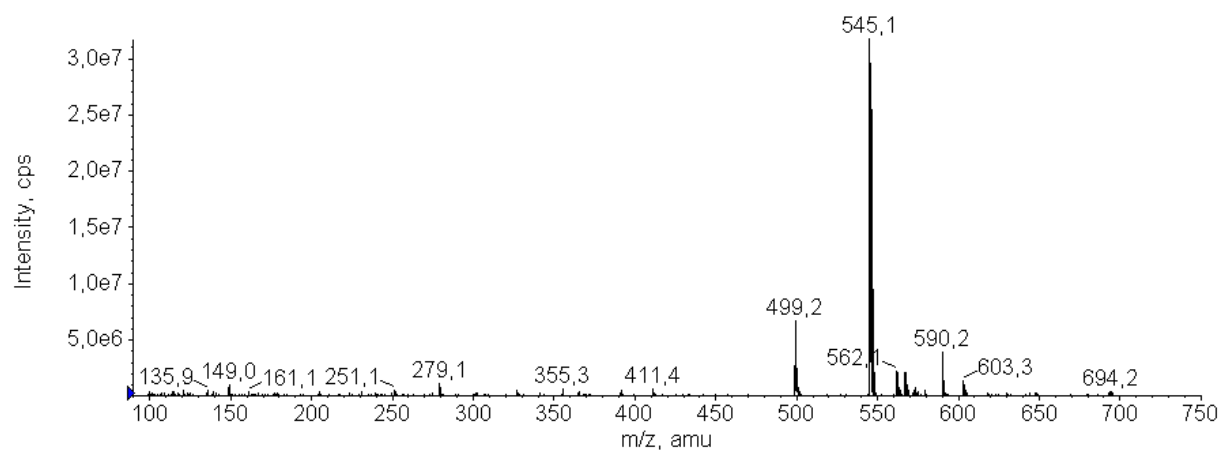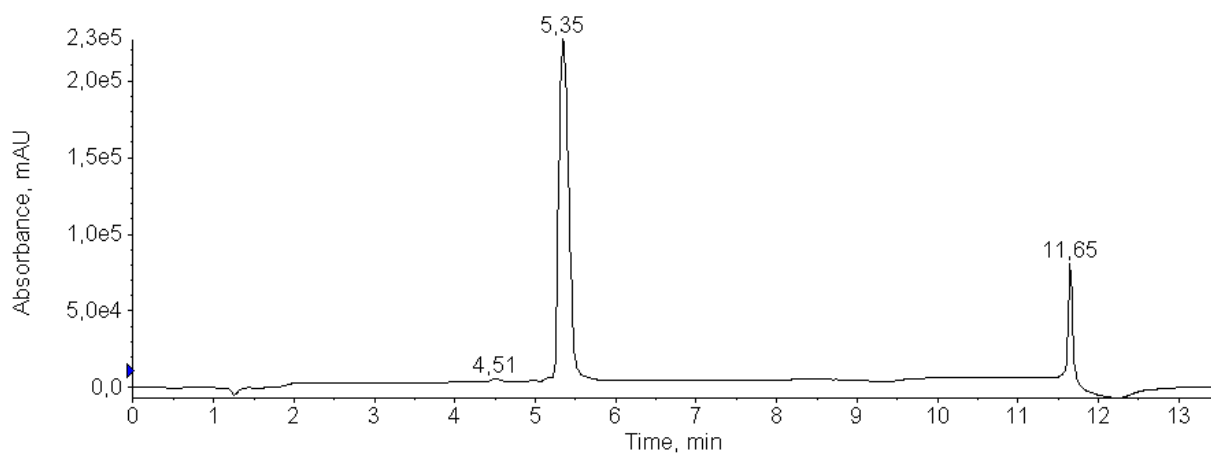

**Supporting Information Figure 84:** LC/MS analysis of **Scaff10-52d**. Upper panel: Mass spectrum. Lower panel: according chromatogram.

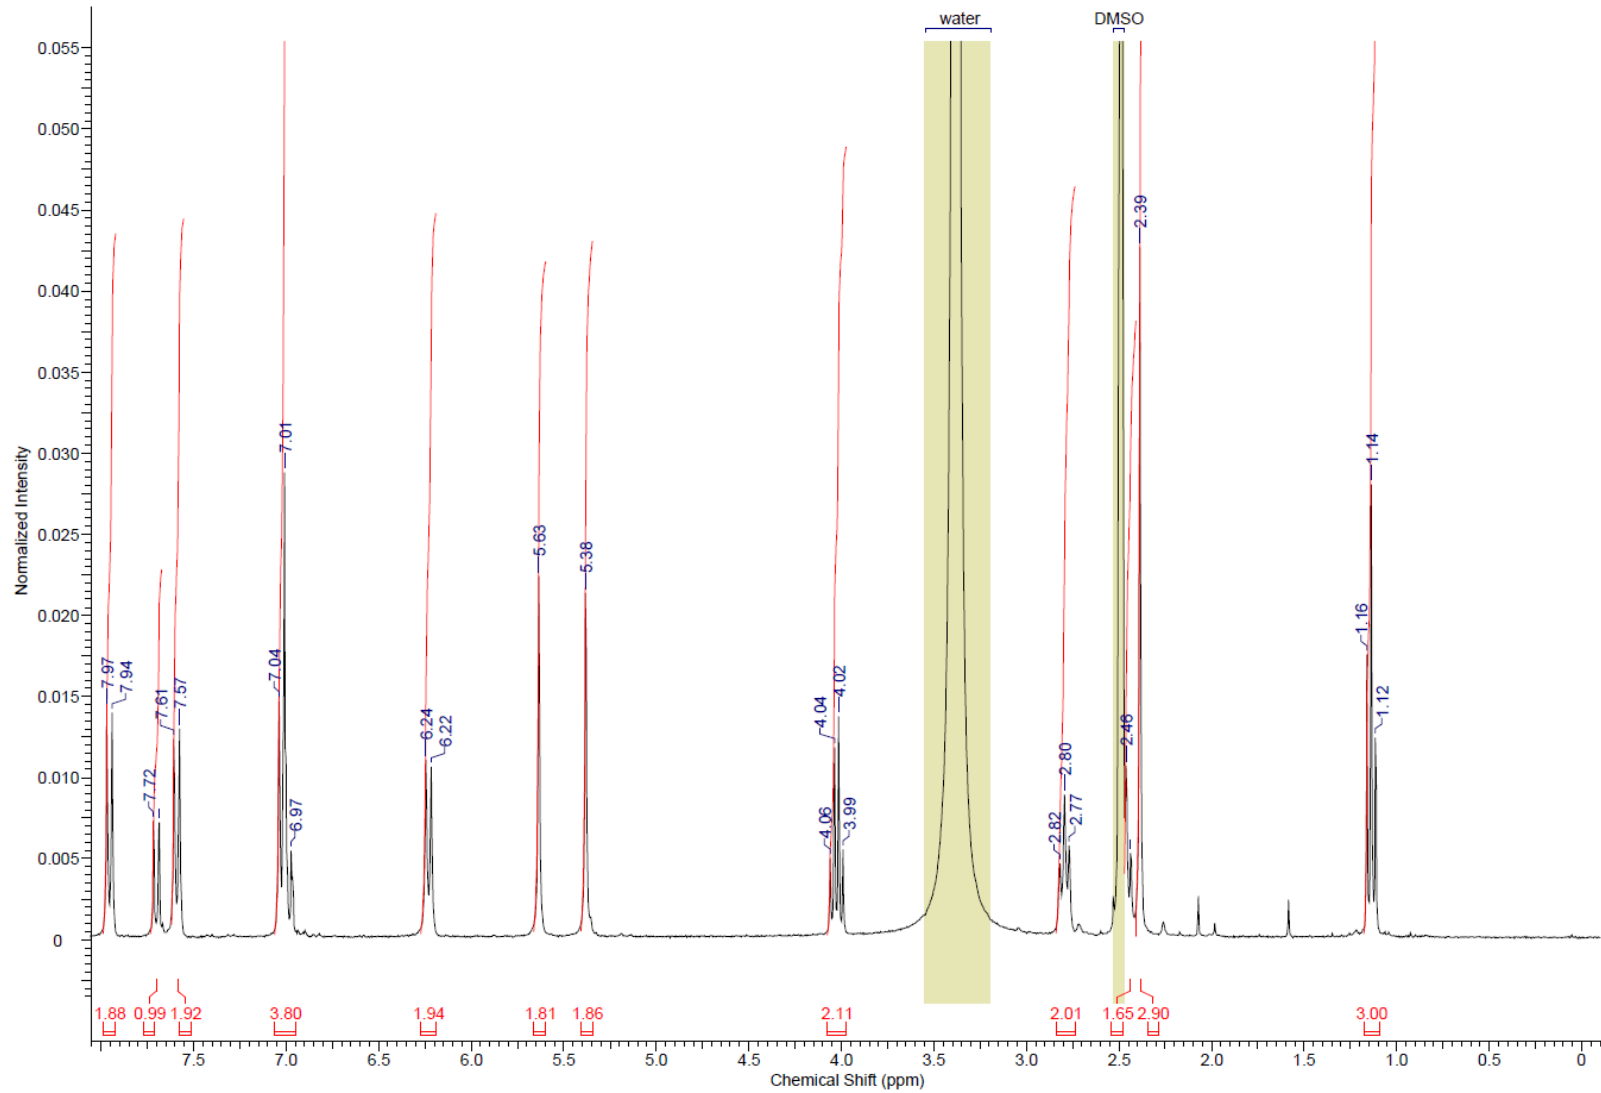

Supporting Information Figure 85:  $^1\text{H}$  NMR spectrum of Scaff10-52d, 300 MHz,  $\text{DMSO-d}_6$ .

4.1.47 Ethyl 3-(4-methyl-2-oxo-7-phenacyloxy-chromen-3-yl)propanoate (**Scaff10-56**)

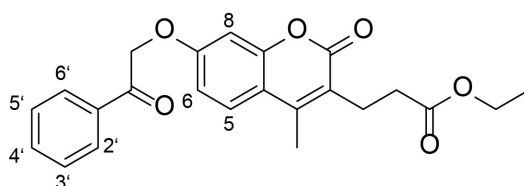

Ethyl 3-(7-hydroxy-4-methyl-2-oxo-chromen-3-yl)propanoate (**5a**) (100 mg, 0.36 mmol) was solved in 4 ml dry acetone and preactivated with potash in excess (125 mg, 0.90 mmol) by 55 °C. The  $\alpha$ -haloketone 2-bromo-1-phenylethanone (**2m**) was added (72 mg, 0.36 mmol). The mixture was refluxed at the same temperature for 2 h. The product was precipitated using 1 M H<sub>2</sub>SO<sub>4</sub> and purified using preparative HPLC with the following gradient: 5 % to 90 % ACN in H<sub>2</sub>O in 80 min. The product eluted at  $t_R$  = 61 min and was obtained after lyophilisation as white solid in 5 % yield (7 mg).

<sup>1</sup>H NMR (300 MHz, DMSO-d<sub>6</sub>):  $\delta$ (ppm) = 1.09 – 1.22 (t, J = 7.32 Hz, 3H, -CH<sub>2</sub>-CH<sub>3</sub>), 2.37 – 2.43 (s, 3H, Ar-CH<sub>3</sub>), 2.43 – 2.50 (t, J = 7.32 Hz, 2H, -CH<sub>2</sub>-CH<sub>2</sub>-COOEt), 2.75 – 2.87 (t, J = 7.32 Hz, 2H, -CH<sub>2</sub>-CH<sub>2</sub>-COOEt), 3.98 – 4.09 (q, J = 7.32 Hz, 2H, -CH<sub>2</sub>-CH<sub>3</sub>), 5.70 – 5.79 (s, 2H, -CO-CH<sub>2</sub>-OAr), 6.98 – 7.09 (m, 2H, H-6, -8), 7.53 – 7.63 (t, J = 8.54 Hz, 2H, H-3', -5'), 7.67 – 7.76 (m, 2H, H-5, -4'), 8.00 – 8.07 (d, J = 7.32 Hz, 2H, H-2', -6')

ESI-MS: cal. 395.14, exp. 395.1 ([M+H]<sup>+</sup>)

HPLC: 99 % purity at 254 nm

$t_R$  (HPLC): 6.77 min;  $\lambda_{max}$  = 285 nm and 320 nm



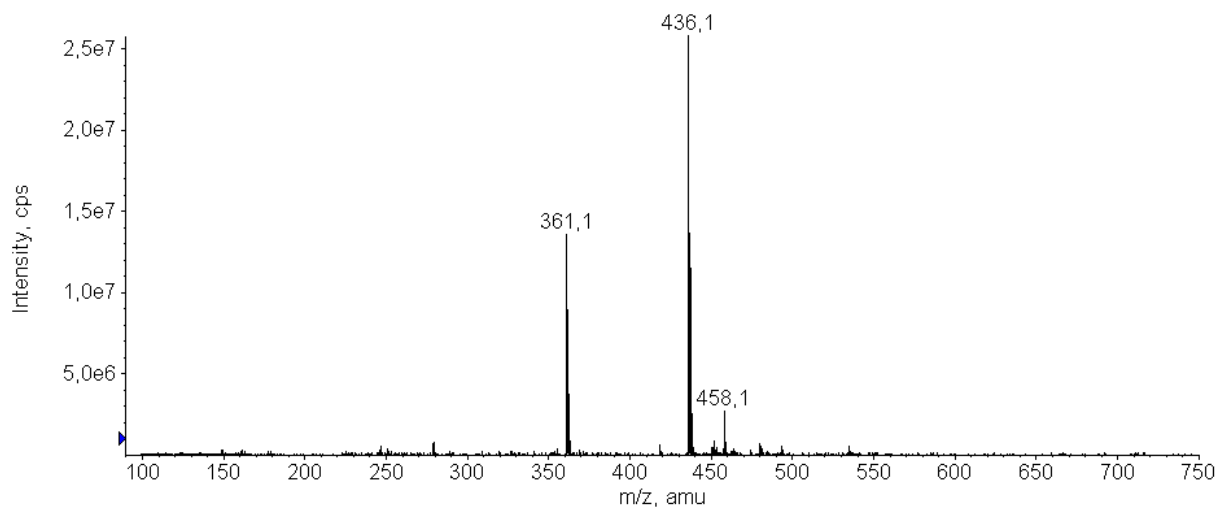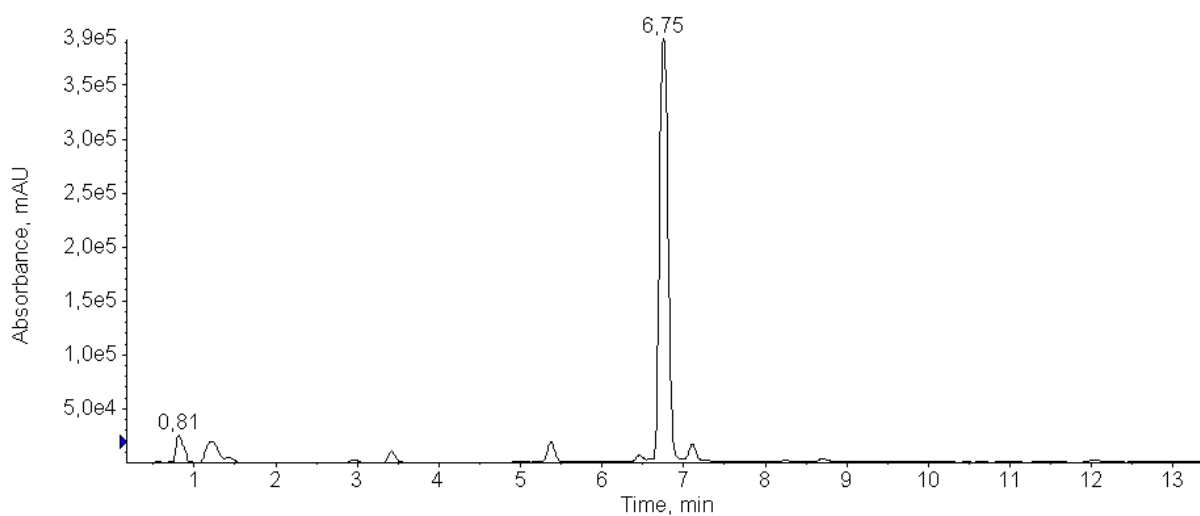

**Supporting Information Figure 86:** LC/MS analysis of **Scaff10-56**. Upper panel: Mass spectrum. Lower panel: according chromatogram.

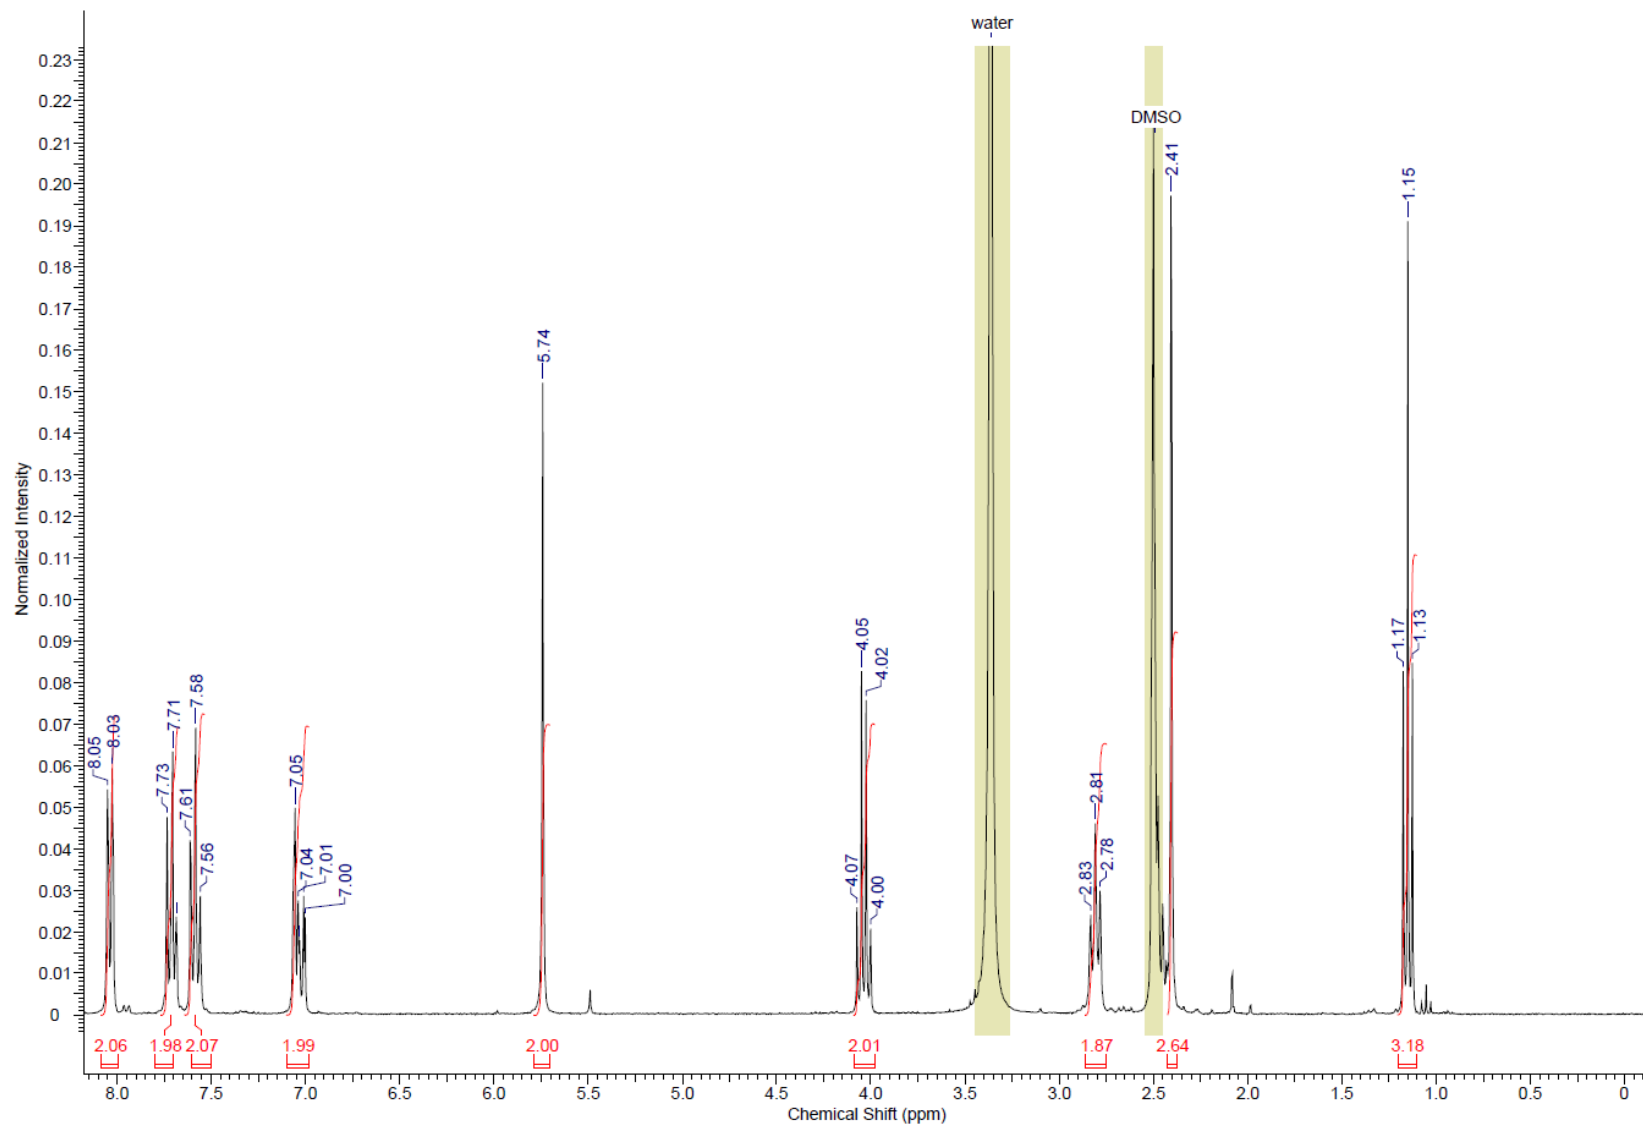

Supporting Information Figure 87: <sup>1</sup>H NMR spectrum of Scaff10-56, 300 MHz, DMSO-d<sub>6</sub>.

4.1.48 3-(5-Methyl-7-oxo-3-phenyl-furo[3,2-g]chromen-6-yl)propanoic acid (**Scaff10-58**)

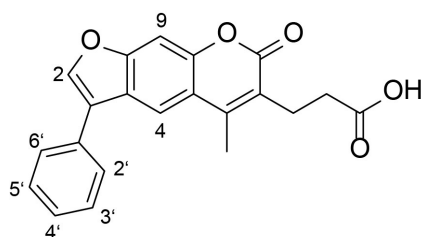

Ethyl 3-(4-methyl-2-oxo-7-phenacyloxy-chromen-3-yl)propanoate (**Scaff10-56**) (200 mg, 0.51 mmol) was saponificated in a mixture of 1 ml dry acetone and 4 ml 1 M sodium hydroxide at 60 °C for 1.5 h. Dropwise addition of 1 M HCl resulted in precipitation of the product. The precipitated solid was purified using preparative HPLC with the following gradient: 5 % to 90 % ACN in H<sub>2</sub>O in 80 min. The product eluted at  $t_R = 27$  min and was obtained after lyophilisation as orange-yellowish solid in 56 % yield (100 mg).

<sup>1</sup>H NMR (300 MHz, DMSO-d<sub>6</sub>):  $\delta$ (ppm) = 1.96 – 2.11 (t, J = 7.32 Hz, 2H, -CH<sub>2</sub>-CH<sub>2</sub>-COOH), 2.52 – 2.60 (s, 3H, Ar-CH<sub>3</sub>), 2.71 – 2.83 (t, J = 8.54 Hz, 2H, -CH<sub>2</sub>-CH<sub>2</sub>-COOH), 7.38 – 7.47 (t, J = 7.32 Hz, 1H, H-4'), 7.50 – 7.59 (t, J = 7.32 Hz, 2H, H-3', -5'), 7.71 – 7.74 (s, 1H, H-9), 7.77 – 7.84 (d, J = 7.32 Hz, 2H, H-2', -6'), 8.08 – 8.14 (s, 1H, H-4), 8.42 – 8.47 (s, 1H, H-2)

ESI-MS: cal. 349.10, exp. 349.1 ([M+H]<sup>+</sup>)

HPLC: 99 % purity at 254 nm

$t_R$  (HPLC): 6.39 min;  $\lambda_{max}$  = 246 nm and 300 nm

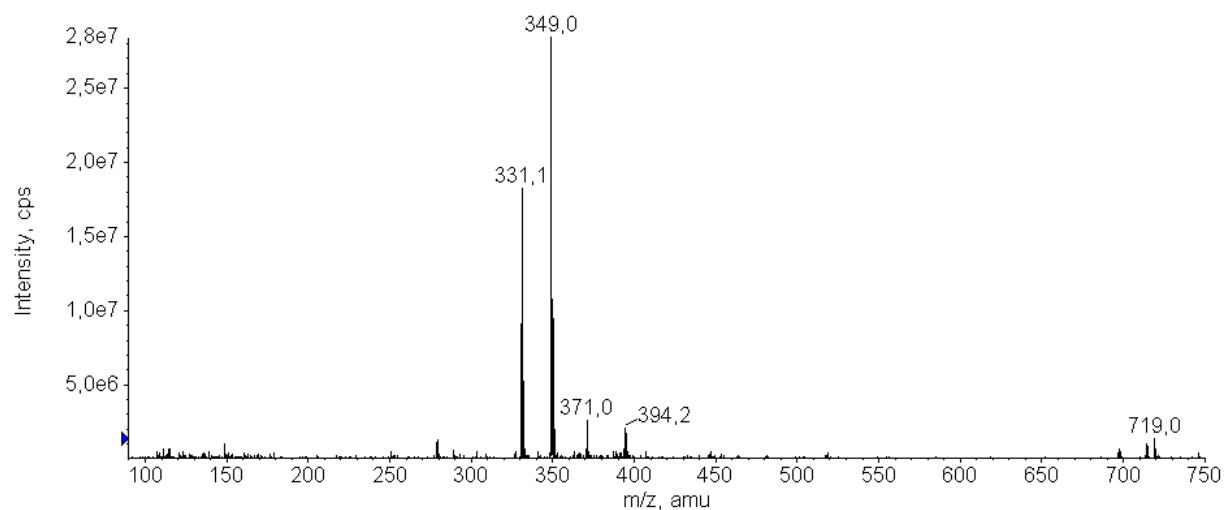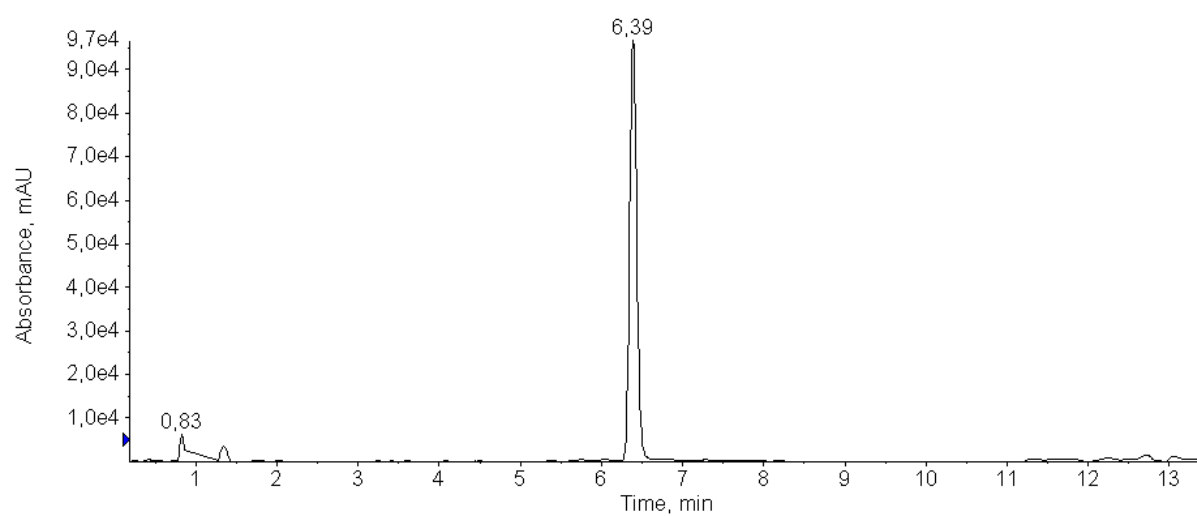

**Supporting Information Figure 88:** LC/MS analysis of **Scaff10-58**. Upper panel: Mass spectrum. Lower panel: according chromatogram.

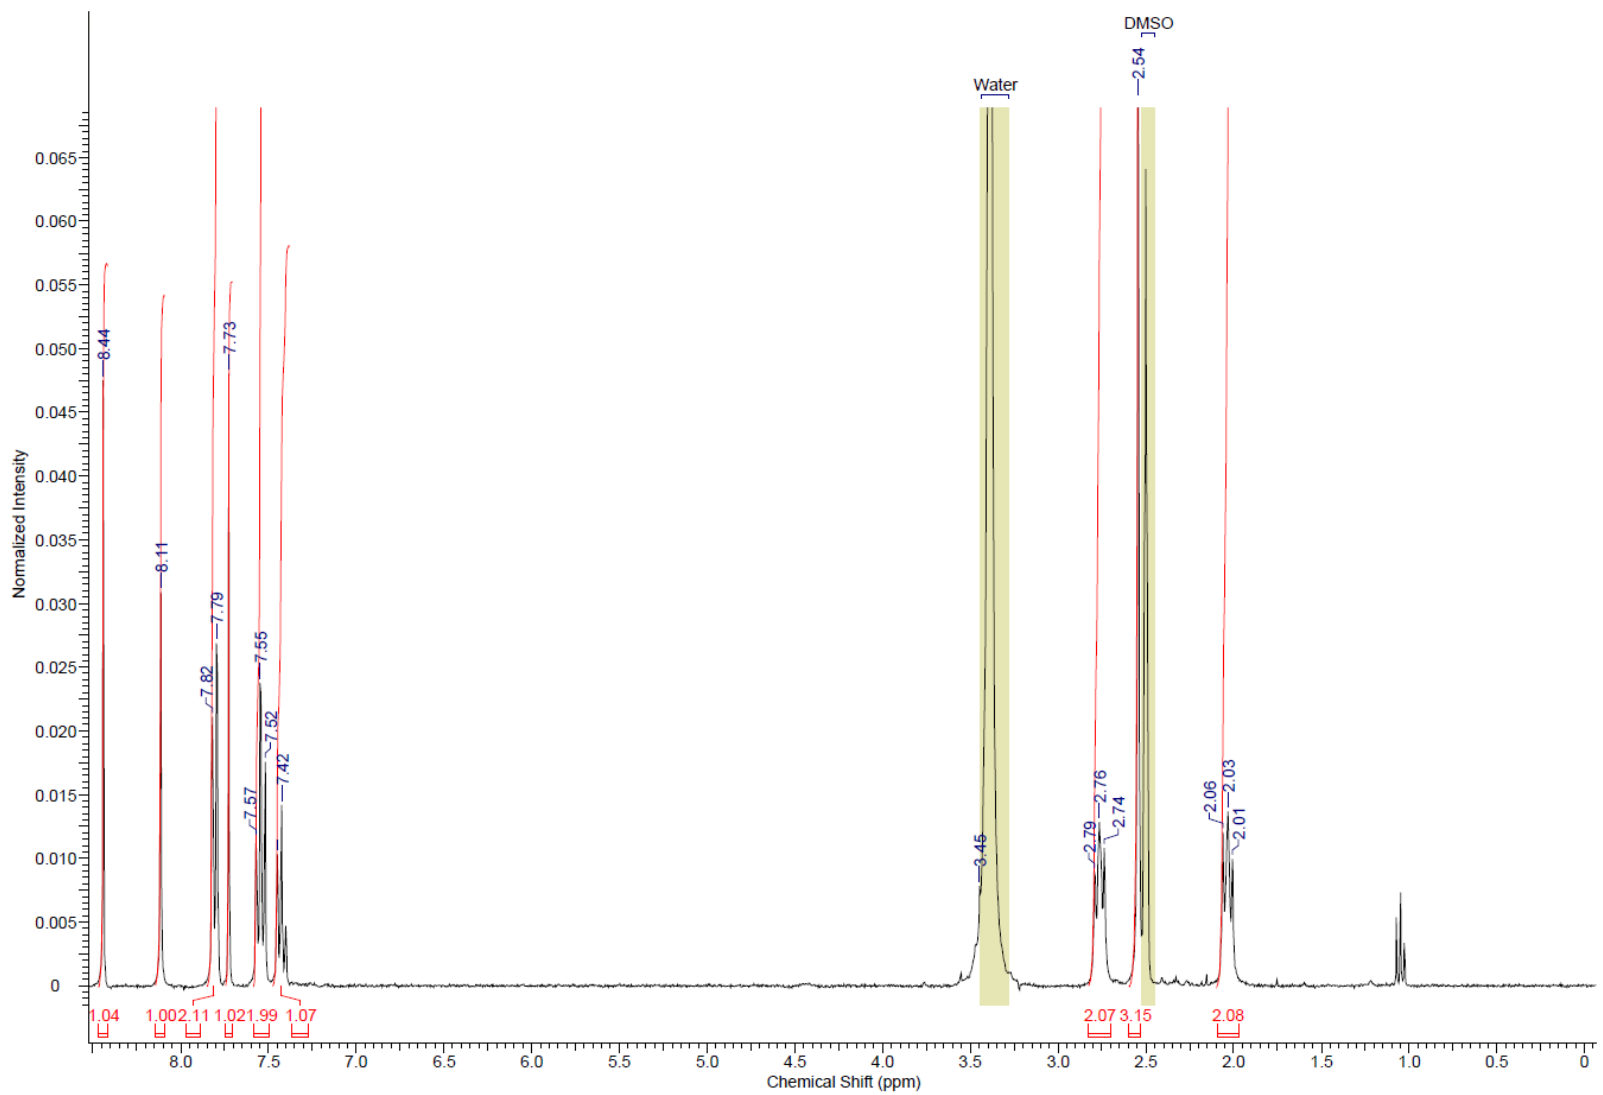

Supporting Information Figure 89: <sup>1</sup>H NMR spectrum of Scaff10-34, 300 MHz, DMSO-d<sub>6</sub>.

4.1.49 Ethyl 3-[7-[(4-methoxyphenyl)methoxy]-4-methyl-2-oxo-chromen-3-yl]propanoate (**Scaff10-59**)

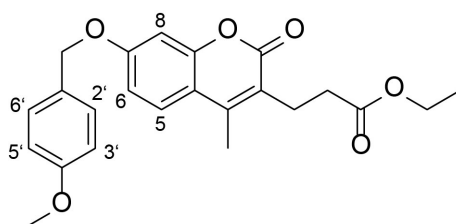

Ethyl 3-(7-hydroxy-4-methyl-2-oxo-chromen-3-yl)propanoate (**5a**) (50 mg, 0.18 mmol) was solved in acetone and preactivated with potash in excess (62 mg, 0.45 mmol) by 55 °C. The  $\alpha$ -haloketone 1-(bromomethyl)-4-methoxy-benzene (**2n**) was added (36 mg, 0.18 mmol). The mixture was refluxed at the same temperature for 16 h. The product was precipitated using 1 M H<sub>2</sub>SO<sub>4</sub>. The final product after purification gave a white solid.

<sup>1</sup>H NMR (300 MHz, DMSO-d<sub>6</sub>):  $\delta$ (ppm) = 1.09 – 1.17 (t, J = 7.33 Hz, 3H, -CH<sub>2</sub>-CH<sub>3</sub>), 2.36 – 2.40 (s, 3H, Ar-CH<sub>3</sub>), 2.42 – 2.49 (t, J = 7.33 Hz, 2H, -CH<sub>2</sub>-CH<sub>2</sub>-COOEt), 2.74 – 2.84 (t, J = 7.33 Hz, 2H, -CH<sub>2</sub>-CH<sub>2</sub>-COOEt), 3.71 – 3.78 (s, 3H, -OCH<sub>3</sub>), 3.98 – 4.08 (q, J = 7.33 Hz, 2H, -CH<sub>2</sub>-CH<sub>3</sub>), 5.09 – 5.15 (s, 2H, -O-CH<sub>2</sub>-Ar), 6.91 – 7.04 (m, 4H, H-6, -8, -3', -5'), 7.36 – 7.42 (d, J = 9.77 Hz, 2H, H-2', -6'), 7.67 – 7.72 (d, J = 8.55 Hz, 1H, H-5)

ESI-MS: cal. 397.16, exp. 397.1 ([M+H]<sup>+</sup>)

HPLC: 90 % purity at 254 nm

t<sub>R</sub> (HPLC): 7.44 min;  $\lambda_{\max}$  = 282 nm and 323 nm

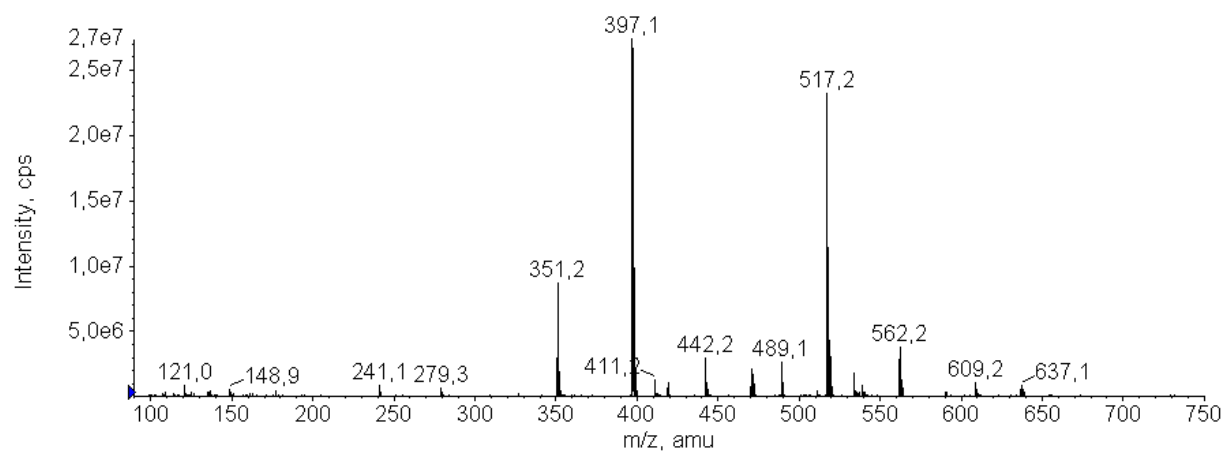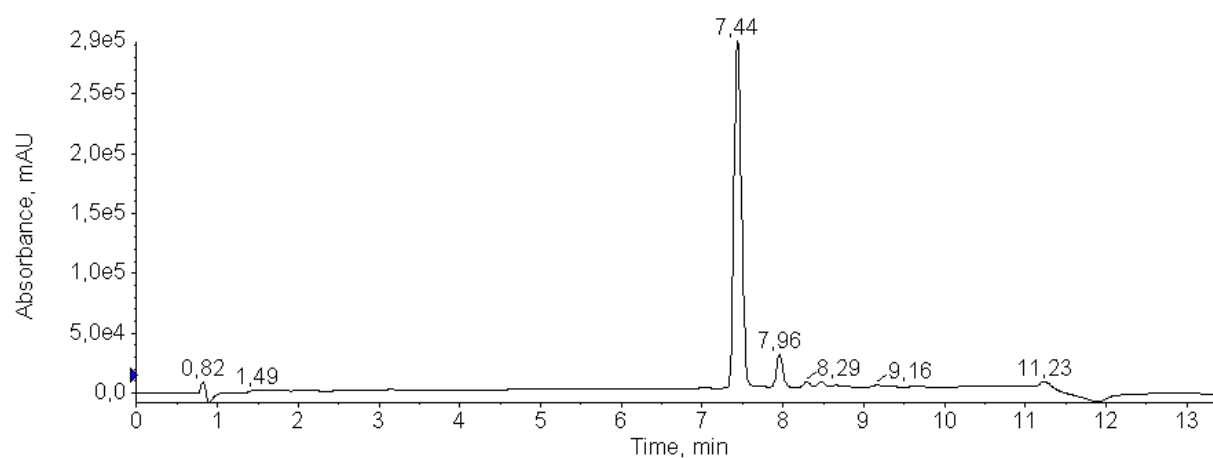

**Supporting Information Figure 90.:** LC/MS analysis of **Scaff10-59**. Upper panel: Mass spectrum. Lower panel: according chromatogram.

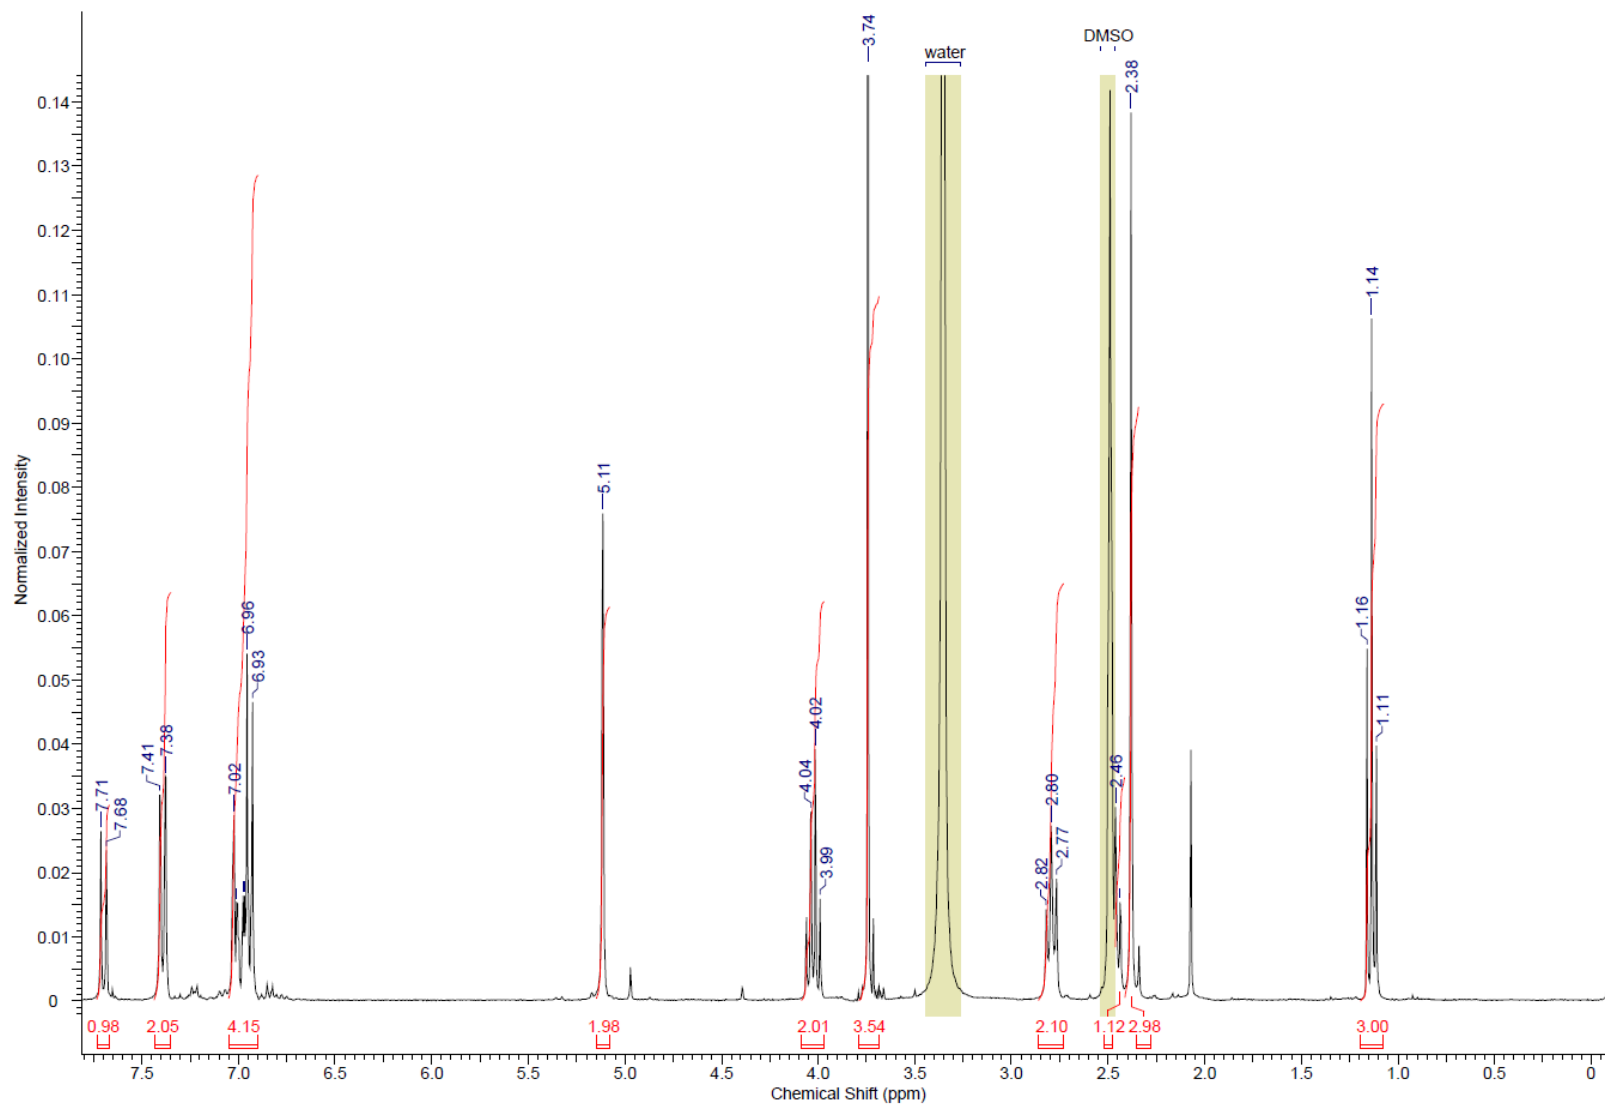

Supporting Information Figure 91:  $^1\text{H}$  NMR spectrum of **Scaff10-59**, 300 MHz,  $\text{DMSO-d}_6$ .



4.1.50 3-[7-[(4-Methoxyphenyl)methoxy]-4-methyl-2-oxo-chromen-3-yl]propanoic acid (**Scaff10-60**)

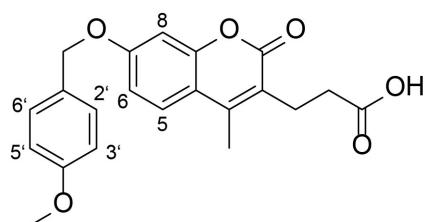

Ethyl 3-[7-[(4-methoxyphenyl)methoxy]-4-methyl-2-oxo-chromen-3-yl]propanoate (**Scaff10-59**) (50 mg, 0.13 mmol) was saponificated in a mixture of ethanol and 2 ml 1 M sodium hydroxide at 80 °C for 1 h. Dropwise addition of 1 M H<sub>2</sub>SO<sub>4</sub> resulted in precipitation of the product. The precipitated solid was filtered. The final product after purification gave a white solid.

<sup>1</sup>H NMR (300 MHz, DMSO-d<sub>6</sub>): δ(ppm) = 2.31 – 2.44 (m, 5H, Ar-CH<sub>3</sub>, -CH<sub>2</sub>-CH<sub>2</sub>-COOH), 2.69 – 2.83 (t, J = 7.33 Hz, 2H, -CH<sub>2</sub>-CH<sub>2</sub>-COOH), 3.70 – 3.79 (s, 3H, -OCH<sub>3</sub>), 5.07 – 5.17 (s, 2H, -O-CH<sub>2</sub>-Ar), 6.90 – 7.05 (m, 4H, H-6, -8, -3', -5'), 7.36 – 7.43 (d, J = 8.55 Hz, 2H, H-2', -6'), 7.67 – 7.73 (d, J = 8.55 Hz, 1H, H-5)

ESI-MS: cal. 369.13, exp. 369.1 ([M+H]<sup>+</sup>)

HPLC: 98 % purity at 254 nm

t<sub>R</sub> (HPLC): 6.01 min; λ<sub>max</sub> = 283 nm and 322 nm

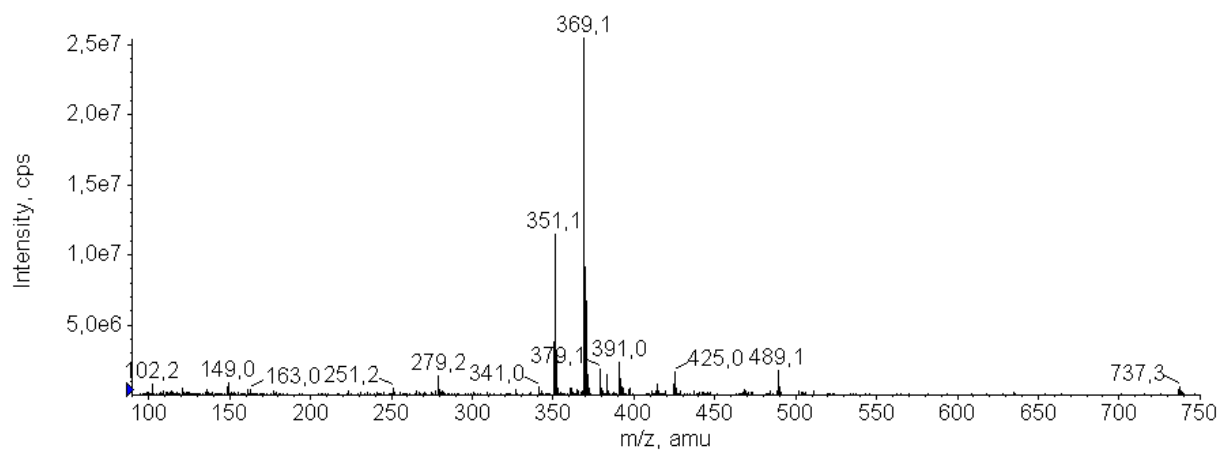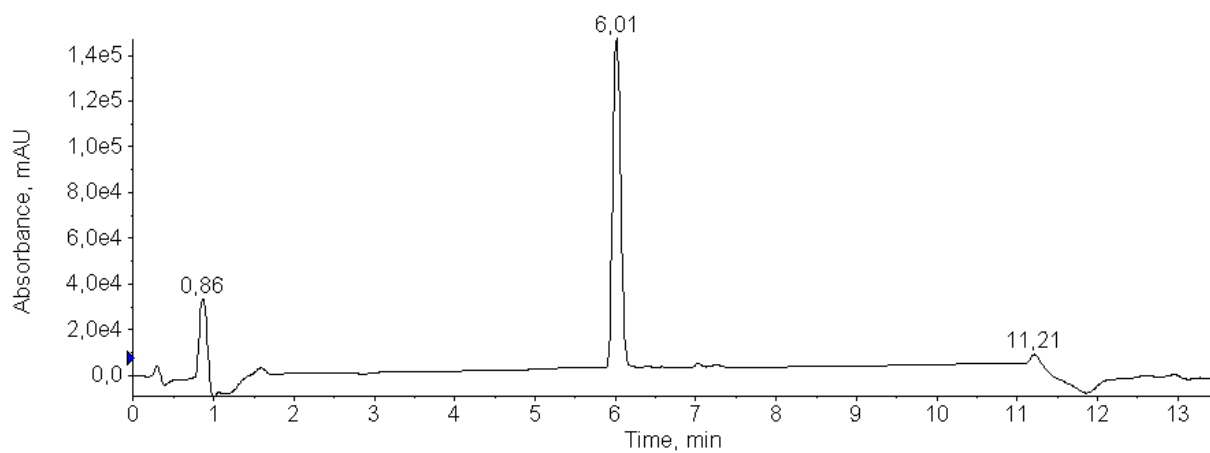

**Supporting Information Figure 92:** LC/MS analysis of **Scaff10-60**. Upper panel: Mass spectrum. Lower panel: according chromatogram.

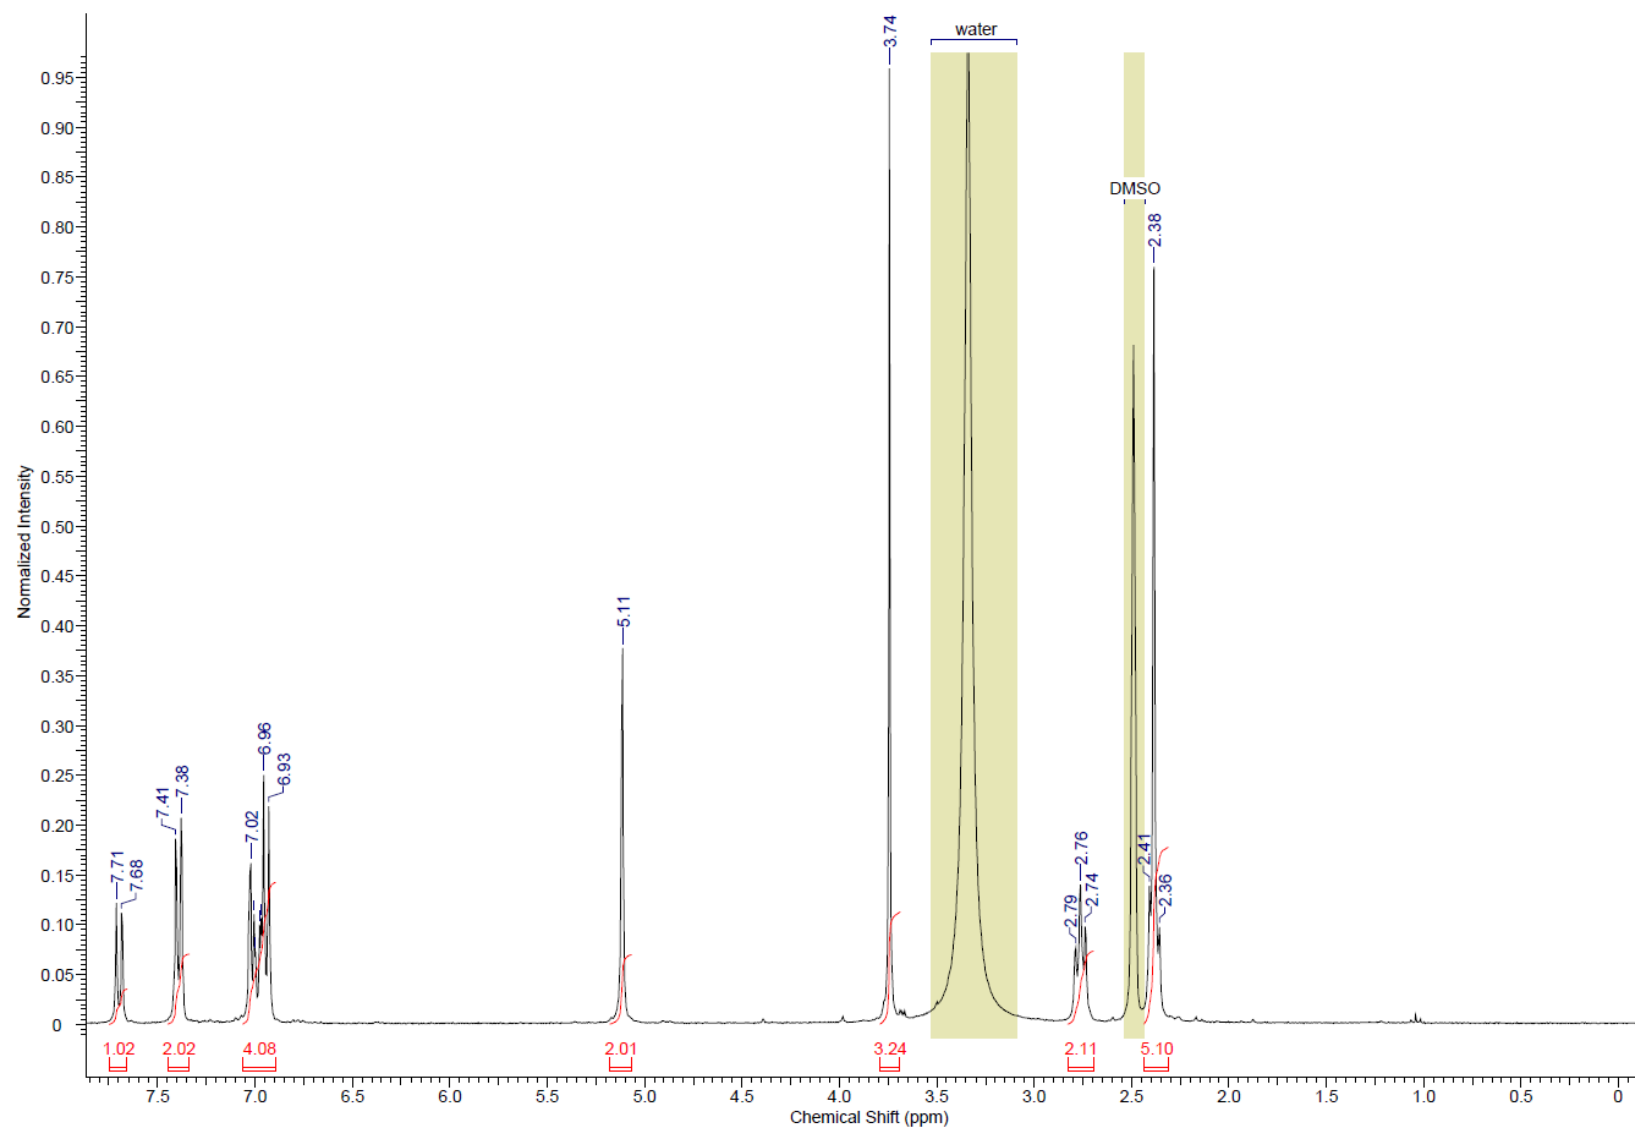

Supporting Information Figure 93: <sup>1</sup>H NMR spectrum of Scaff10-60, 300 MHz, DMSO-d<sub>6</sub>.

4.1.51 2-[3-[3-(4-Methoxyphenyl)-5-methyl-7-oxo-furo[3,2-g]chromen-6-yl]propanoylamino]acetic acid (**Scaff10-61**)

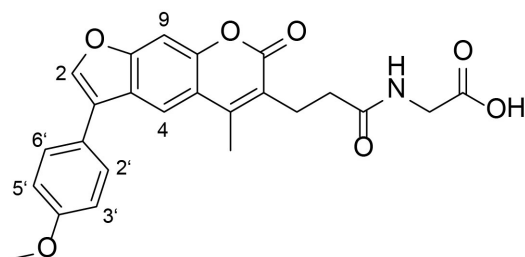

3-[3-(4-Methoxyphenyl)-5-methyl-7-oxo-furo[3,2-g]chromen-6-yl]propanoic acid (**Scaff10-8**) (50 mg, 0.13 mmol) was incubated with diisopropylcarbodiimide (DIC) (20 mg, 0.16 mmol) and 1-hydroxybenzotriazole (HOBt) (22 mg, 0.16 mmol) solved in 3 ml DMF for 5 min at 25 °C. A mixture of glycine-tert-butylester (67 mg, 0.40 mmol), TEA (40 mg, 0.4 mmol) and 1 ml DMF was added. After 24 h at 25 °C, 4 ml of water, 2 ml 1 M NH<sub>4</sub>Cl, 2 ml 1 M NaHCO<sub>3</sub> and 10 ml ethyl acetate were added. In order to remove the tert-butyl moiety, the organic layer was mixed with 5 ml methylene chloride, 4.5 ml trifluoro acetic acid and 0.5 ml water. After 1 h at 25 °C, the solution was neutralised using NaHCO<sub>3</sub>. Solvent was removed under reduced pressure. The solid was resolved in ethyl acetate and extracted in citric acid (pH 3). Further purification of the organic layer was performed using preparative HPLC with the following gradient: 5 % to 90 % ACN in H<sub>2</sub>O in 80 min. The product eluted at  $t_R = 33$  min and was obtained after lyophilisation as white solid in 6 % yield (3.5 mg).

<sup>1</sup>H NMR (300 MHz, DMSO-d<sub>6</sub>):  $\delta$ (ppm) = 2.28 – 2.42 (t, J = 7.32 Hz, 3H, -CH<sub>2</sub>-CH<sub>2</sub>-CONH-), 2.52 – 2.58 (s, 3H, Ar-CH<sub>3</sub>), 2.80 – 2.82 (t, J = 7.32 Hz, 2H, -CH<sub>2</sub>-CH<sub>2</sub>-CONH-), 3.68 – 3.77 (d, J = 6.10 Hz, 2H, -CONH-CH<sub>2</sub>-COOH), 3.78 – 3.89 (s, 3H, -OCH<sub>3</sub>), 7.07 – 7.15 (d, J = 8.54 Hz, 2H, H-3', -5'), 7.70 – 7.78 (m, 3H, H-9, -2', -6'), 8.10 – 8.14 (s, 1H, H-4), 8.22 – 8.30 (t, J = 6.10 Hz, 1H, -CONH-), 8.36 -8.40 (s, 1H, H-2)

ESI-MS: cal. 436.14, exp. 436.1 ([M+H]<sup>+</sup>)

HPLC: 97 % purity at 254 nm

$t_R$  (HPLC): 5.63 min;  $\lambda_{max} = 250$  nm and 306 nm

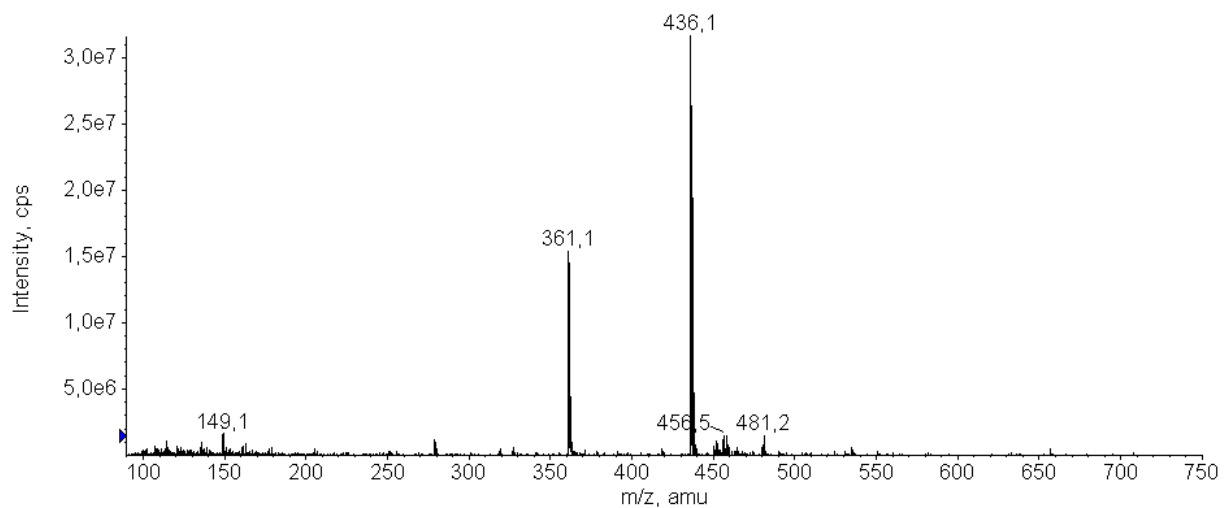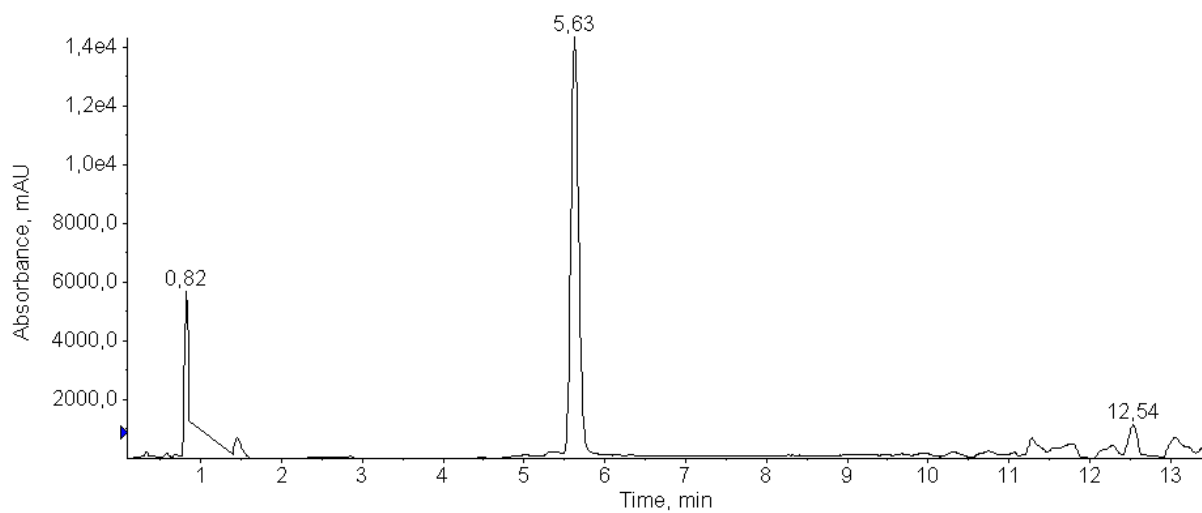

**Supporting Information Figure 94:** LC/MS analysis of **Scaff10-61**. Upper panel: Mass spectrum. Lower panel: according chromatogram.

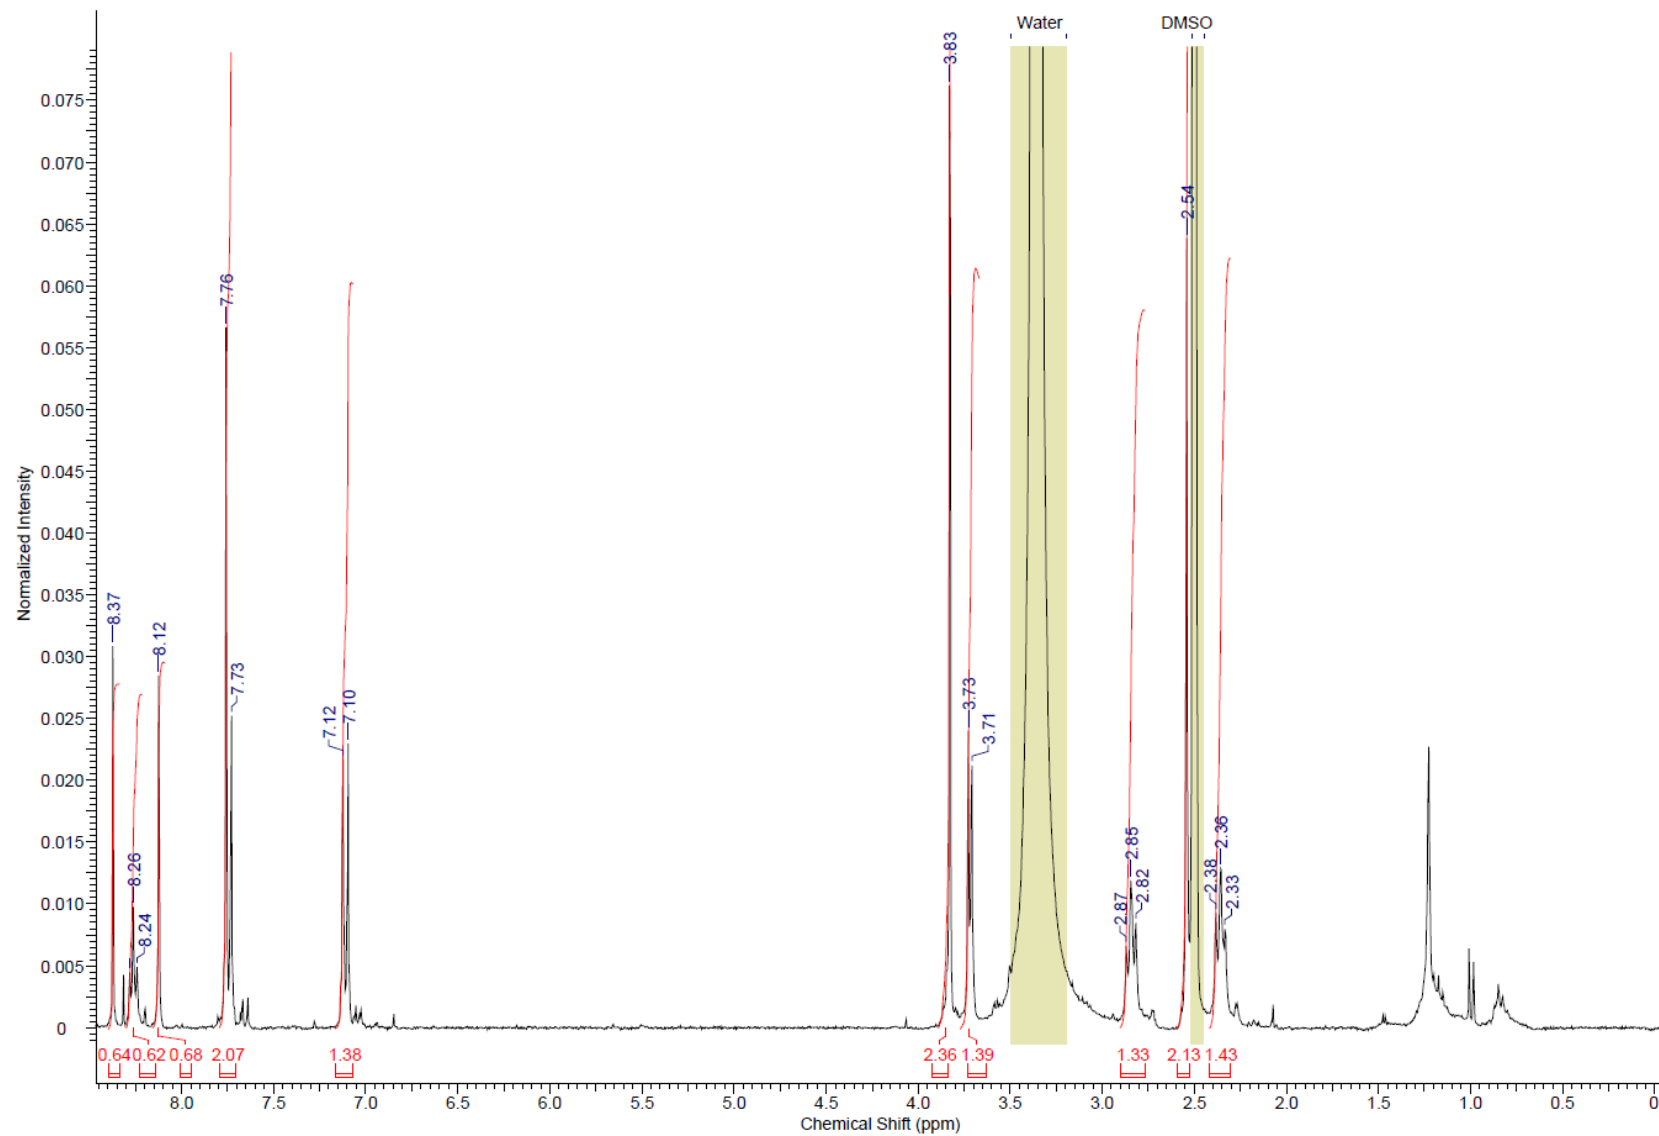

Supporting Information Figure 95: <sup>1</sup>H NMR spectrum of Scaff10-61, 300 MHz, DMSO-d<sub>6</sub>.

4.1.52 Ethyl 3-[7-[2-[4-(3-methoxyphenyl)phenyl]-2-oxo-ethoxy]-4-methyl-2-oxo-chromen-3-yl]propanoate  
(Scaff10-62)

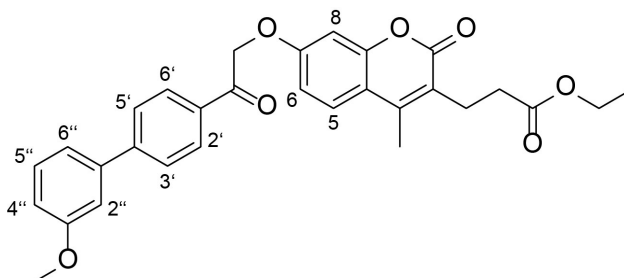

Ethyl 3-(7-hydroxy-4-methyl-2-oxo-chromen-3-yl)propanoate (**5a**) (196 mg, 0.71 mmol) was solved in 8 ml dry acetone and preactivated with potash in excess (245 mg, 1.77 mmol) at 55 °C. The  $\alpha$ -haloketone 2-iodo-1-[4-(3-methoxyphenyl)phenyl]ethanone (**2a**) was added (250 mg, 0.71 mmol). The mixture was refluxed at the same temperature for 0.5 h. The product was precipitated using 1 M H<sub>2</sub>SO<sub>4</sub> and purified using preparative HPLC with the following gradient: 25 % to 95 % ACN in H<sub>2</sub>O in 80 min. The product eluted at  $t_R$  = 62.5 min and was obtained after lyophilisation as white solid in 6 % yield (21 mg).

<sup>1</sup>H NMR (300 MHz, DMSO-d<sub>6</sub>):  $\delta$ (ppm) = 1.08 – 1.20 (t, J = 7.32 Hz, 3H, -CH<sub>2</sub>-CH<sub>3</sub>), 2.34 – 2.43 (s, 3H, Ar-CH<sub>3</sub>), 2.42 – 2.54 (t, J = 8.54 Hz, 2H, -CH<sub>2</sub>-CH<sub>2</sub>-COOEt), 2.76 – 2.87 (t, J = 7.32 Hz, 2H, -CH<sub>2</sub>-CH<sub>2</sub>-COOEt), 3.80 – 3.88 (s, 3H, -OCH<sub>3</sub>), 3.99 – 4.10 (q, J = 7.32 Hz, 2H, -CH<sub>2</sub>-CH<sub>3</sub>), 5.73 – 5.80 (s, 2H, -CO-CH<sub>2</sub>-OAr), 6.99 – 7.11 (m, 3H, H-6, -8, -4''), 7.28 – 7.37 (m, 2H, H-2'', -6''), 7.40 – 7.48 (t, J = 7.32 Hz, 1H, H-5''), 7.70 – 7.77 (d, J = 9.77 Hz, 1H, H-5), 7.86 – 7.93 (d, J = 8.54 Hz, 2H, H-3', -5'), 8.08 – 8.15 (d, J = 8.55 Hz, 2H, H-2', -6')

ESI-MS: cal. 501.19, exp. 501.1 ([M+H]<sup>+</sup>)

HPLC: 98 % purity at 254 nm

$t_R$  (HPLC): 7.86 min;  $\lambda_{max}$  = 292 nm and 310 nm

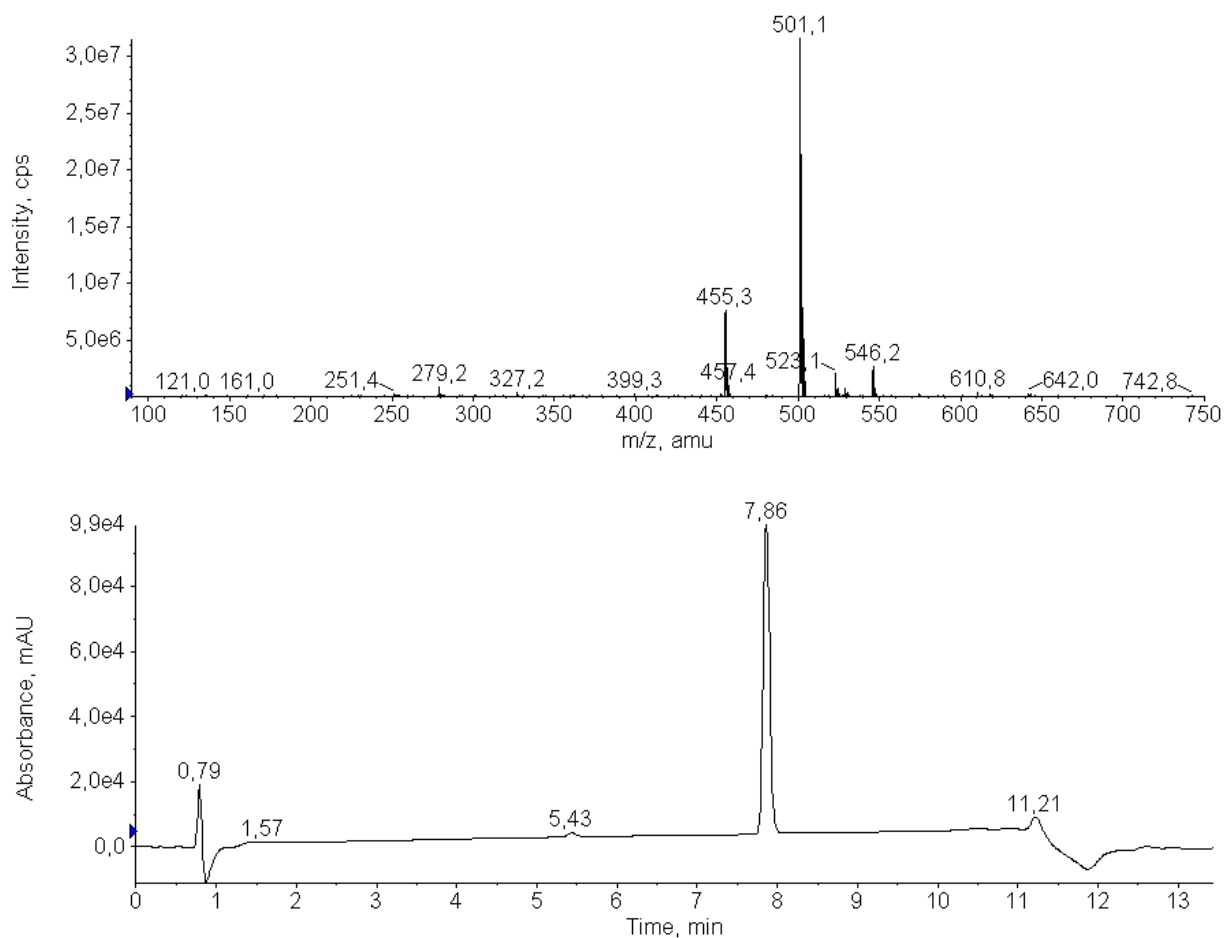

**Supporting Information Figure 96.:** LC/MS analysis of **Scaff10-62**. Upper panel: Mass spectrum. Lower panel: according chromatogram.



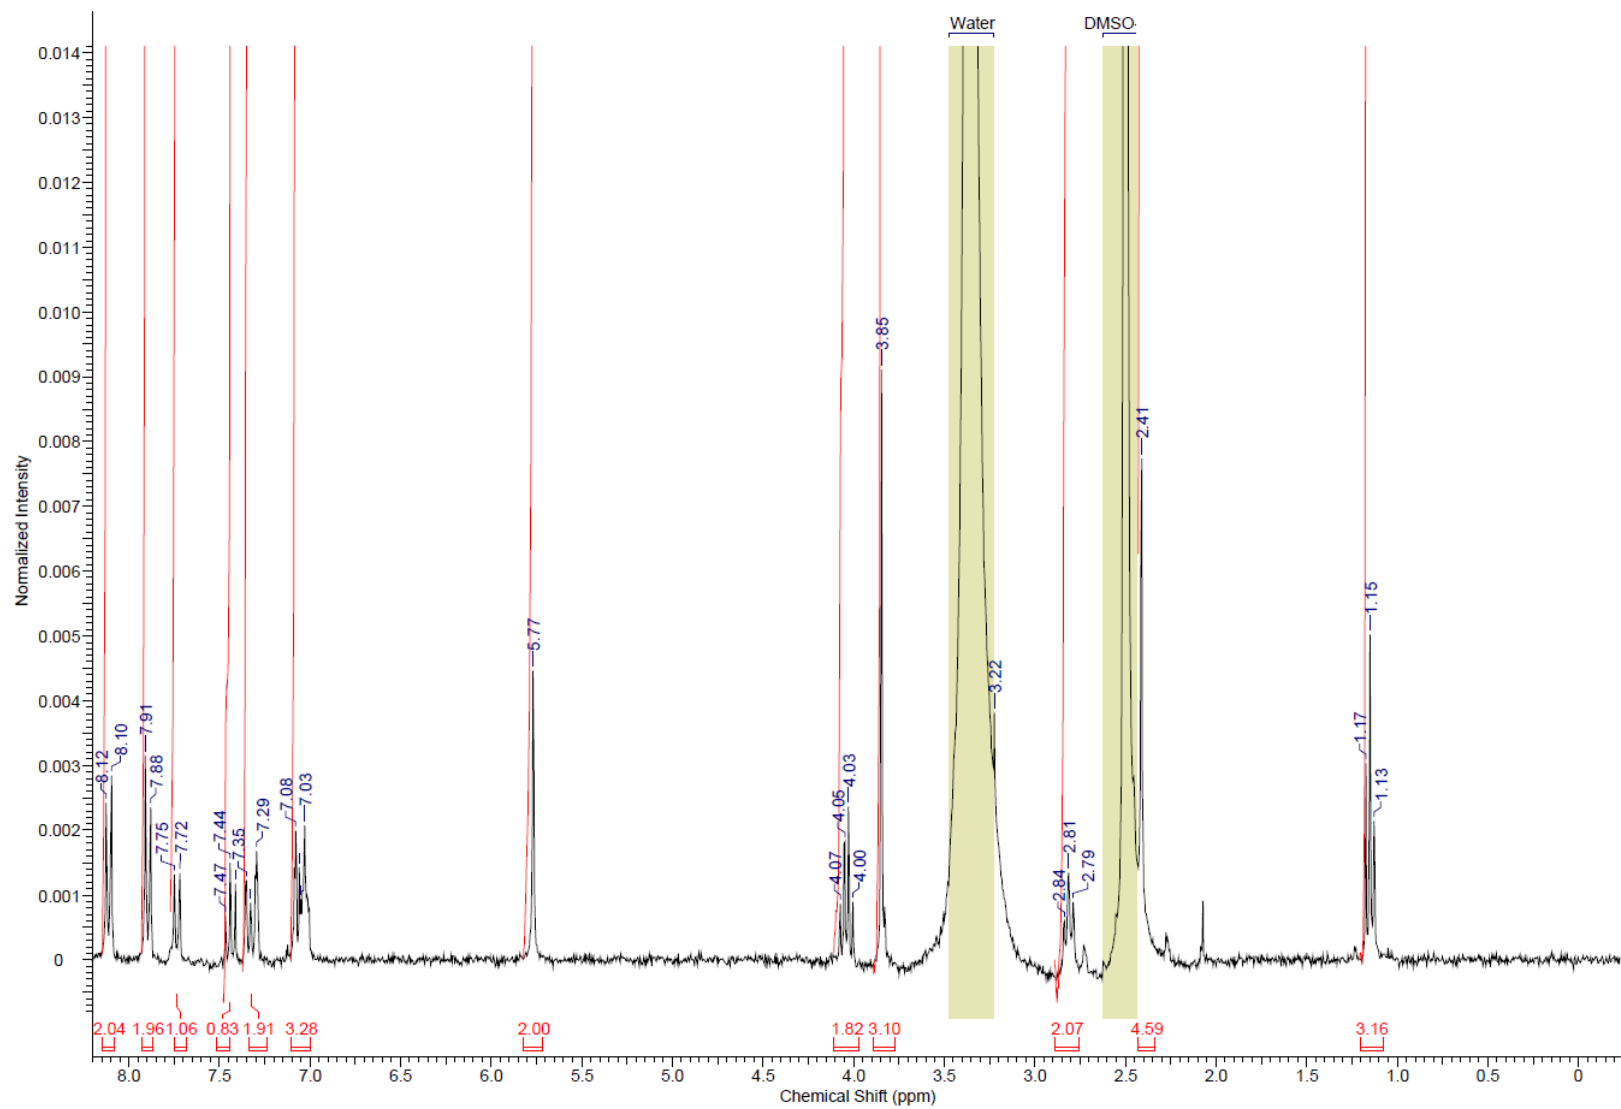

Supporting Information Figure 97: <sup>1</sup>H NMR spectrum of Scaff10-62, 300 MHz, DMSO-d<sub>6</sub>.

4.1.53 3-[7-[2-[4-(3-Methoxyphenyl)phenyl]-2-oxo-ethoxy]-4-methyl-2-oxo-chromen-3-yl]propanoic acid  
(Scaff10-63)

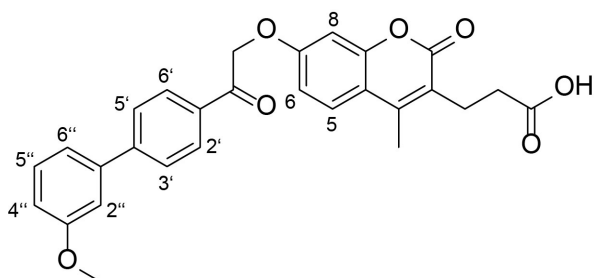

Ethyl 3-[7-[2-[4-(3-methoxyphenyl)phenyl]-2-oxo-ethoxy]-4-methyl-2-oxo-chromen-3-yl]propanoate (**Scaff10-62**) (50 mg, 0.10 mmol) was saponificated in a mixture of 0.6 ml DMF and 1 ml 1 M sodium hydroxide at 95 °C for 0.3 h. Dropwise addition of 1 M H<sub>2</sub>SO<sub>4</sub> resulted in precipitation of the product. The precipitated solid was filtered and purified using preparative HPLC with the following gradient: 20 % to 90 % ACN in H<sub>2</sub>O in 80 min. The product eluted at t<sub>R</sub> = 55 min and was obtained after lyophilisation as white solid in 26 % yield (12 mg).

<sup>1</sup>H NMR (300 MHz, DMSO-d<sub>6</sub>): δ(ppm) = 2.32 – 2.45 (t, J = 7.32 Hz, 2H, -CH<sub>2</sub>-CH<sub>2</sub>-COOH), 2.39 – 2.44 (s, 3H, Ar-CH<sub>3</sub>), 2.73 – 2.84 (t, J = 7.32 Hz, 2H, -CH<sub>2</sub>-CH<sub>2</sub>-COOH), 3.79 – 3.89 (s, 3H, -OCH<sub>3</sub>), 5.72 – 5.80 (s, 2H, -CO-CH<sub>2</sub>-OAr), 6.97 – 7.11 (m, 3H, H-6, -8, -4''), 7.27 – 7.37 (m, 2H, H-2'', -6''), 7.40 – 7.48 (t, J = 8.55 Hz, 1H, H-5''), 7.69 – 7.77 (d, J = 8.54 Hz, 1H, H-5), 7.86 – 7.93 (d, J = 8.54 Hz, 2H, H-3', -5'), 8.08 – 8.15 (d, J = 8.55 Hz, 2H, H-2', -6')

ESI-MS: cal. 473.16, exp. 473.1 ([M+H]<sup>+</sup>)

HPLC: 99 % purity at 254 nm

t<sub>R</sub> (HPLC): 6.64 min; λ<sub>max</sub> = 291 nm and 308 nm

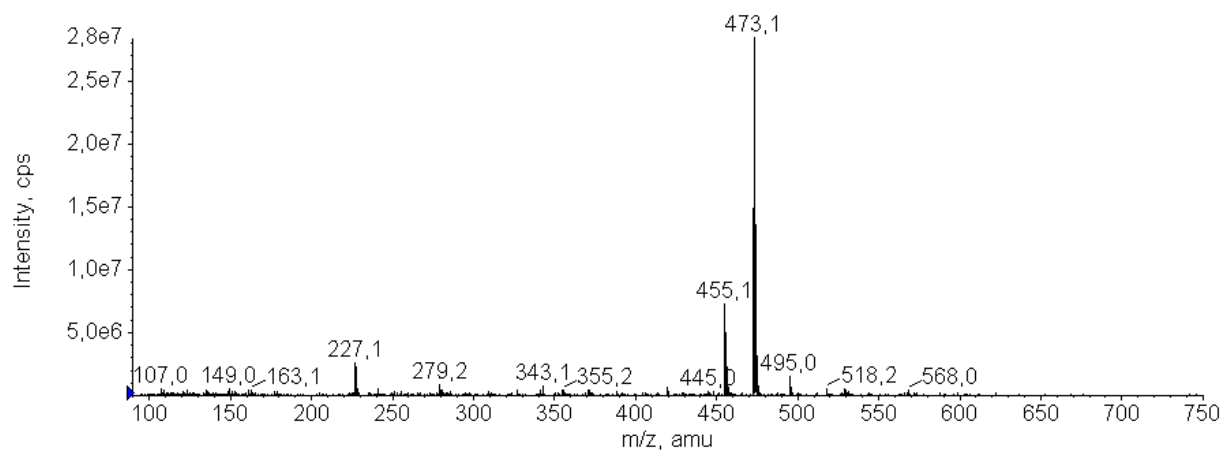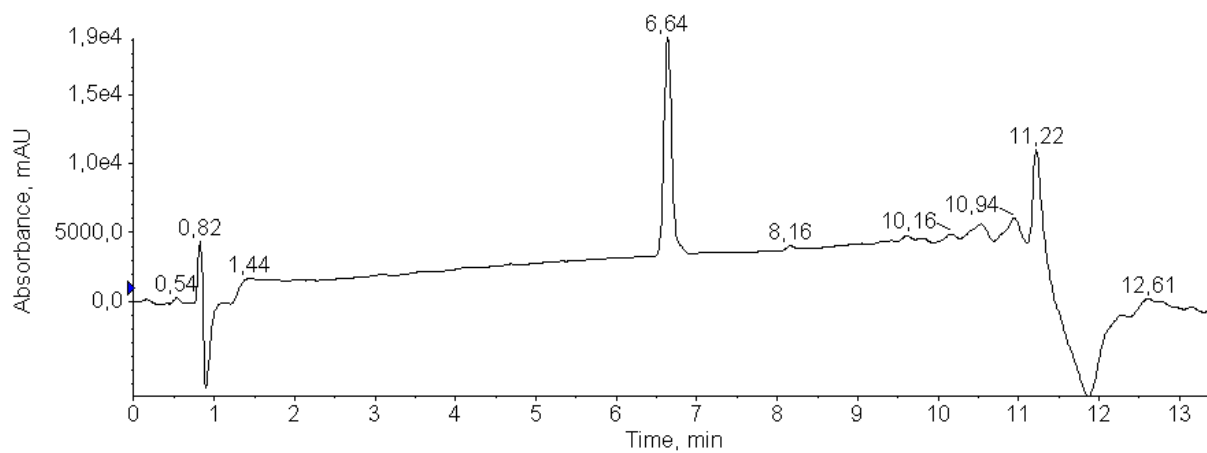

**Supporting Information Figure 98:** LC/MS analysis of **Scaff10-63**. Upper panel: Mass spectrum. Lower panel: according chromatogram.

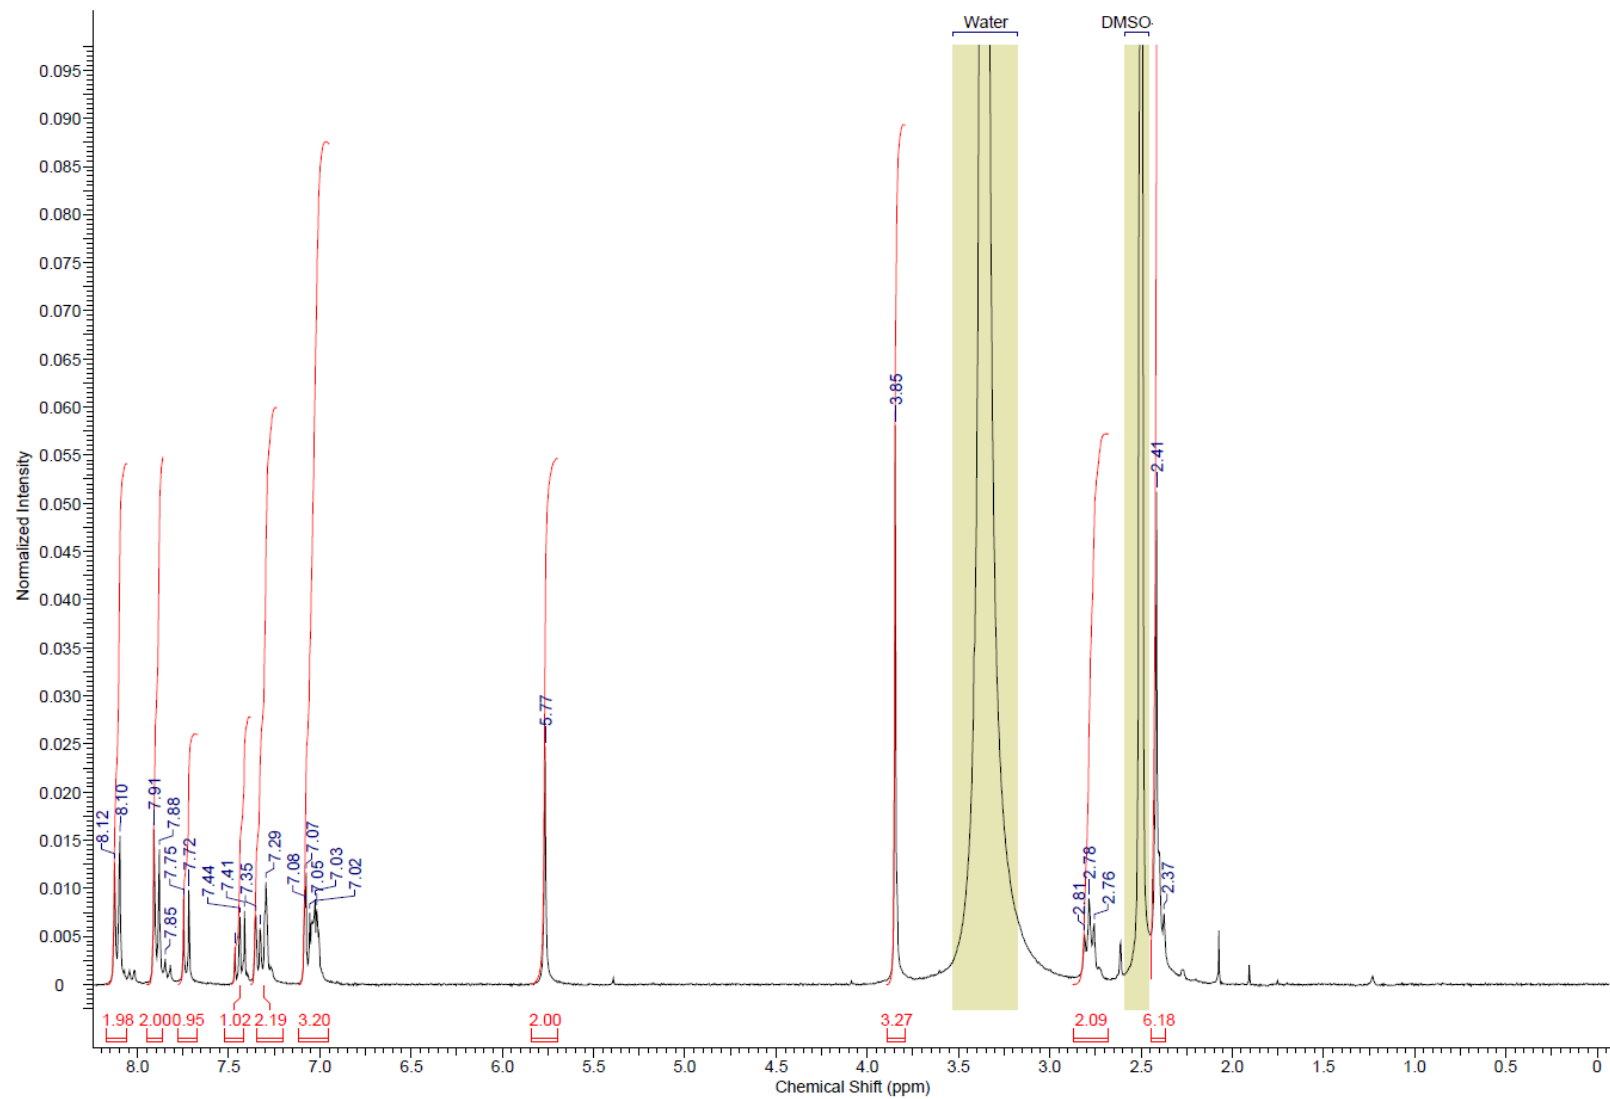

Supporting Information Figure 99: <sup>1</sup>H NMR spectrum of Scaff10-63, 300 MHz, DMSO-d<sub>6</sub>.

4.1.54 3-[3-[4-(3-Methoxyphenyl)phenyl]-5-methyl-7-oxo-furo[3,2-g]chromen-6-yl]propanoic acid (**Scaff10-64**)

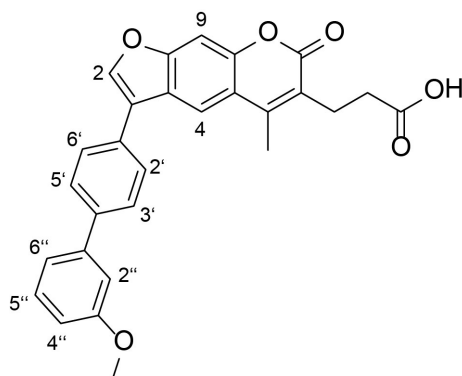

Ethyl 3-[7-[2-[4-(3-methoxyphenyl)phenyl]-2-oxo-ethoxy]-4-methyl-2-oxo-chromen-3-yl]propanoate (**Scaff10-62**) (115 mg, 0.23 mmol) was saponificated in a mixture of 1.5 ml DMF and 3 ml 3 M sodium hydroxide at 90 °C for 1 h. The product was purified using preparative HPLC with the following gradient: 25 % to 95 % ACN in H<sub>2</sub>O in 80 min. The product eluted at  $t_R = 43$  min and was obtained after lyophilisation as yellowish solid in 21 % yield (22 mg).

<sup>1</sup>H NMR (300 MHz, DMSO-d<sub>6</sub>):  $\delta$ (ppm) = 2.34 – 2.47 (t, J = 7.32 Hz, 2H, -CH<sub>2</sub>-CH<sub>2</sub>-COOH), 2.54 – 2.65 (s, 3H, Ar-CH<sub>3</sub>), 2.76 – 2.94 (t, J = 7.32 Hz, 2H, -CH<sub>2</sub>-CH<sub>2</sub>-COOH), 3.77 – 3.96 (s, 3H, -OCH<sub>3</sub>), 6.93 – 7.01 (d, J = 7.32 Hz, 1H, H-4''), 7.23 – 7.36 (m, 2H, H-2'', -6''), 7.37 – 7.47 (m, 1H, H-5''), 7.77 – 7.81 (s, 1H, H-9), 7.82 – 7.88 (d, J = 8.54 Hz, 2H, H-3', -5'), 7.88 – 7.96 (d, J = 8.54 Hz, 2H, H-2', -6'), 8.19 – 8.26 (s, 1H, H-4), 8.51 – 8.56 (s, 1H, H-2)

ESI-MS: cal. 455.14, exp. 455.1 ([M+H]<sup>+</sup>)

HPLC: 99 % purity at 254 nm

$t_R$  (HPLC): 7.54 min;  $\lambda_{max} = 251$  nm and 302 nm

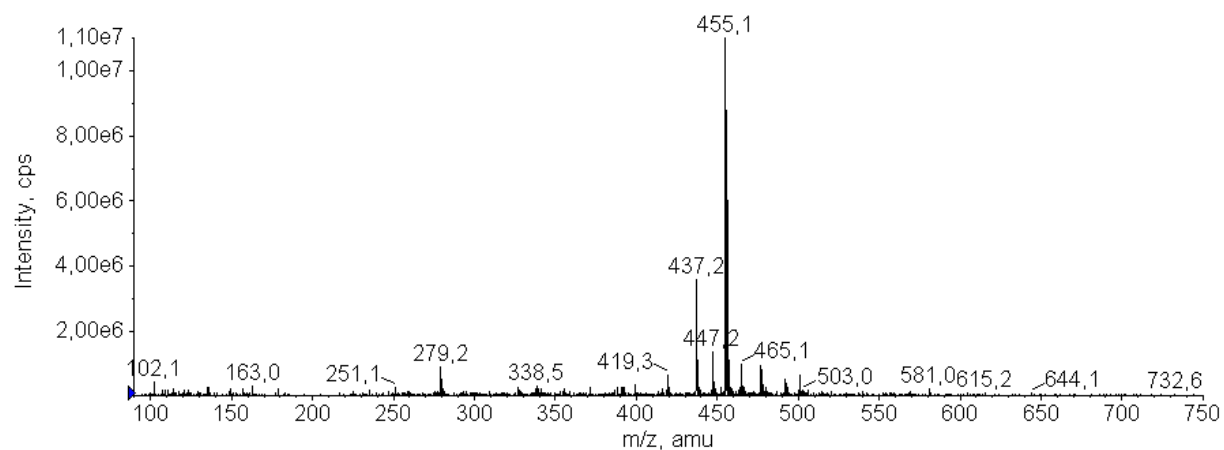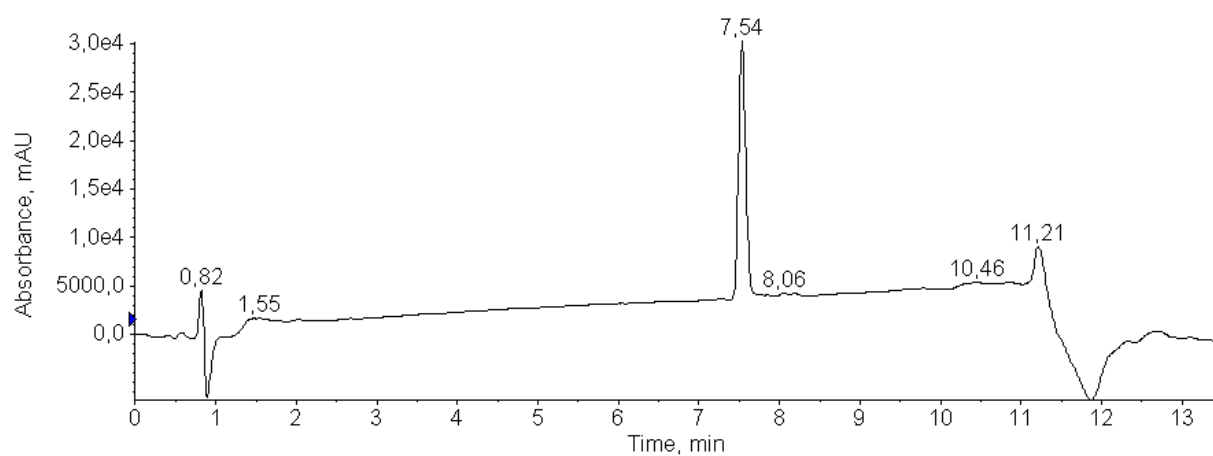

**Supporting Information Figure 100:** LC/MS analysis of **Scaff10-64**. Upper panel: Mass spectrum. Lower panel: according chromatogram.

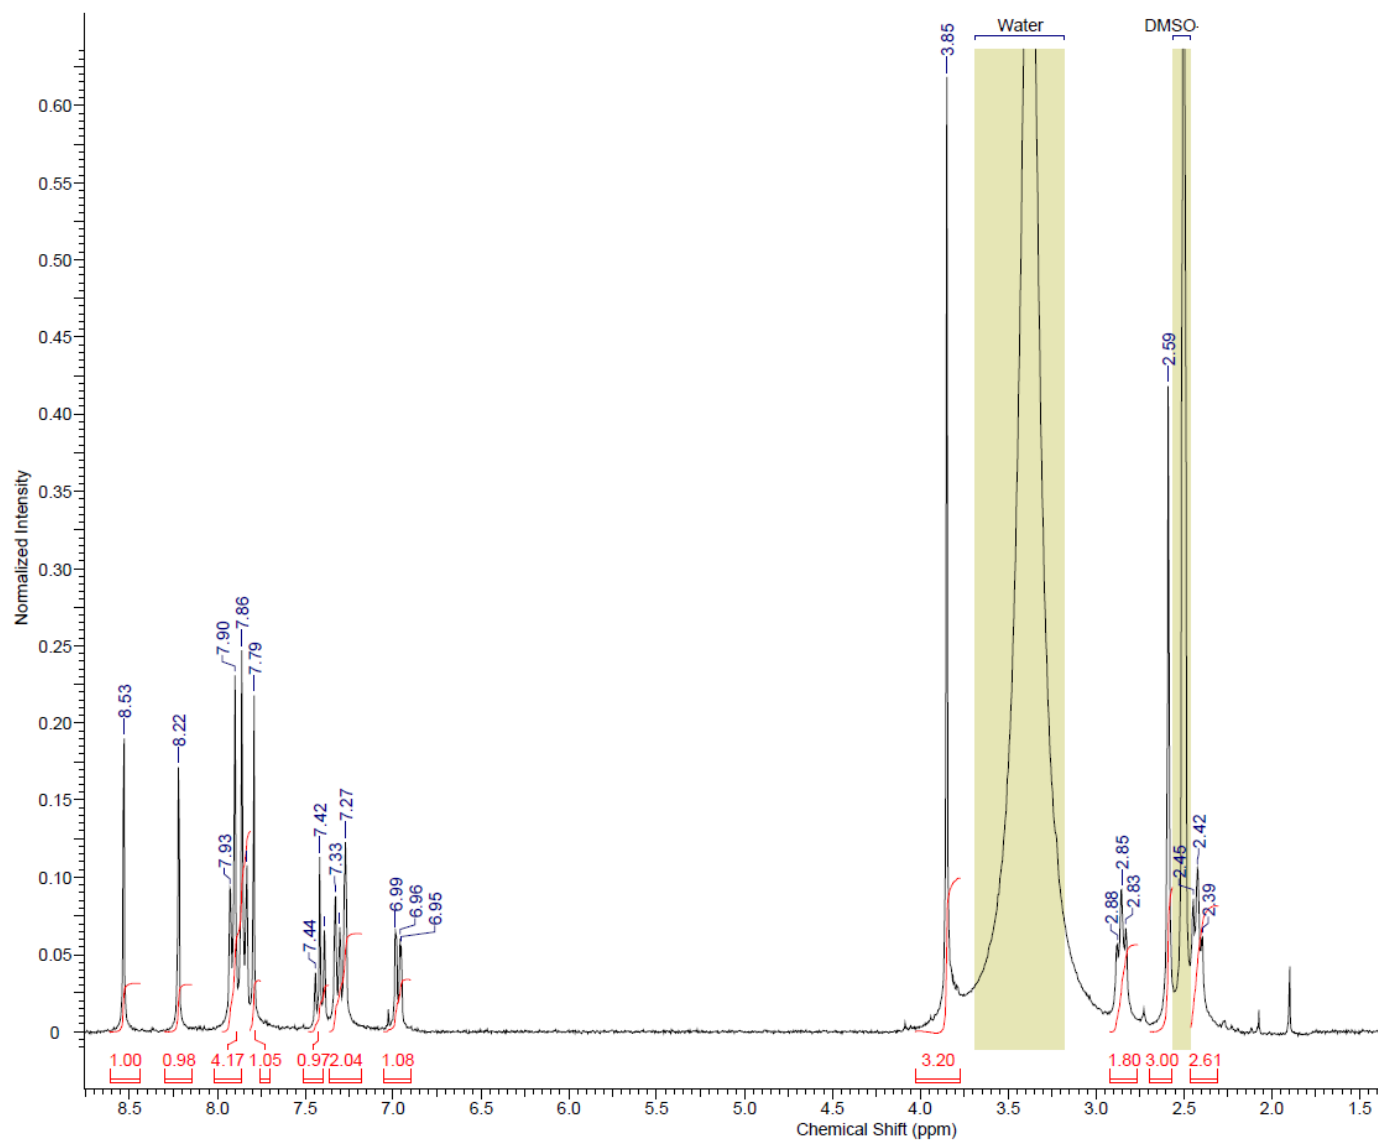

Supporting Information Figure 101:  $^1\text{H}$  NMR spectrum of Scaff10-64, 300 MHz,  $\text{DMSO-d}_6$ .
